# Supplementary material for: Stereoselective Synthesis and Antiproliferative Activity of Steviol-Based Diterpen Aminodiols
Source: MDPI journal article supplement (doi:10.3390/ijms21010184), 2019-12-26

**Supporting informations**  
**for**  
**Stereoselective synthesis and cytoselective toxicity of**  
**steviol-based diterpen aminodiols**

**Dániel Ozsvár<sup>1</sup>, Viktória Nagy<sup>2</sup>, István Zupkó<sup>2,3</sup> and Zsolt Szakonyi<sup>1,3\*</sup>**

<sup>1</sup> Institute of Pharmaceutical Chemistry, University of Szeged, Interdisciplinary Excellent Center, H-6720 Szeged, Eötvös utca 6, Hungary; [daniel.ozsvar@pharm.u-szeged.hu](mailto:daniel.ozsvar@pharm.u-szeged.hu)

<sup>2</sup> Department of Pharmacodynamics and Biopharmacy, University of Szeged, H-6720 Szeged, Eötvös utca 6, Hungary; [zupko@pharm.u-szeged.hu](mailto:zupko@pharm.u-szeged.hu), [nagy.viktoria@pharm.u-szeged.hu](mailto:nagy.viktoria@pharm.u-szeged.hu)

<sup>3</sup> Interdisciplinary Centre of Natural Products, University of Szeged, H-6720 Szeged, Eötvös utca 6, Hungary

\* Correspondence: [szakonyi@pharm.u-szeged.hu](mailto:szakonyi@pharm.u-szeged.hu); Tel.: +36-62-546809; Fax: +36-62-545705

## Contents

$^1\text{H}$ ,  $^{13}\text{C}$  NMR, COSY, NOESY, HSQC, HMBC spectra of new compounds 3 - 111

<sup>1</sup>H-NMR of compound 5

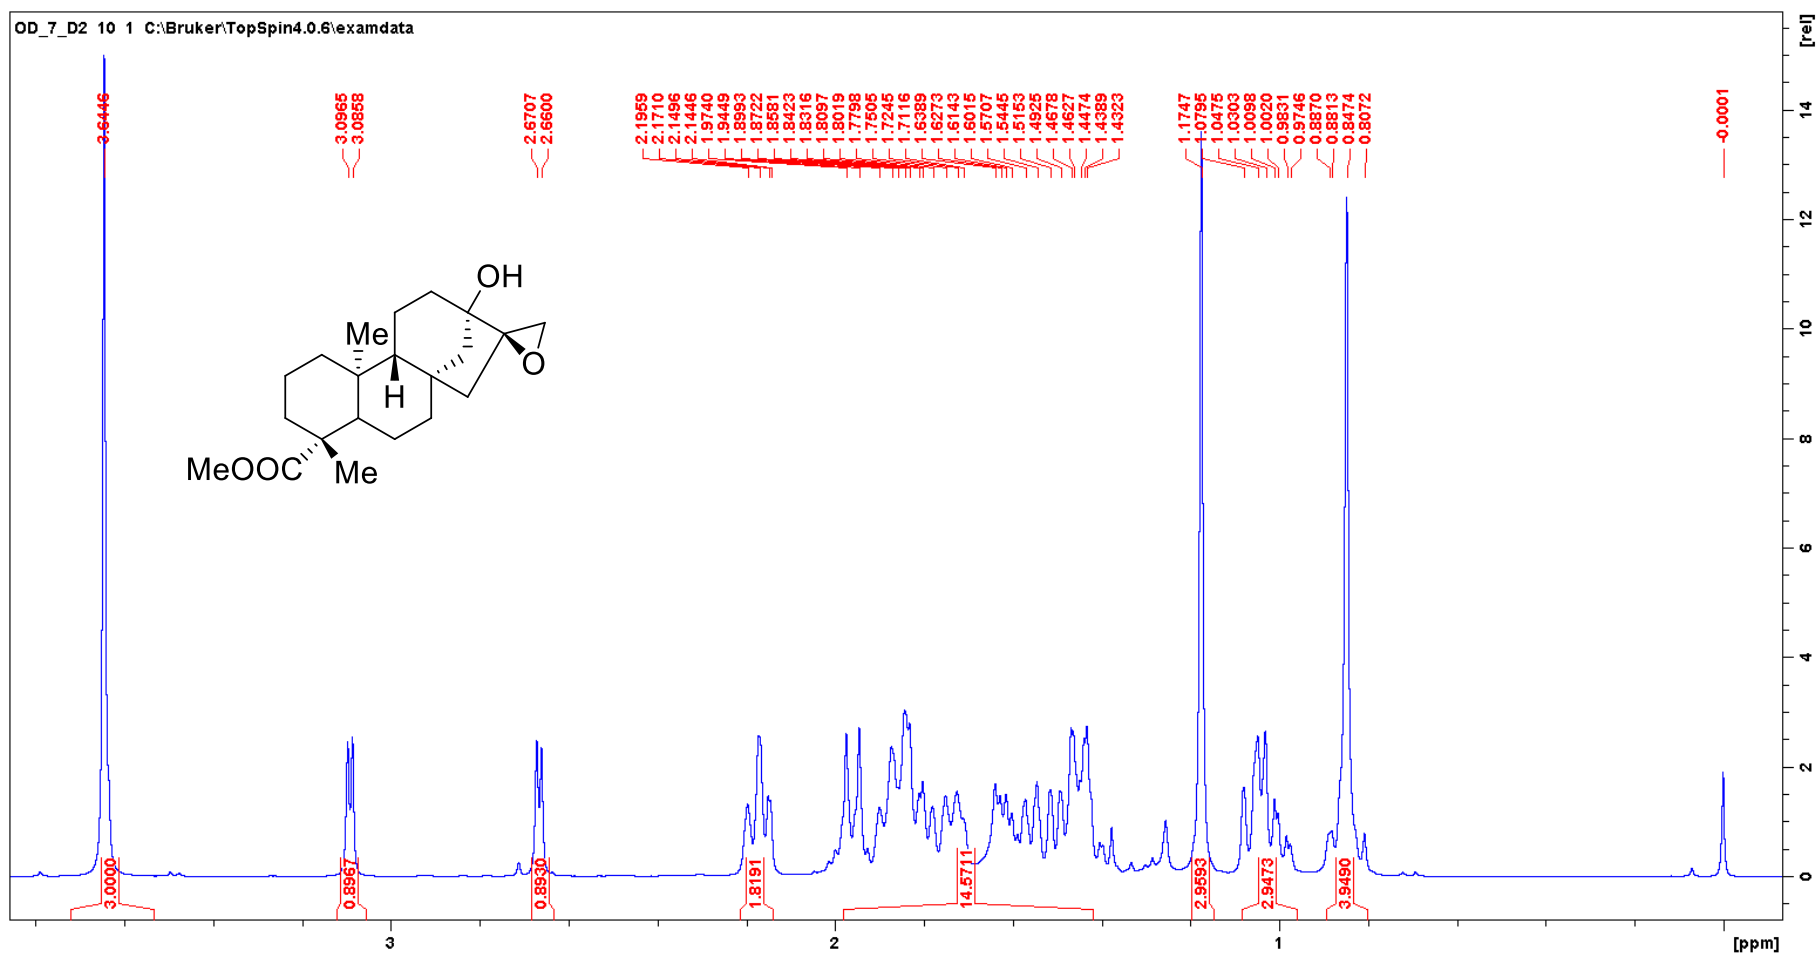

<sup>13</sup>C-NMR of compound 5

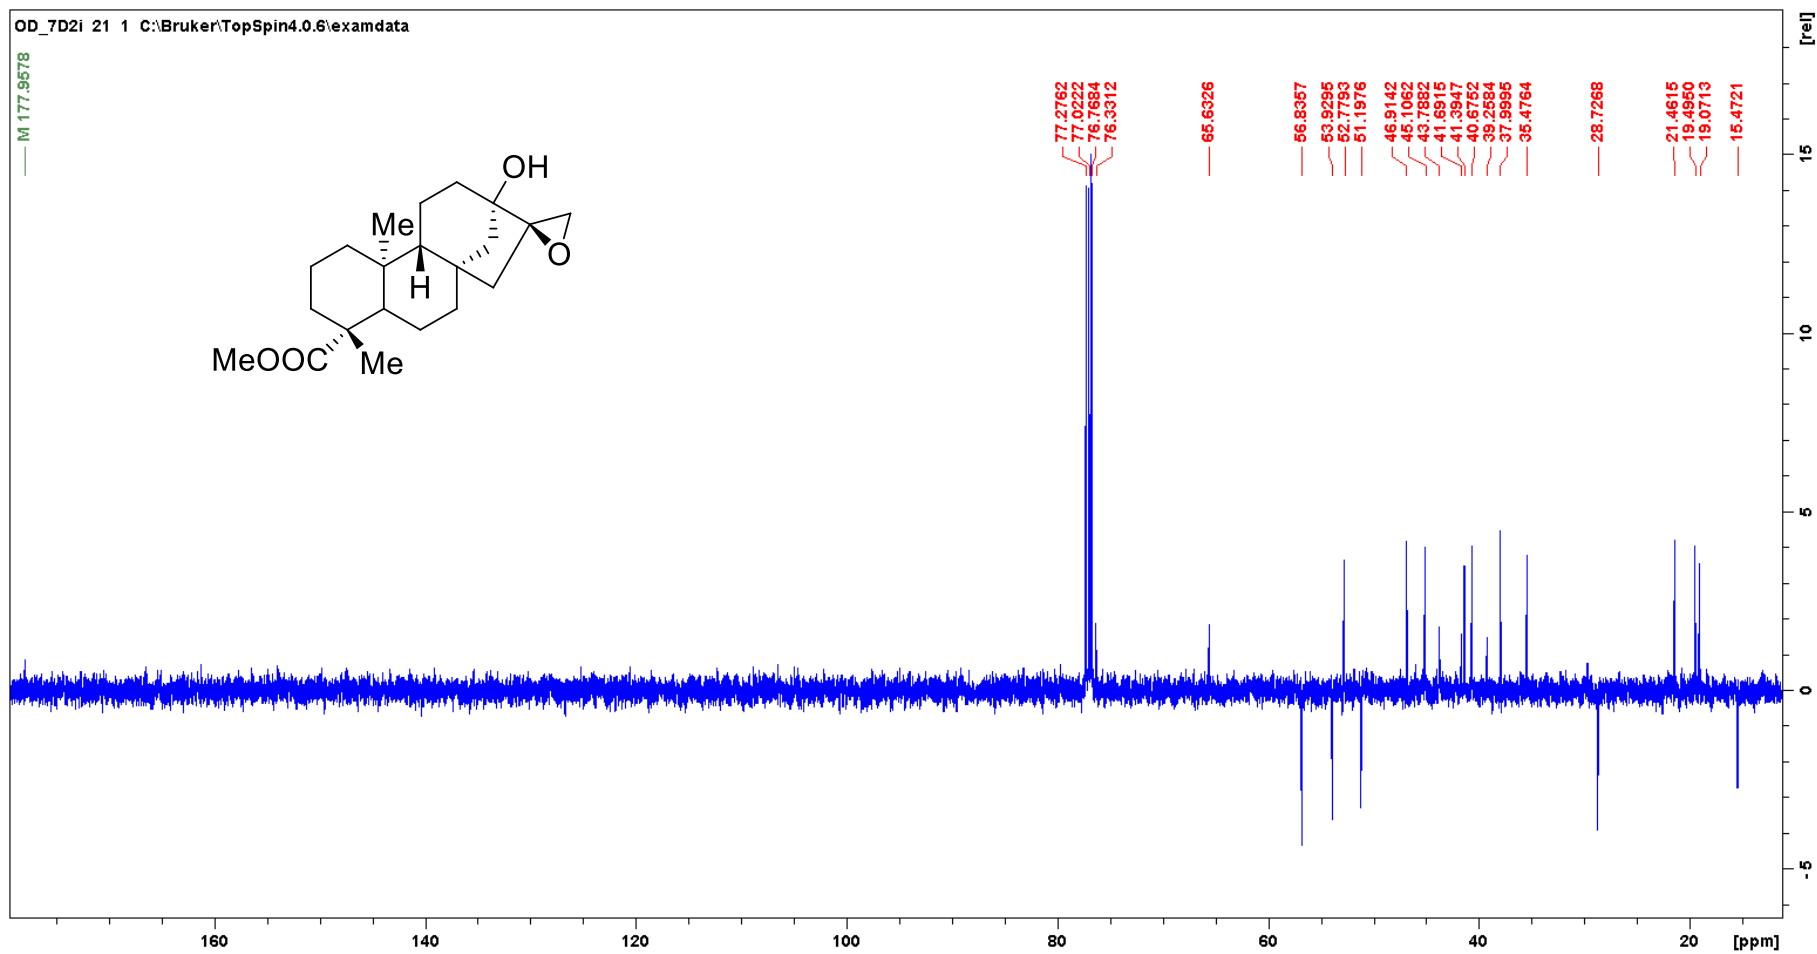

COSY of compound 5

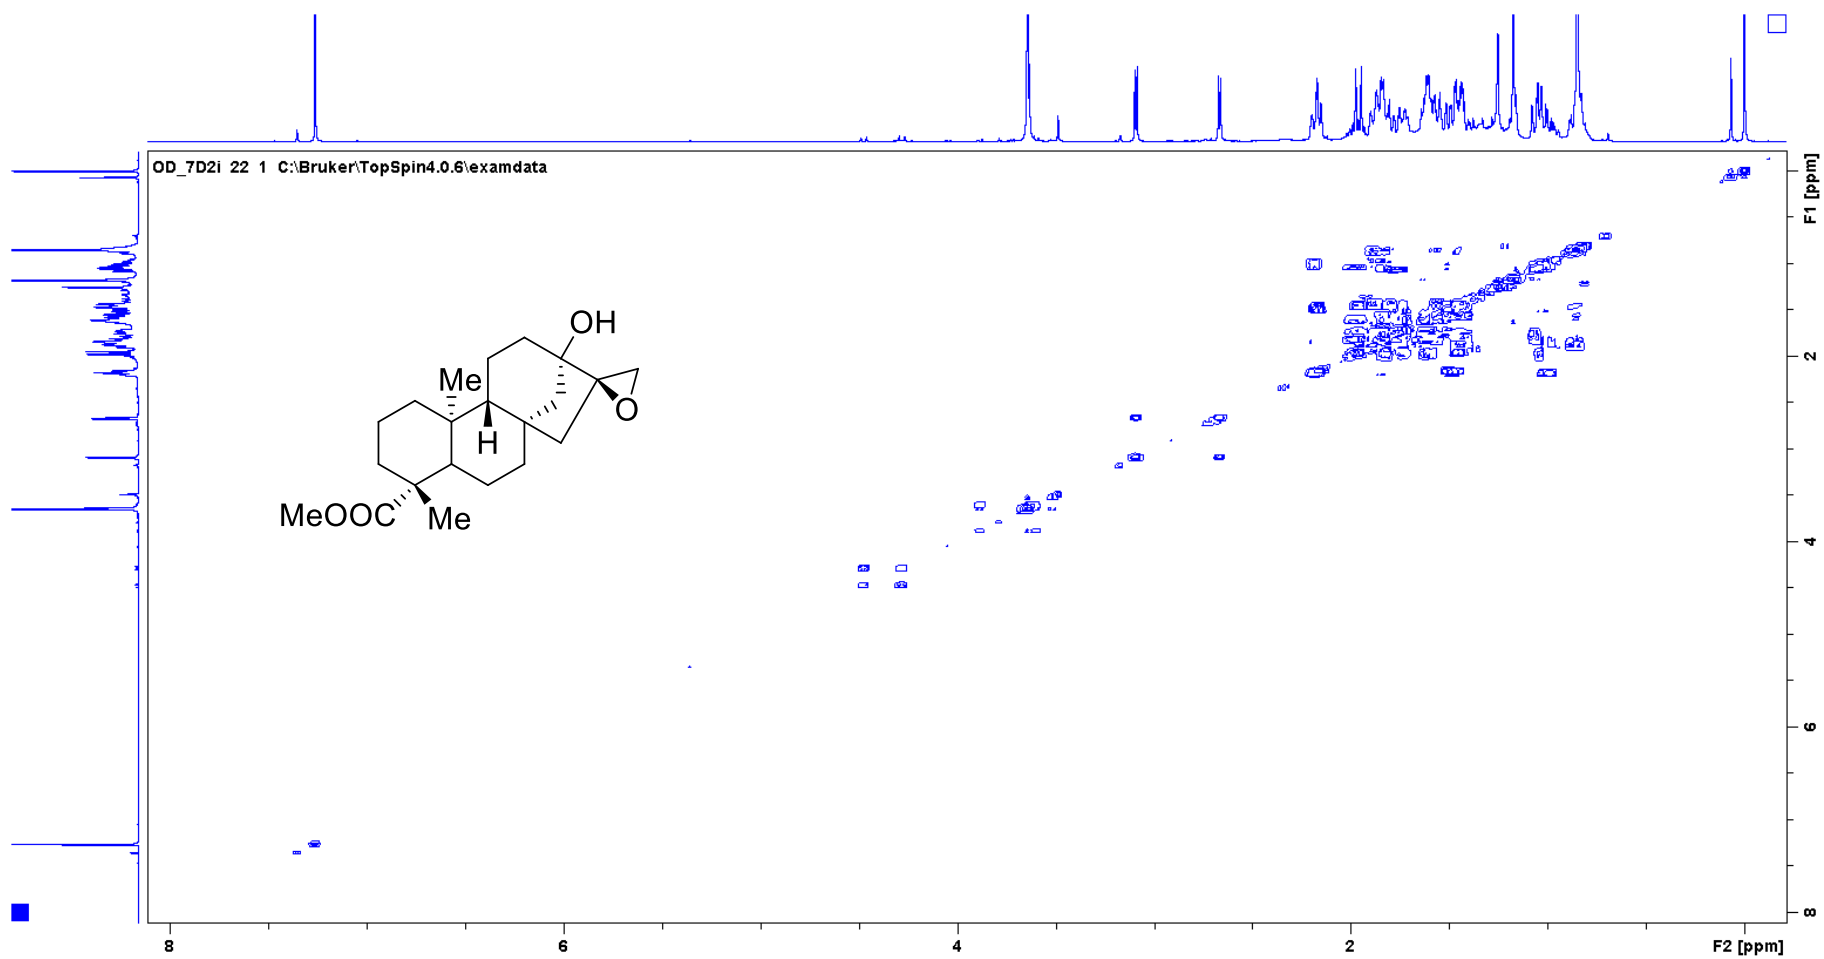

NOESY of compound 5

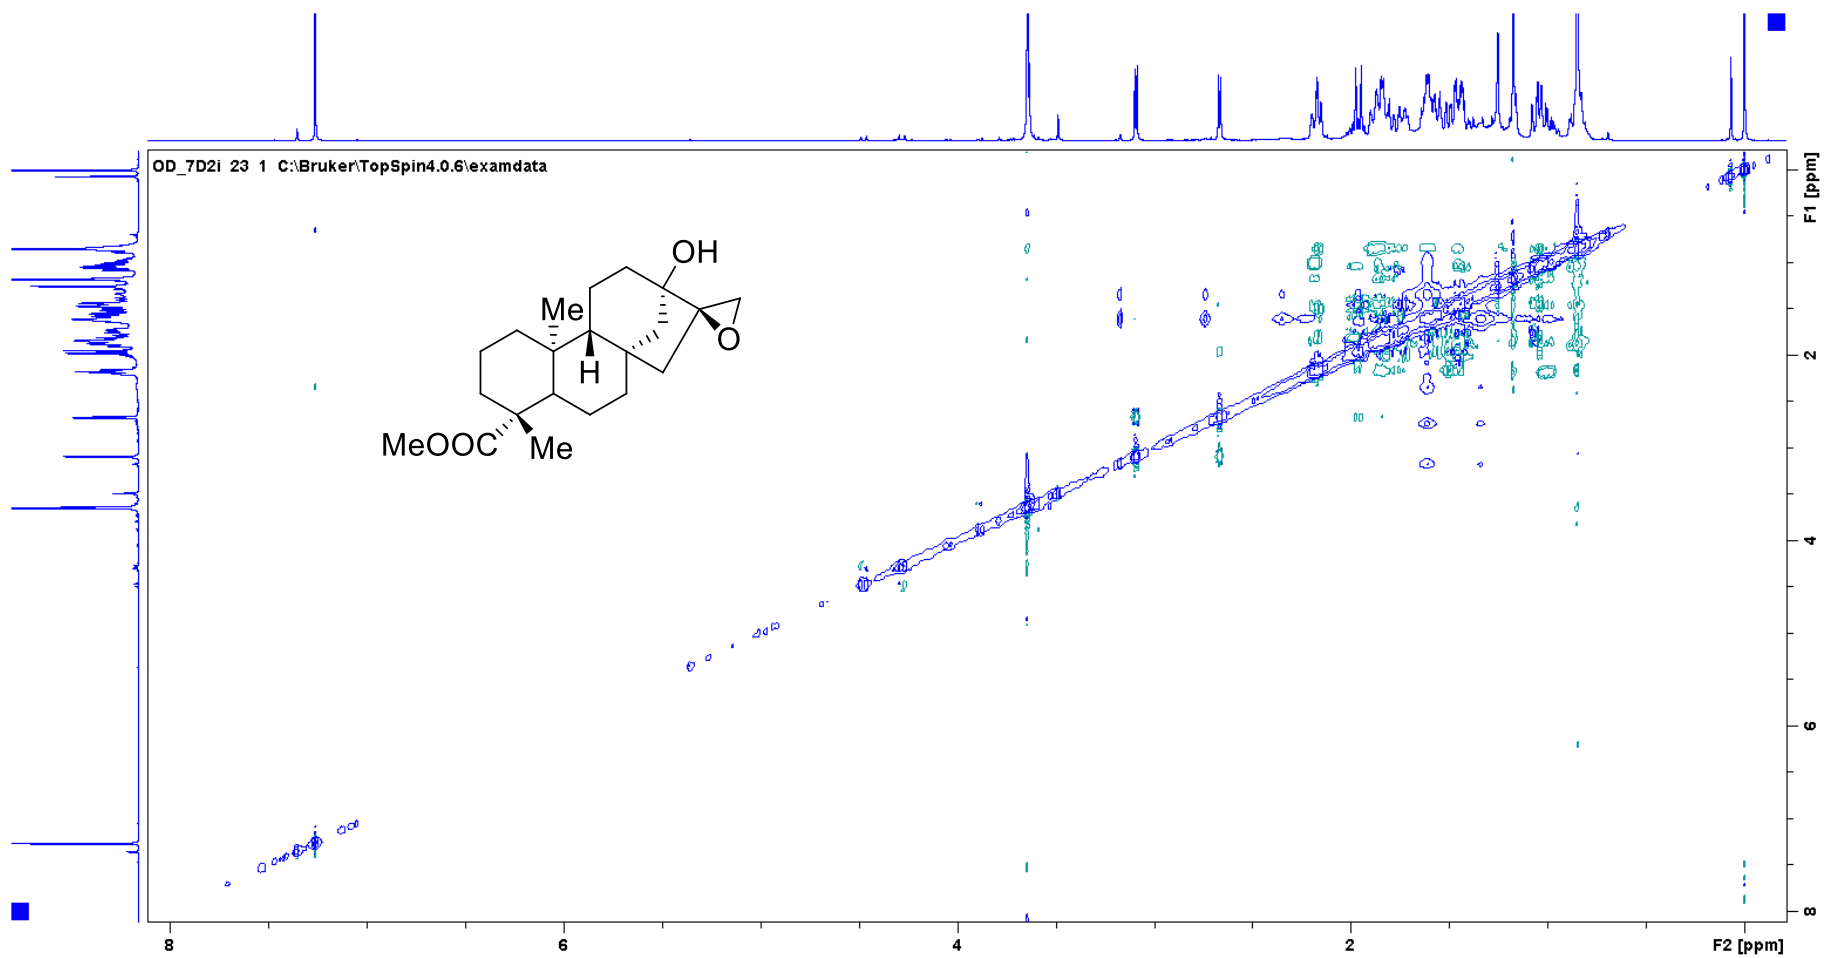



# HMBC of compound 5

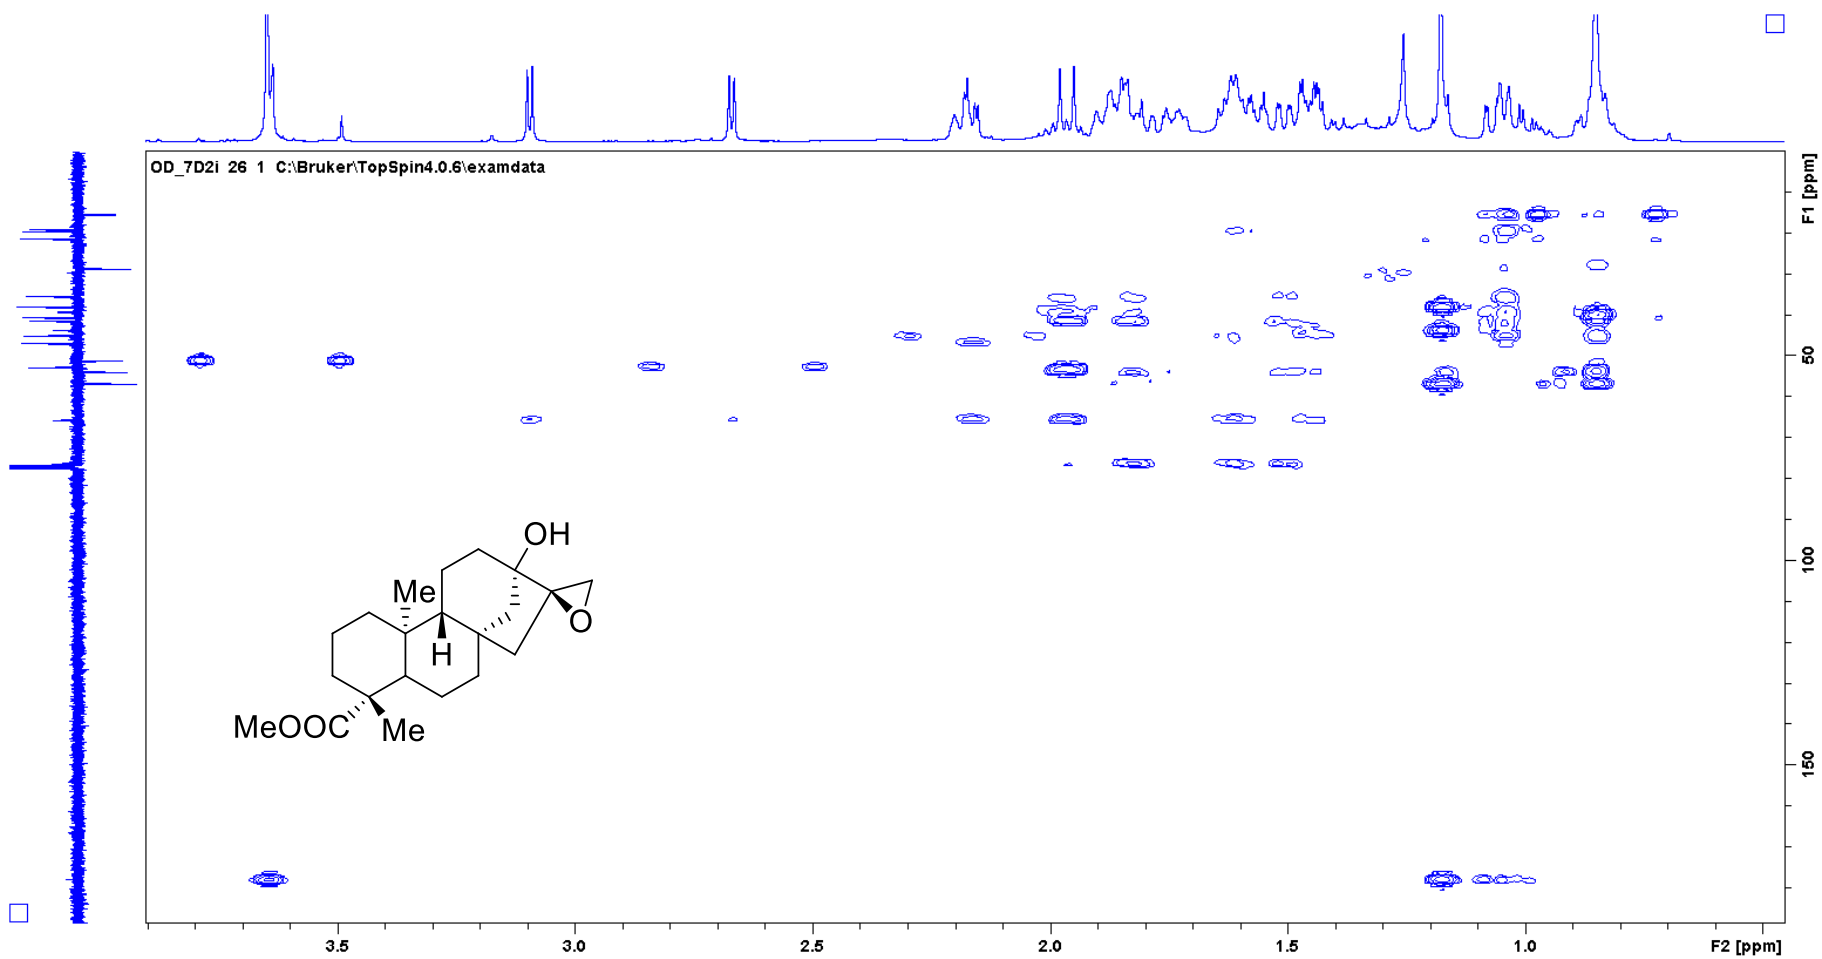



<sup>1</sup>H-NMR of compound 6

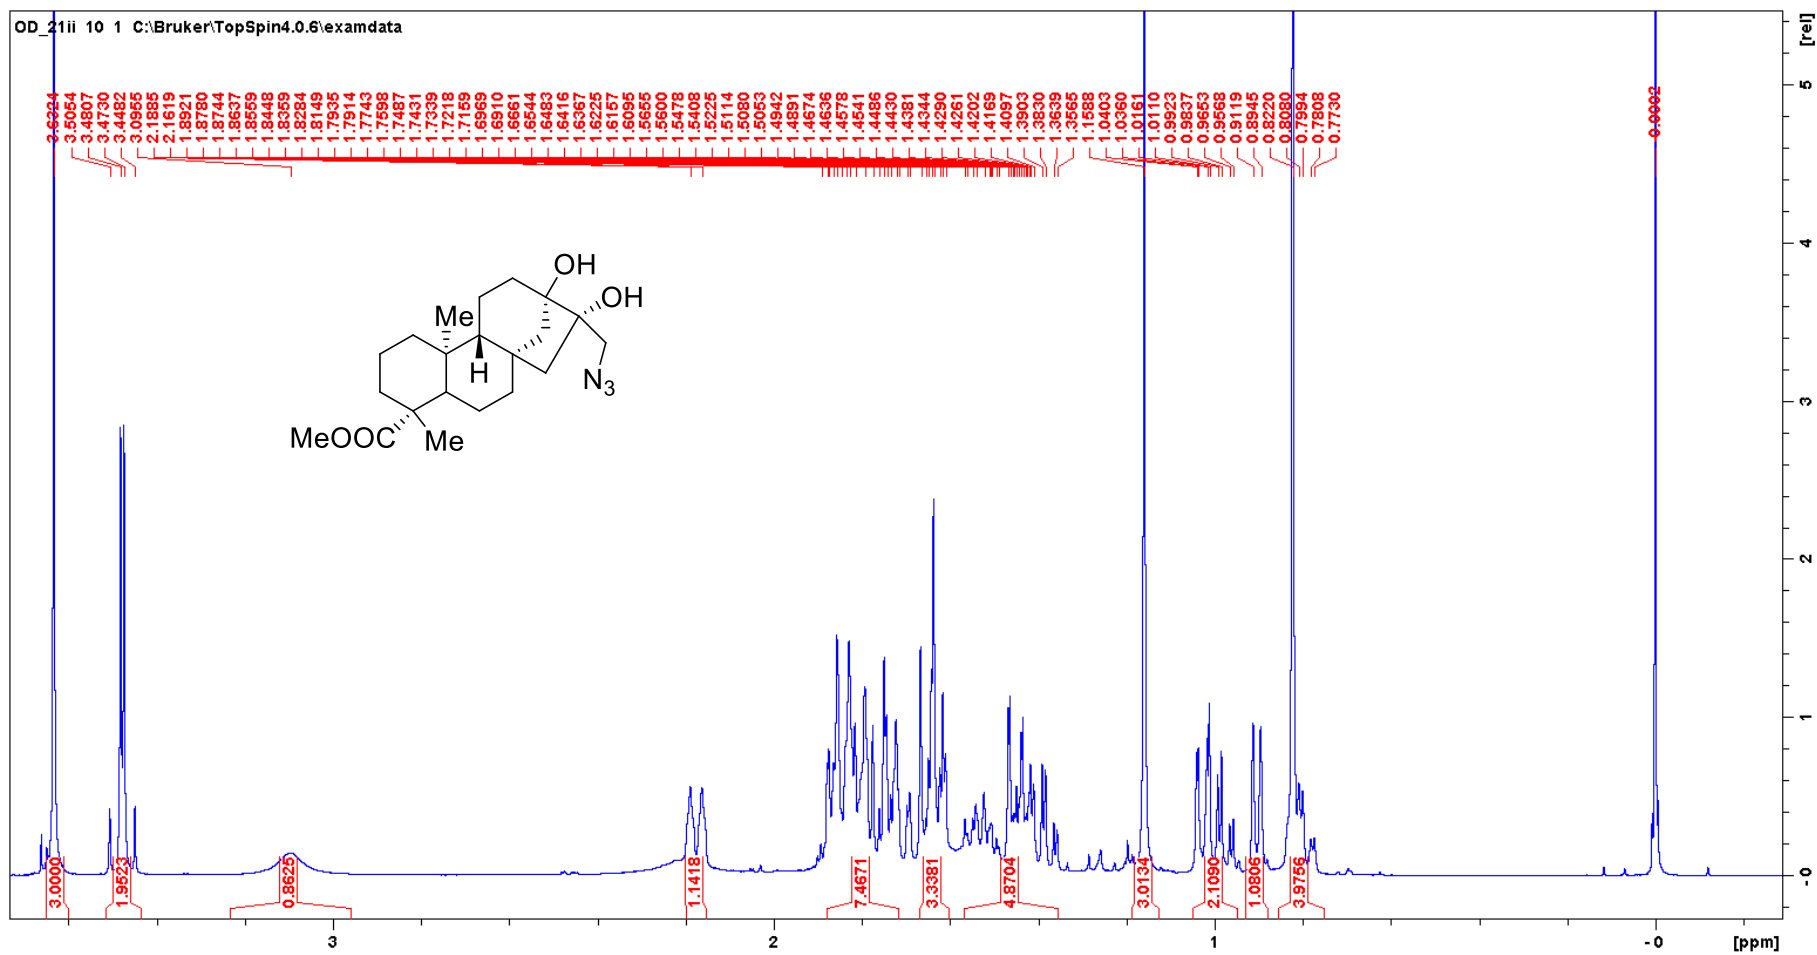

<sup>13</sup>C-NMR of compound 6

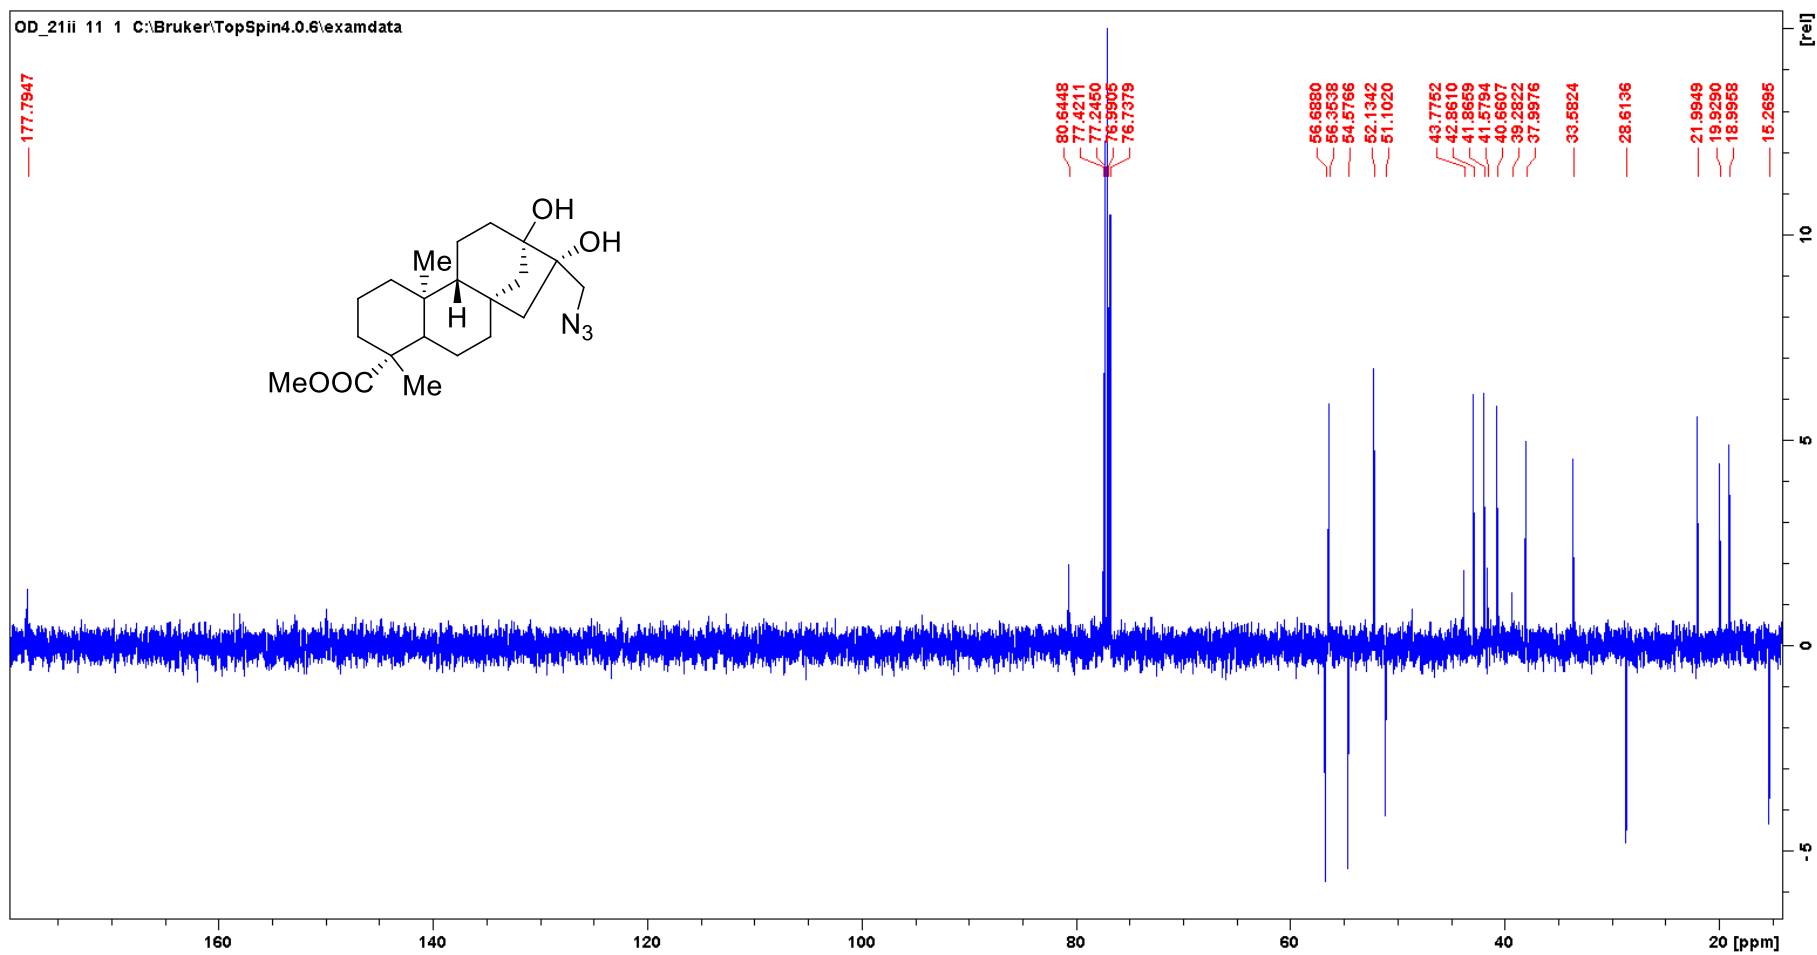

COSY of compound 6

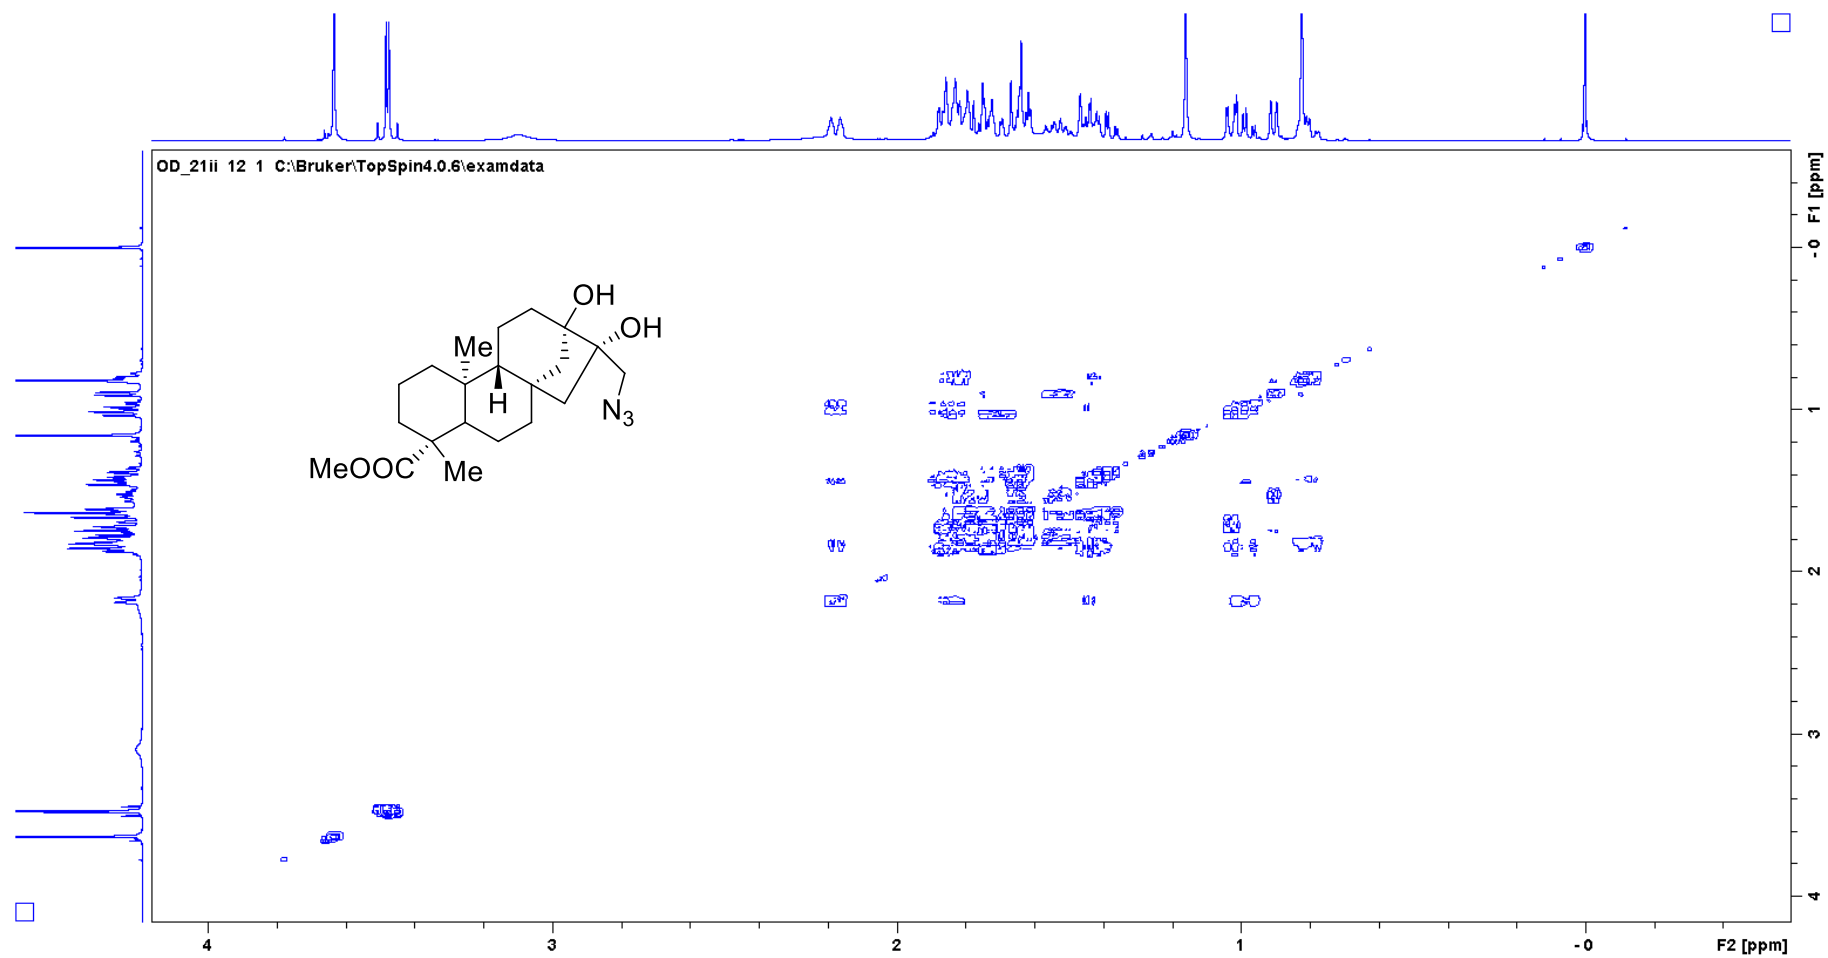

NOESY of compound 6

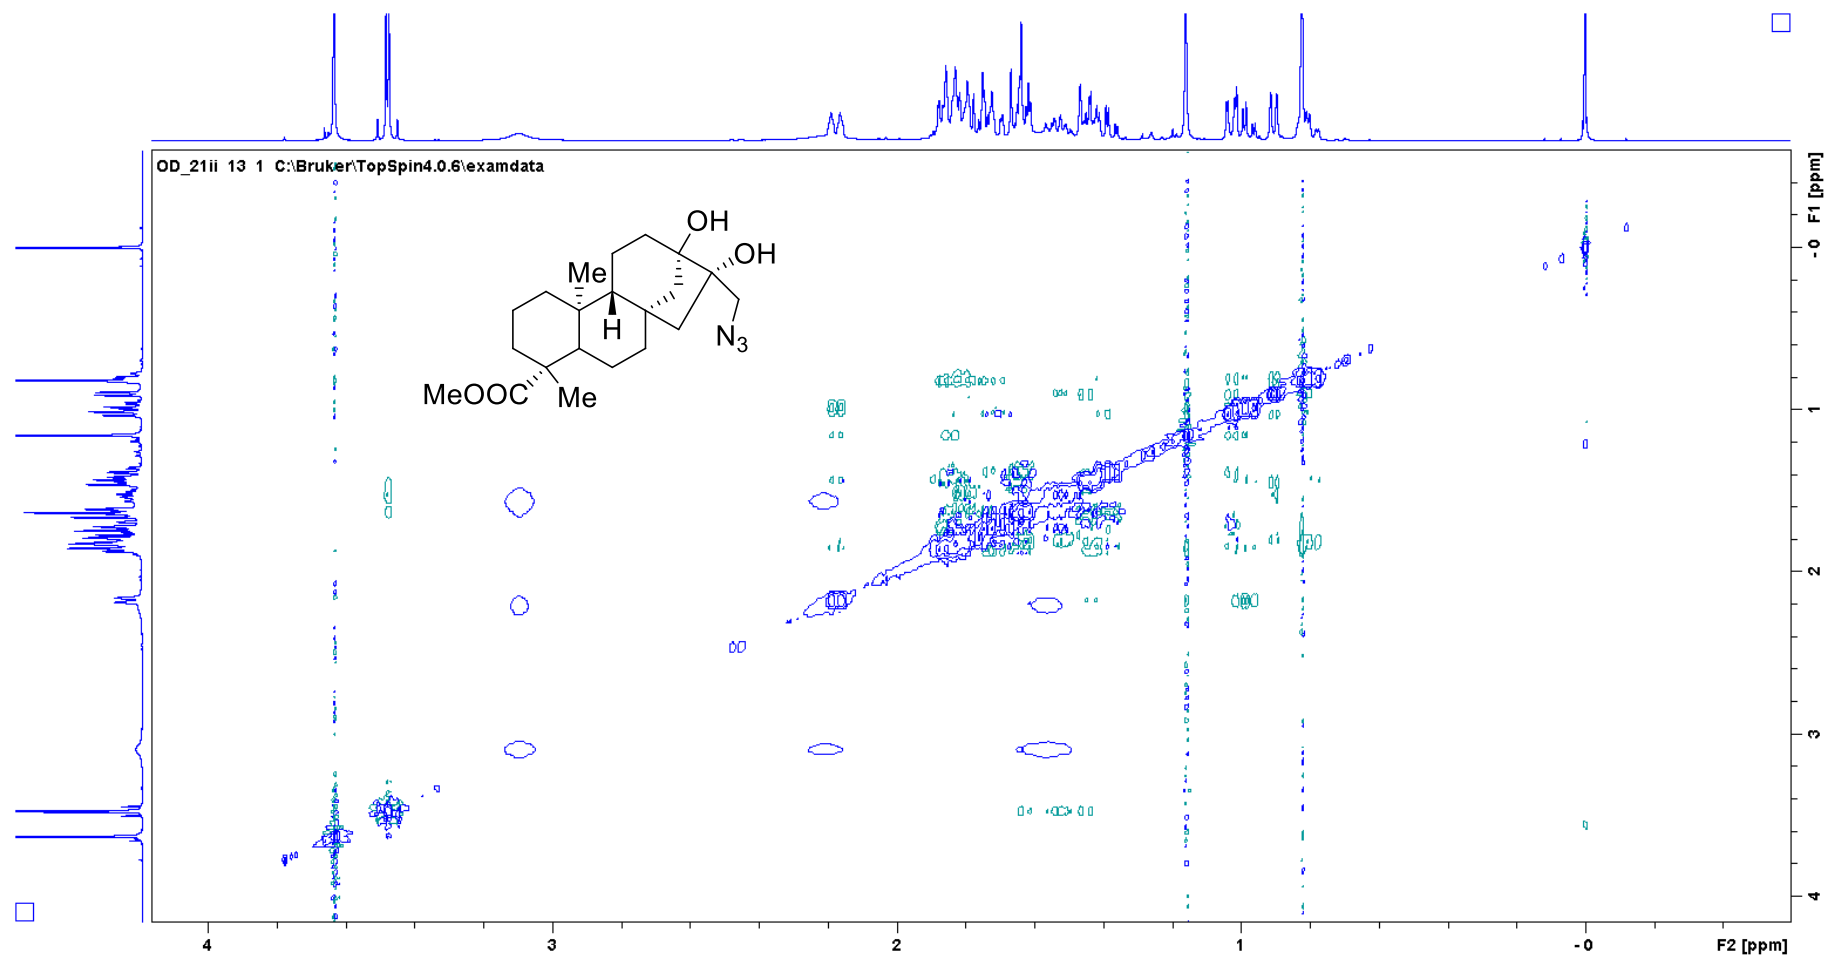

# HSQC of compound 6

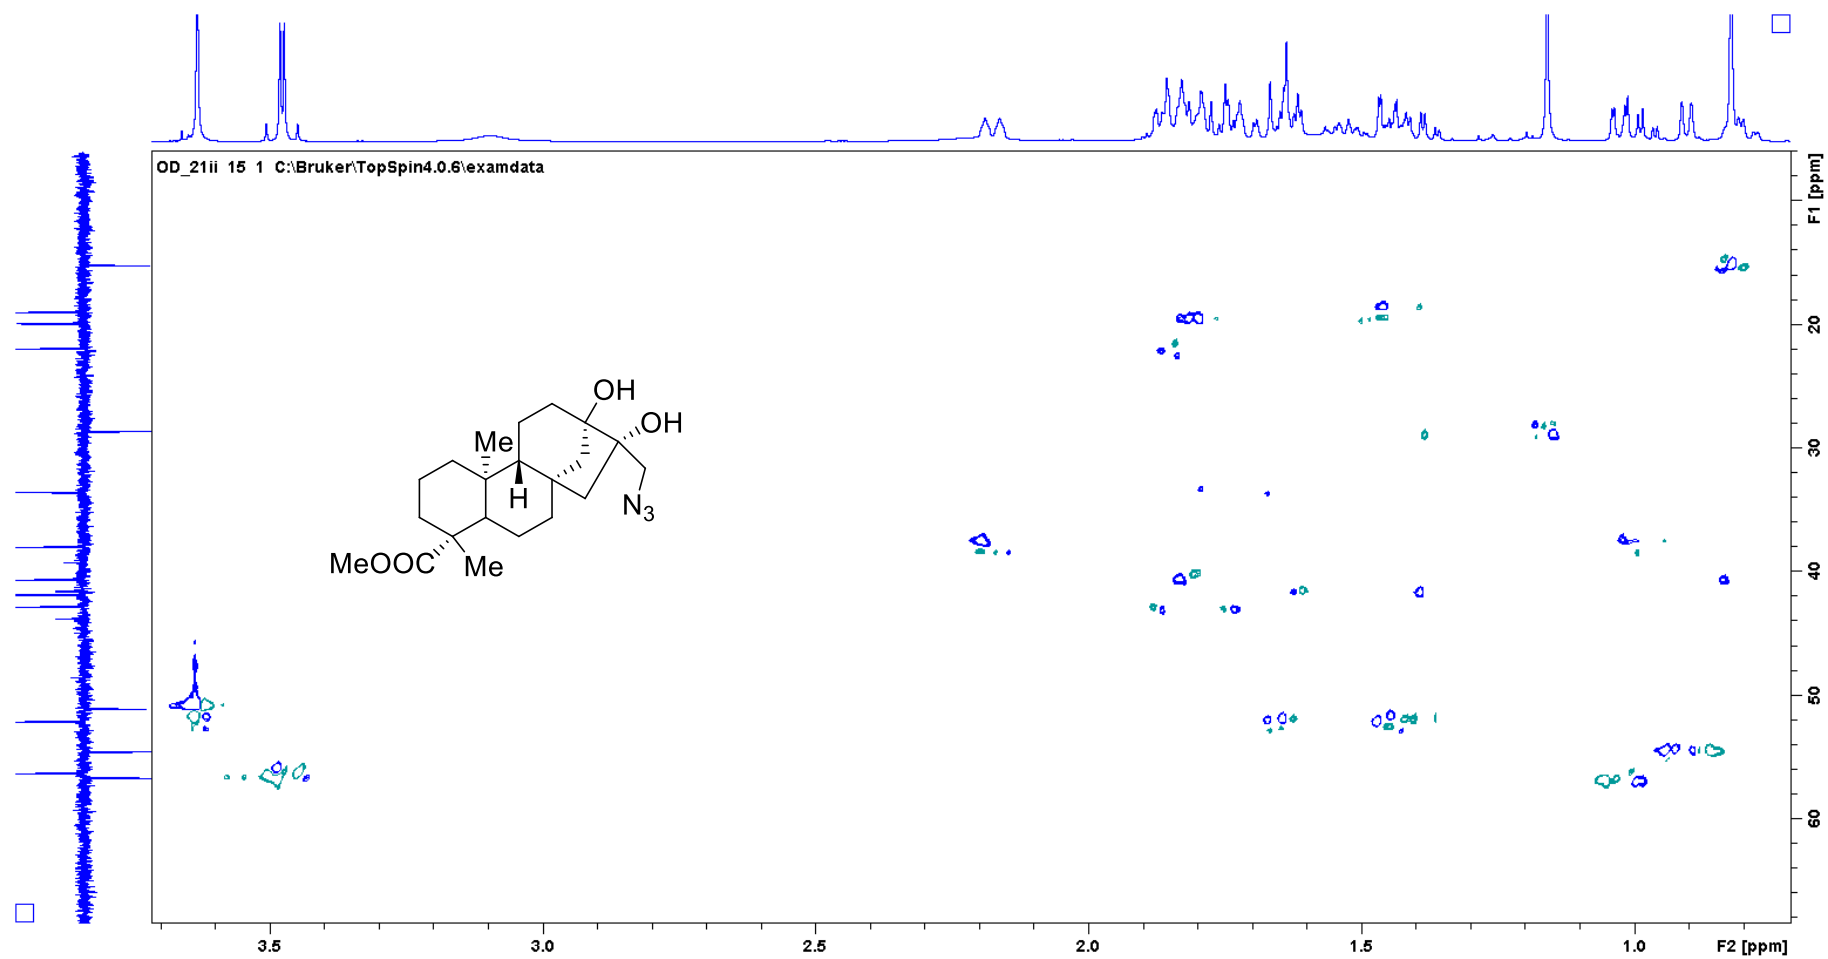

# HMBC of compound 6

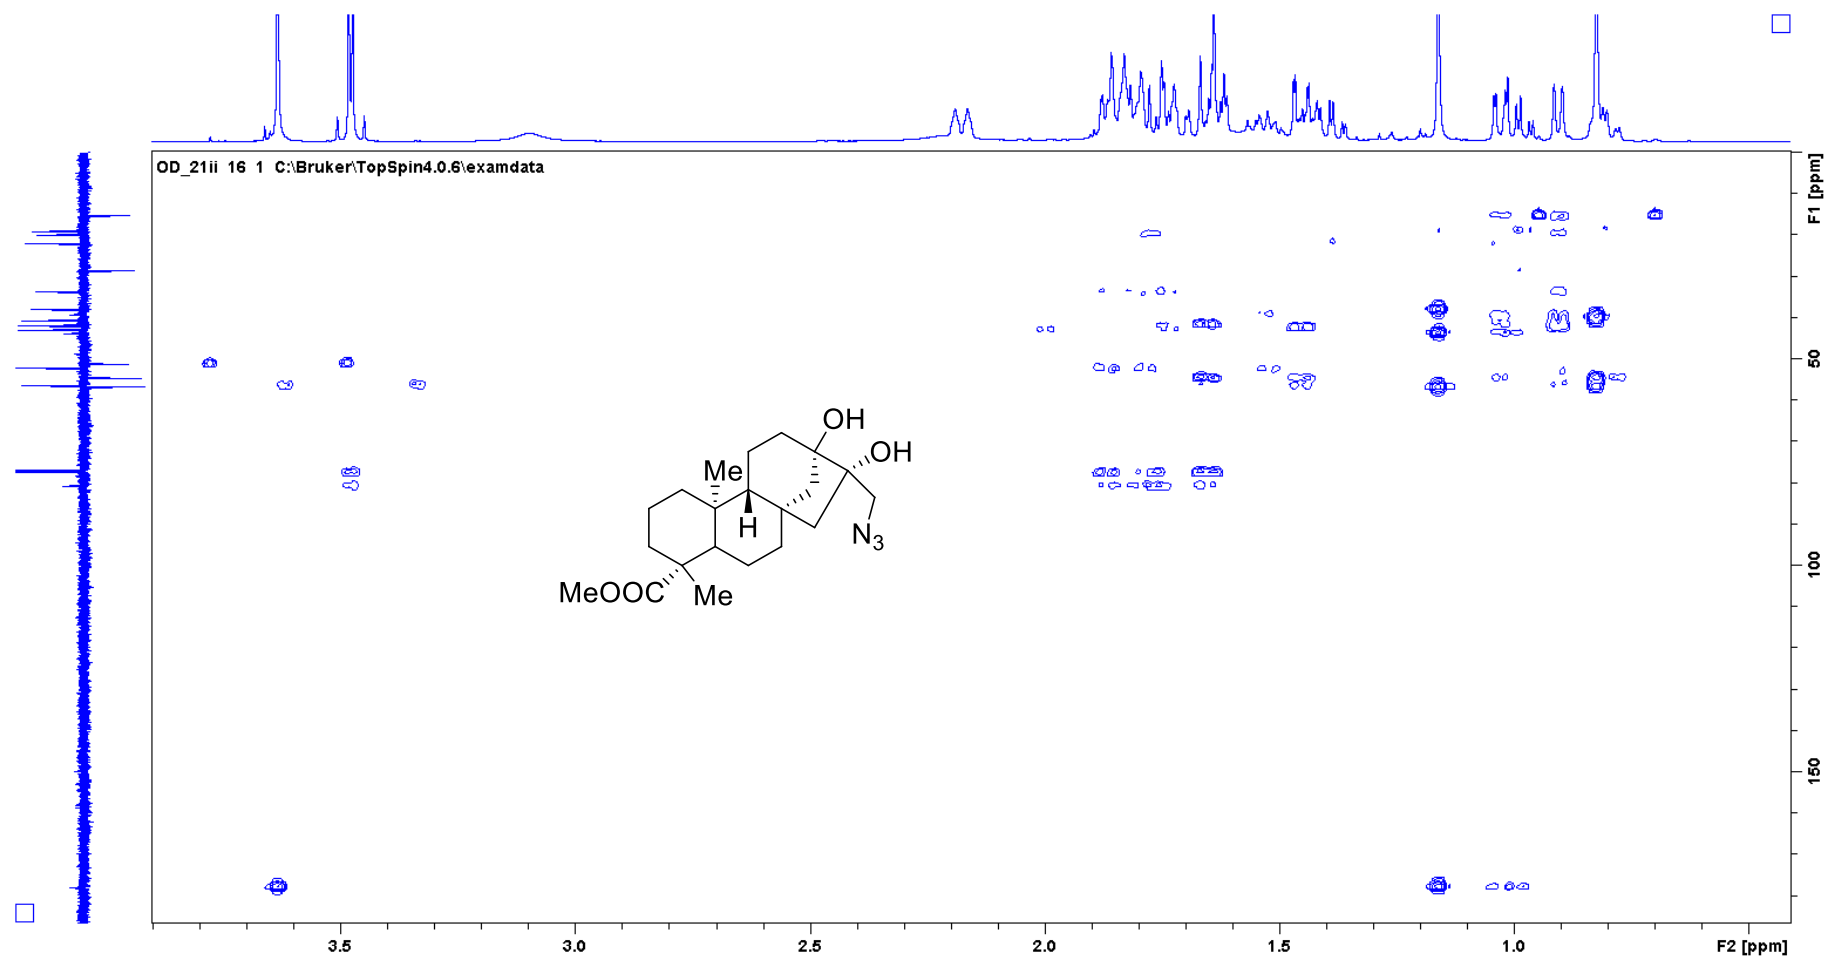

<sup>1</sup>H-NMR of compound 7

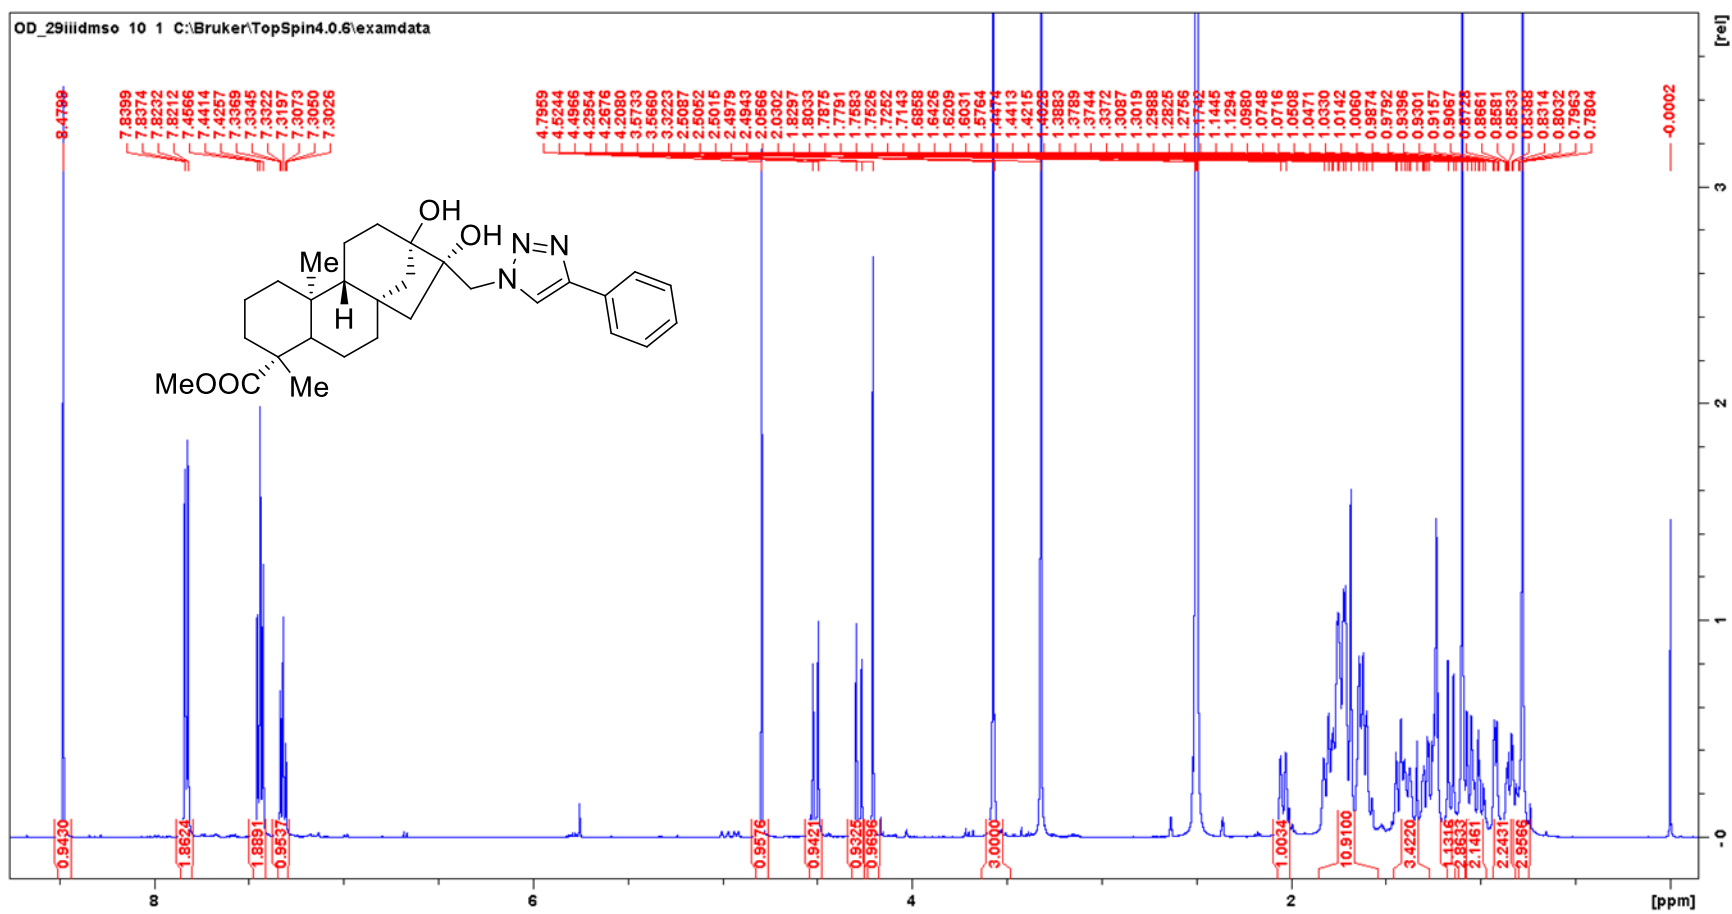

<sup>13</sup>C-NMR of compound 7

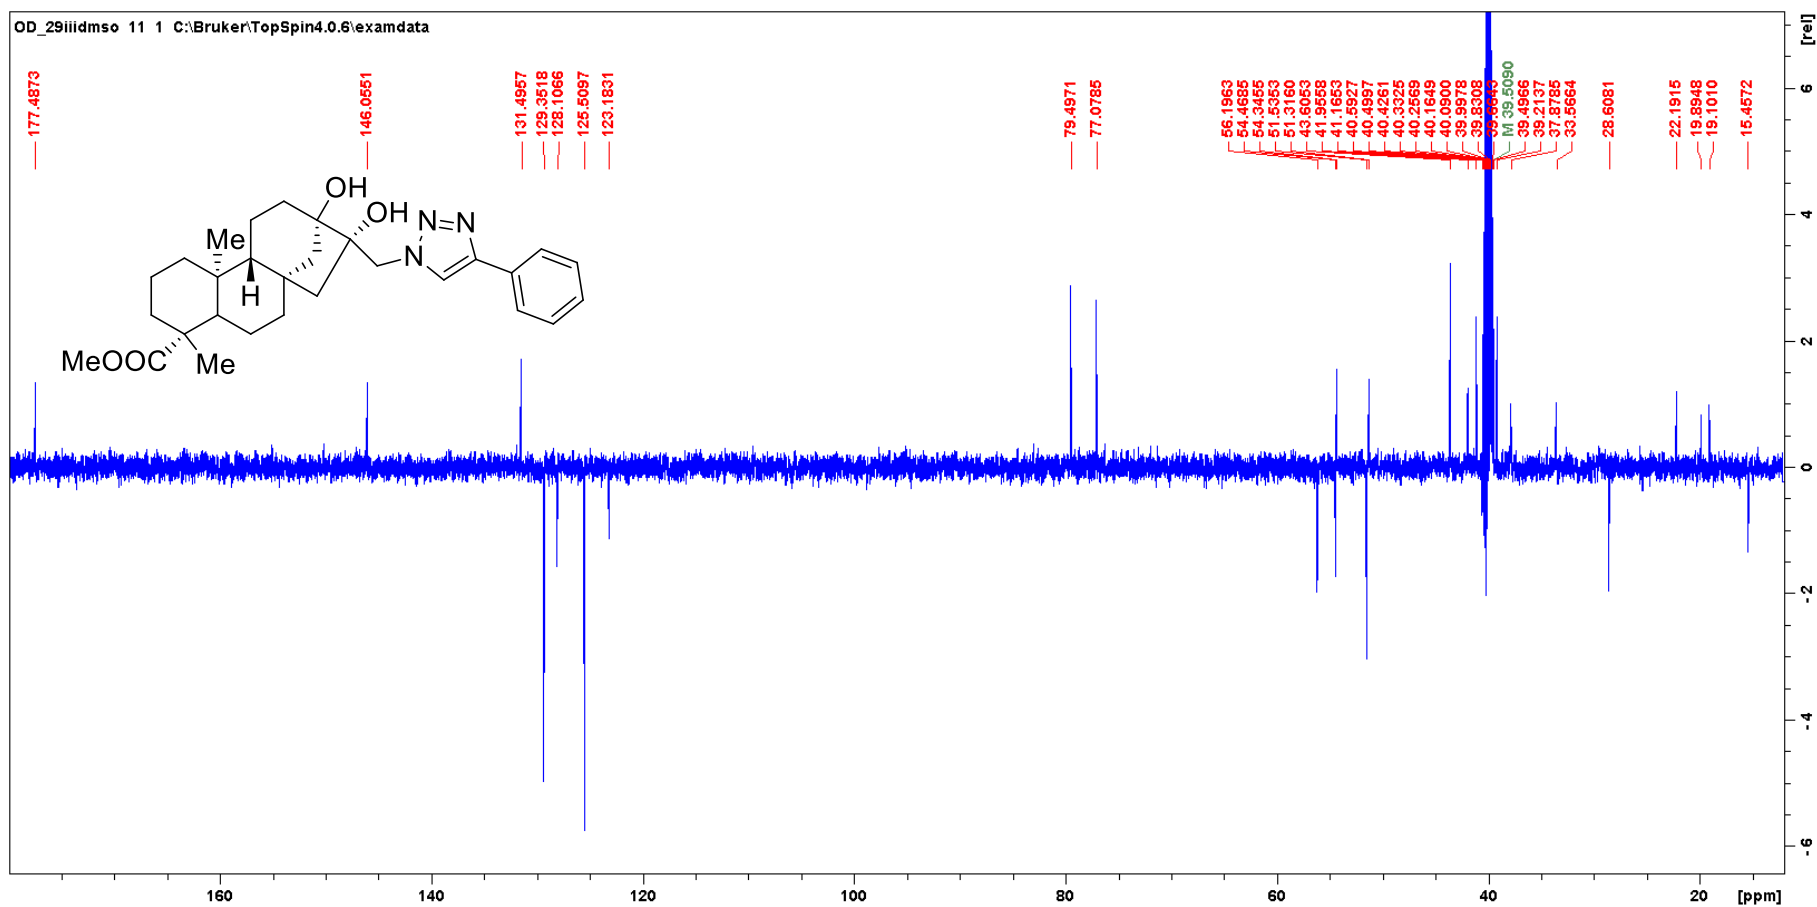



COSY of compound 7

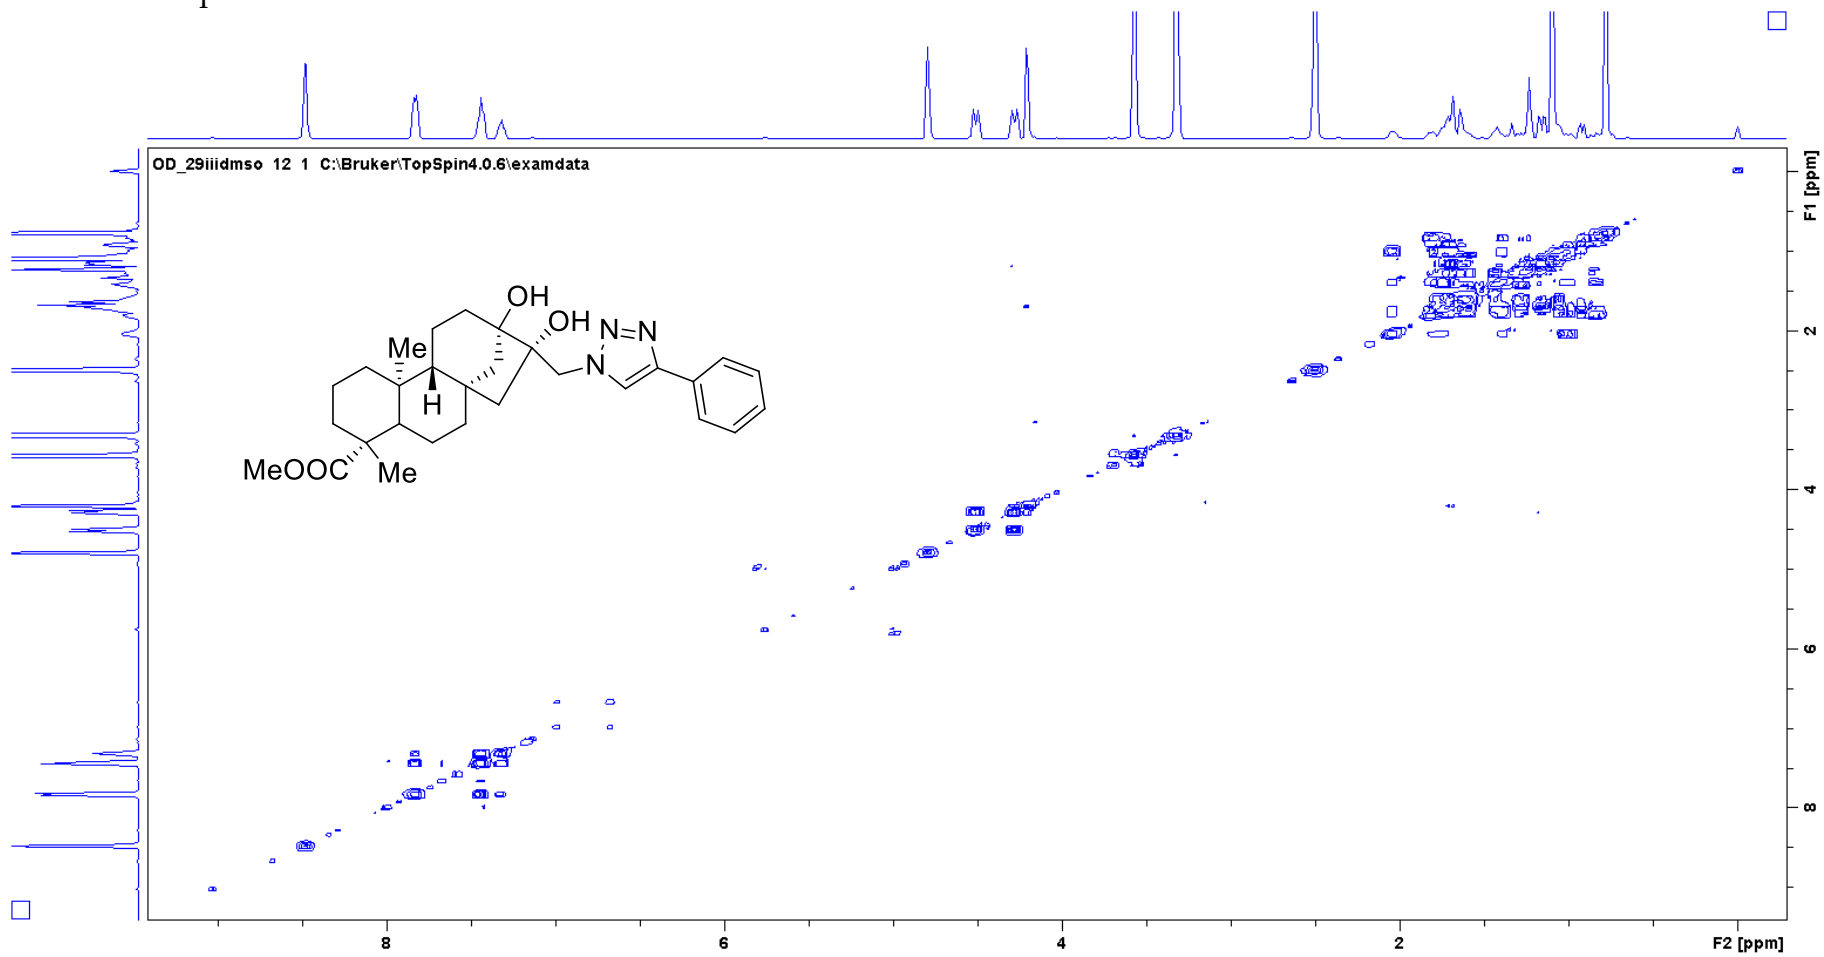

# HSQC of compound 7

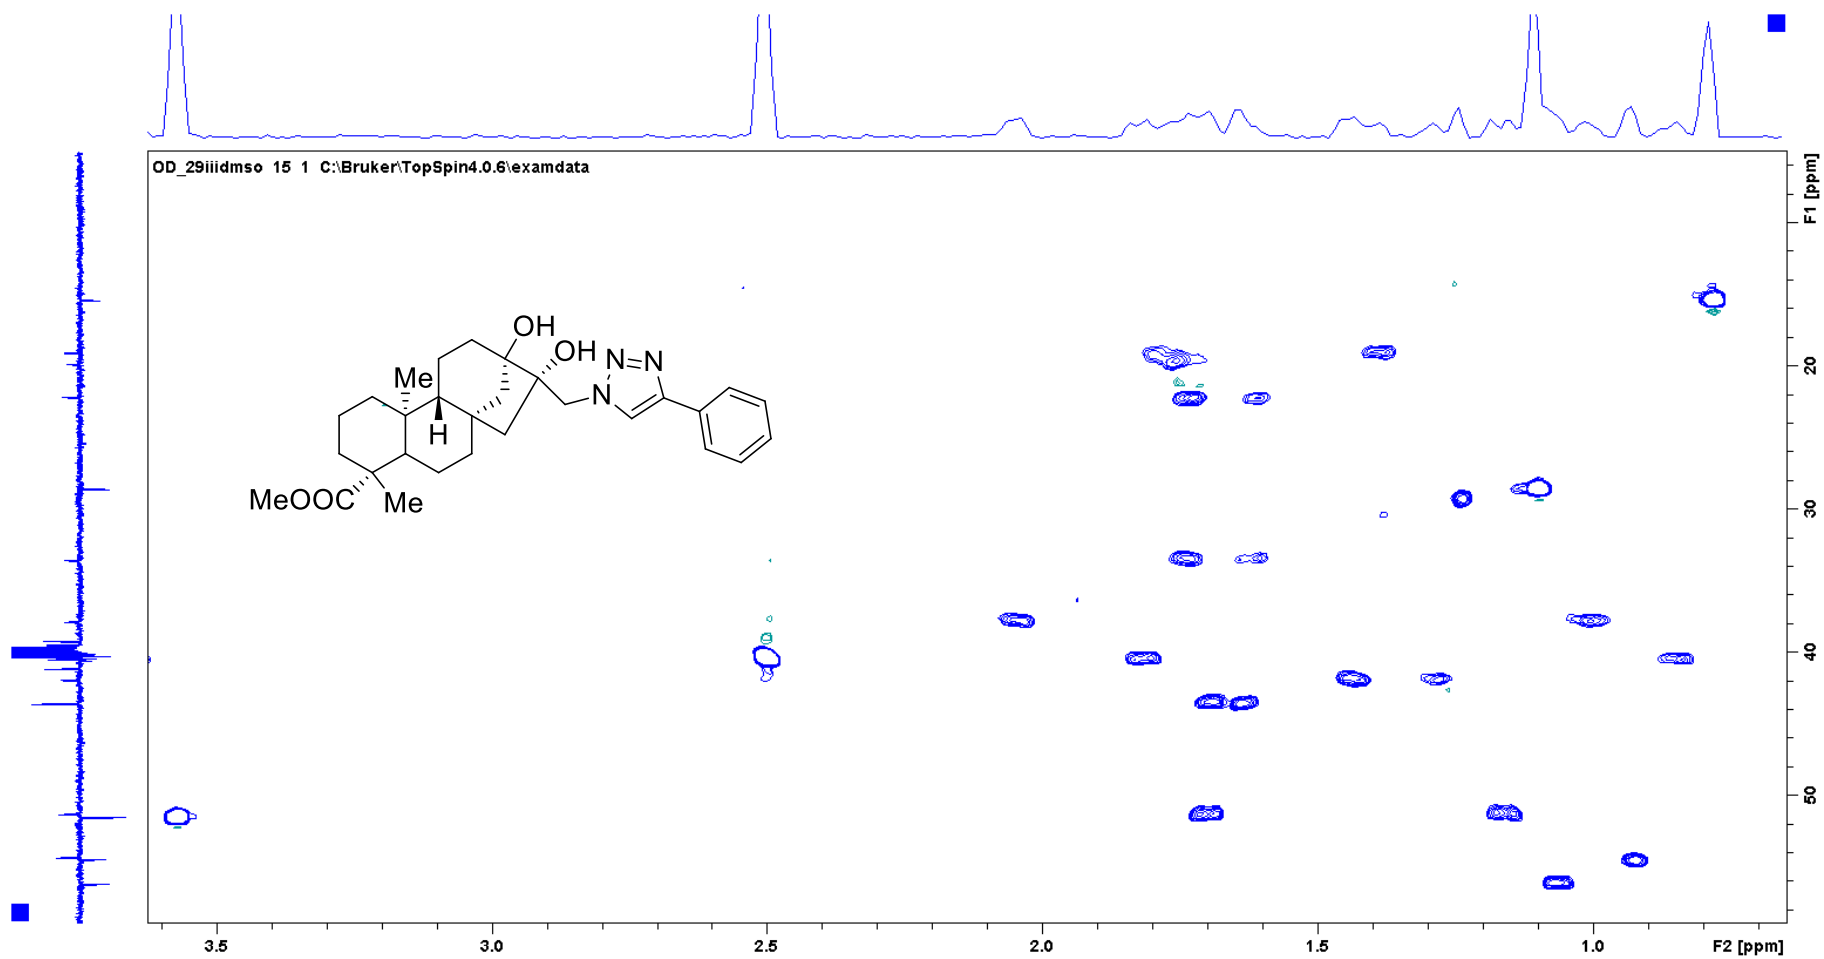

# HMBC of compound 7

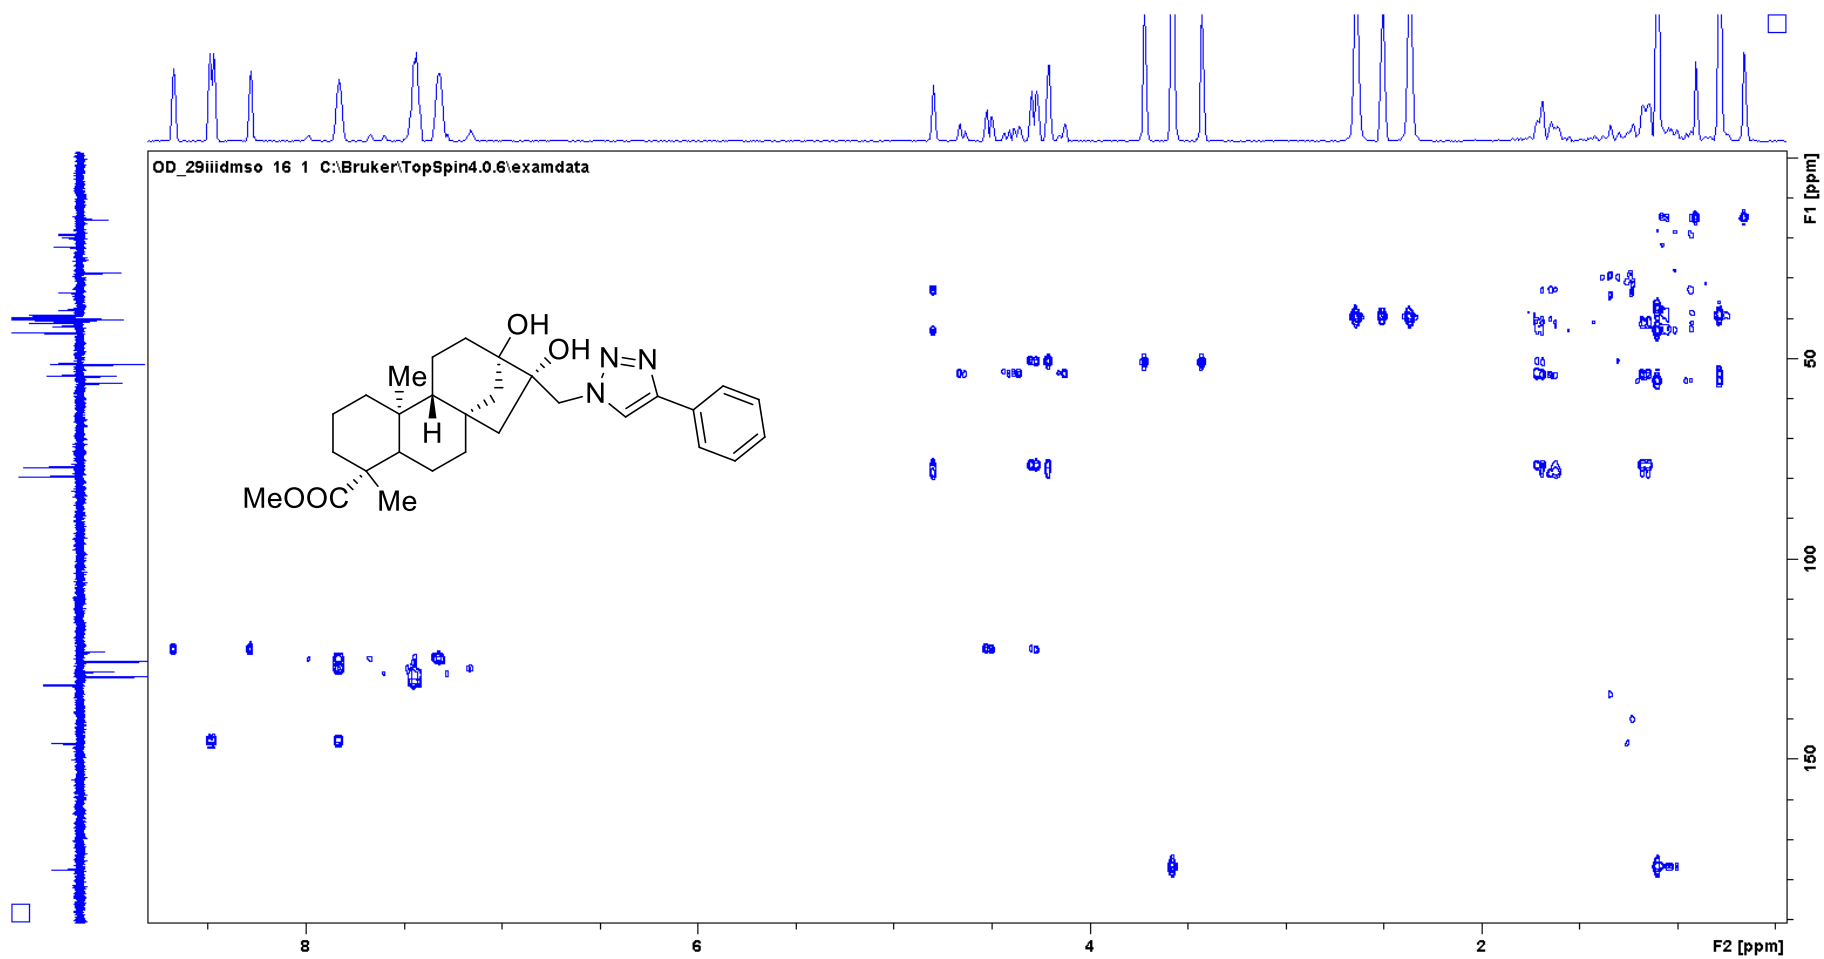

<sup>1</sup>H-NMR of compound 8

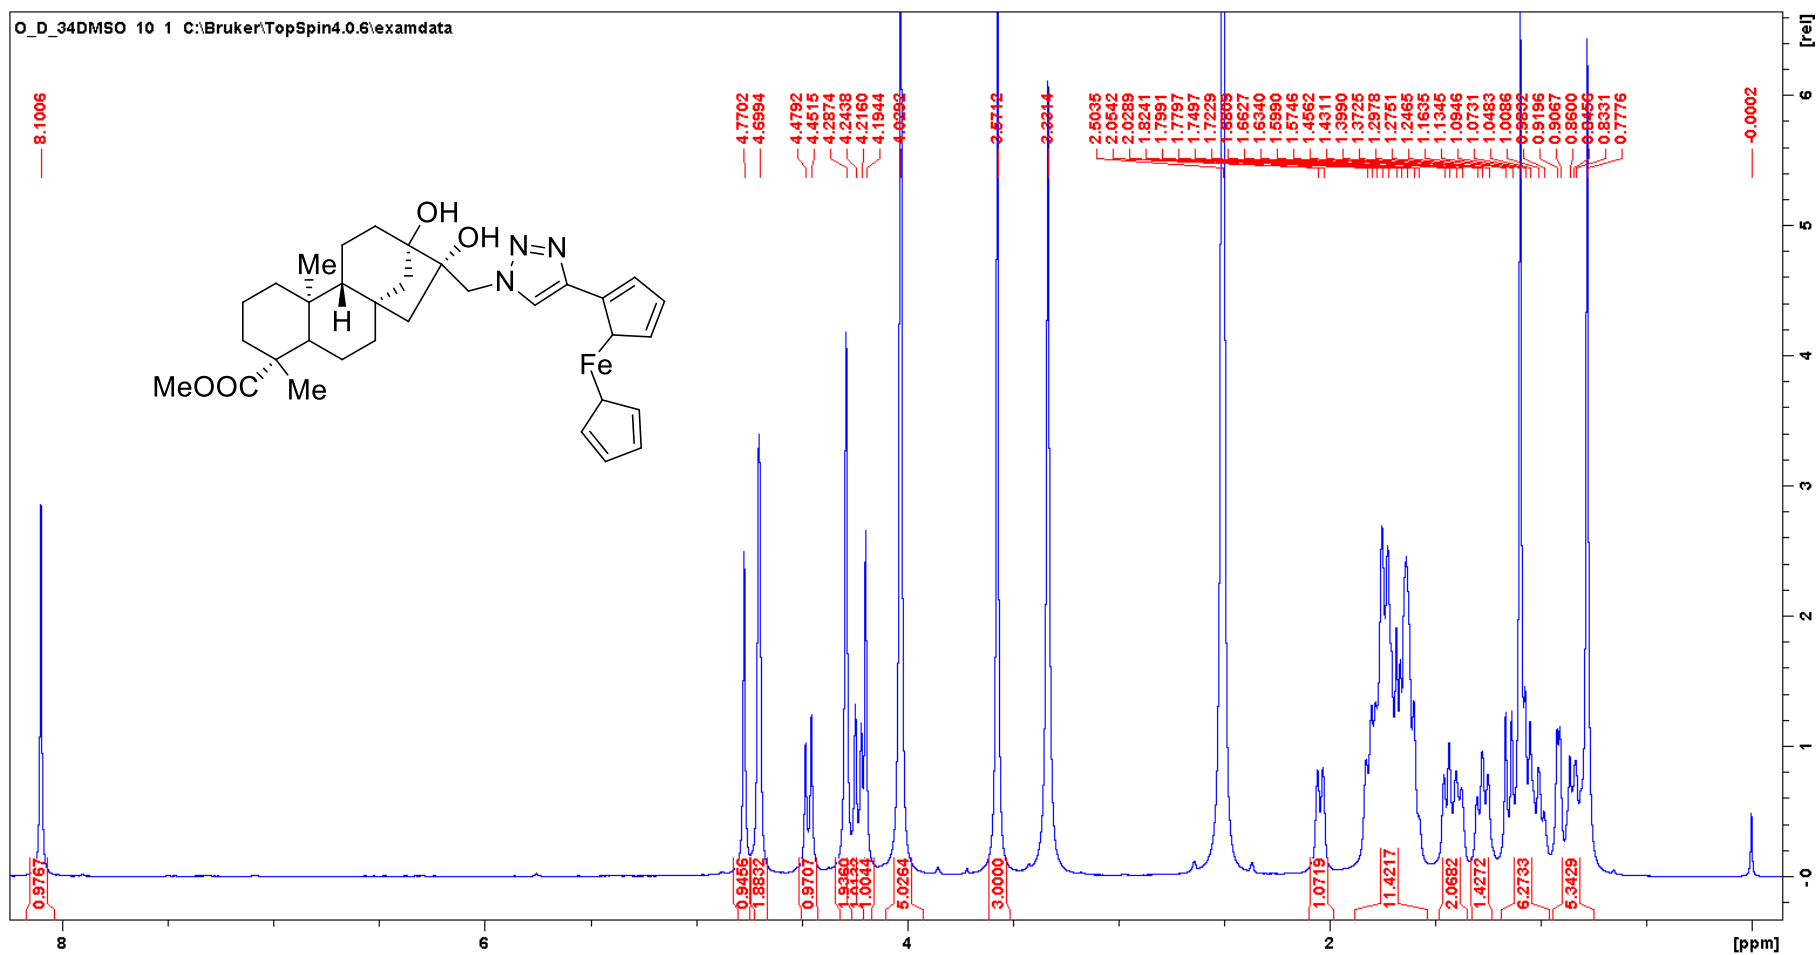

<sup>13</sup>C-NMR of compound 8

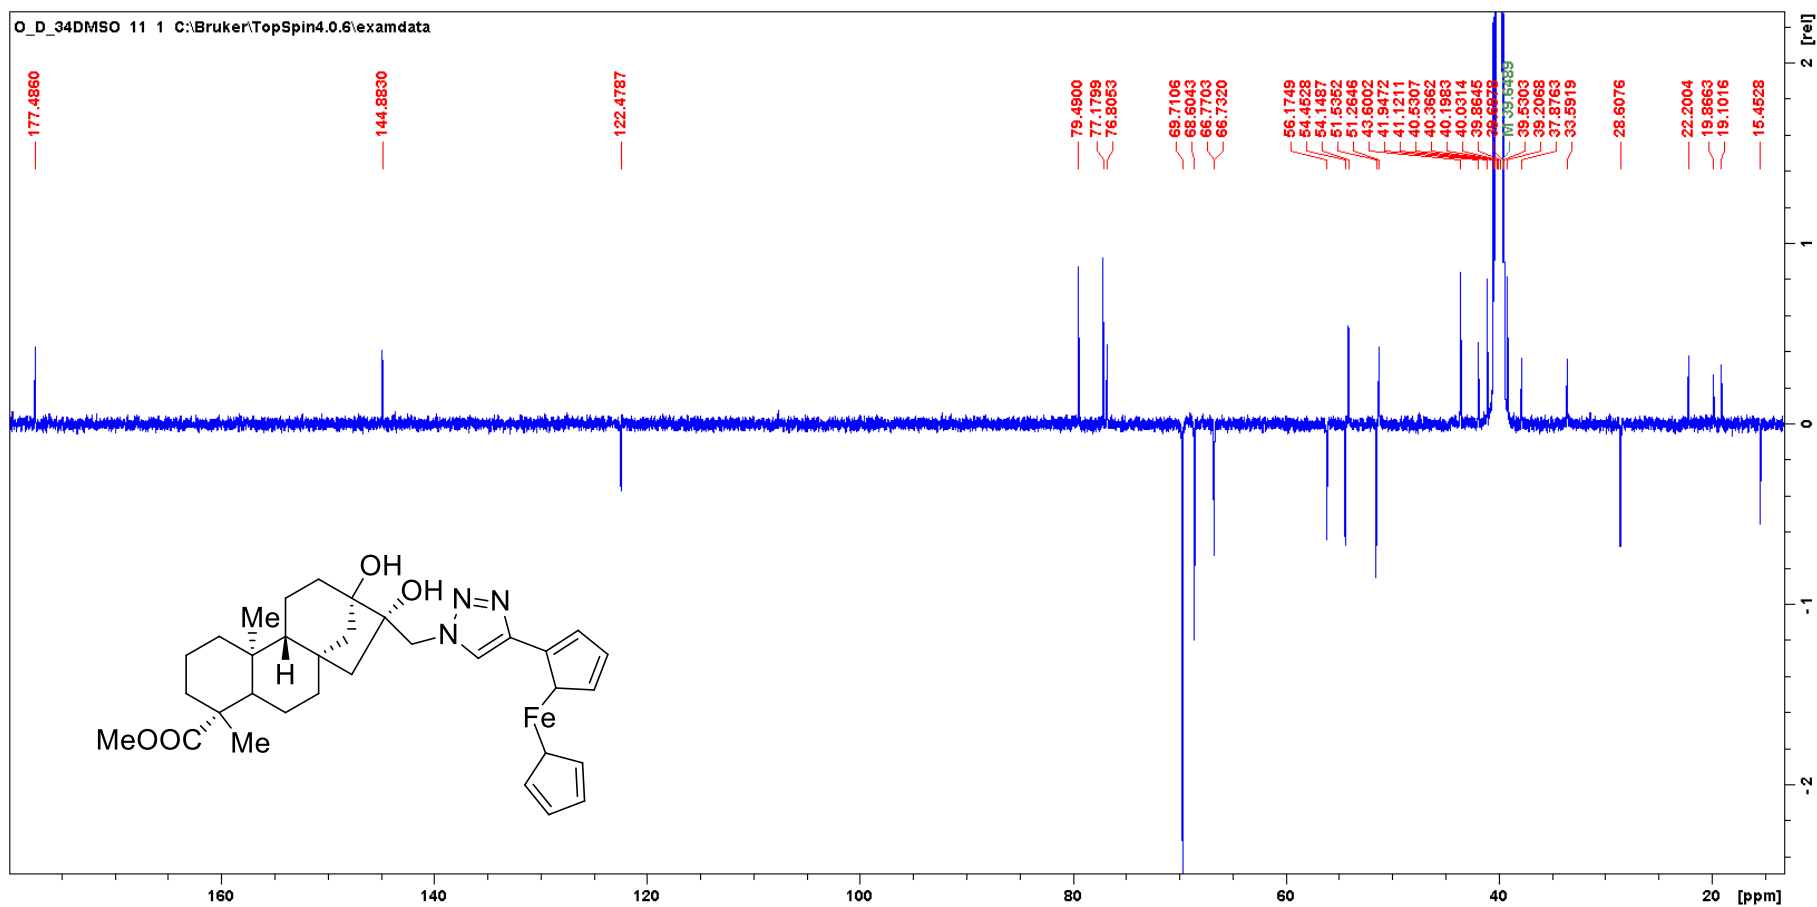

COSY of compound 8

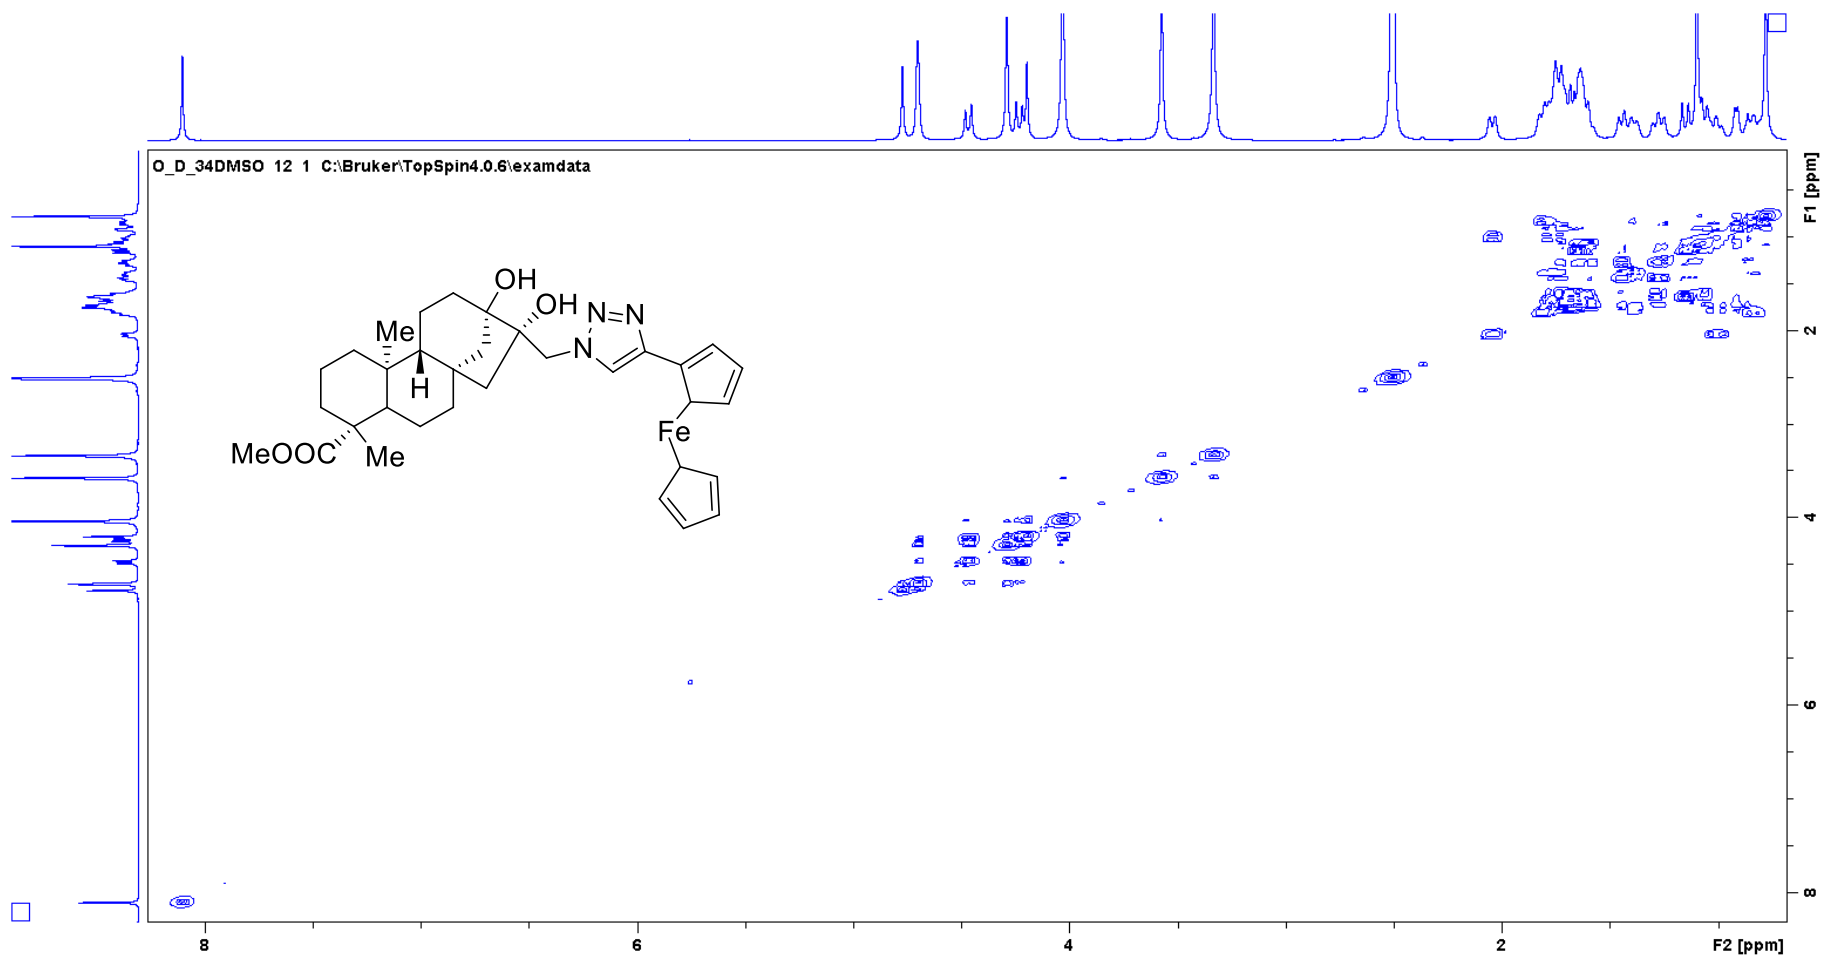

# HSQC of compound 8

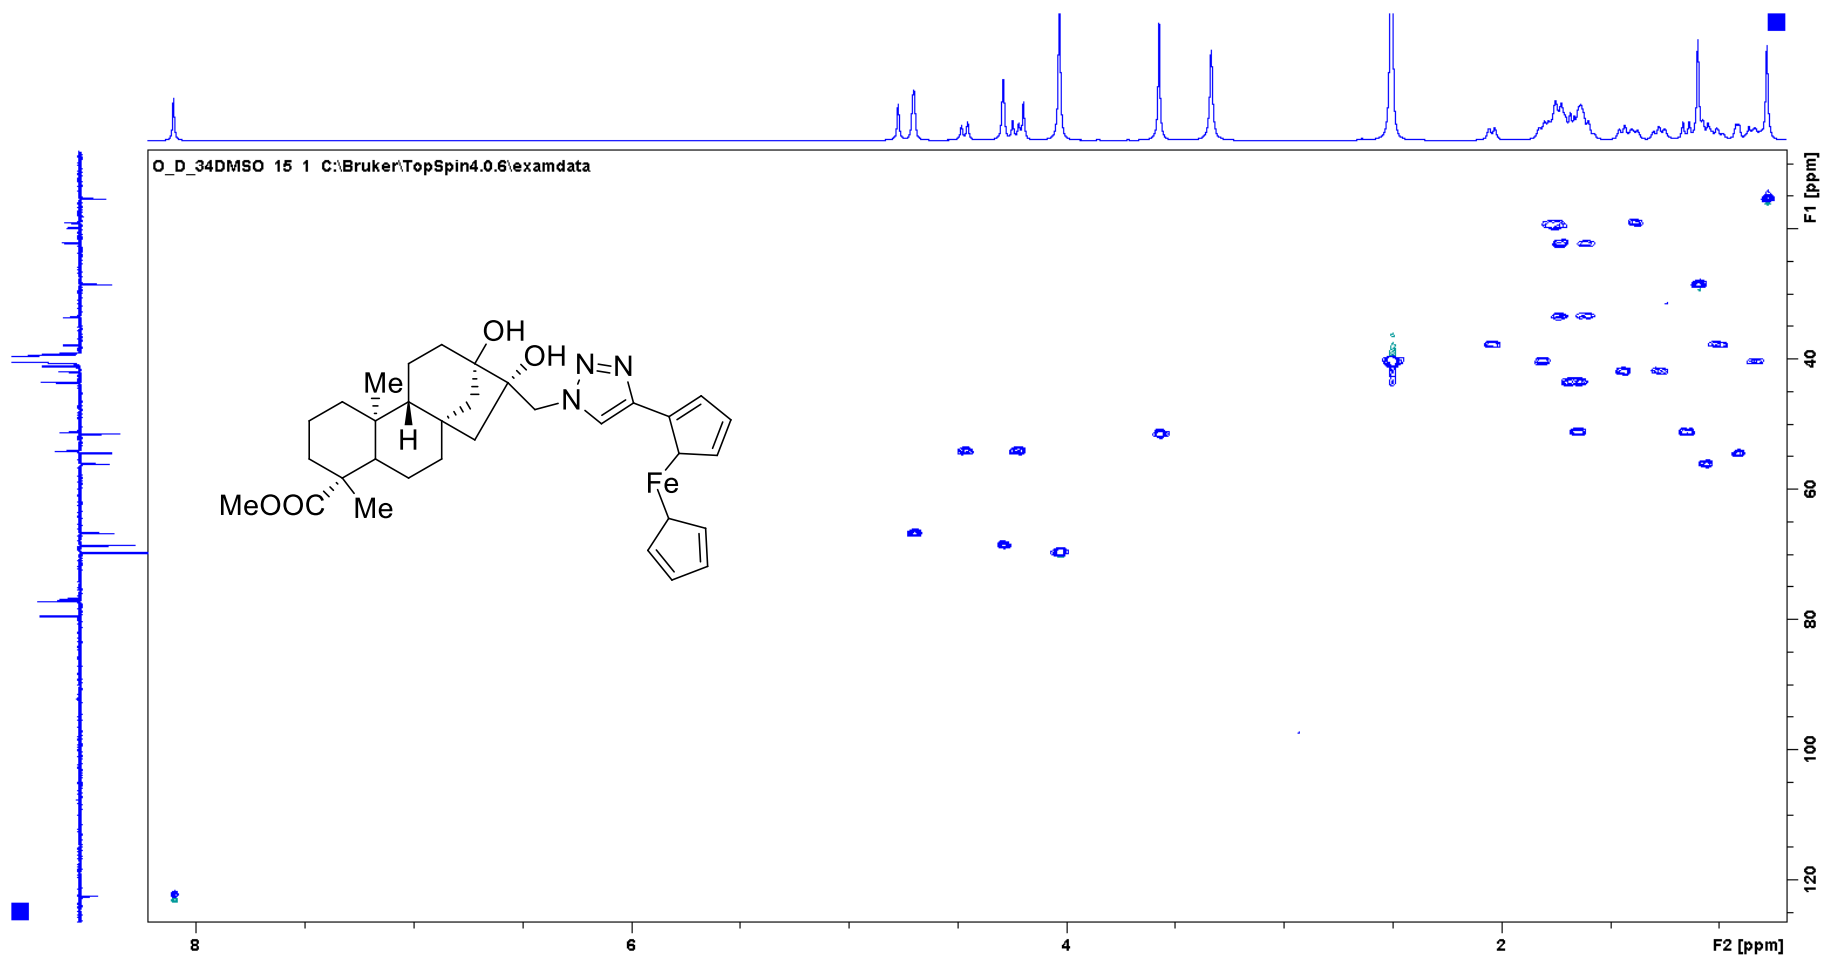

# HMBC of compound 8

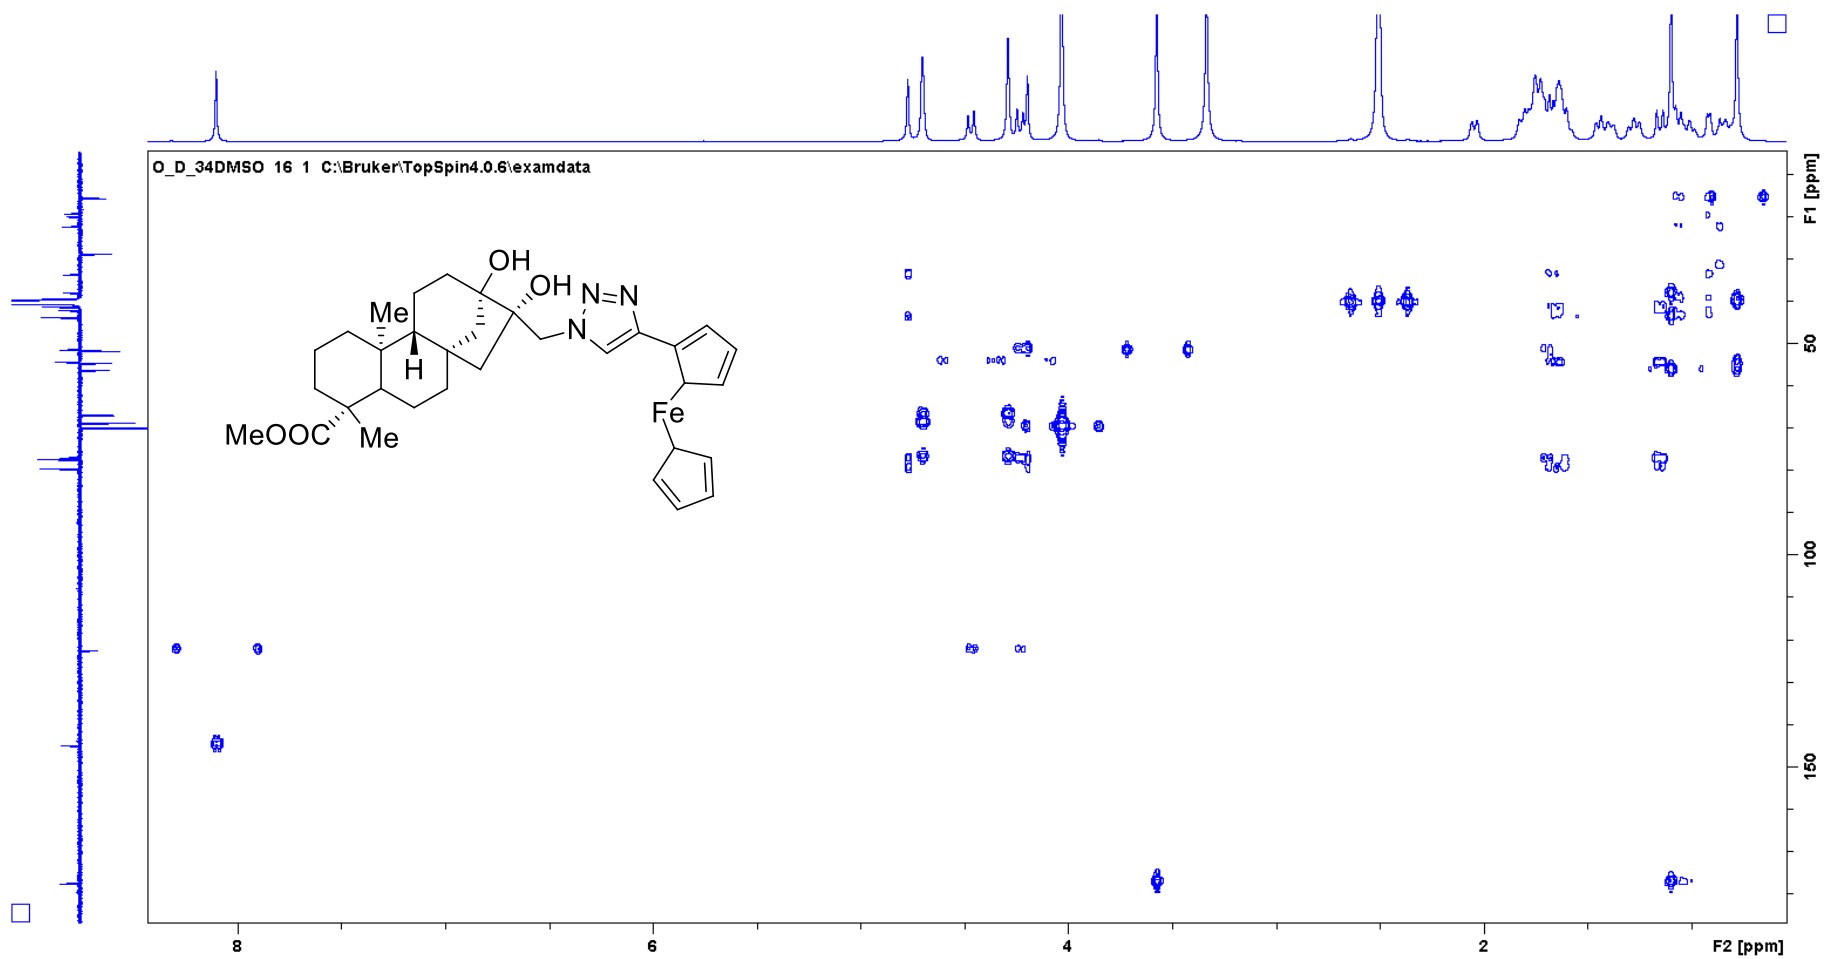



# <sup>1</sup>H-NMR of compound 9

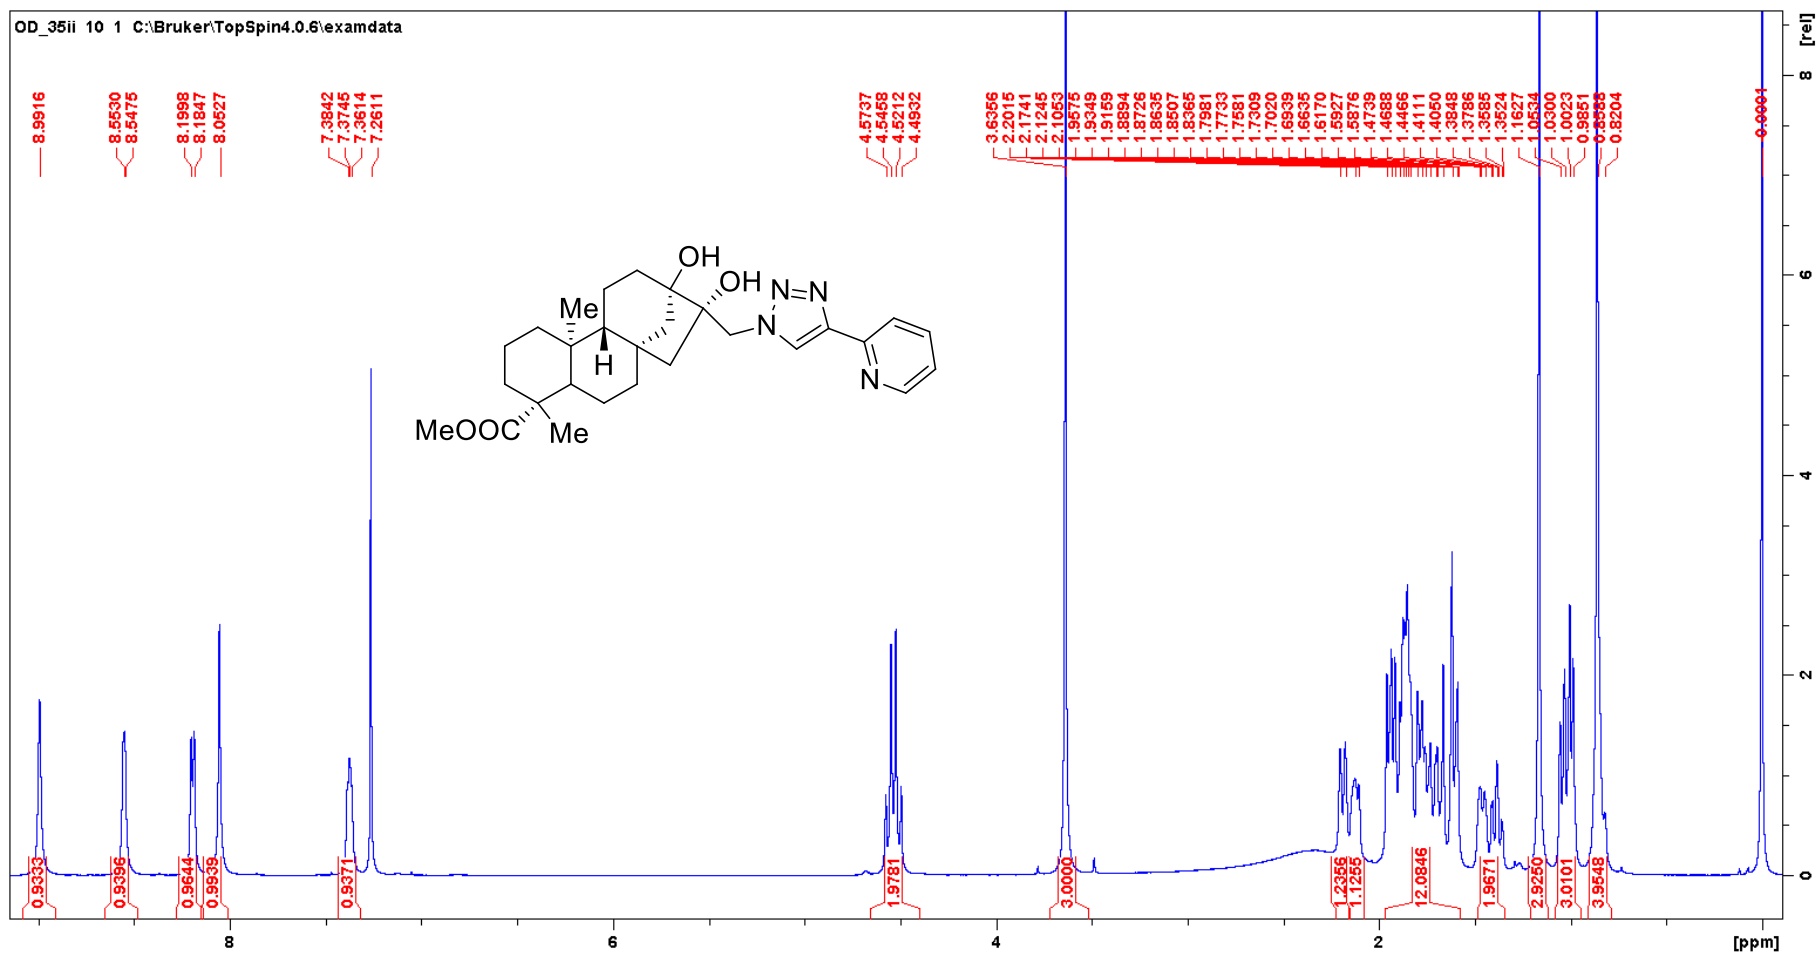

<sup>13</sup>C-NMR of compound 9

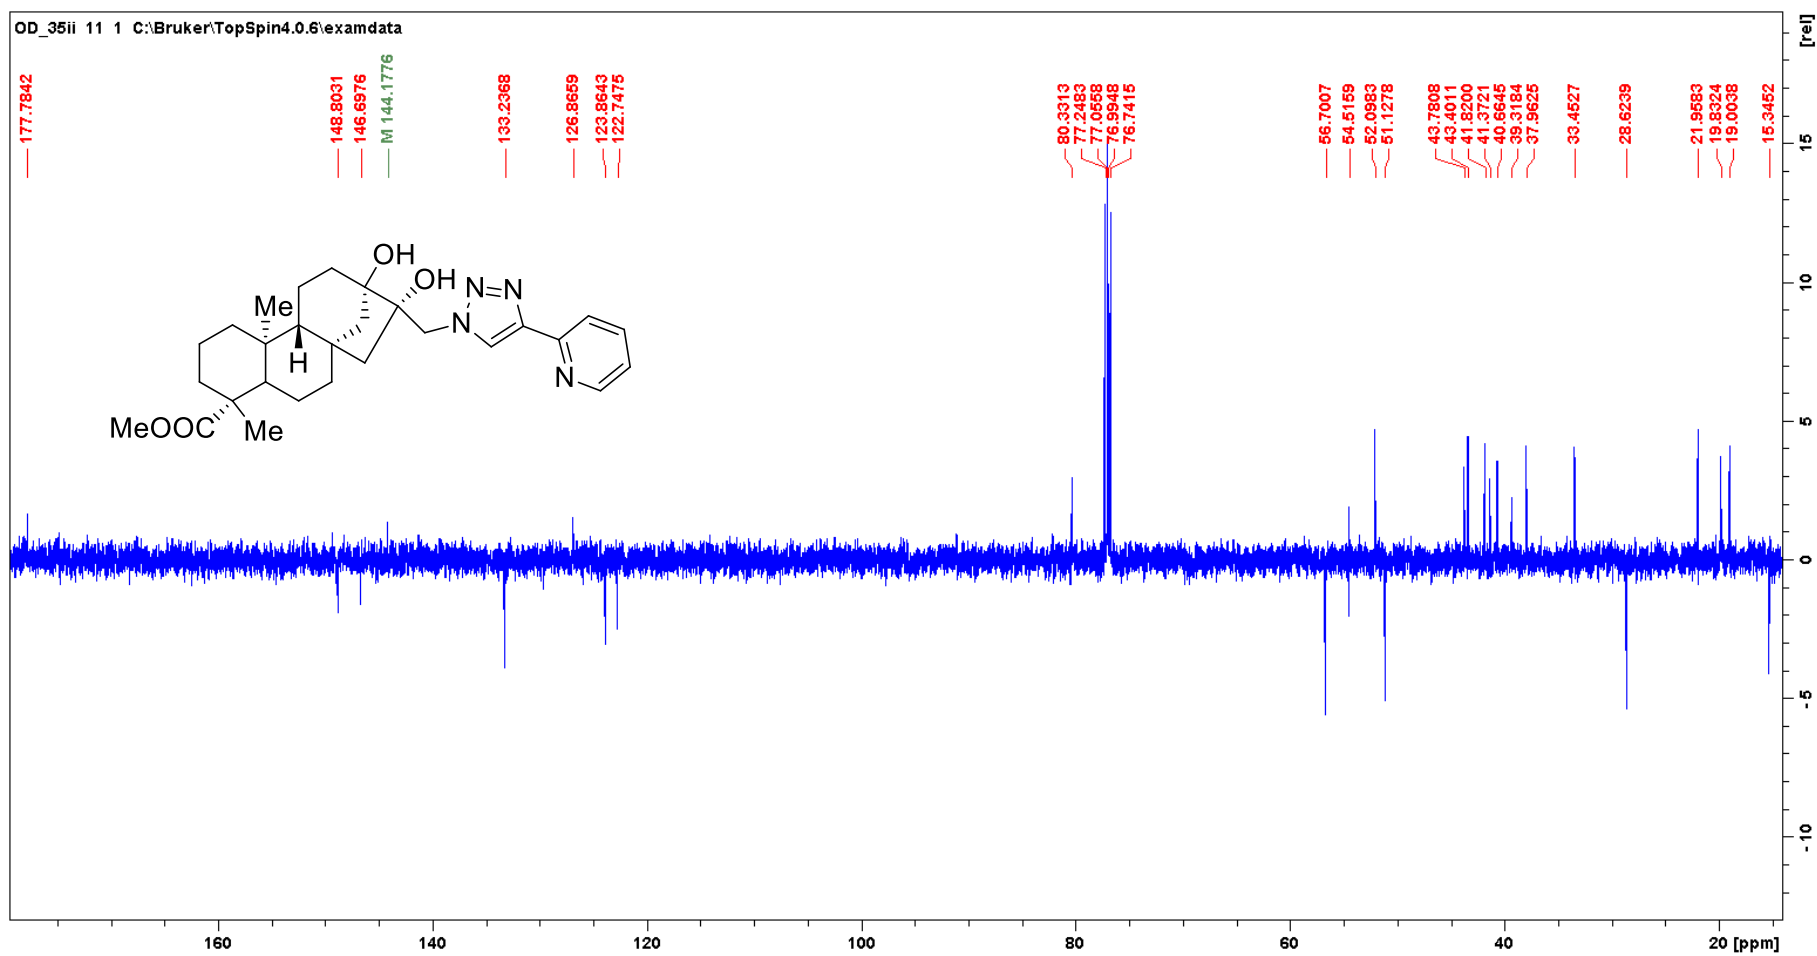

COSY of compound 9

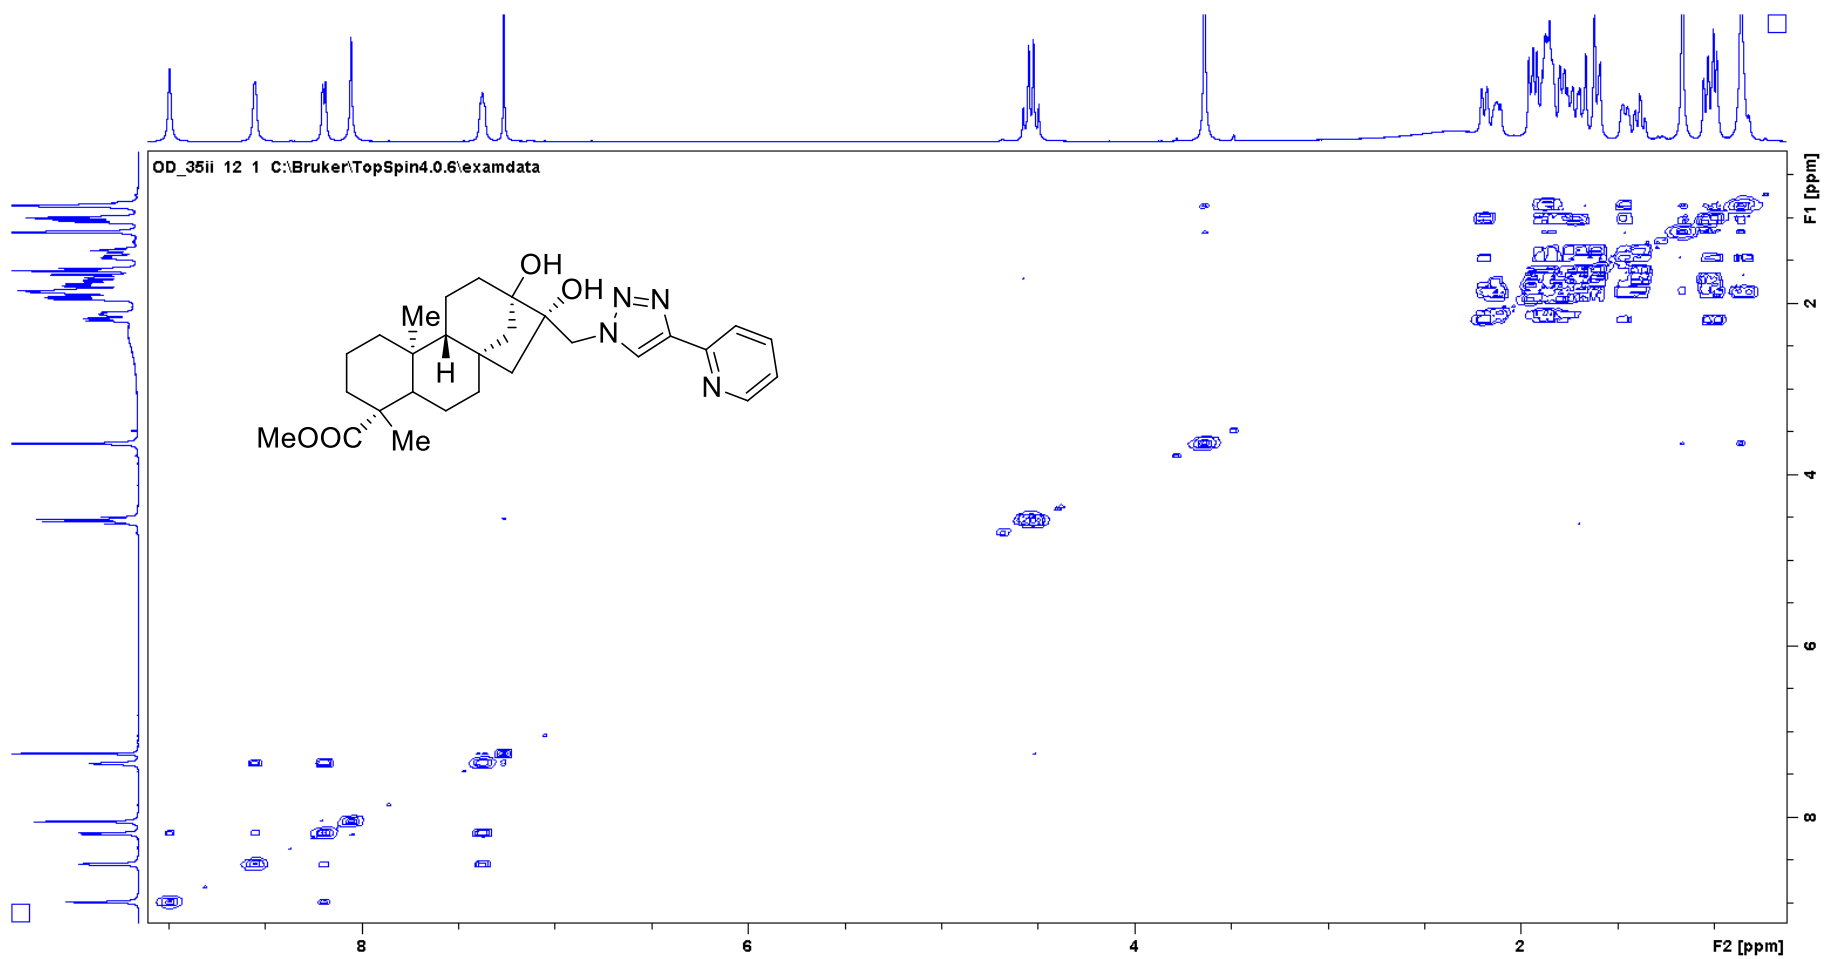

HSQC of compound 9

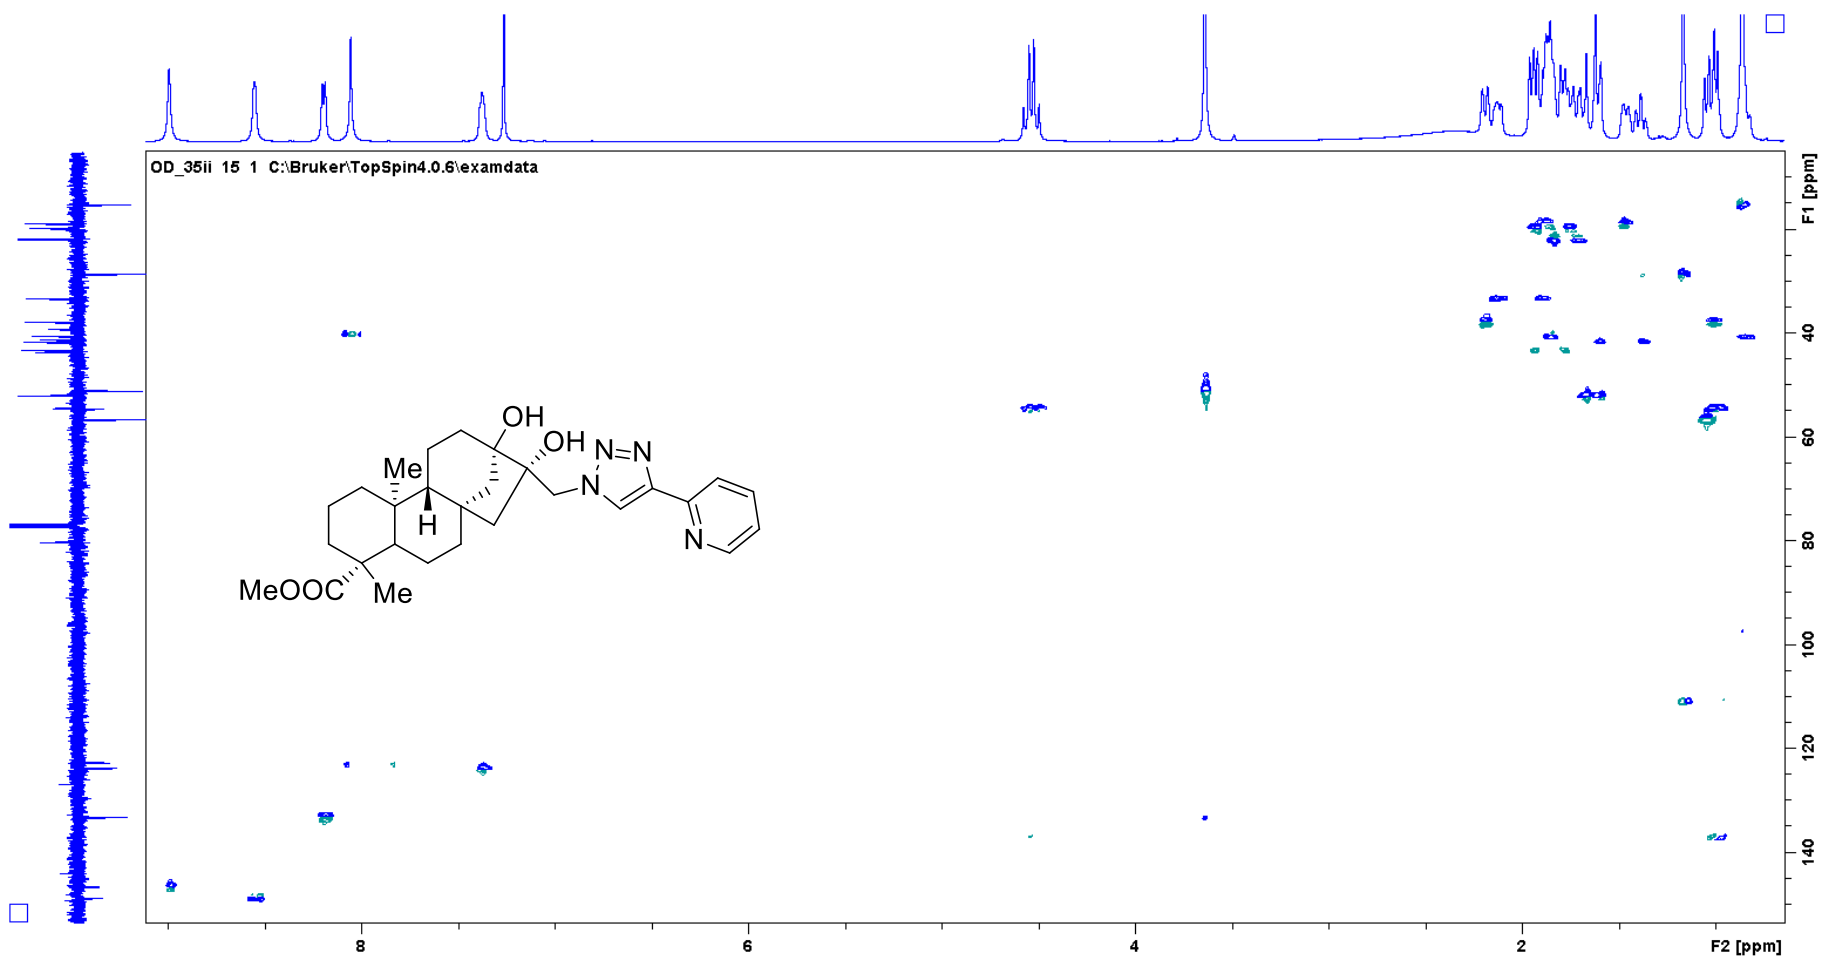

HMBC of compound 9

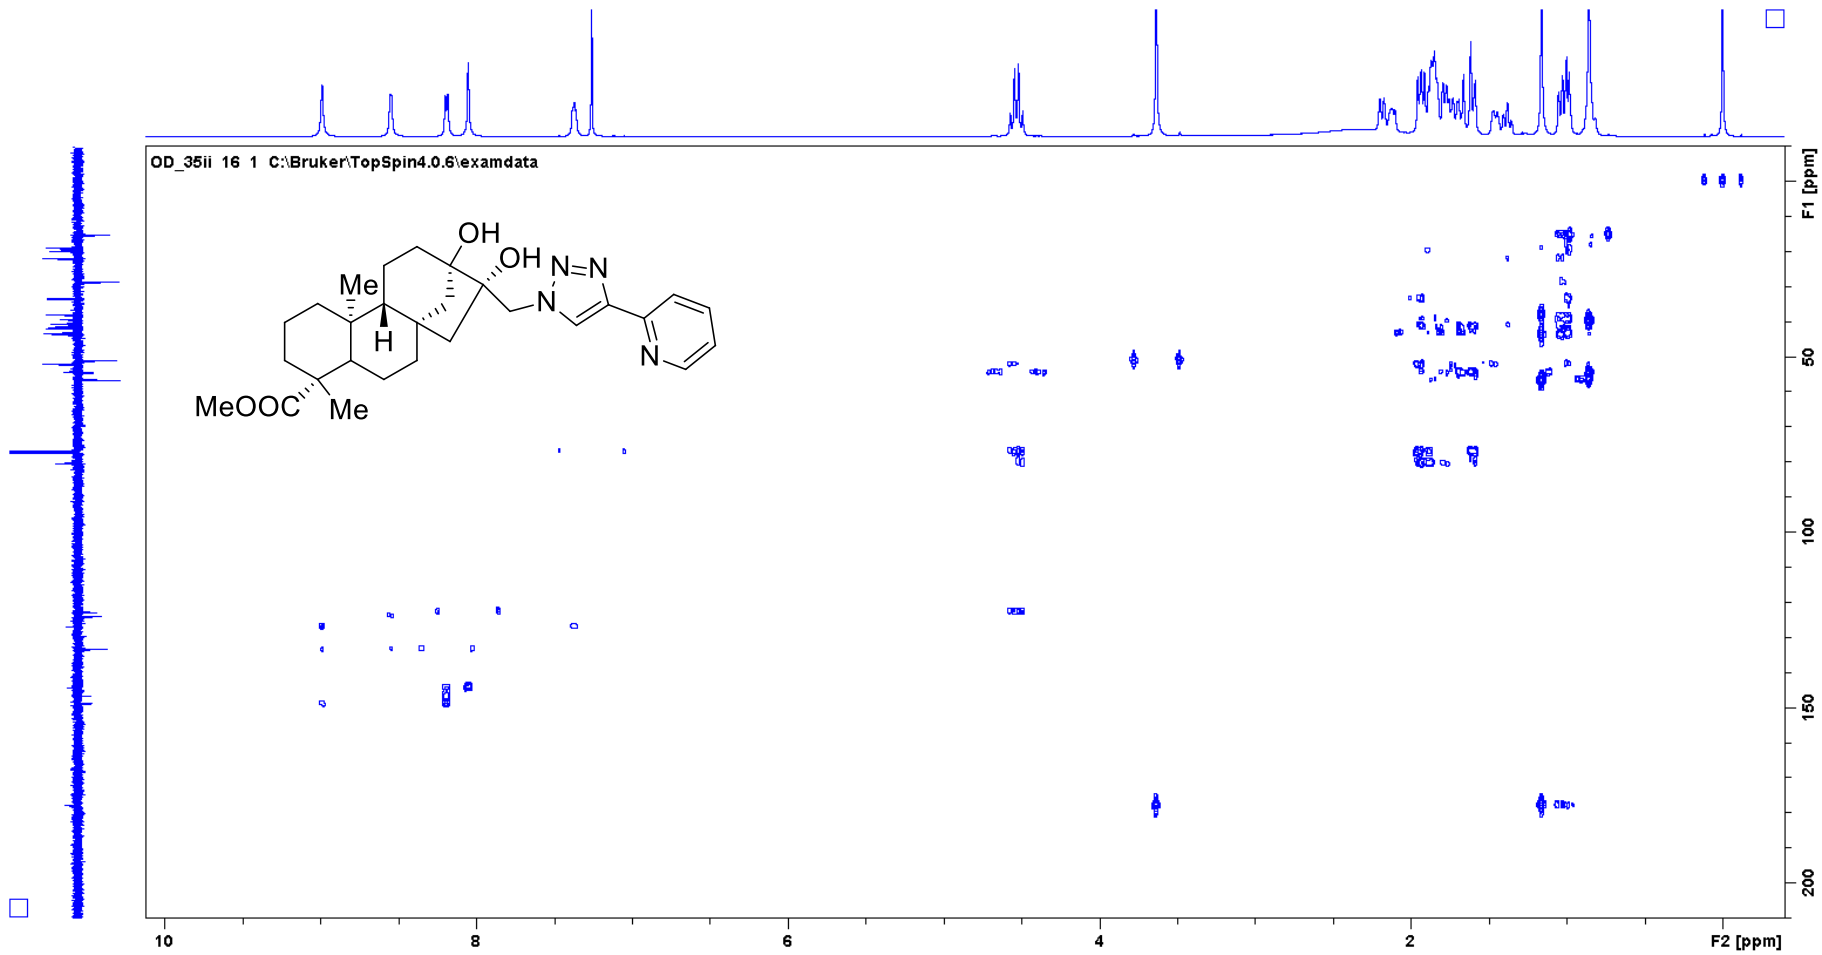

<sup>1</sup>H-NMR of compound 10

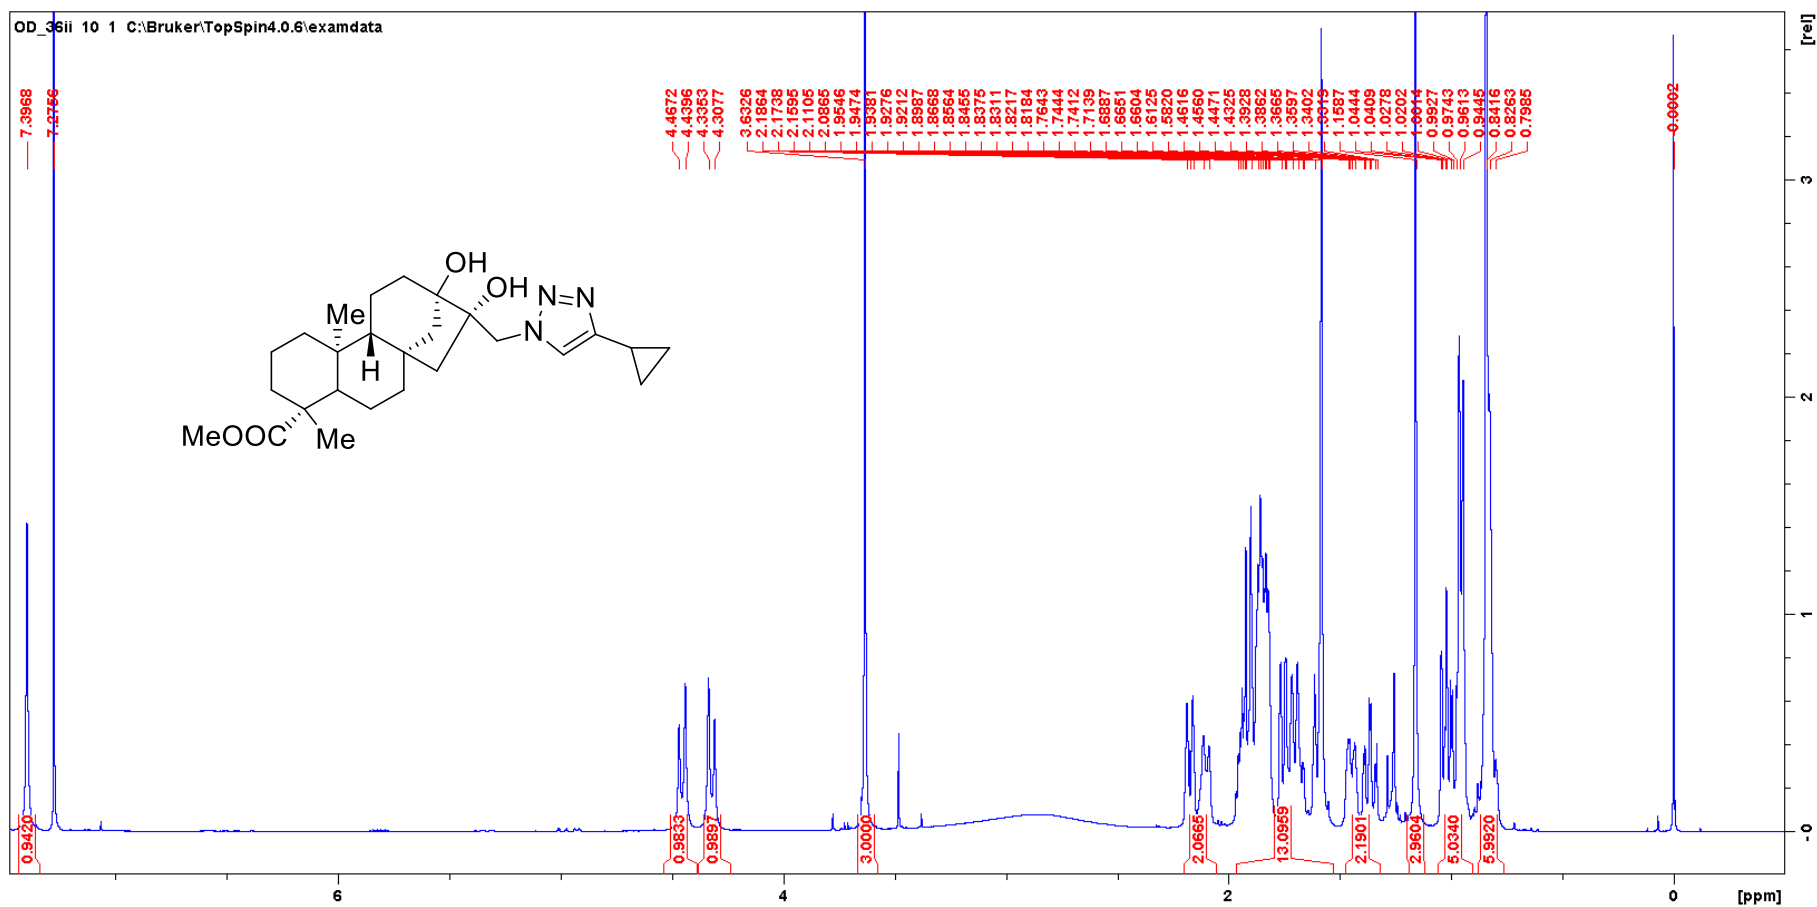

<sup>13</sup>C-NMR of compound 10

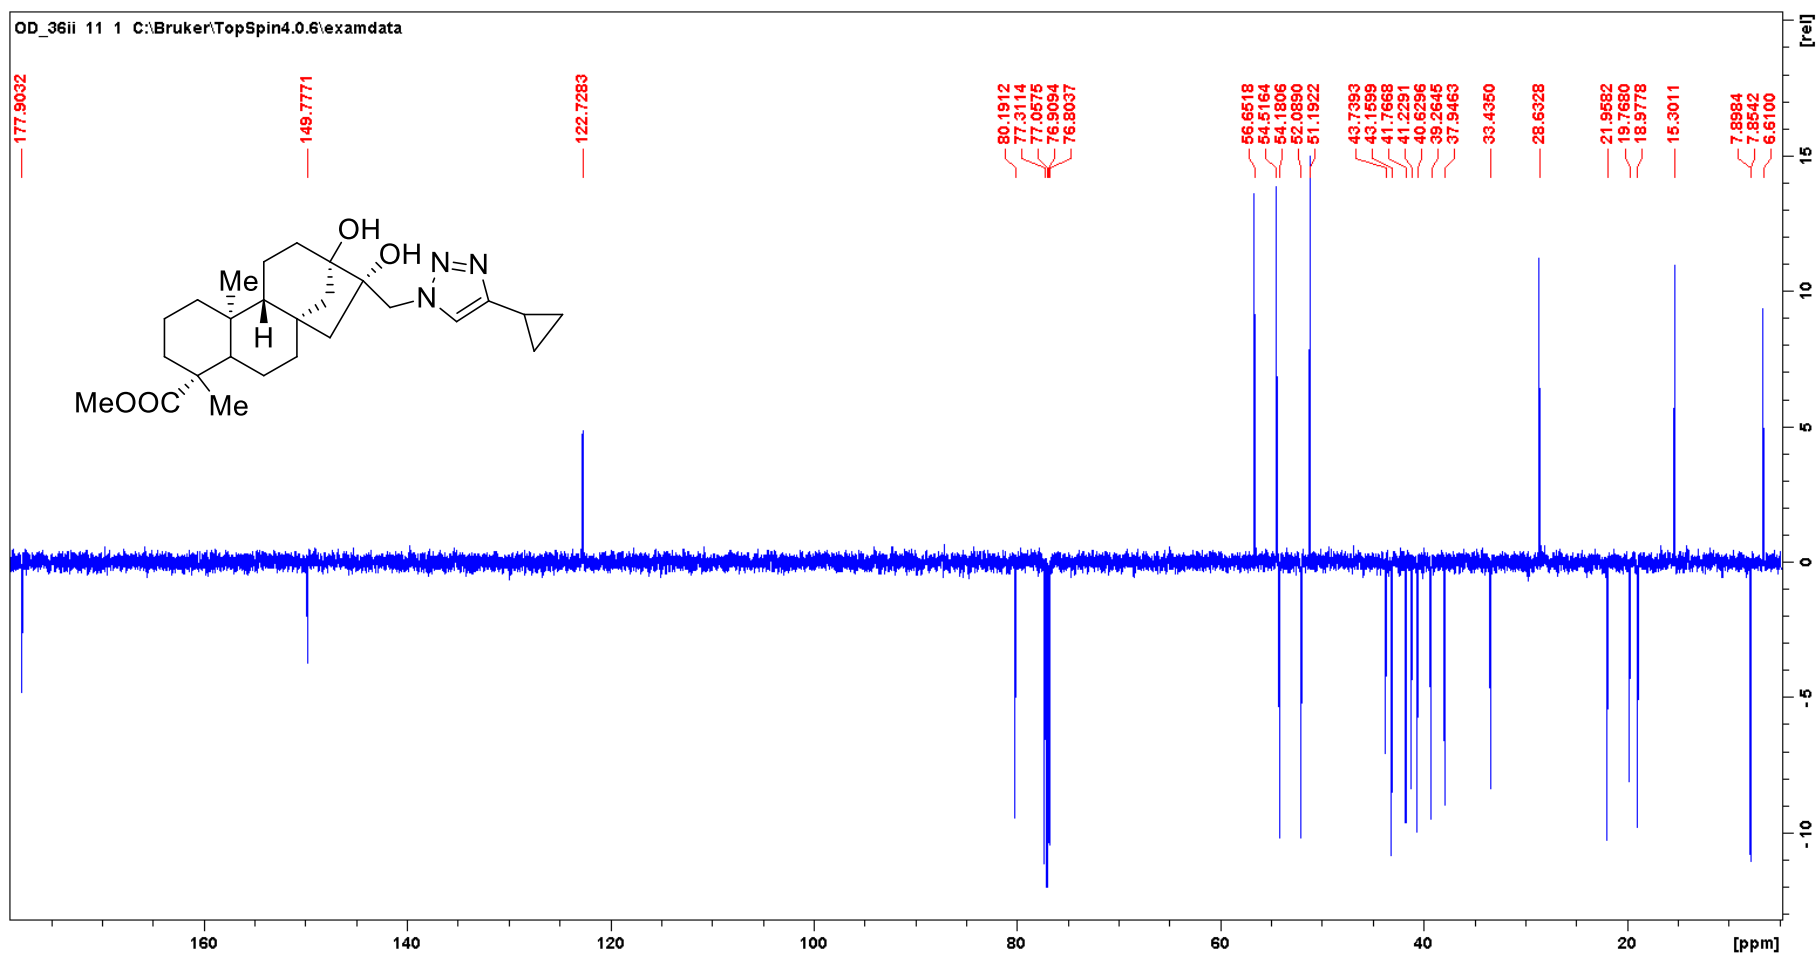

COSY of compound 10

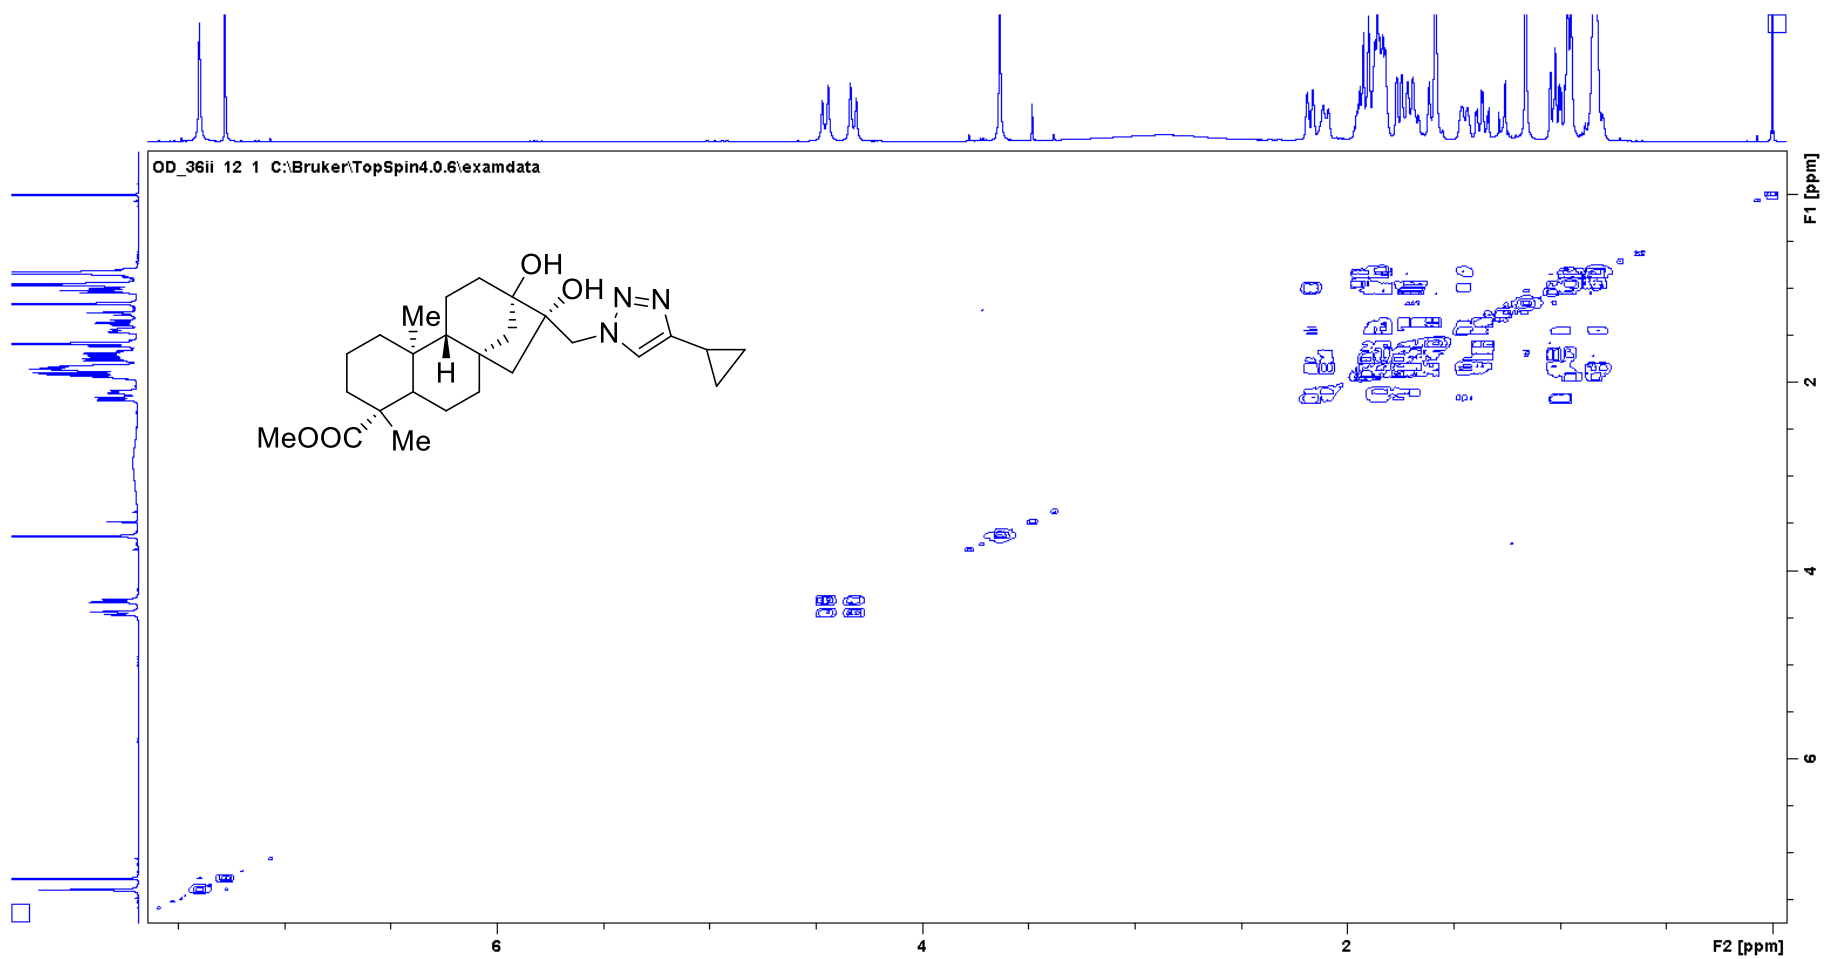



# HSQC of compound 10

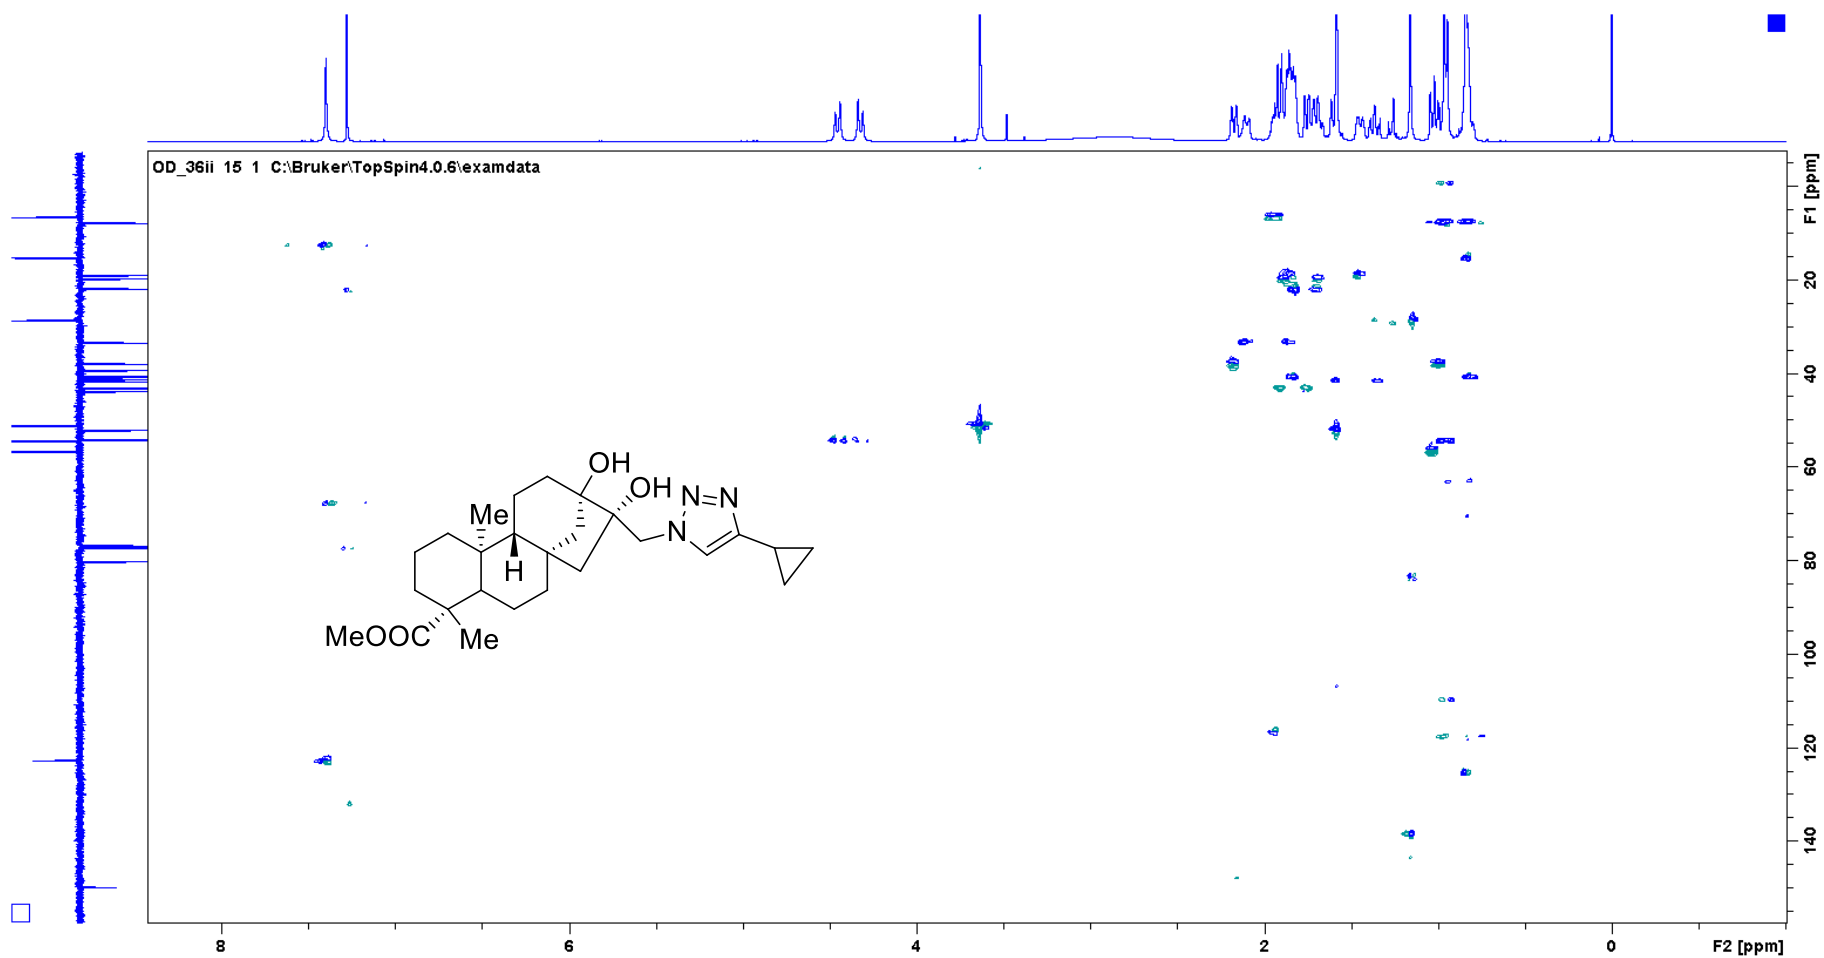

# HMBC of compound 10

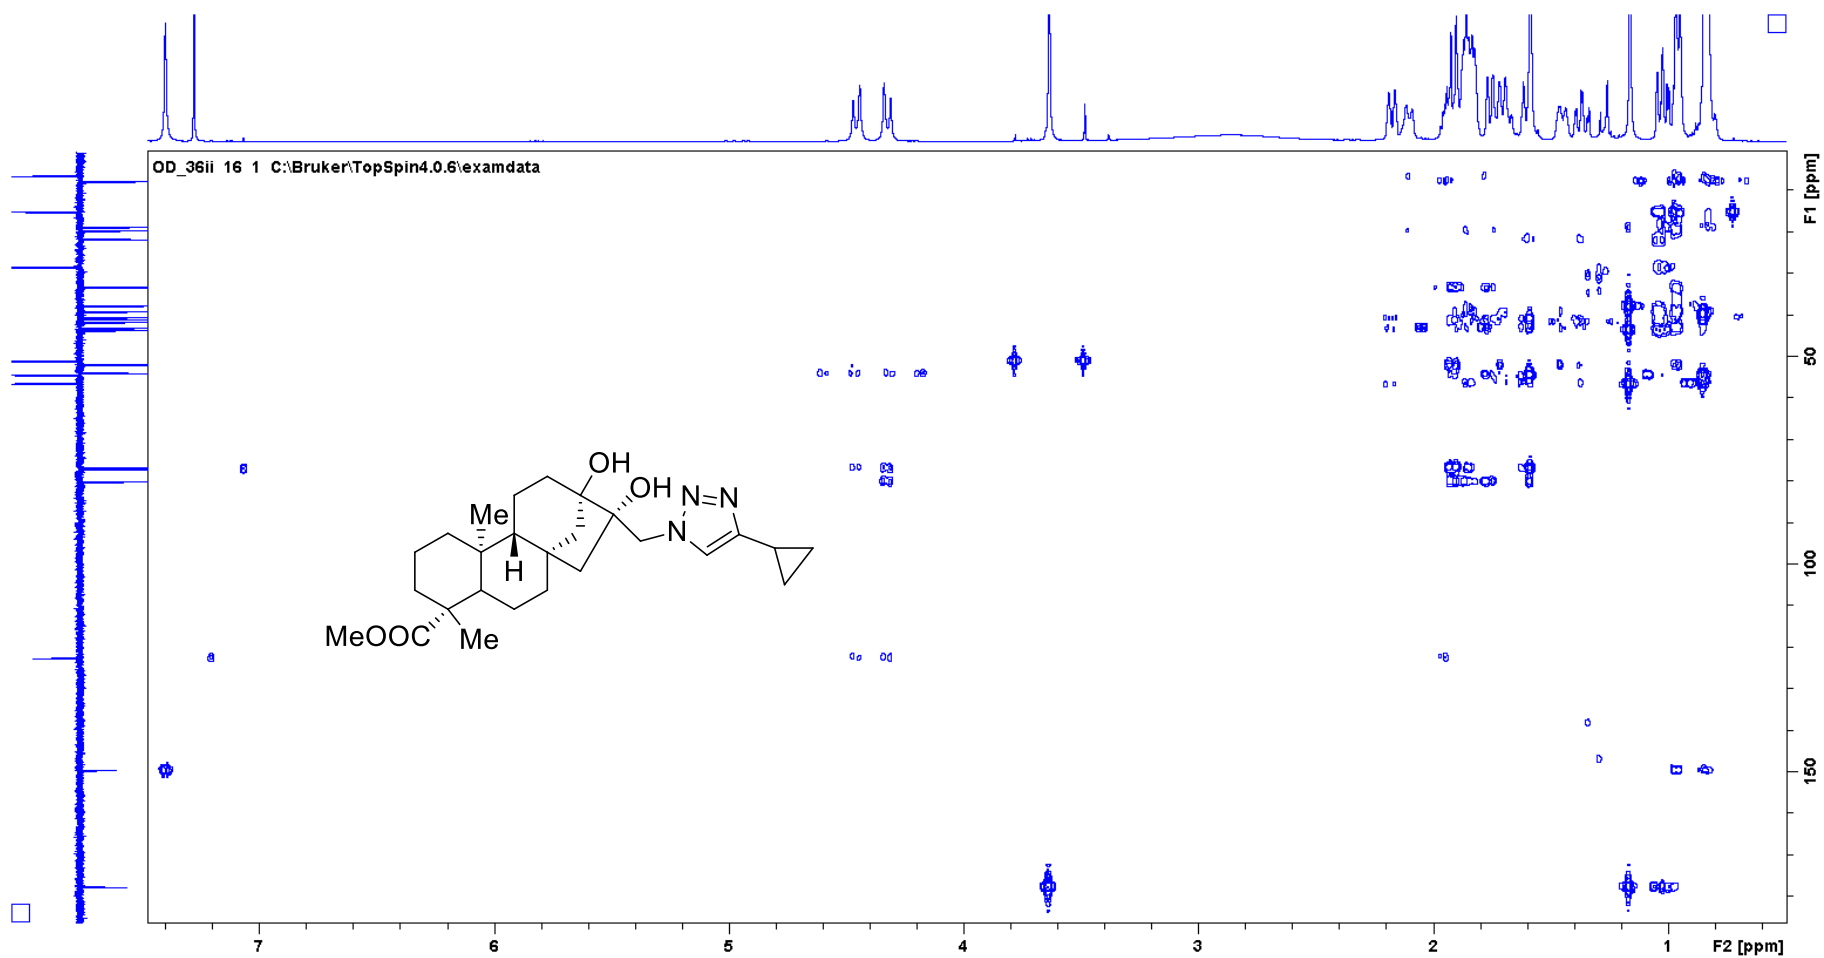

# <sup>1</sup>H-NMR of compound 11

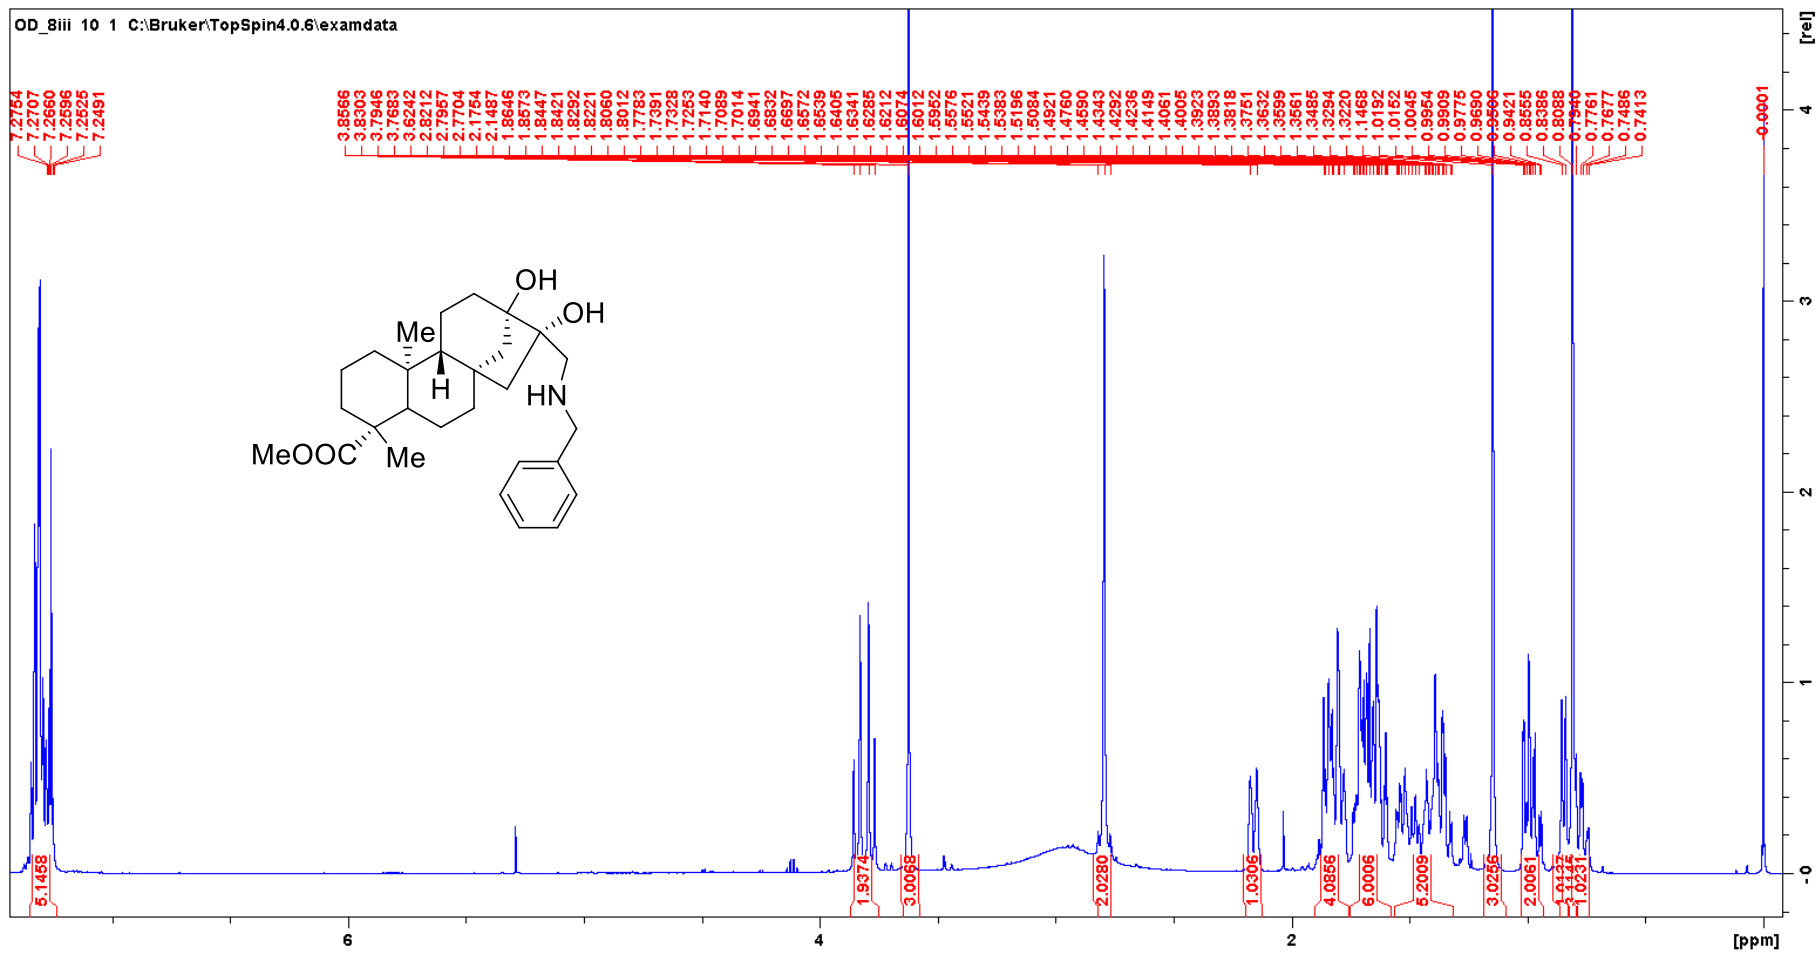

<sup>13</sup>C-NMR of compound 11

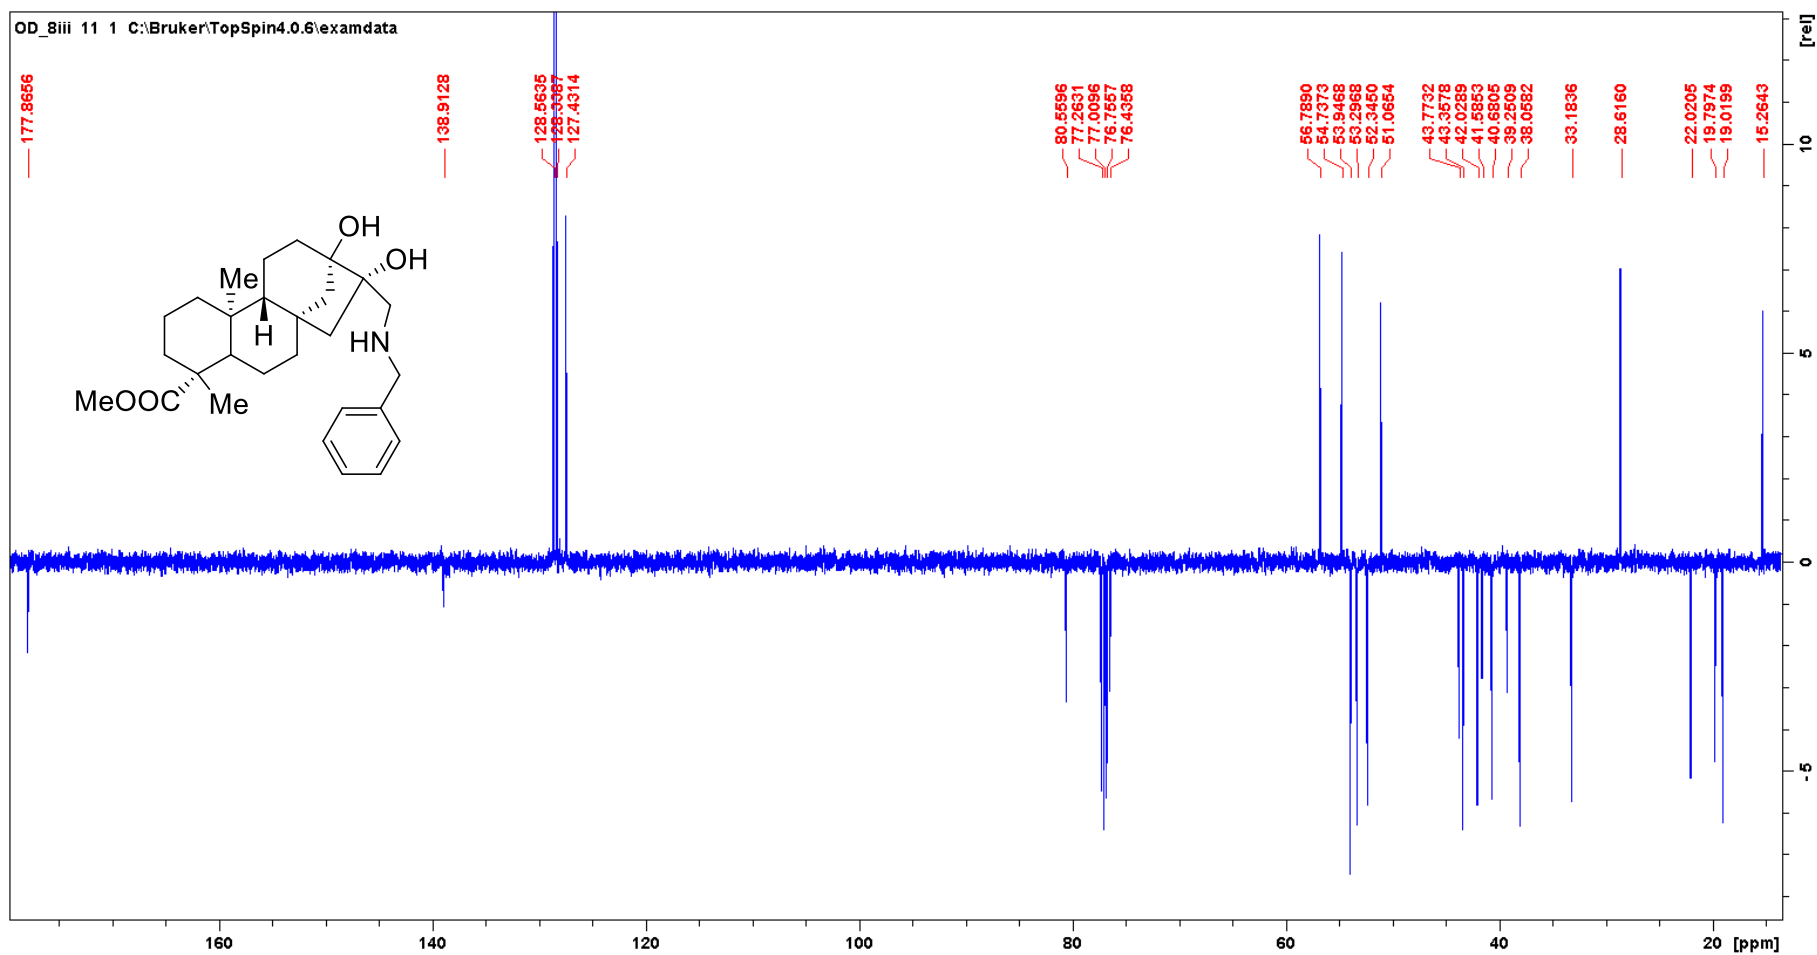

COSY of compound 11

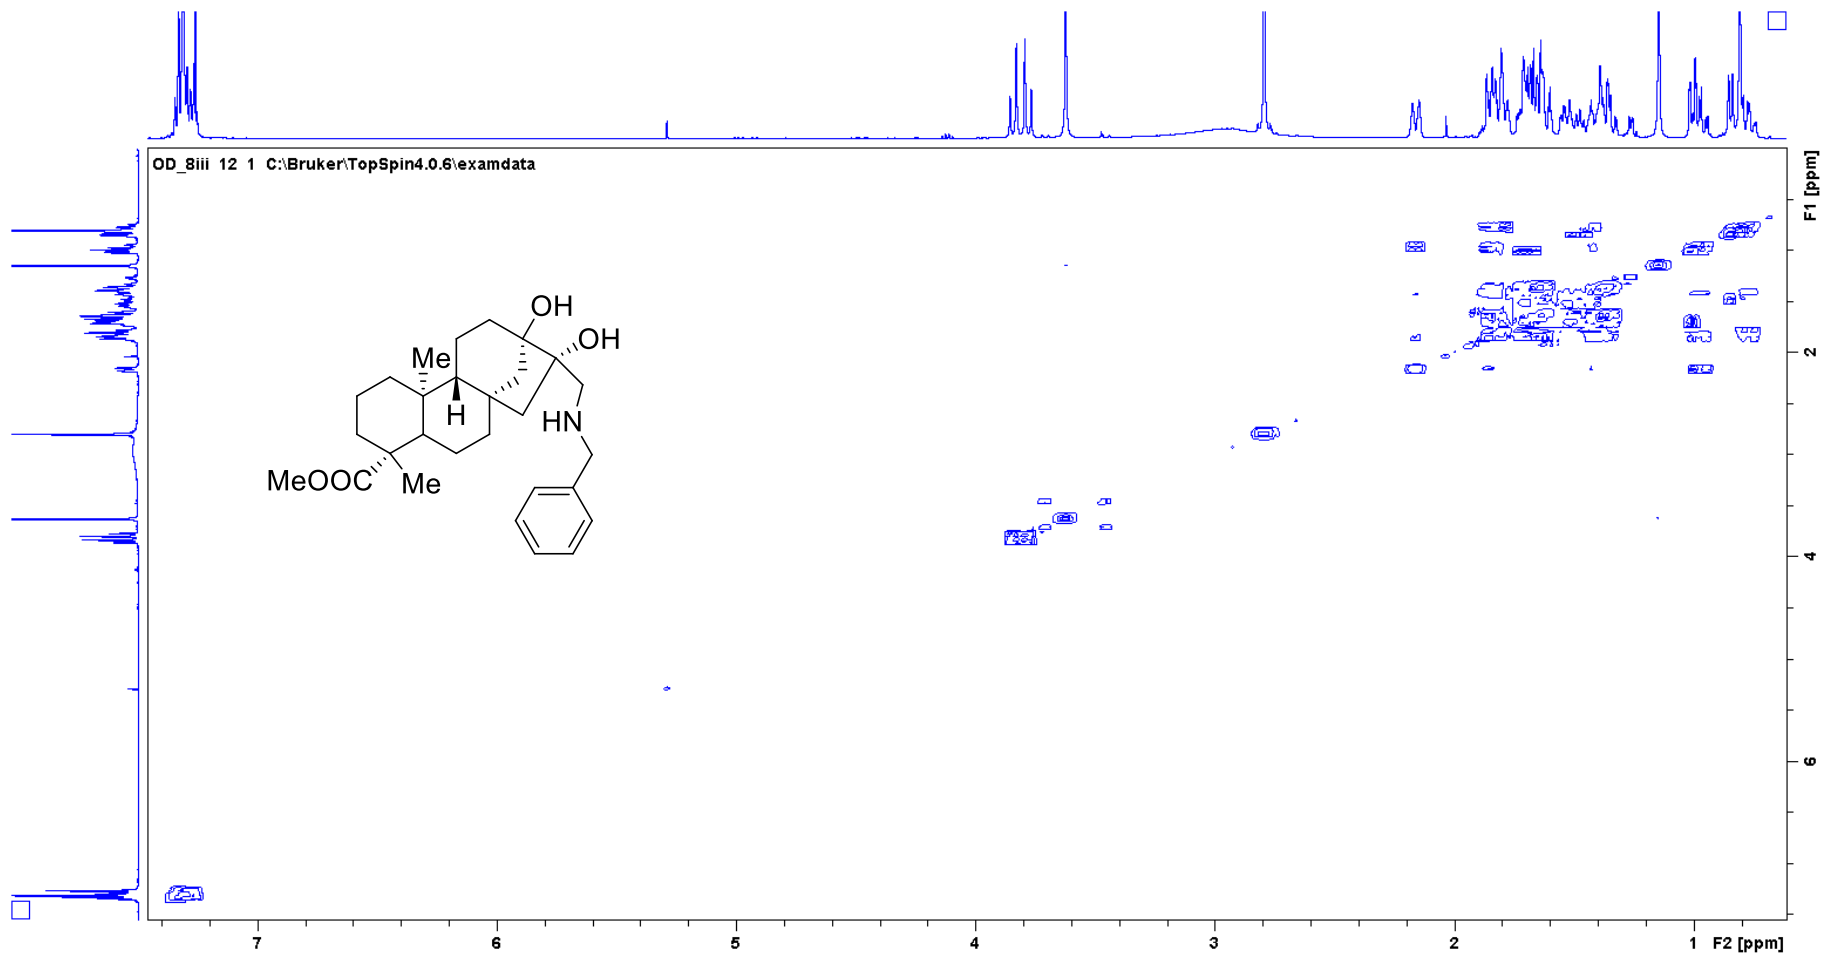

NOESY of compound 11

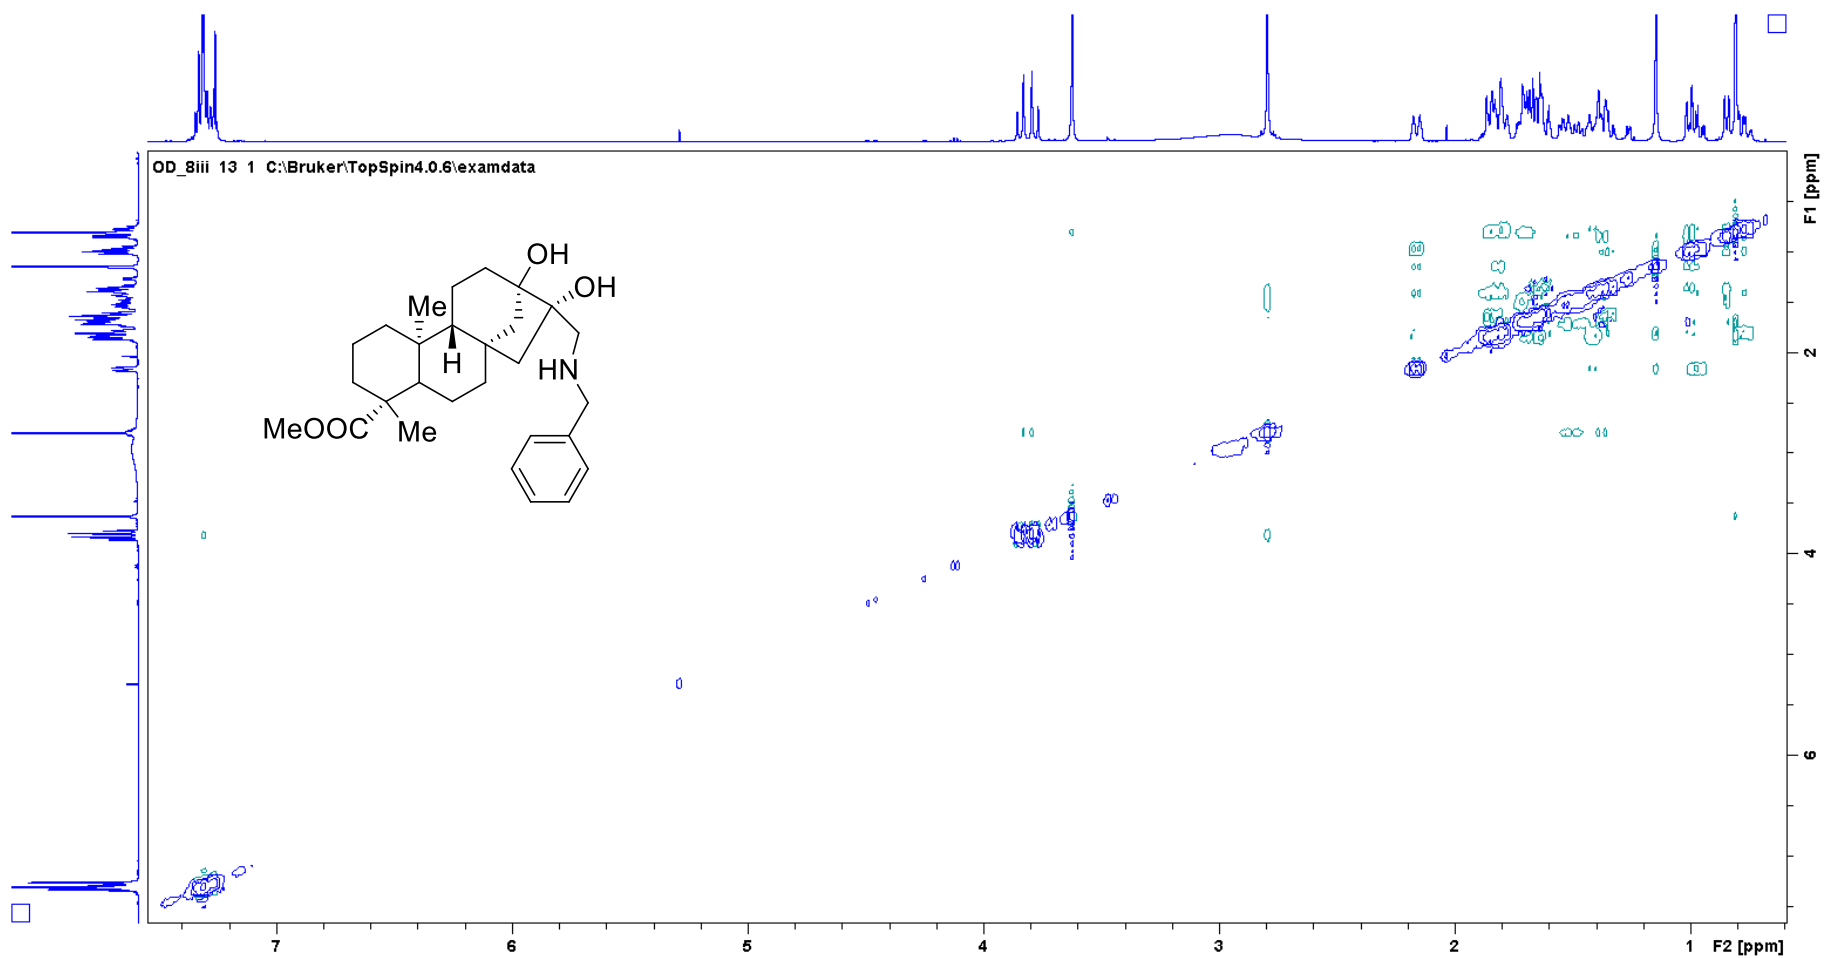

# HSQC of compound 11

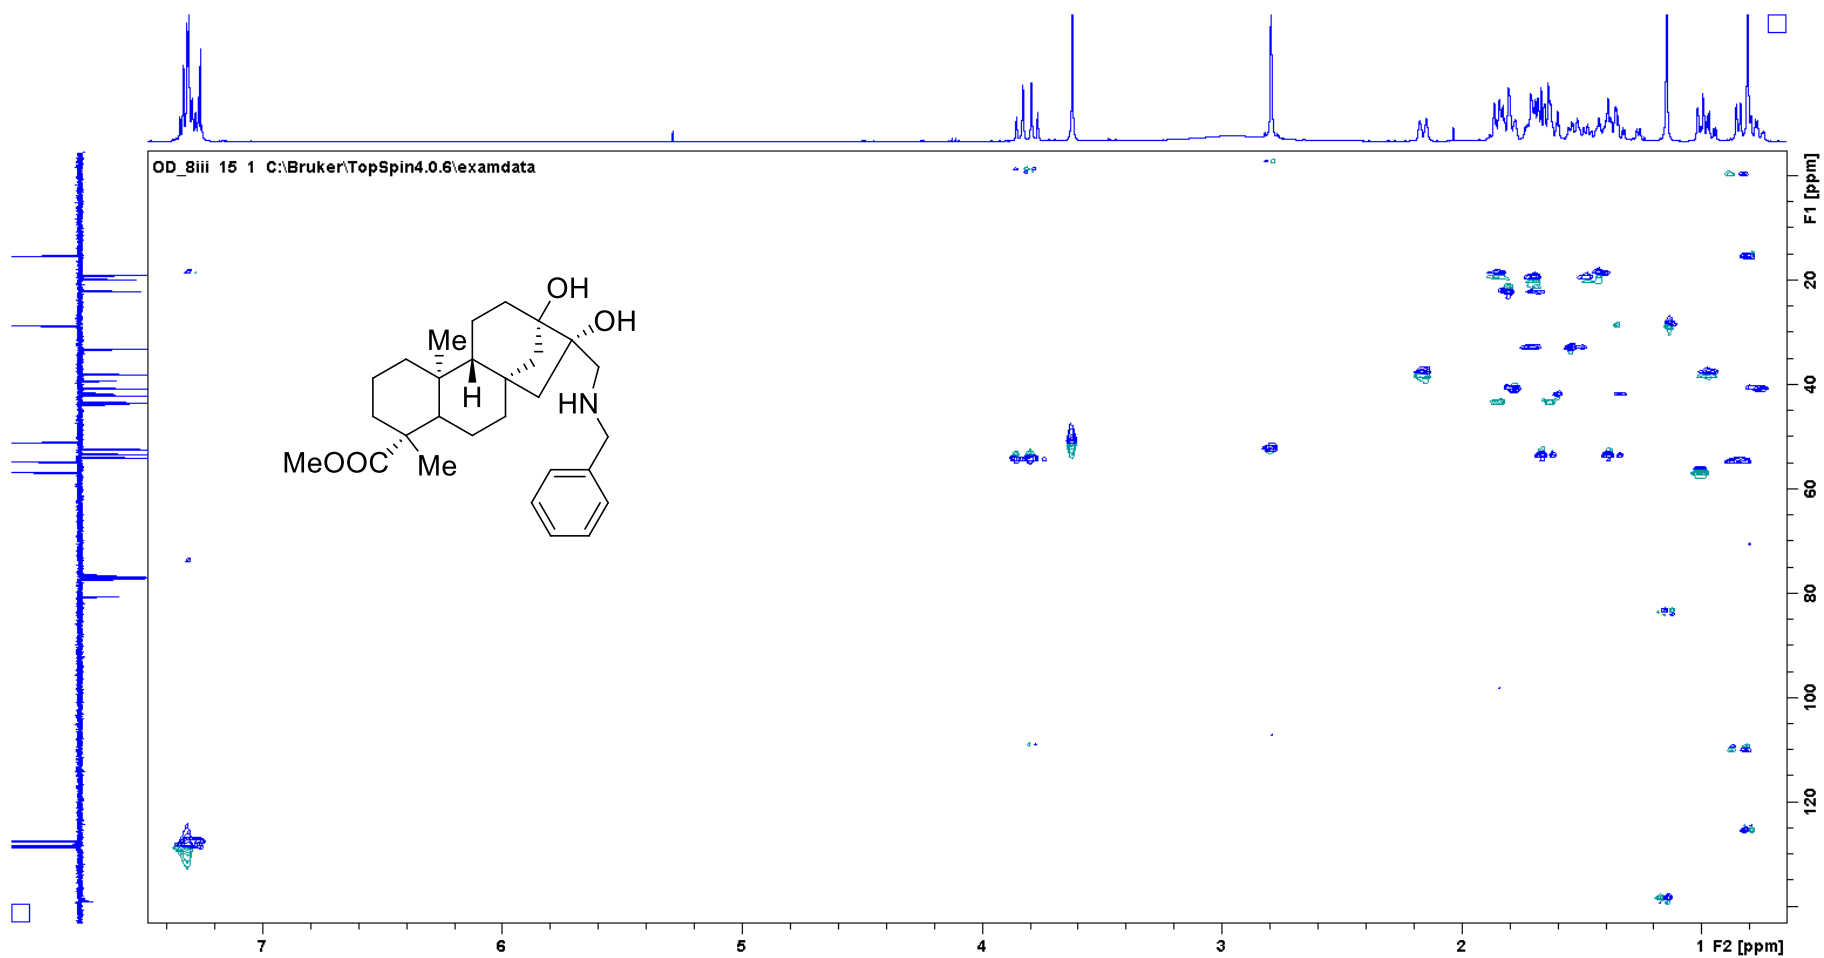

HMBC of compound 11

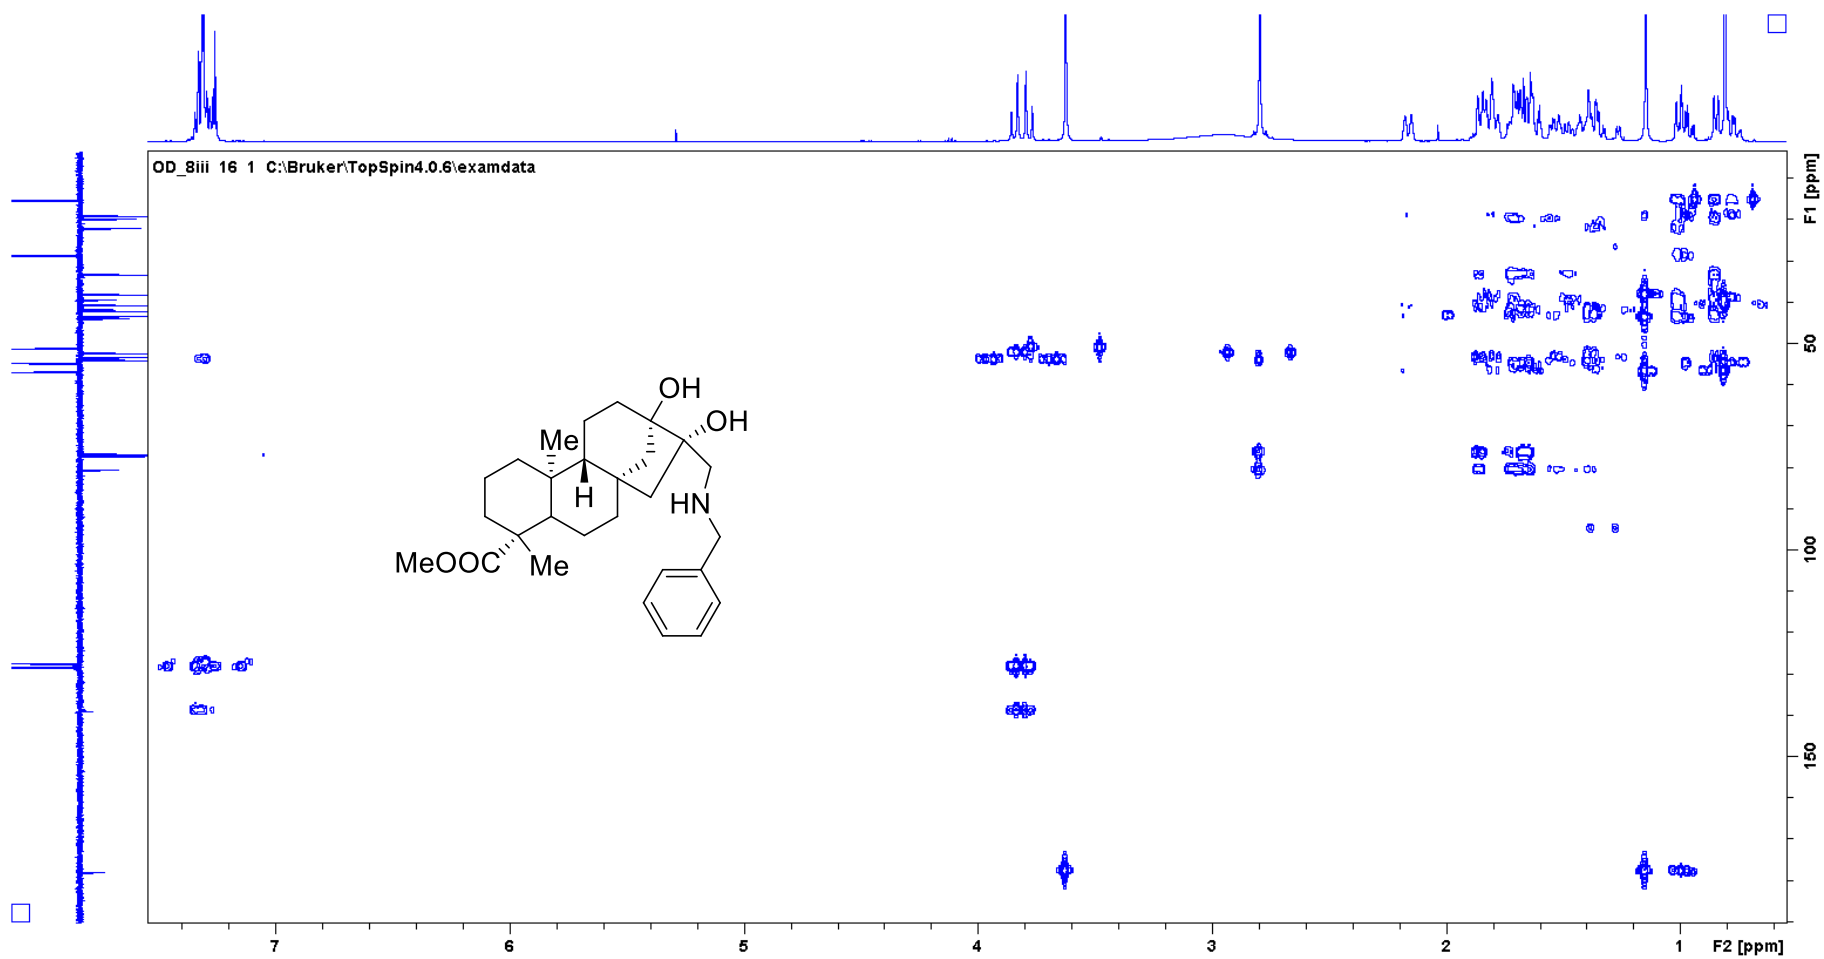



# <sup>1</sup>H-NMR of compound 12

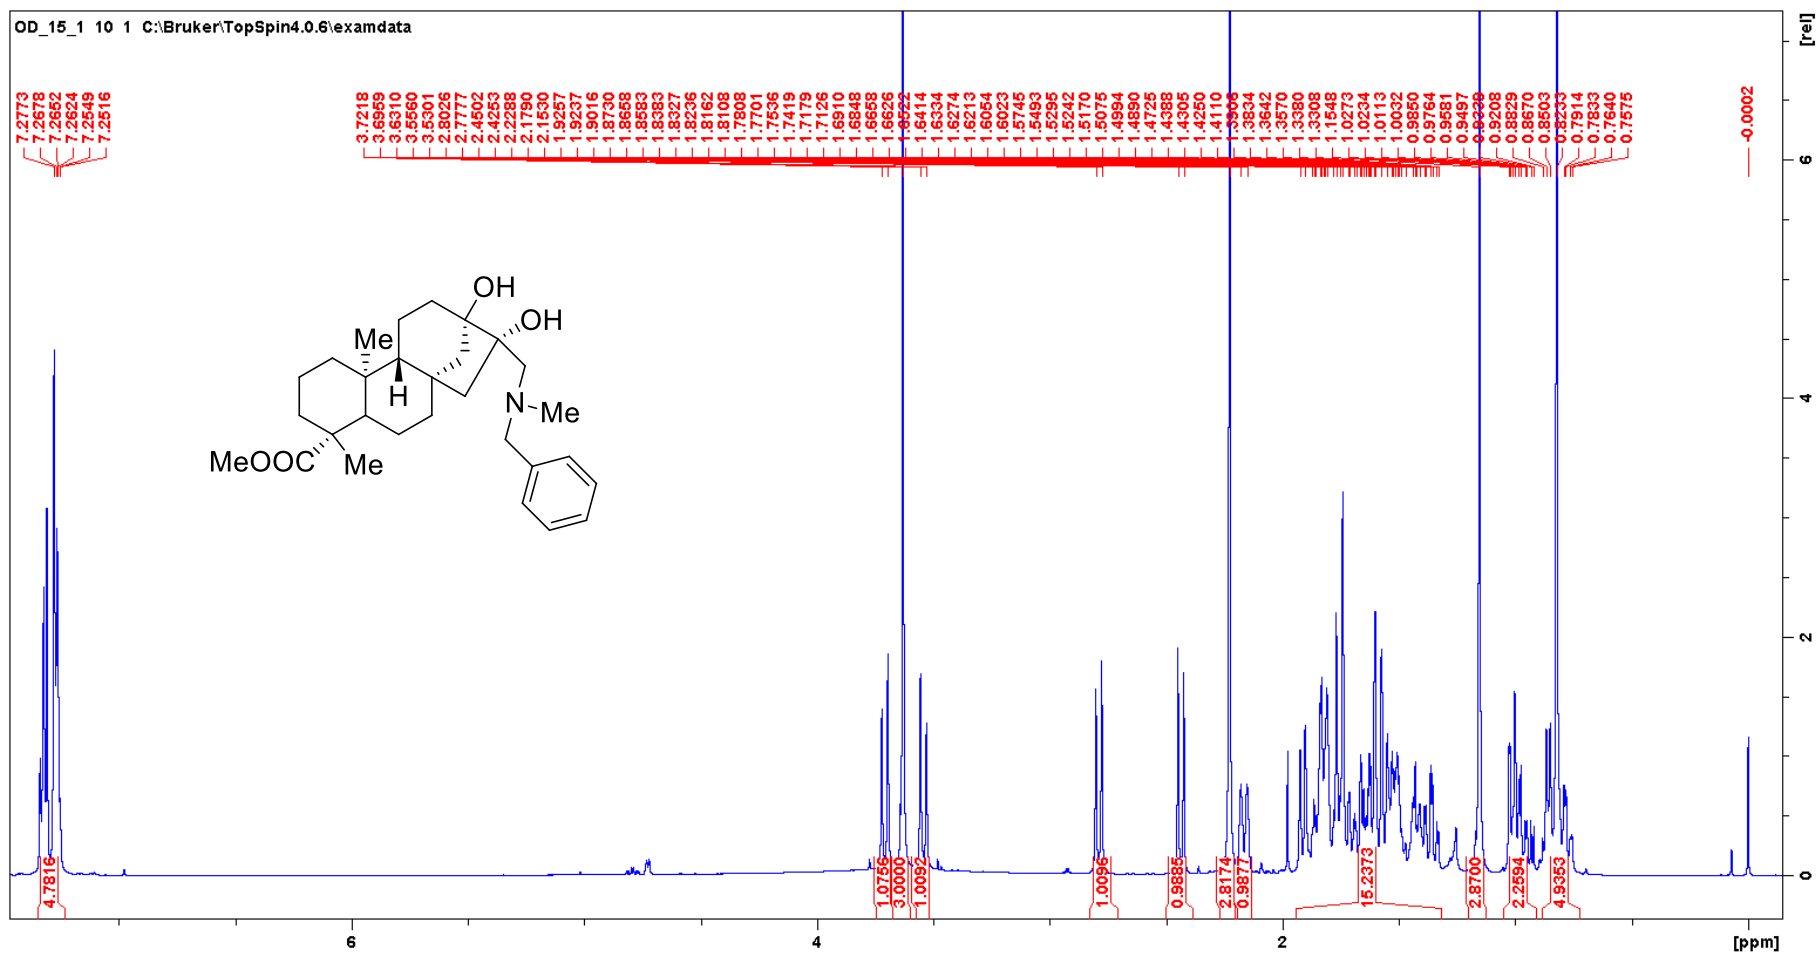

<sup>13</sup>C-NMR of compound 12

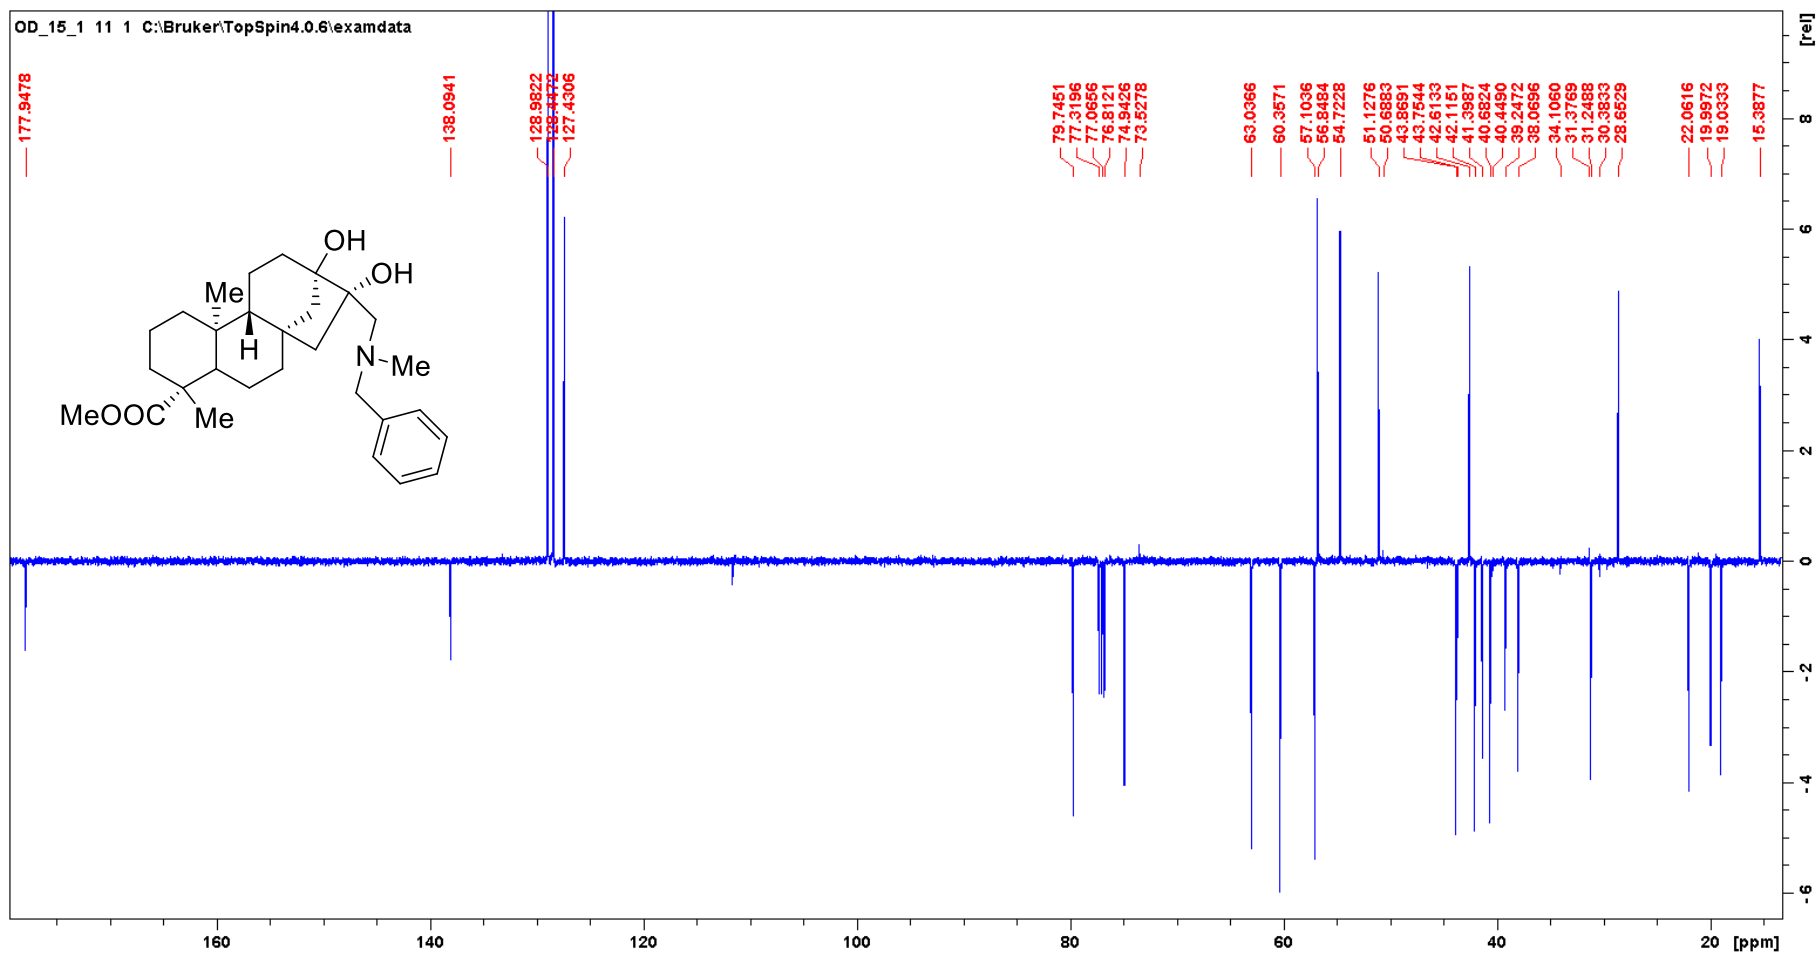

COSY of compound 12

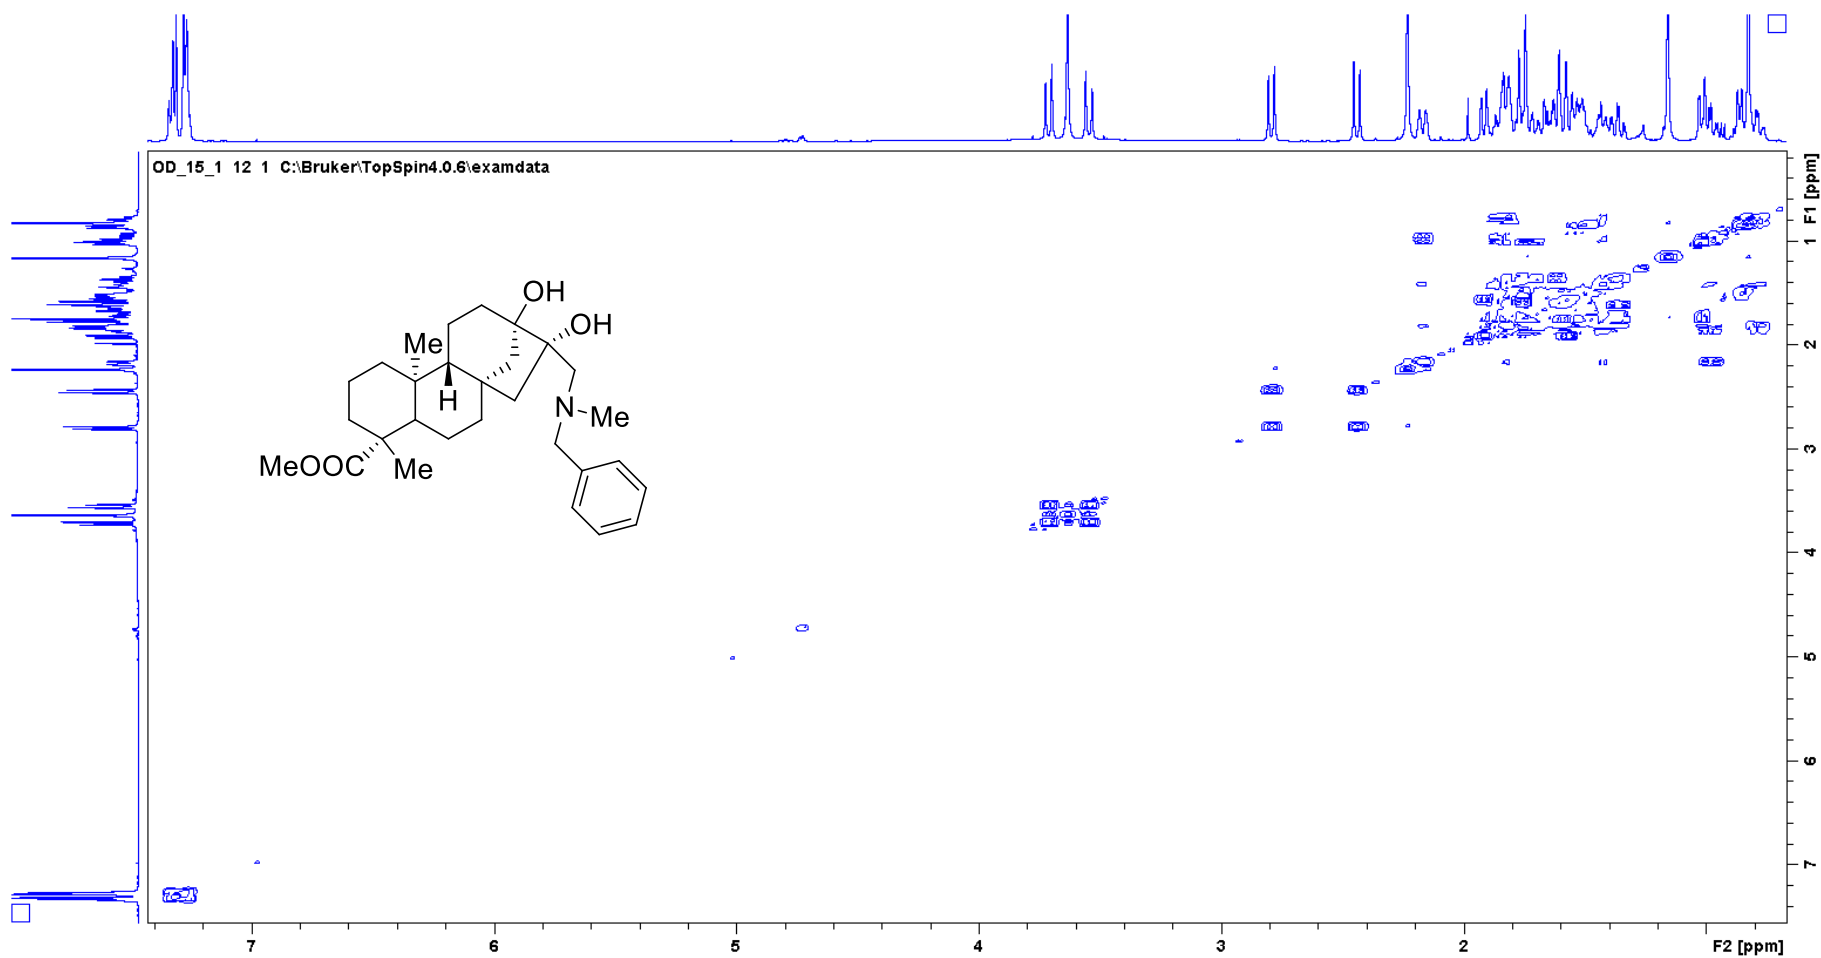

NOESY of compound 12

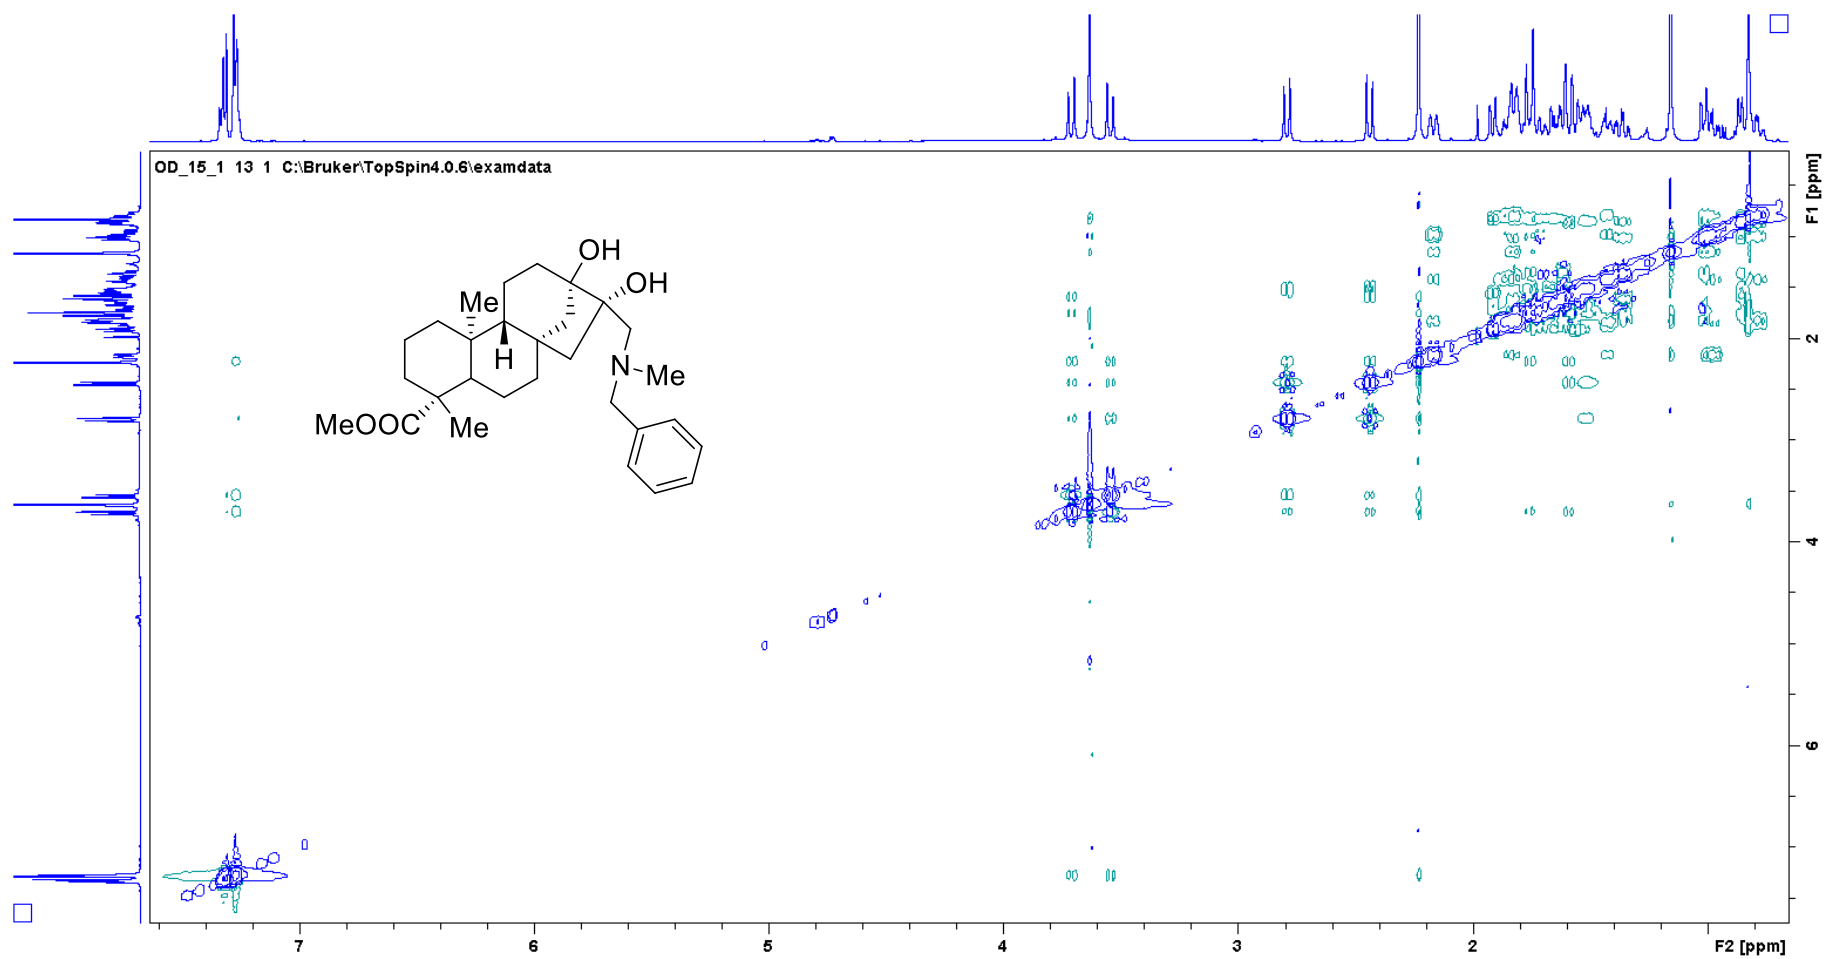

# HSQC of compound 12

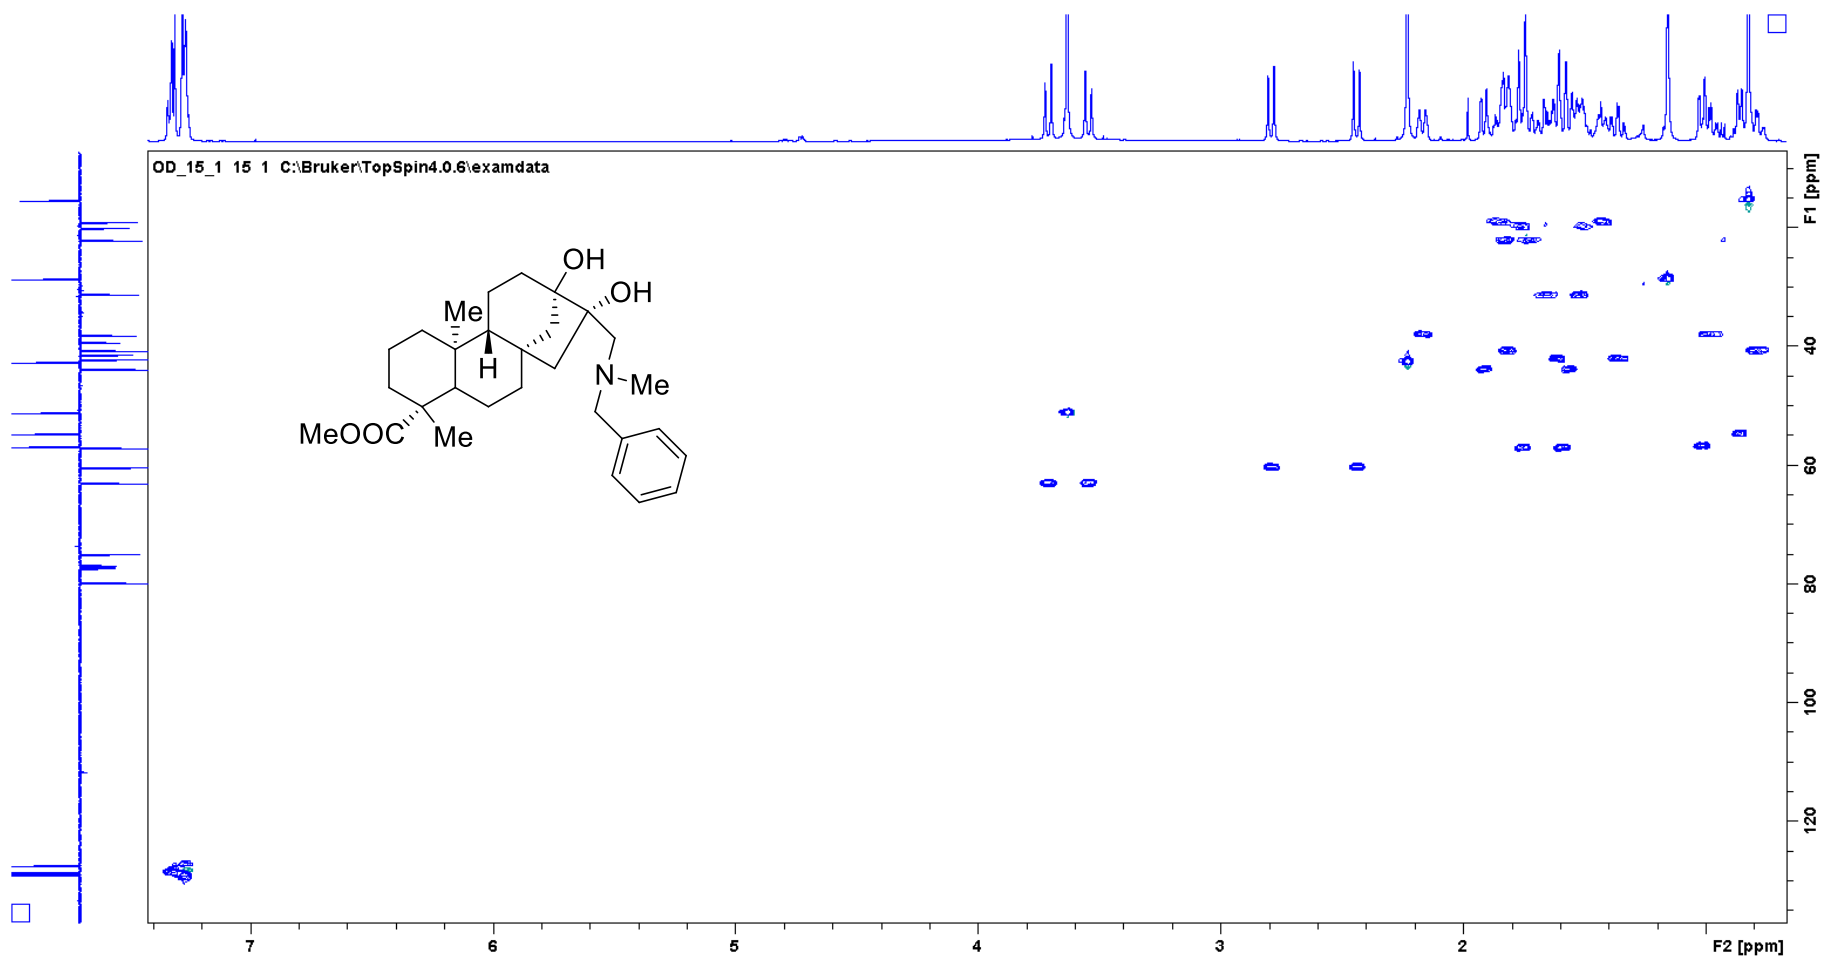

# HMBC of compound 12

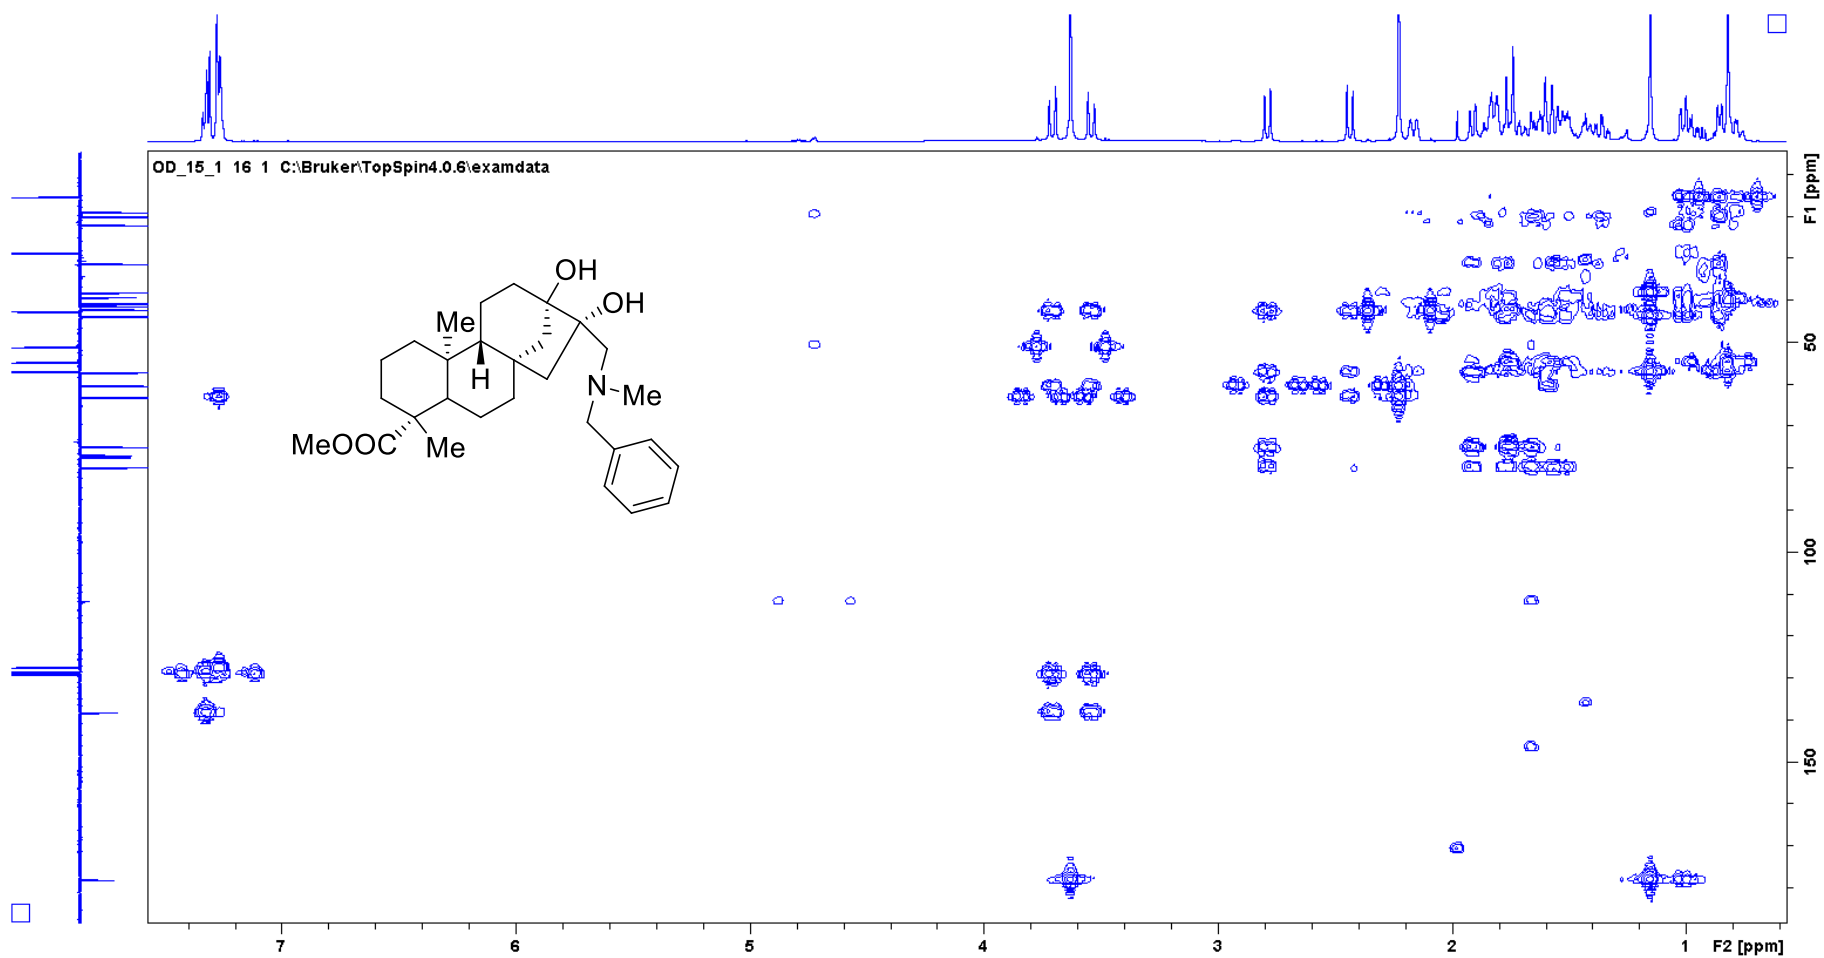

<sup>1</sup>H-NMR of compound 13

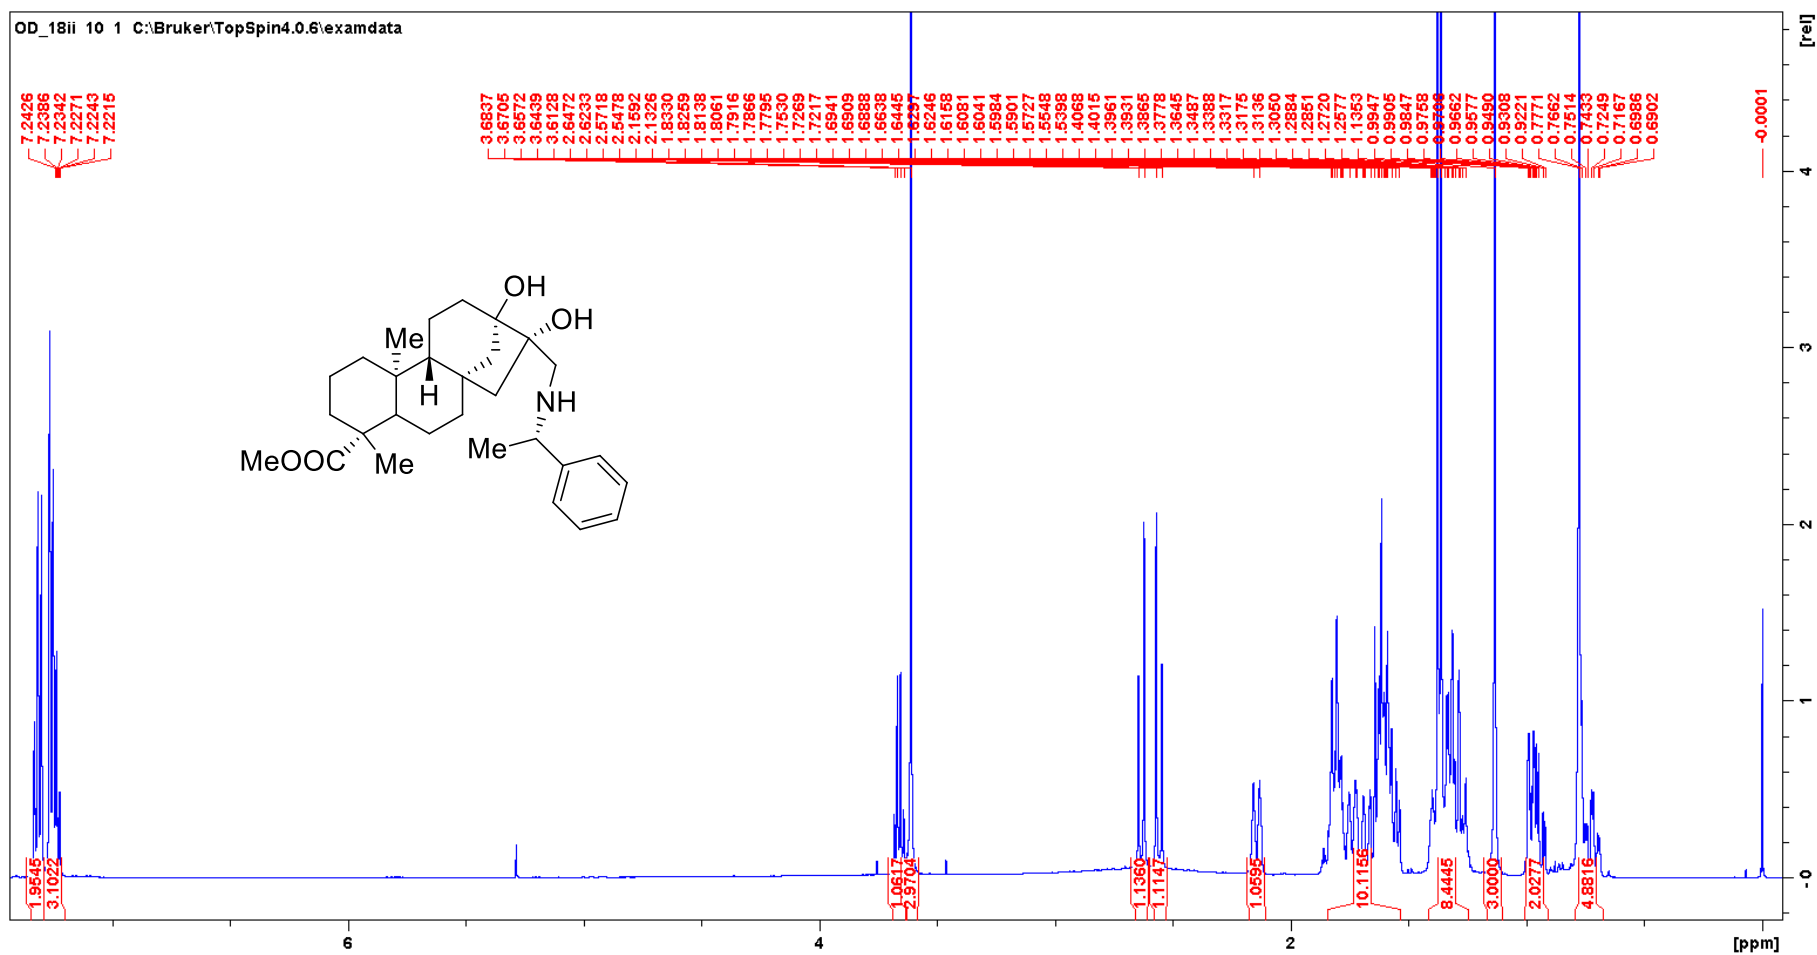

<sup>13</sup>C-NMR of compound 13

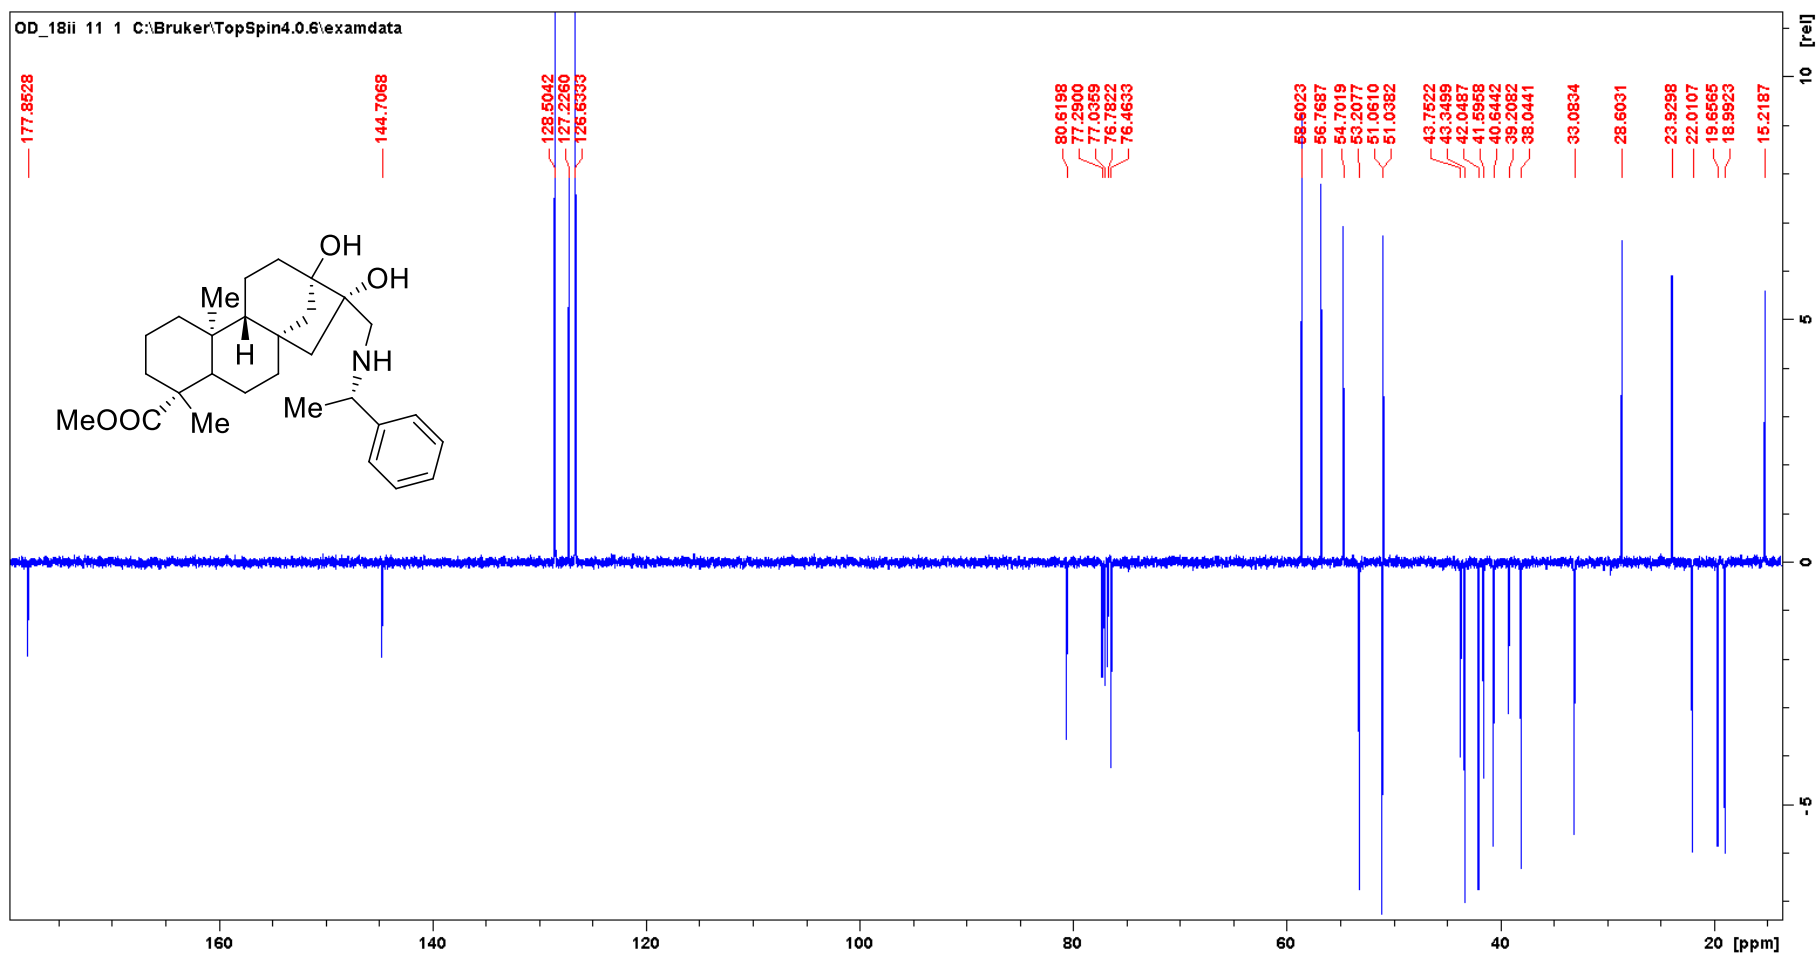



# COSY of compound 13

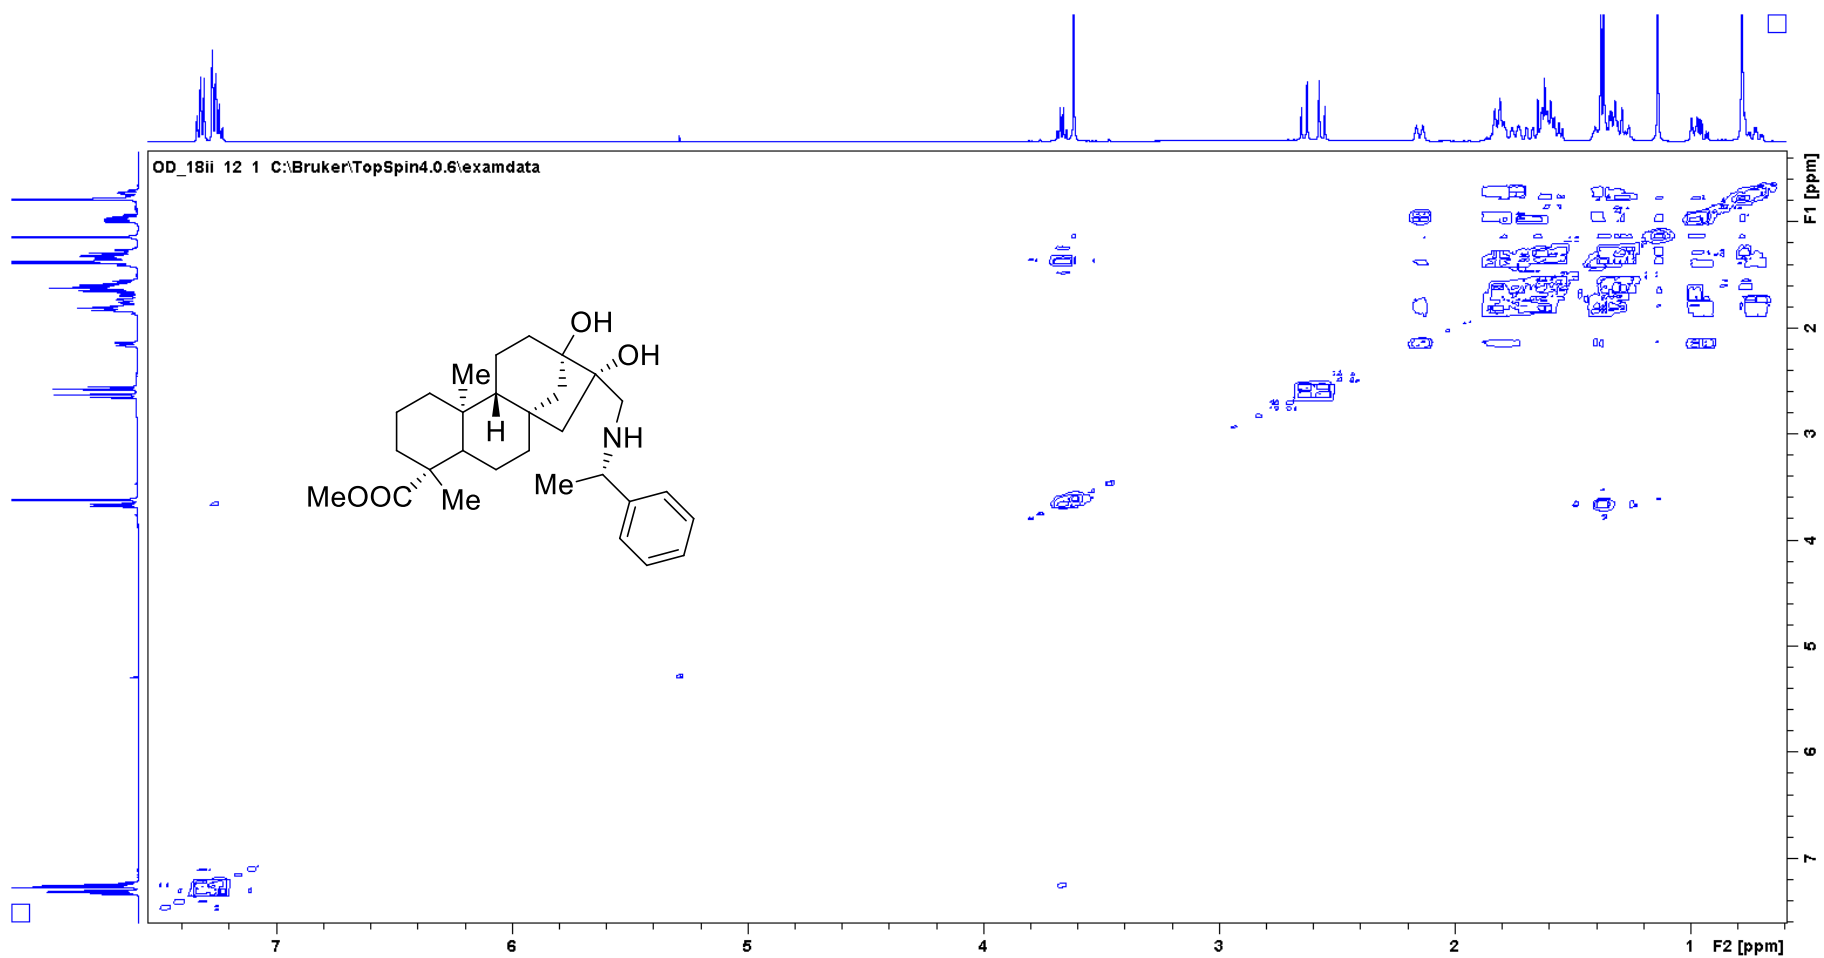

# NOESY of compound 13

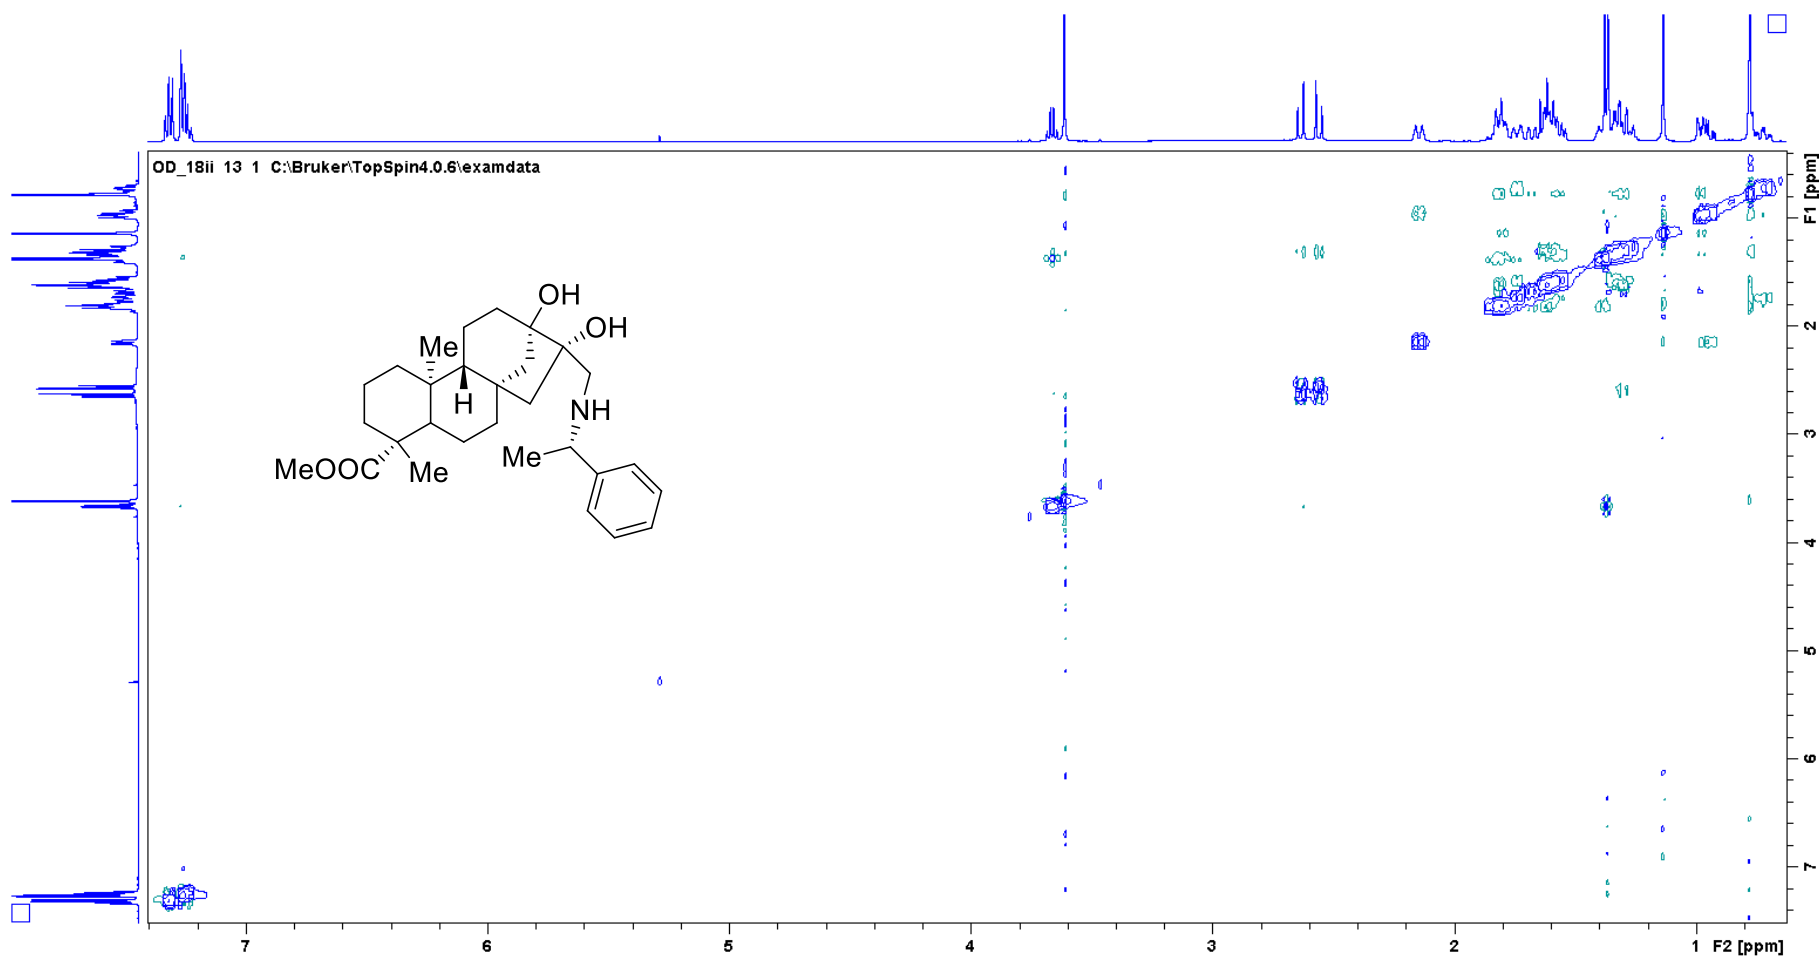

# HSQC of compound 13

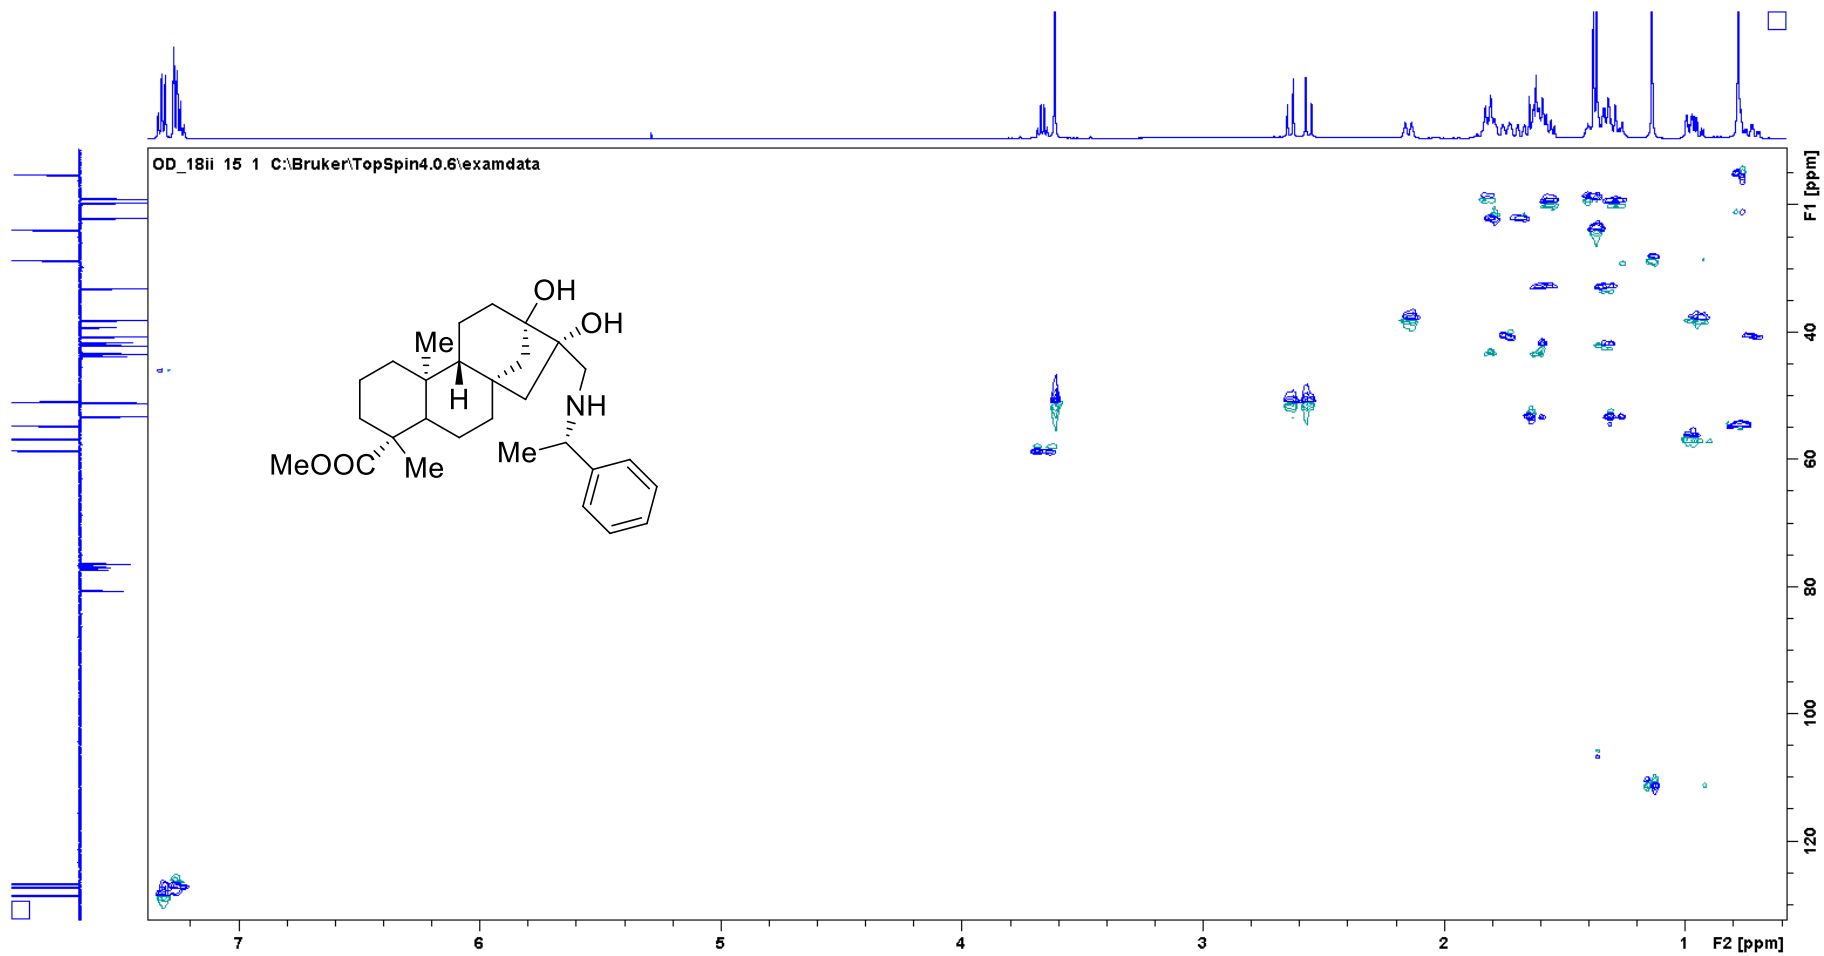

# HMBC of compound 13

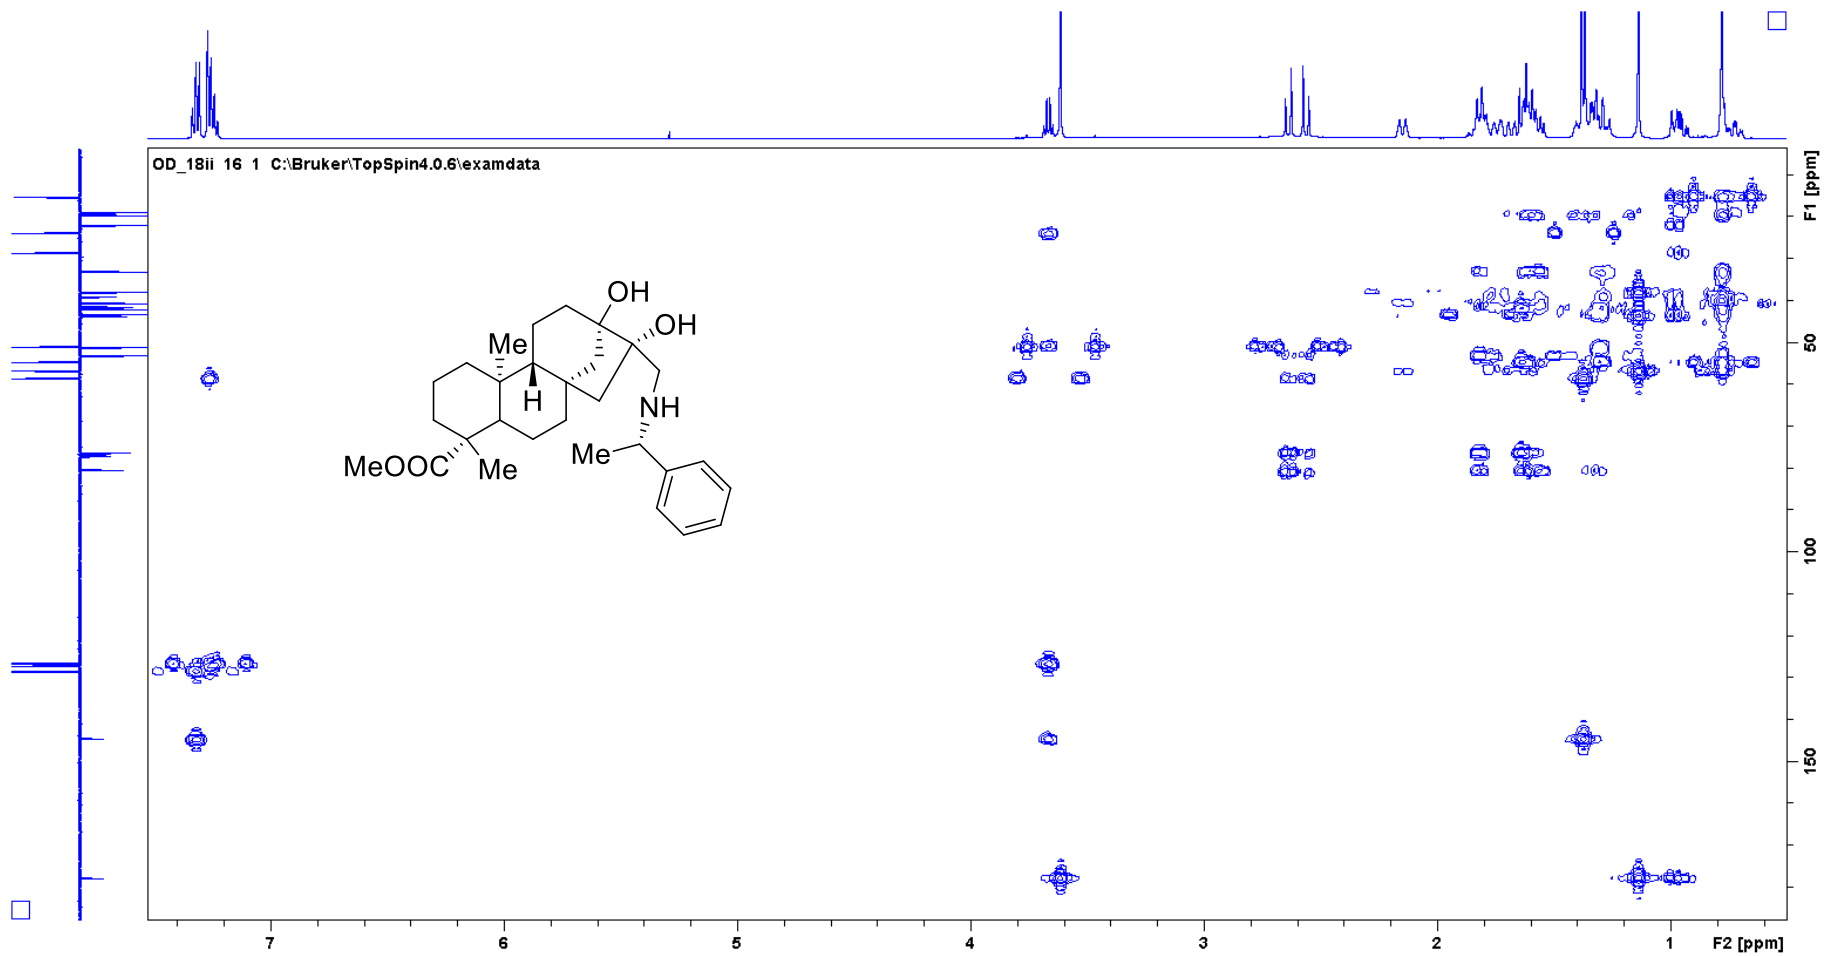

<sup>1</sup>H-NMR of compound 14

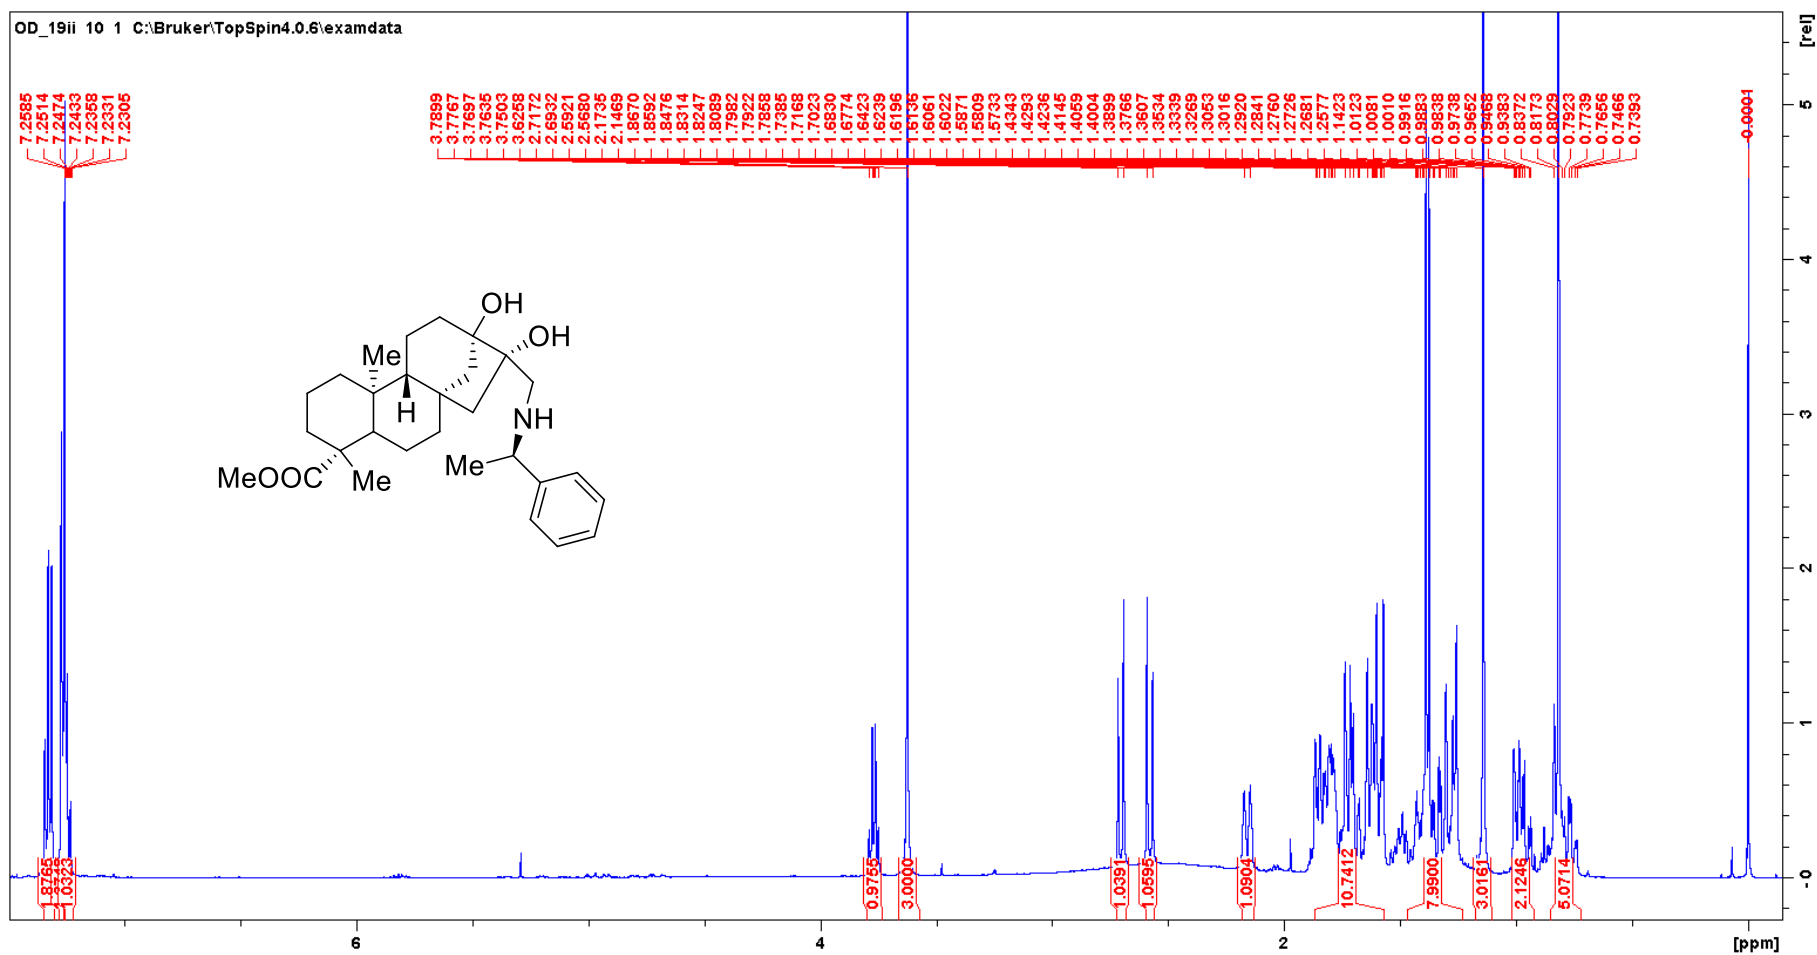

<sup>13</sup>C-NMR of compound 14

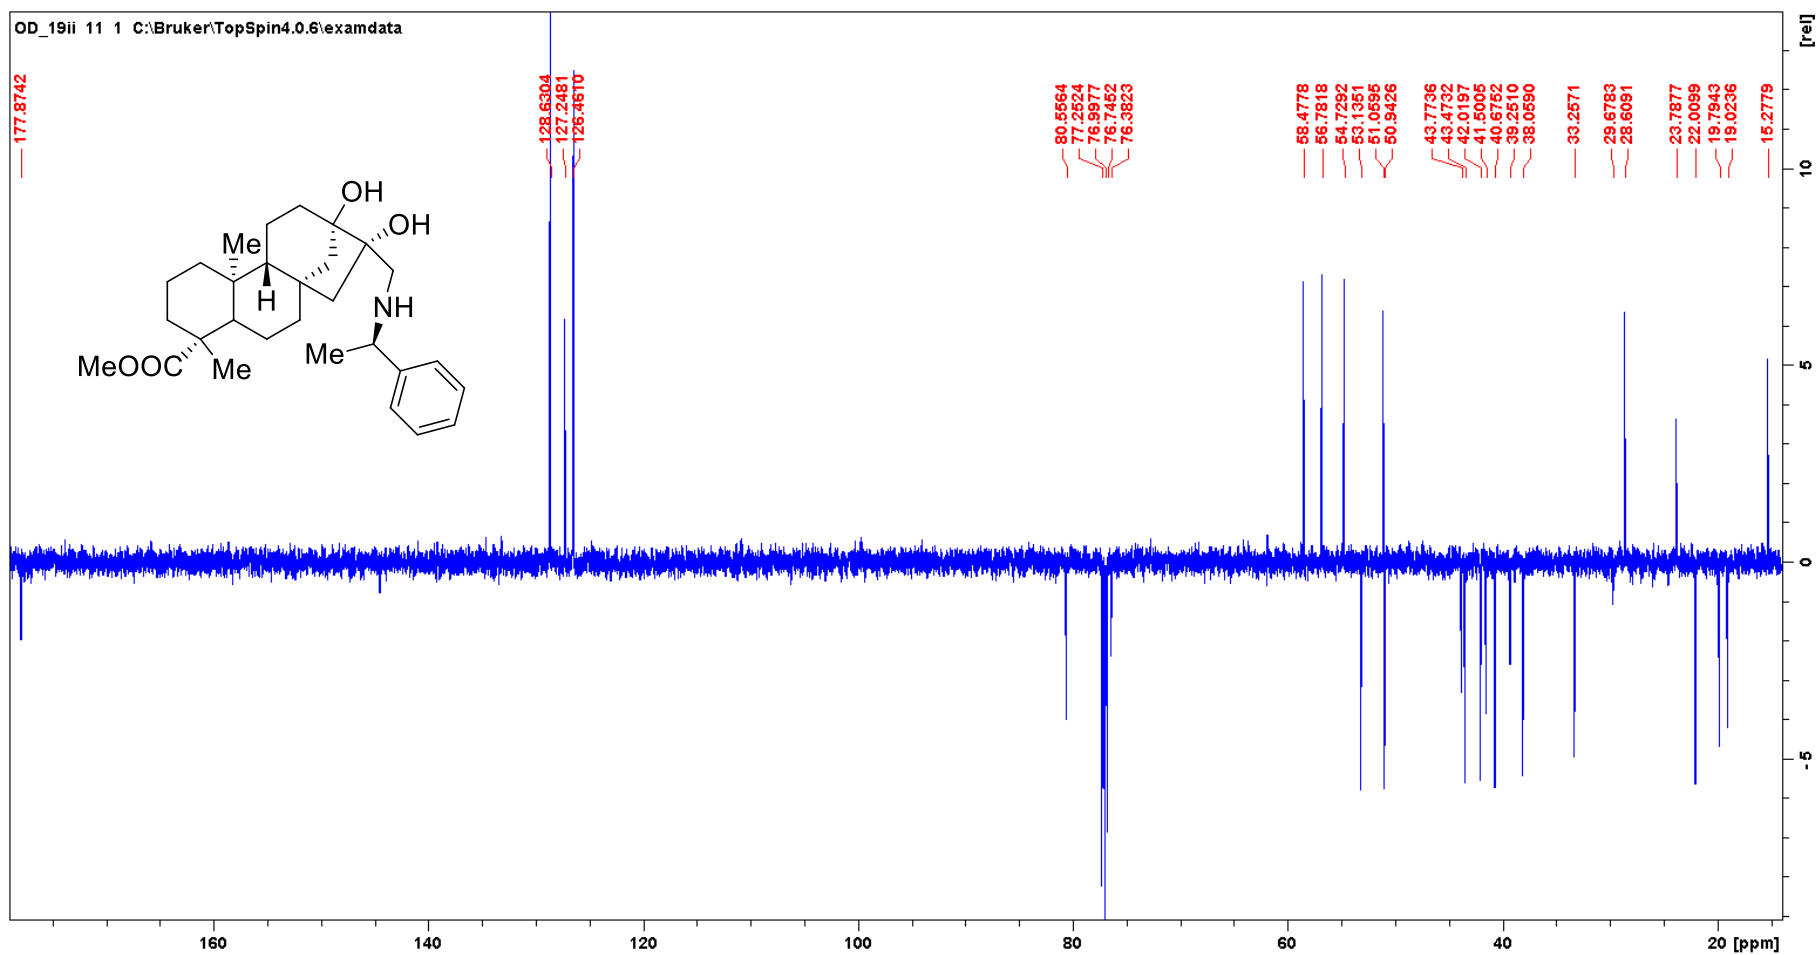

COSY of compound 14

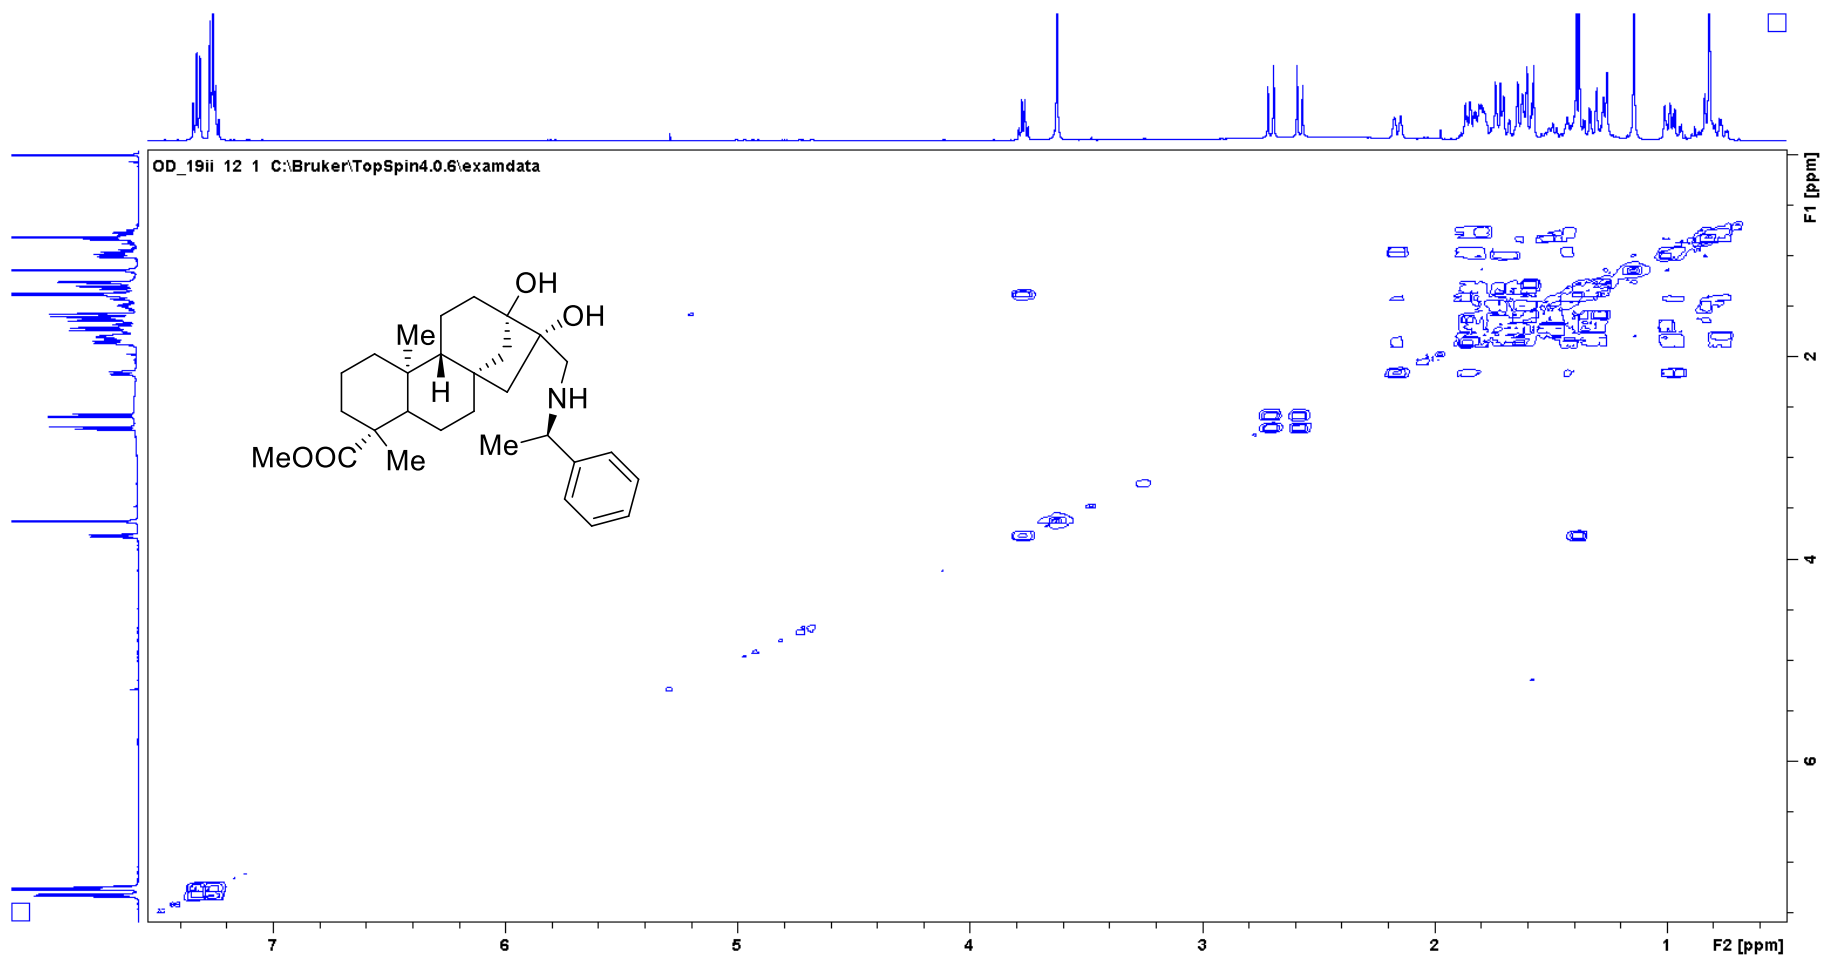

NOESY of compound 14

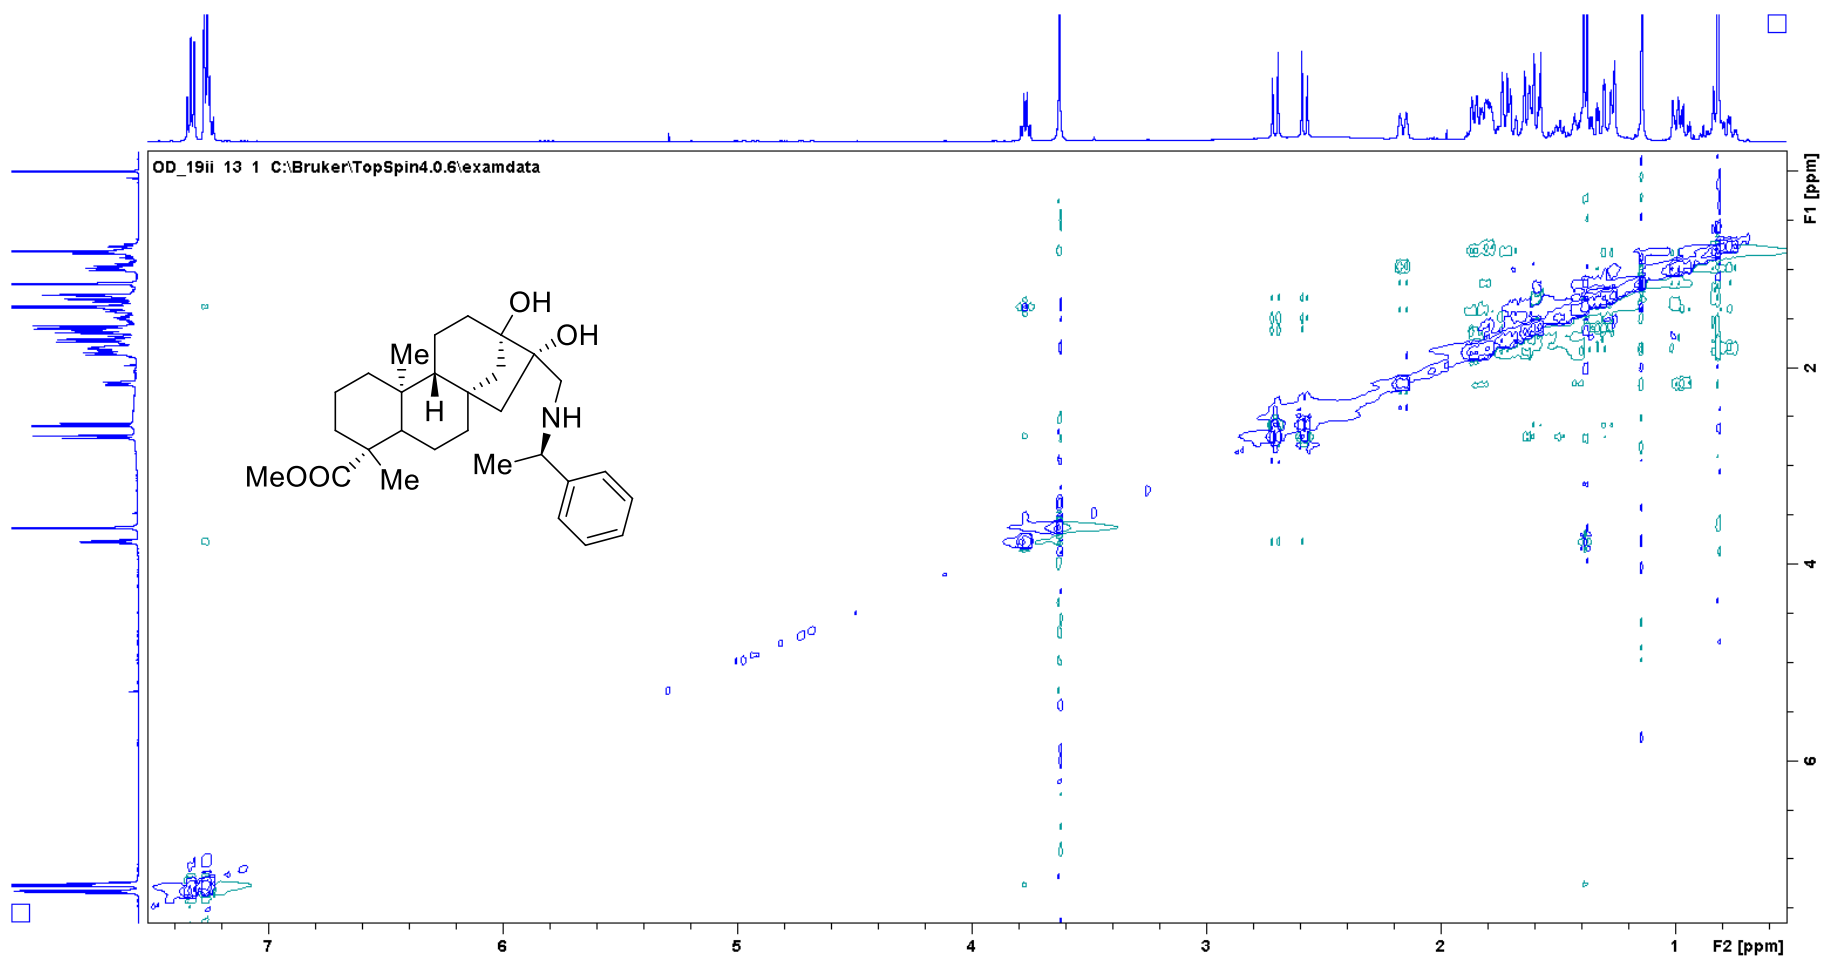



HSQC of compound 14

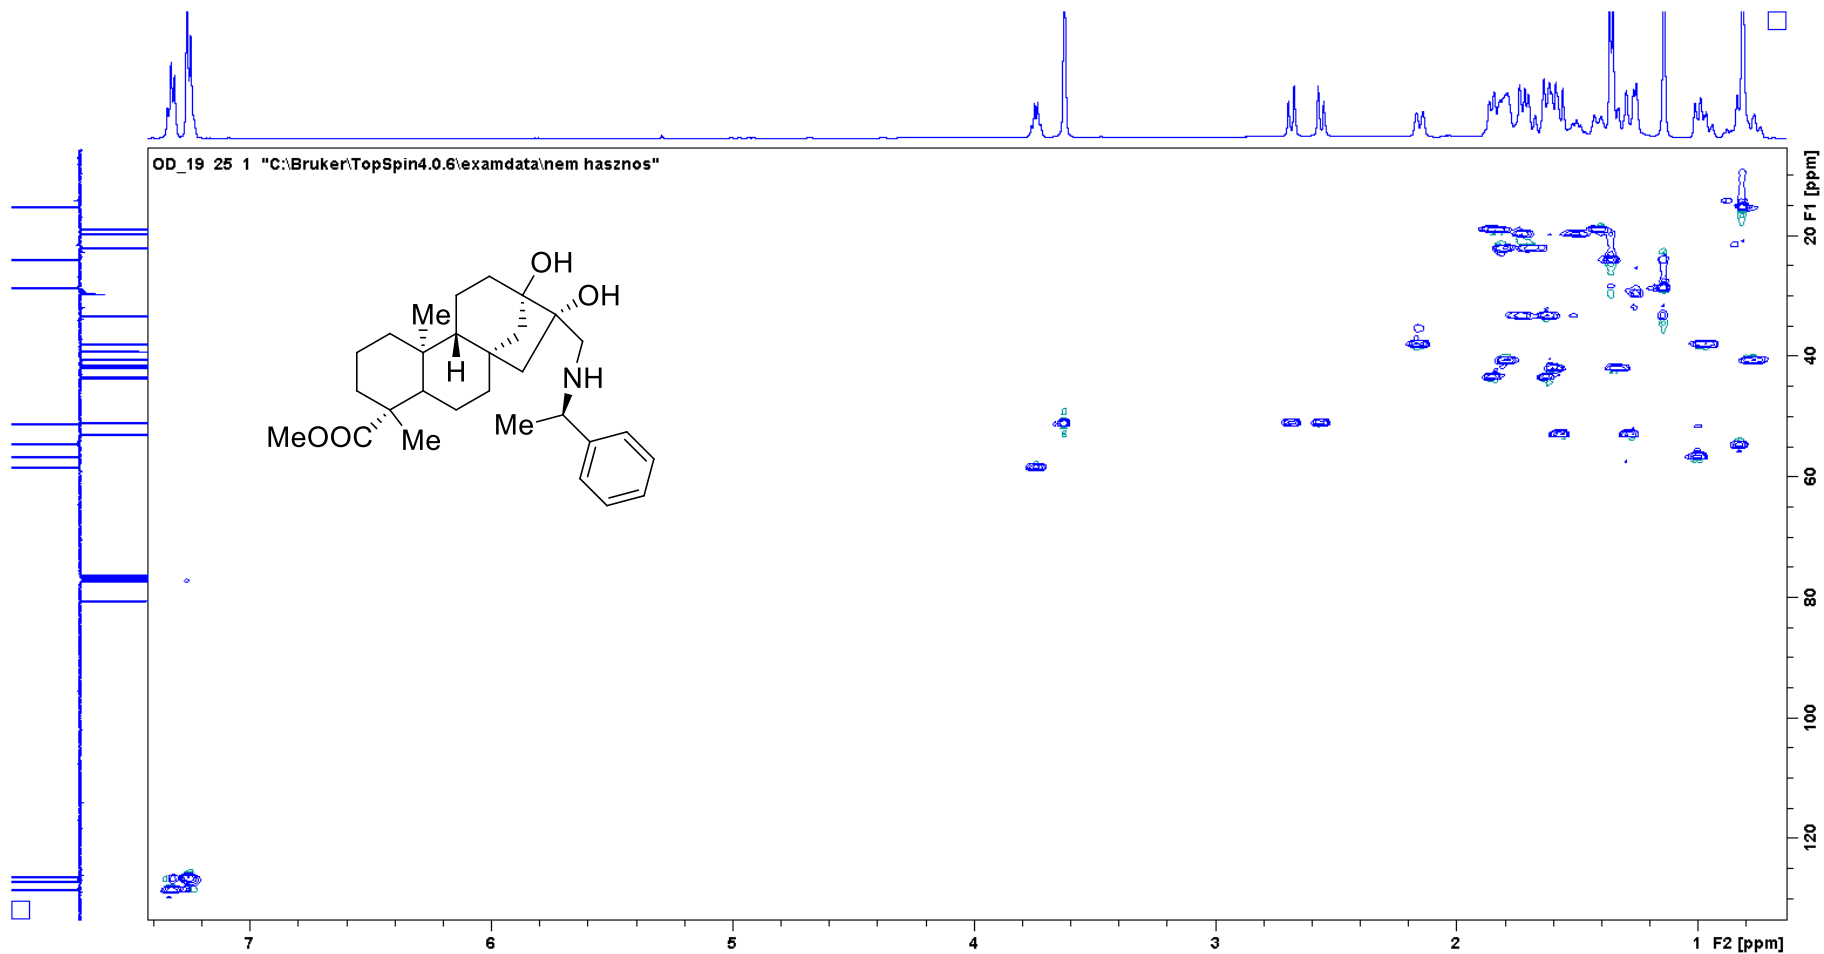

HMBC of compound 14

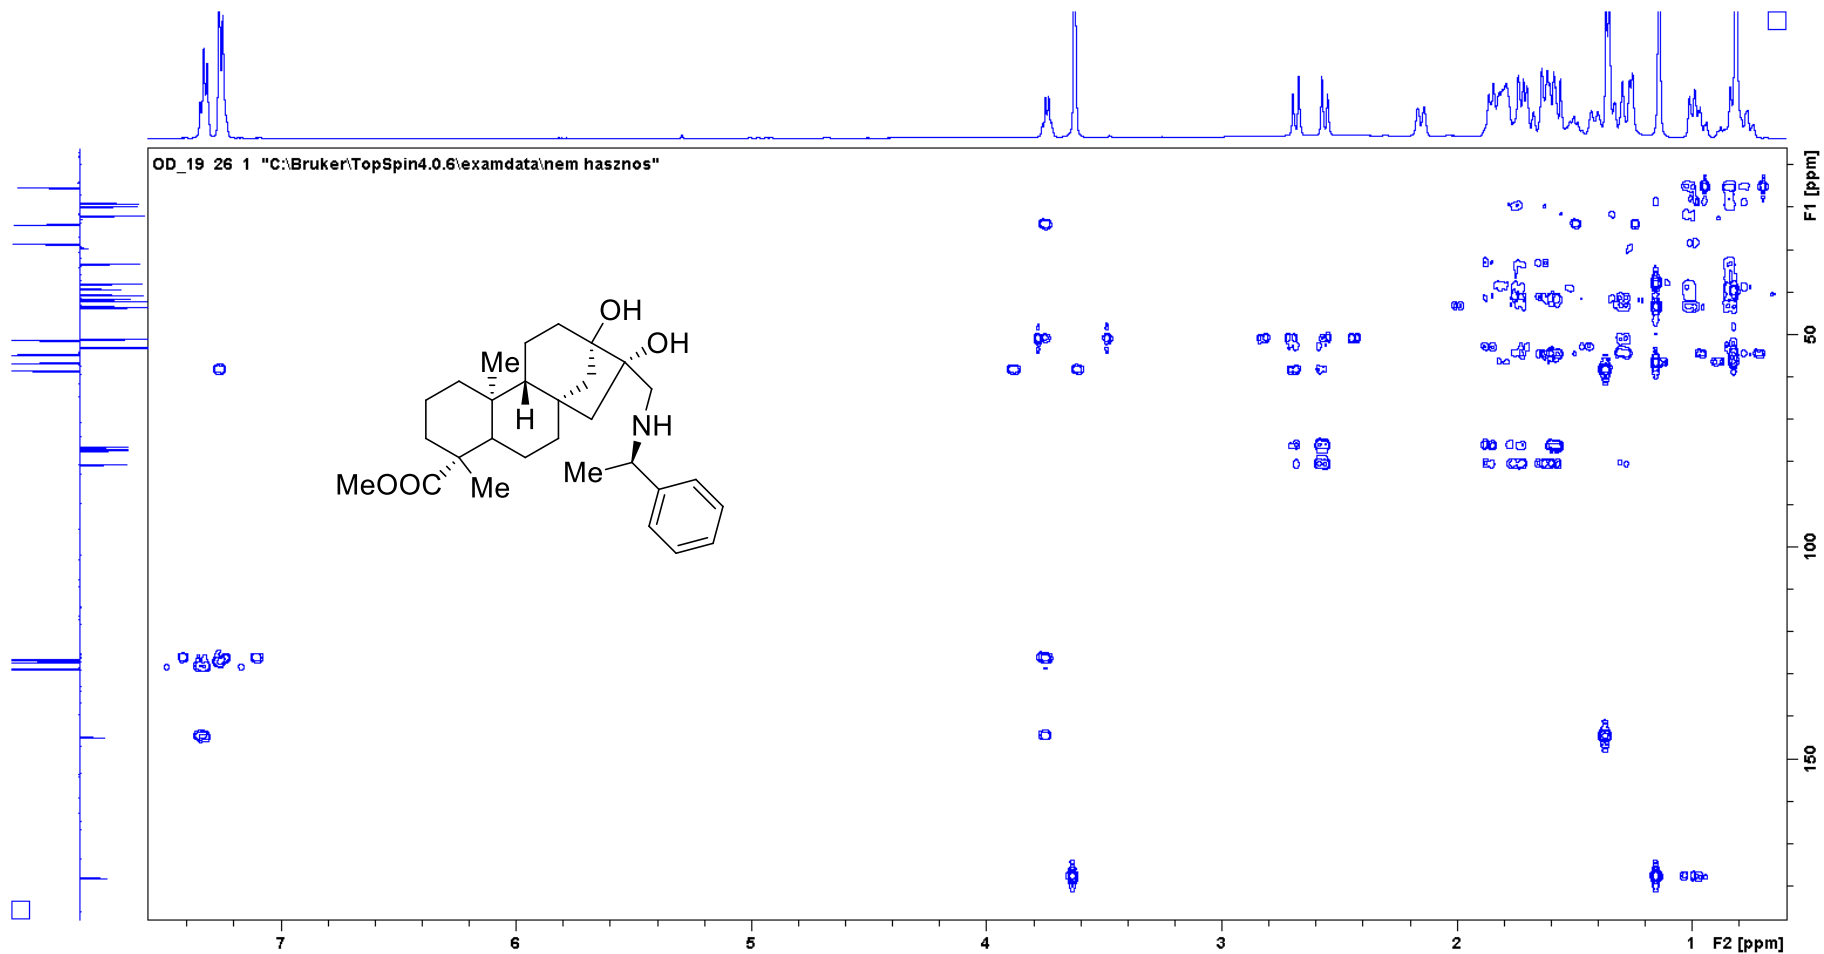

<sup>1</sup>H-NMR of compound 15

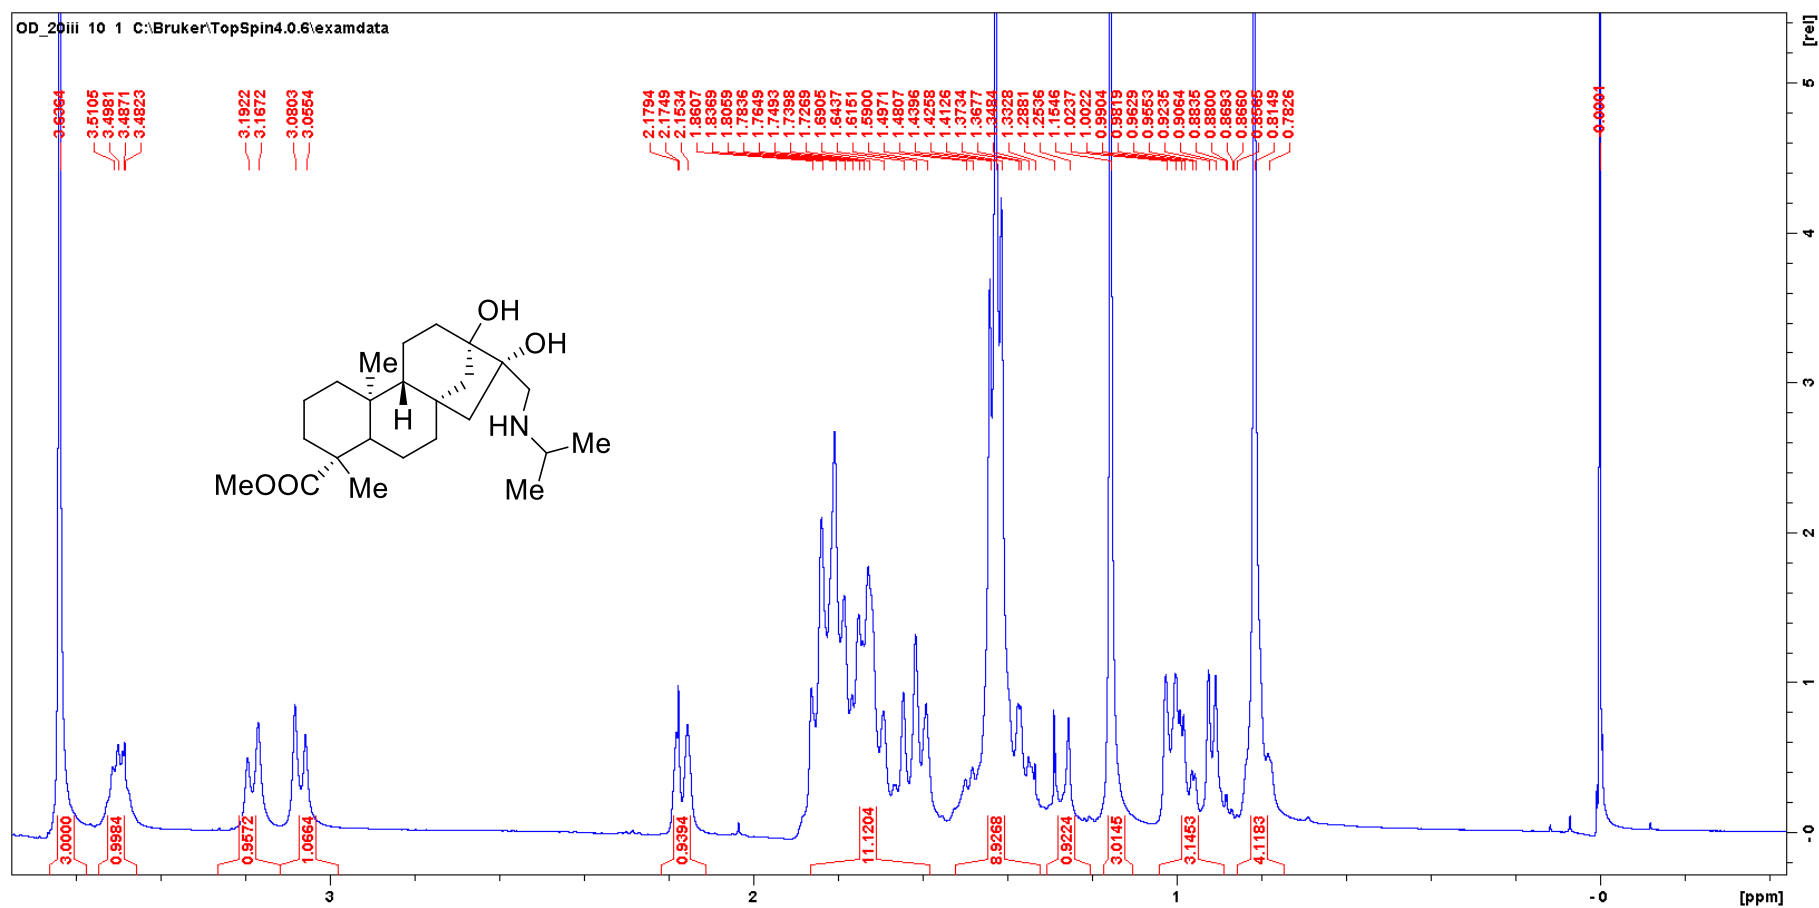

$^{13}\text{C}$ -NMR of compound 15

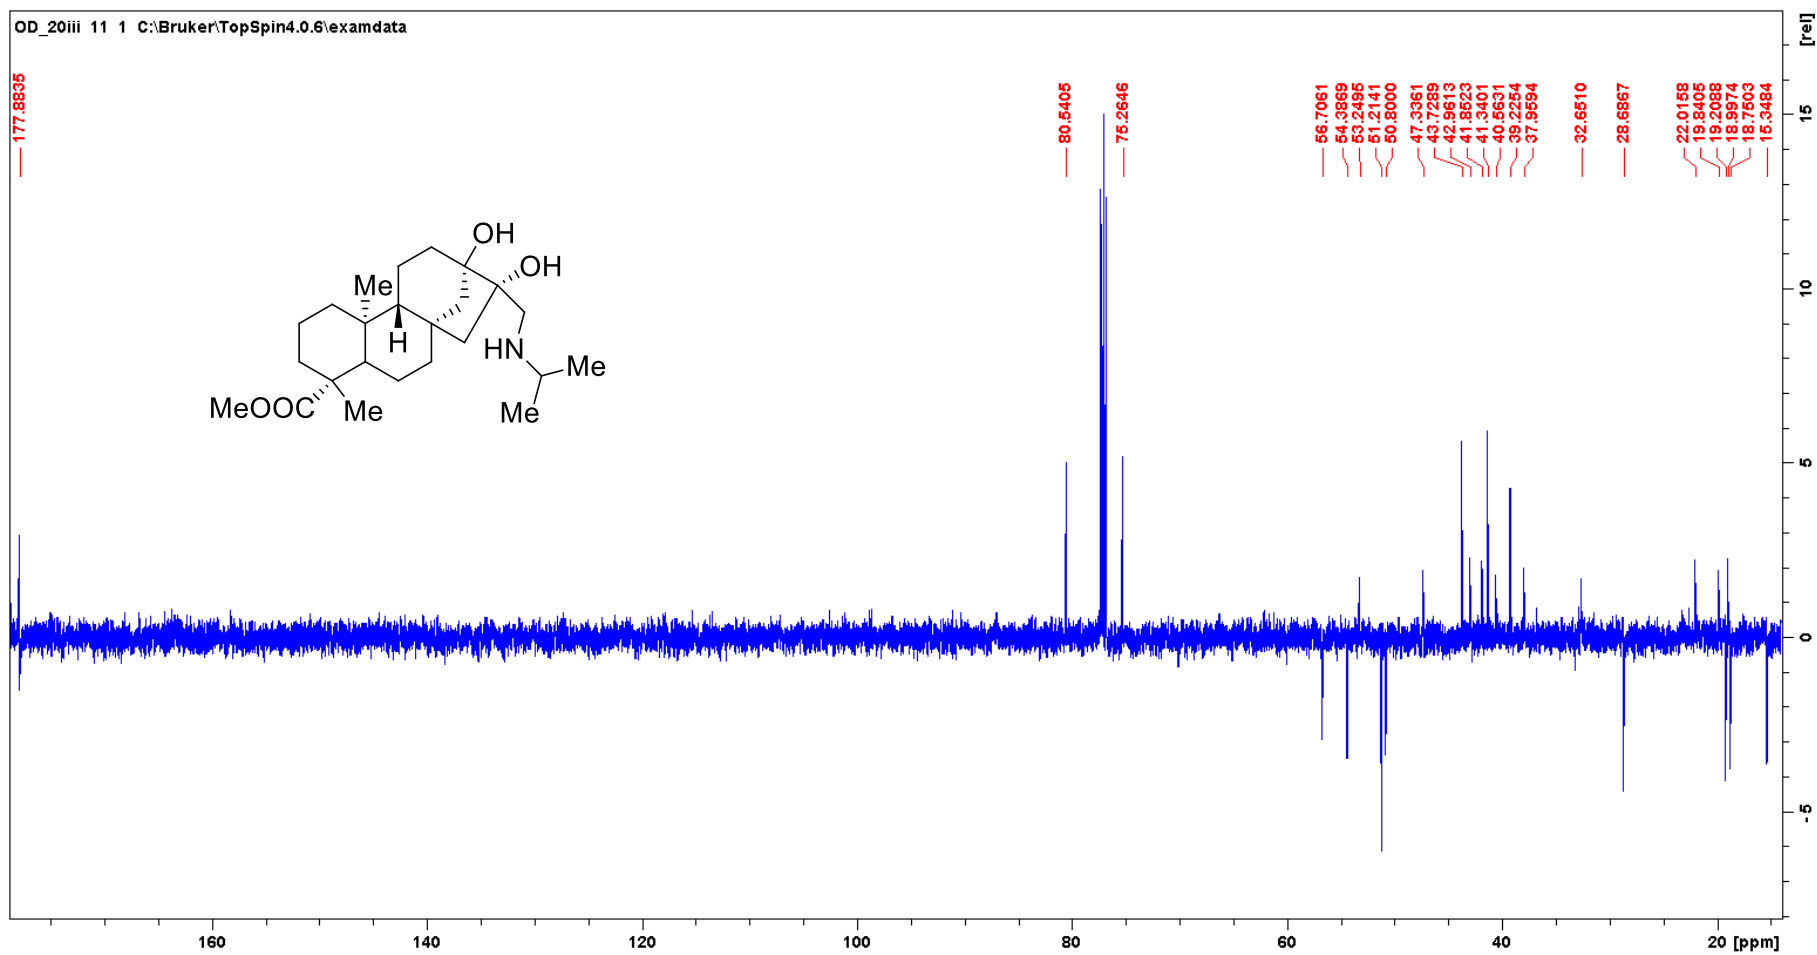

COSY of compound 15

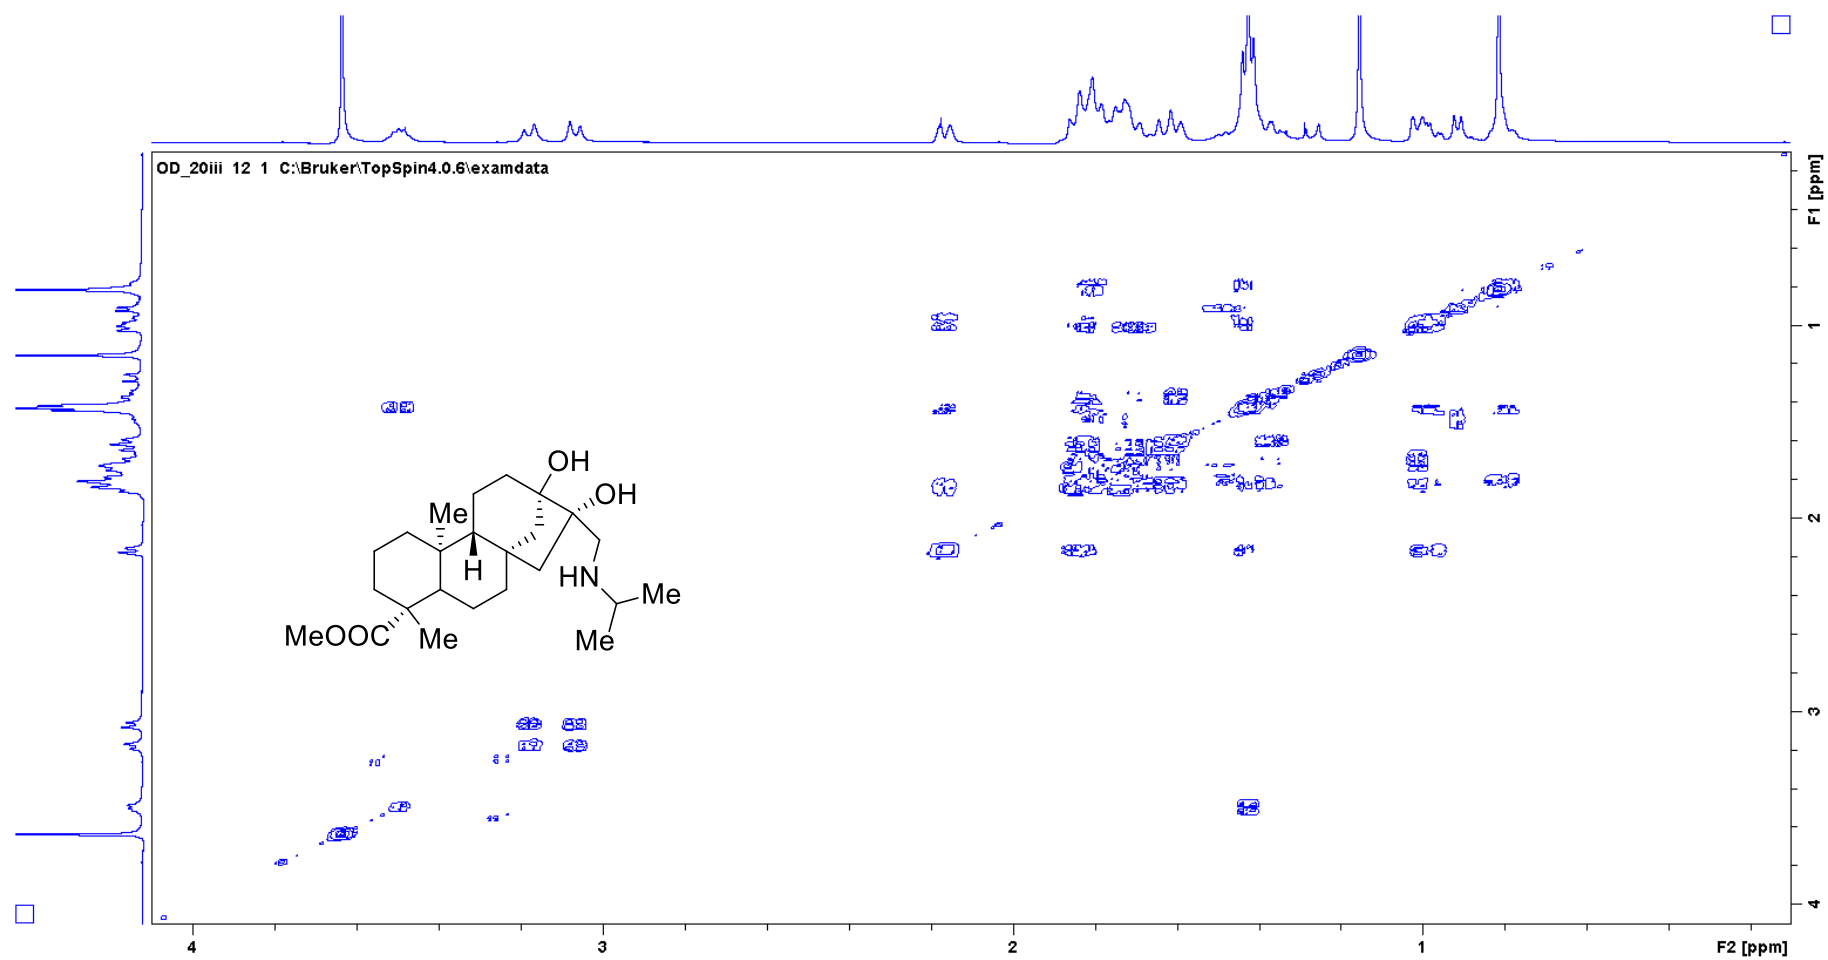

NOESY of compound 15

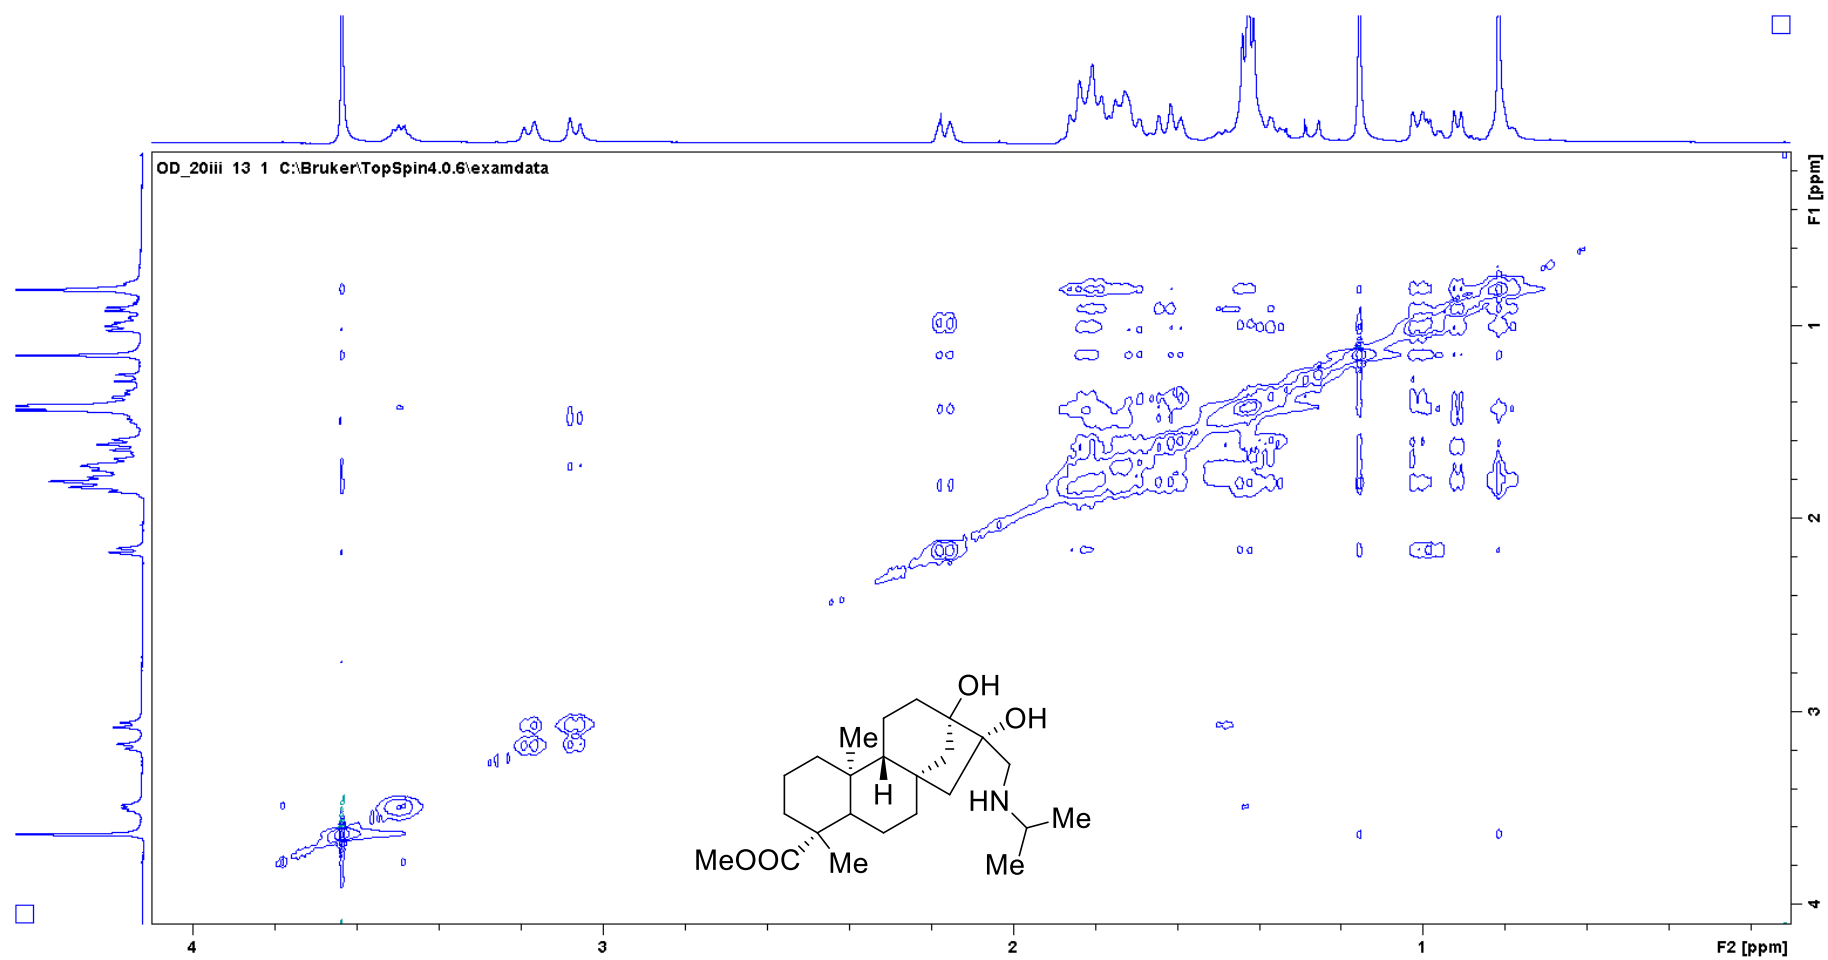

# HSQC of compound 15

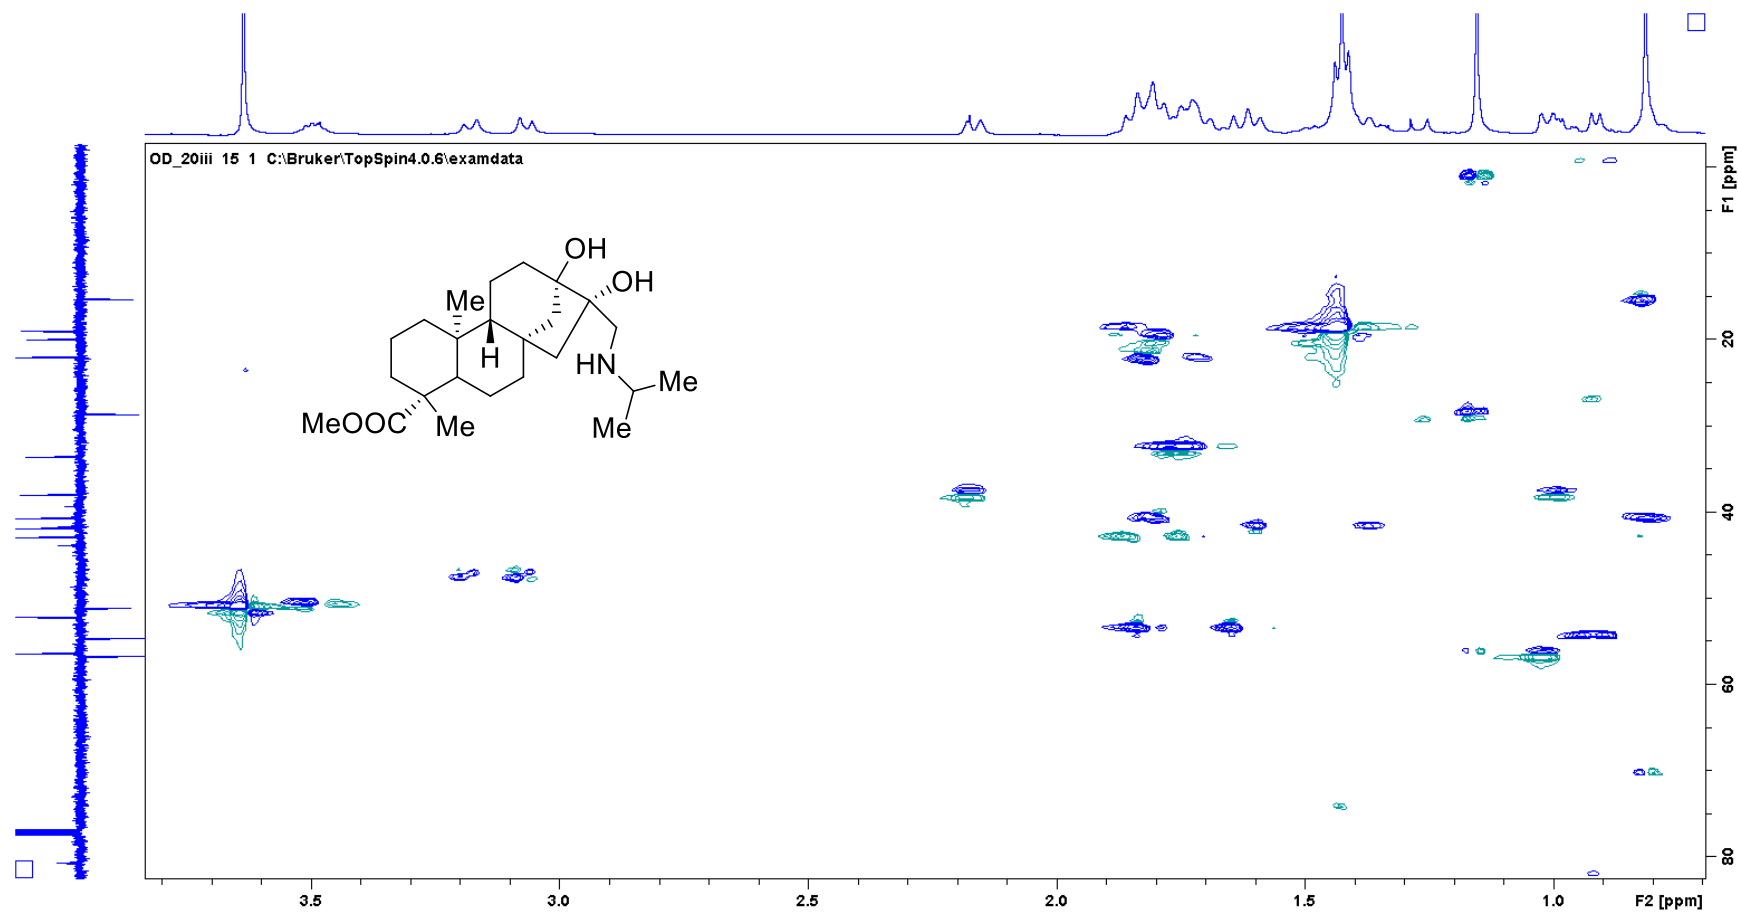

HMBC of compound 15

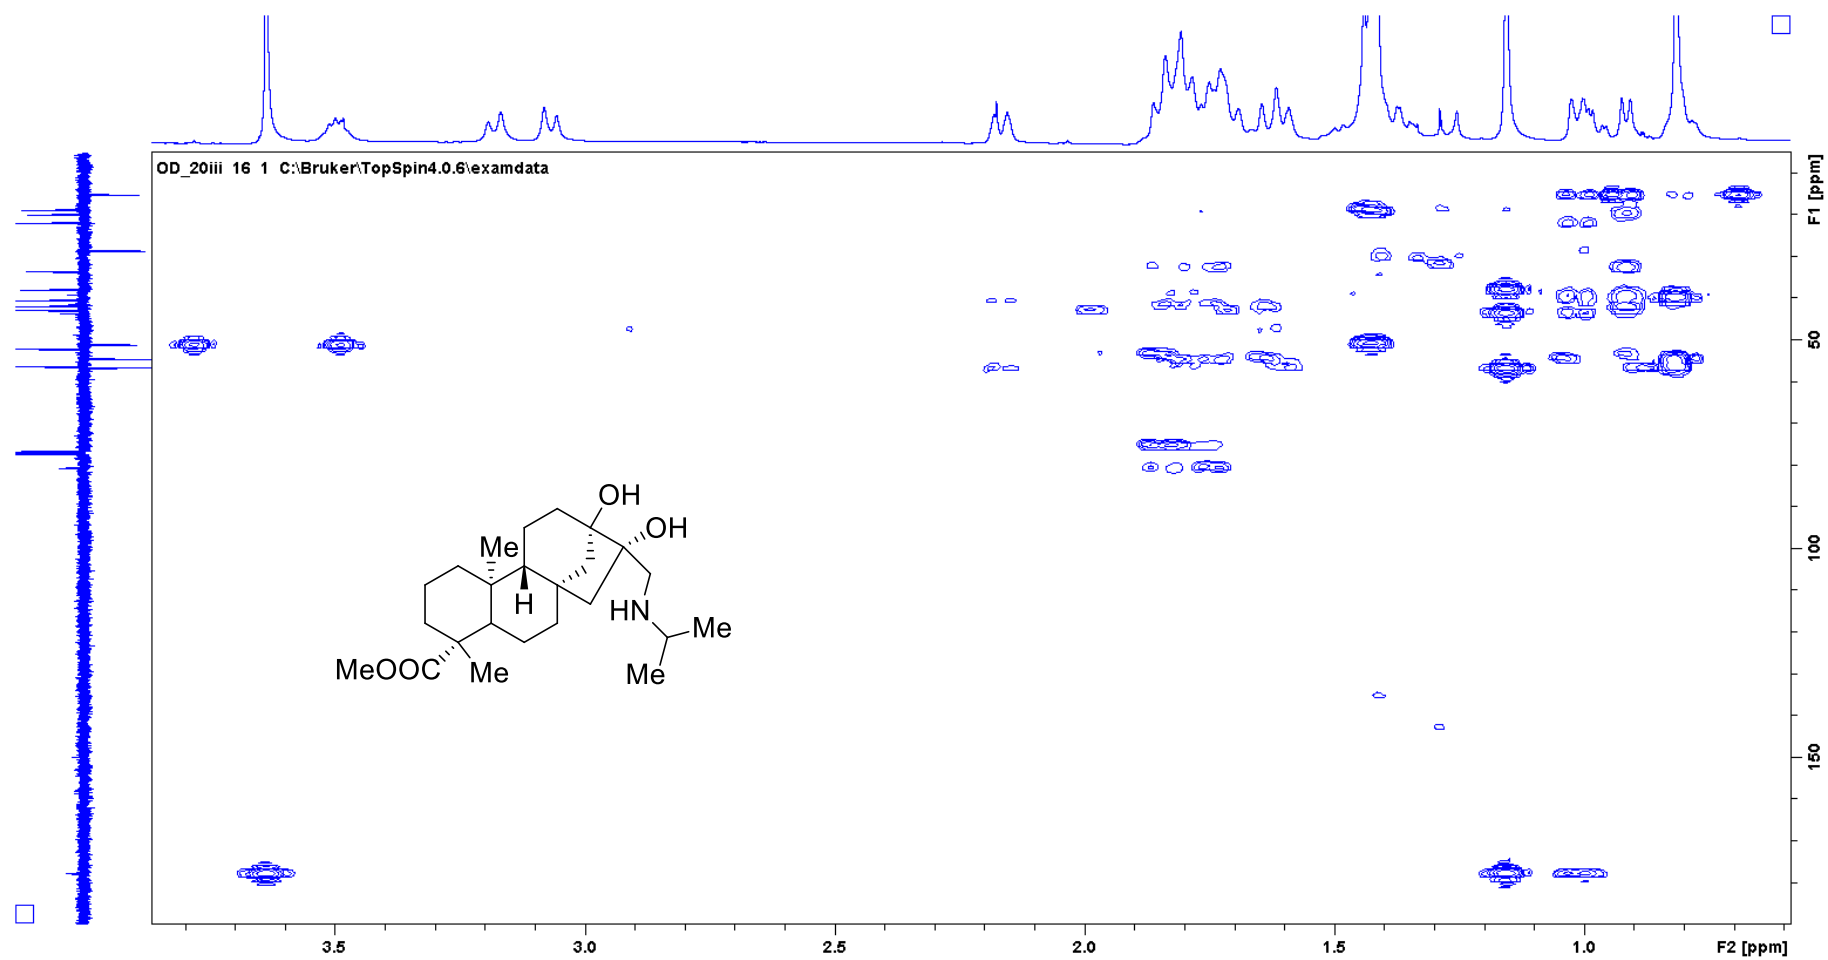



<sup>1</sup>H-NMR of compound 16

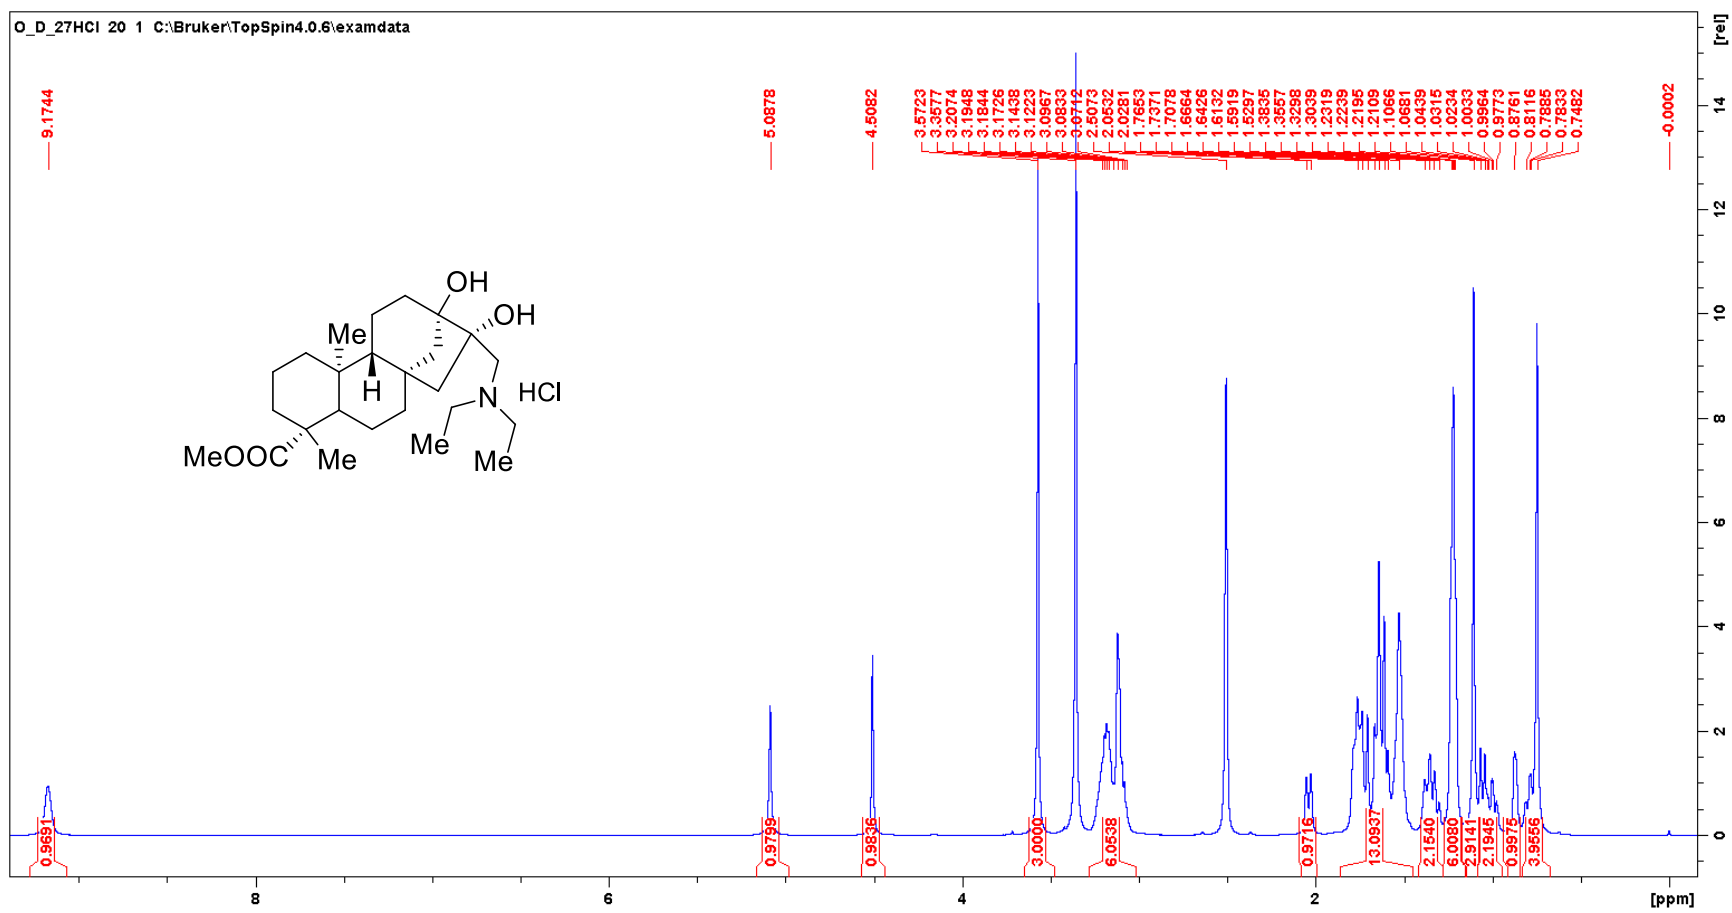

<sup>13</sup>C-NMR of compound 16

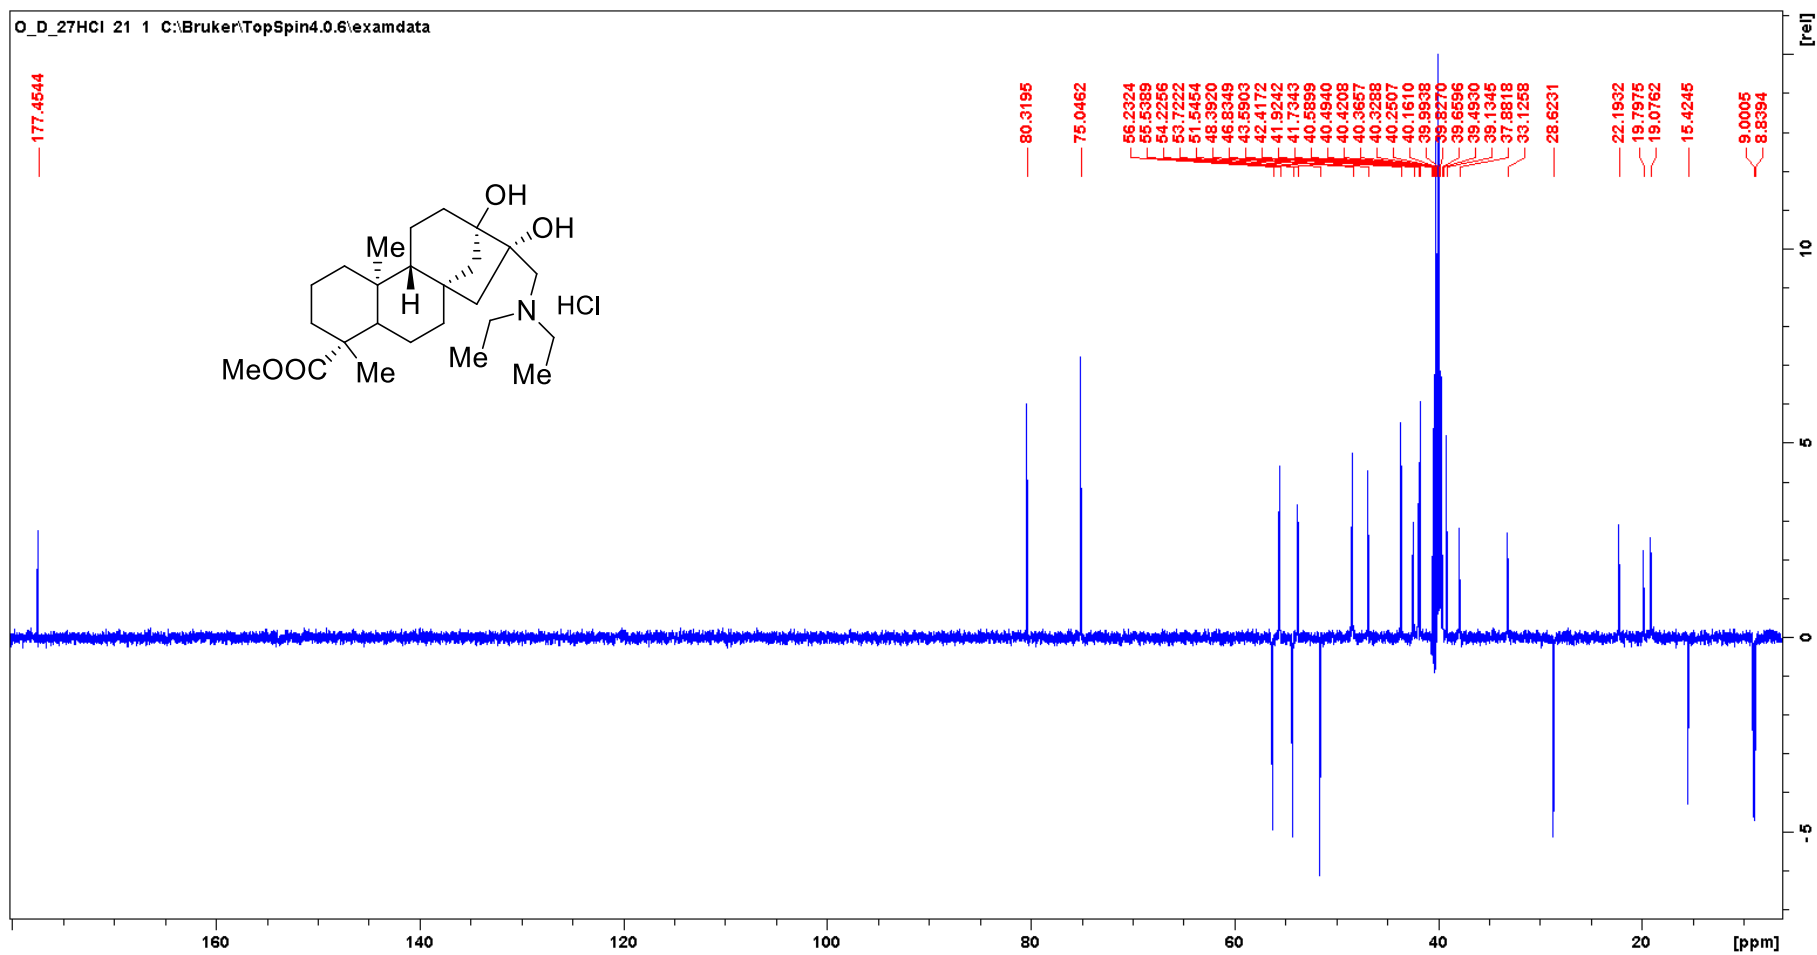

COSY of compound 16

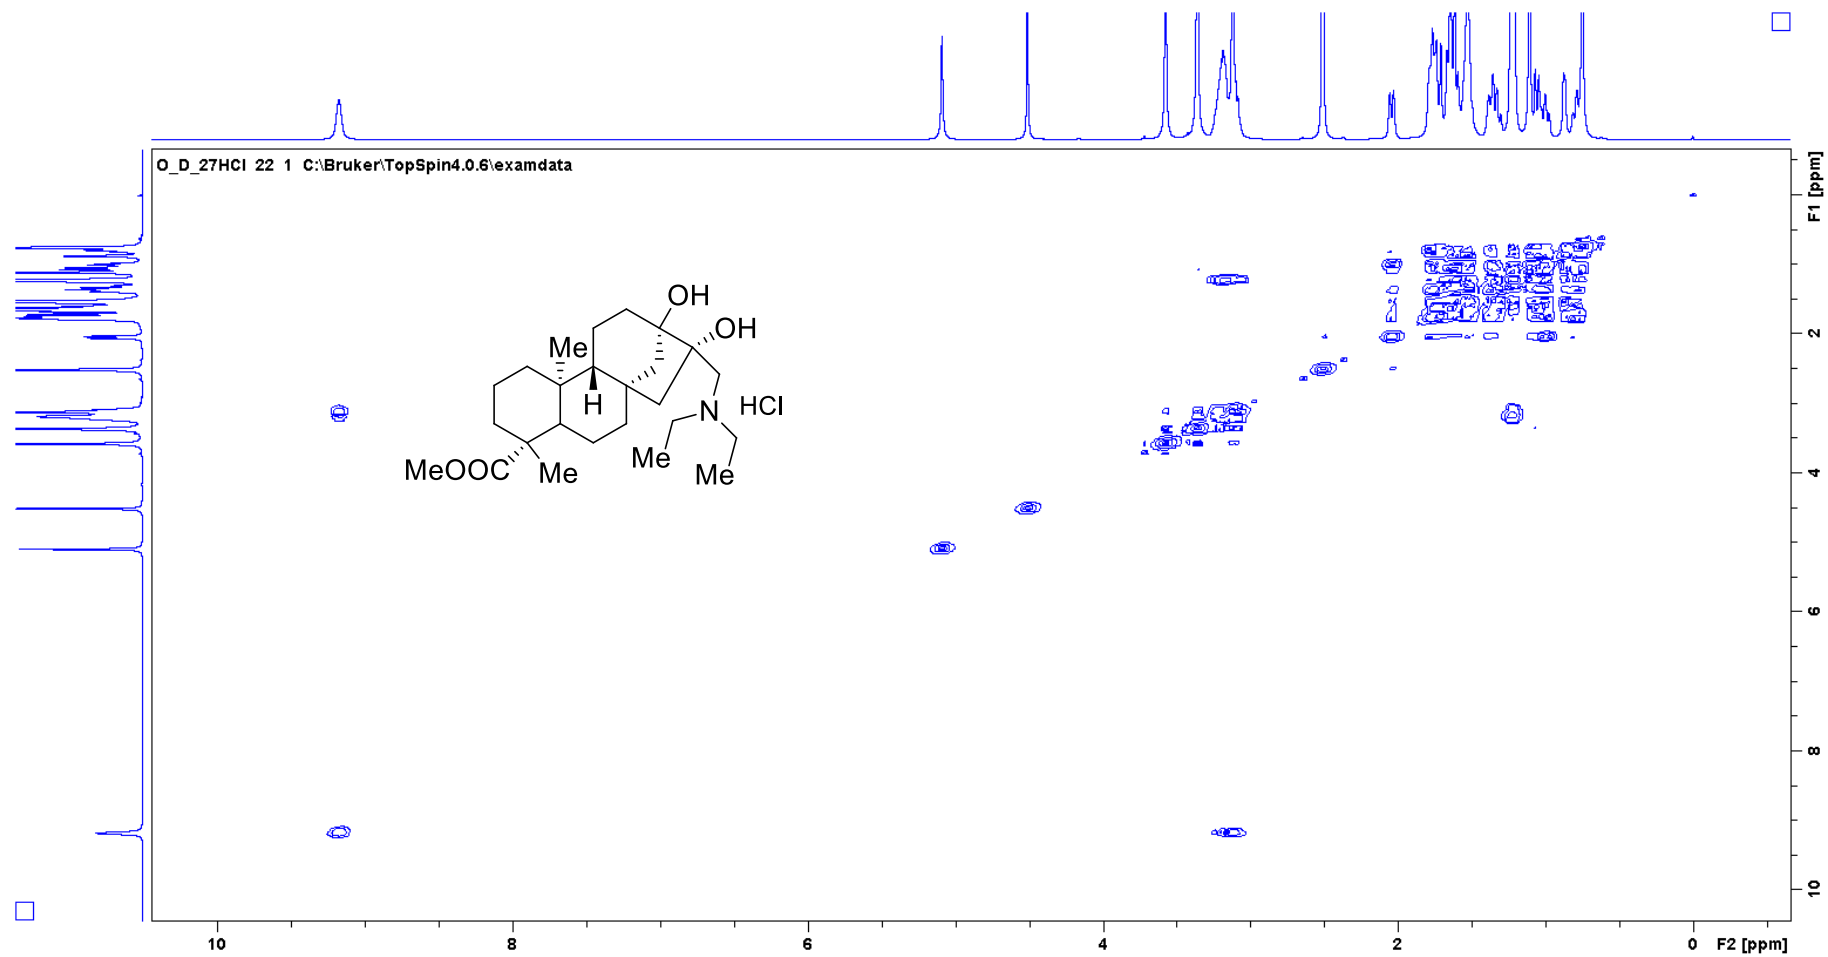

NOESY of compound 16

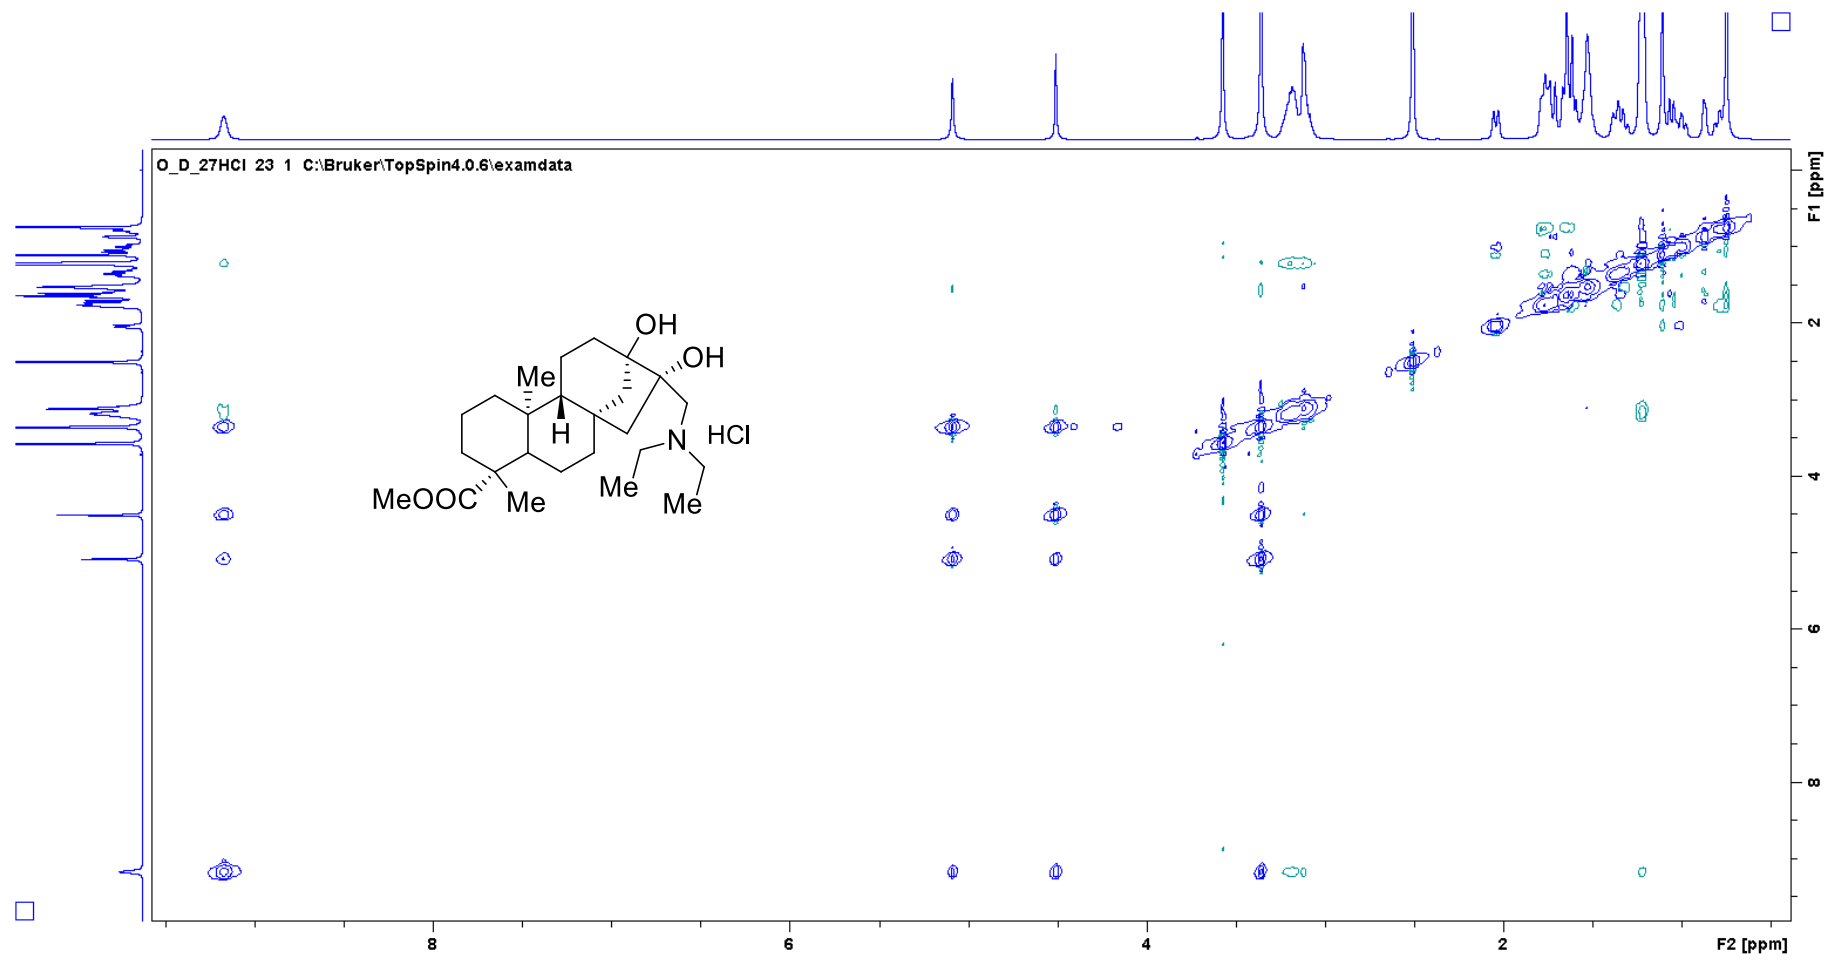

HSQC of compound 16

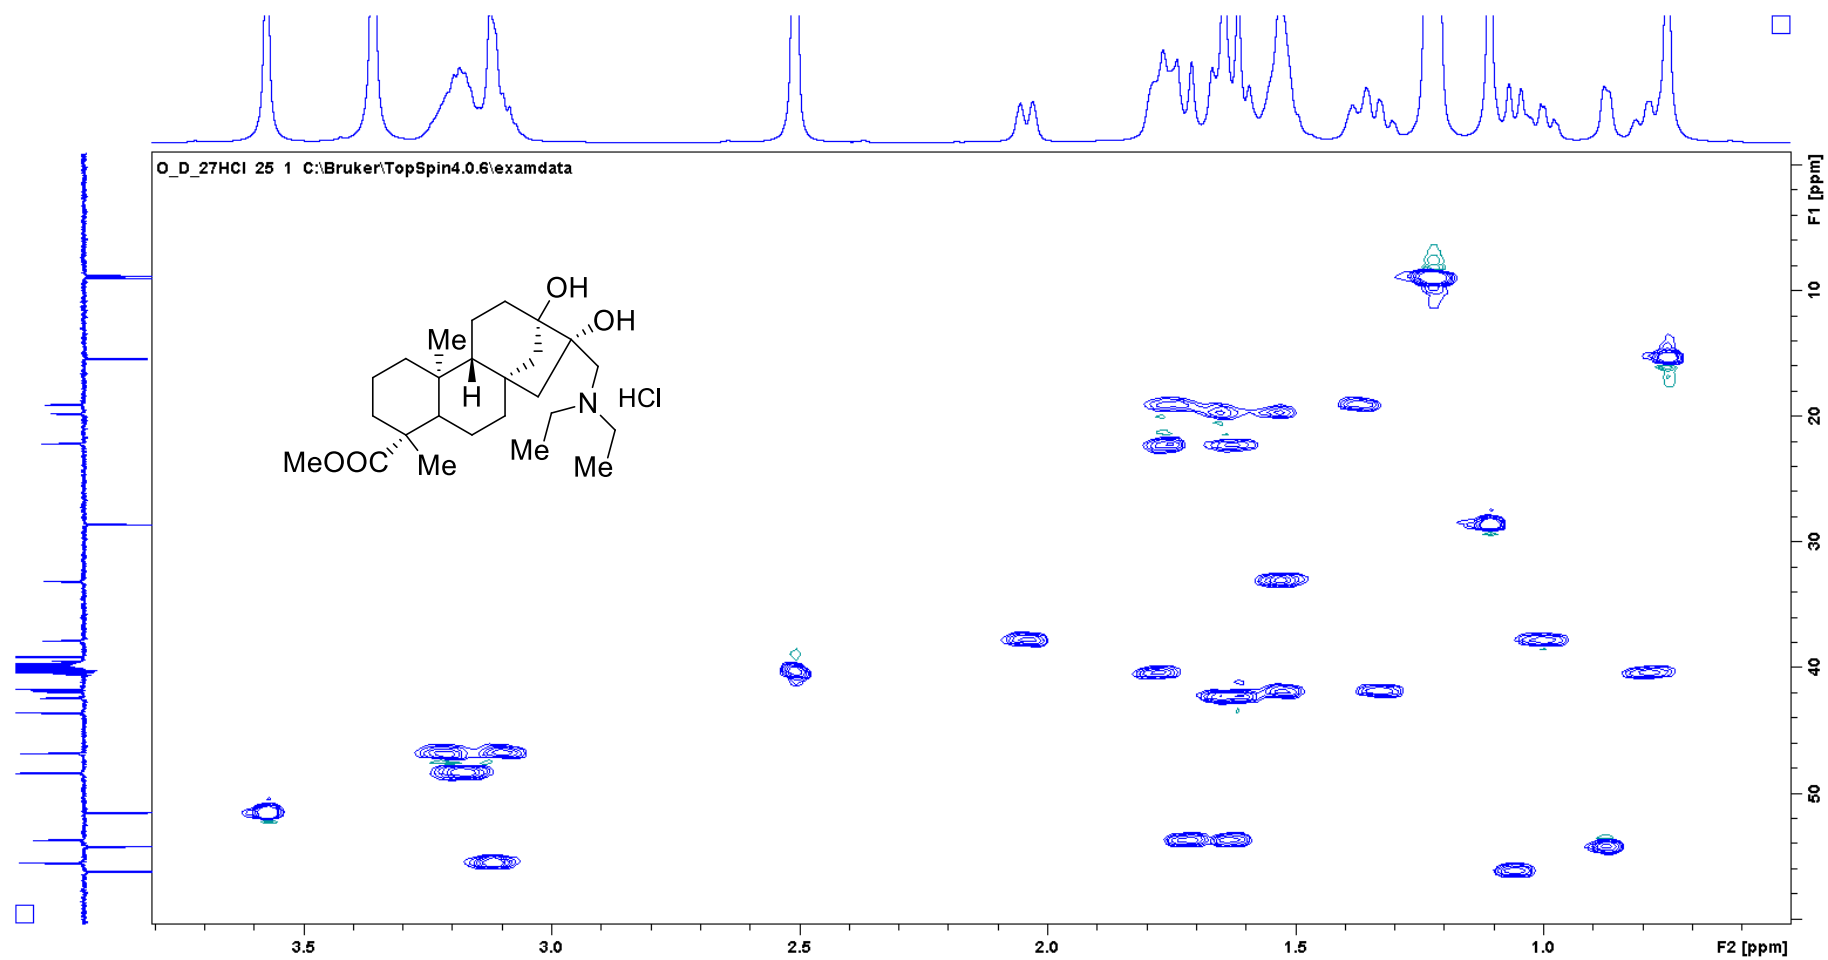

# HMBC of compound 16

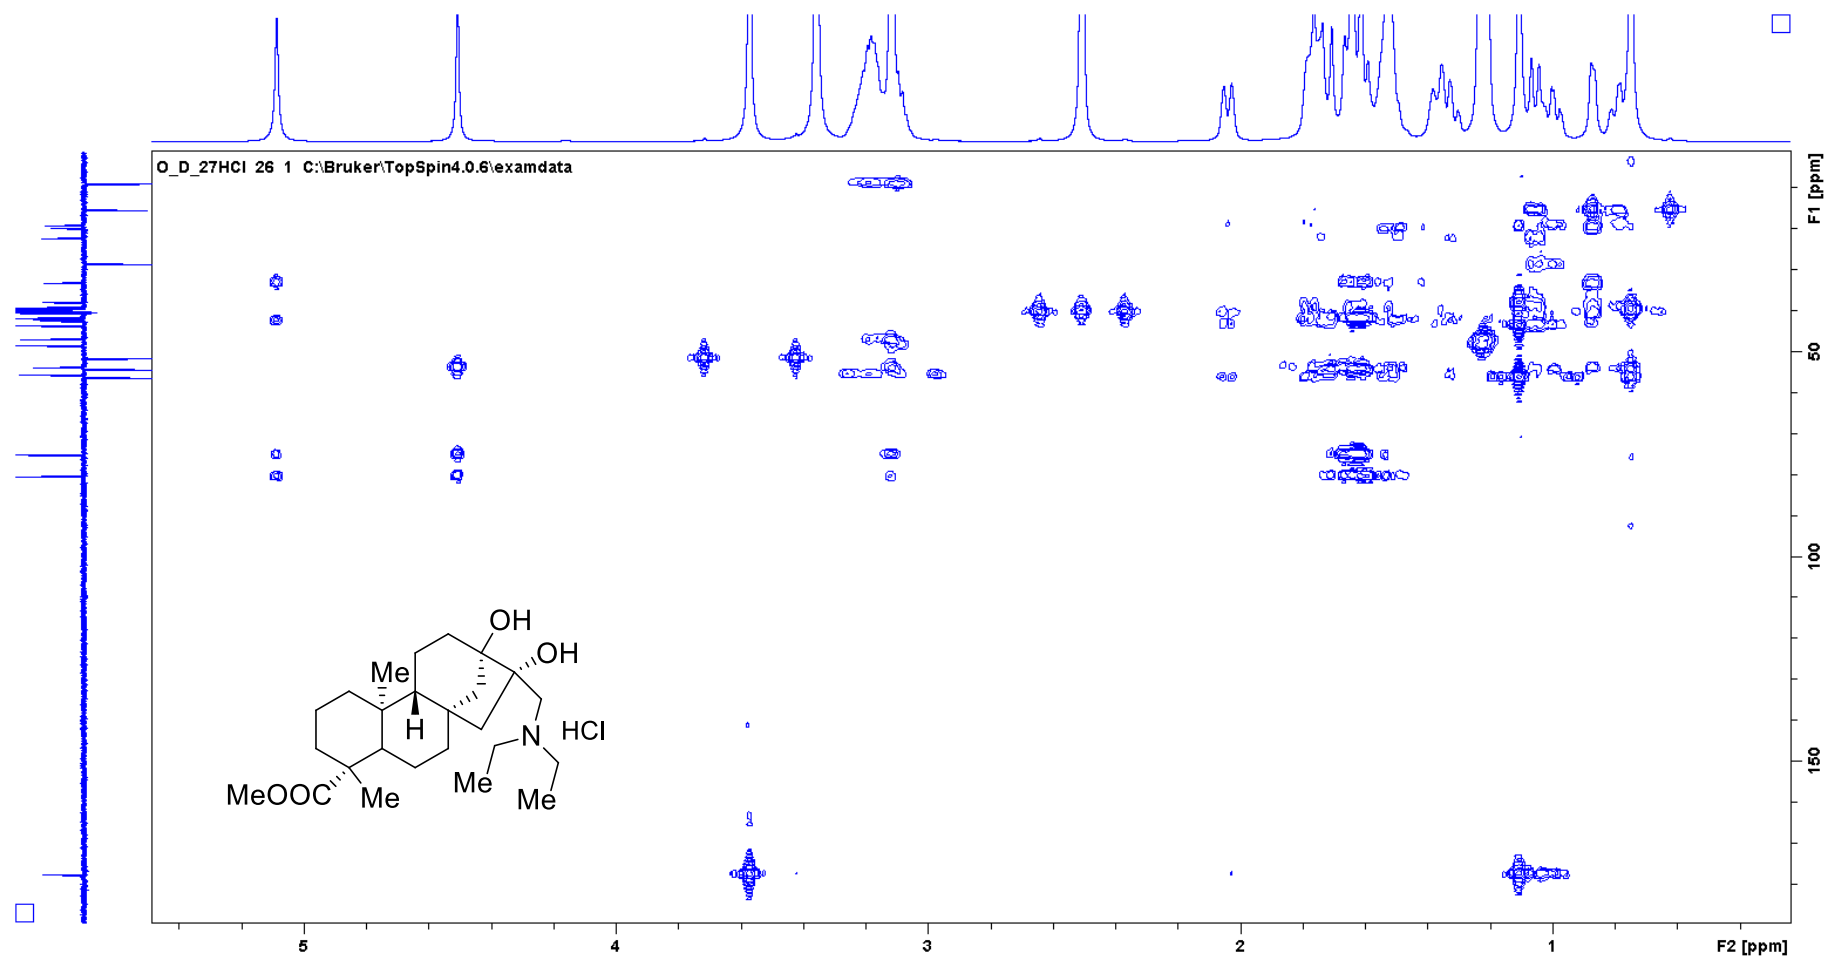

<sup>1</sup>H-NMR of compound 17

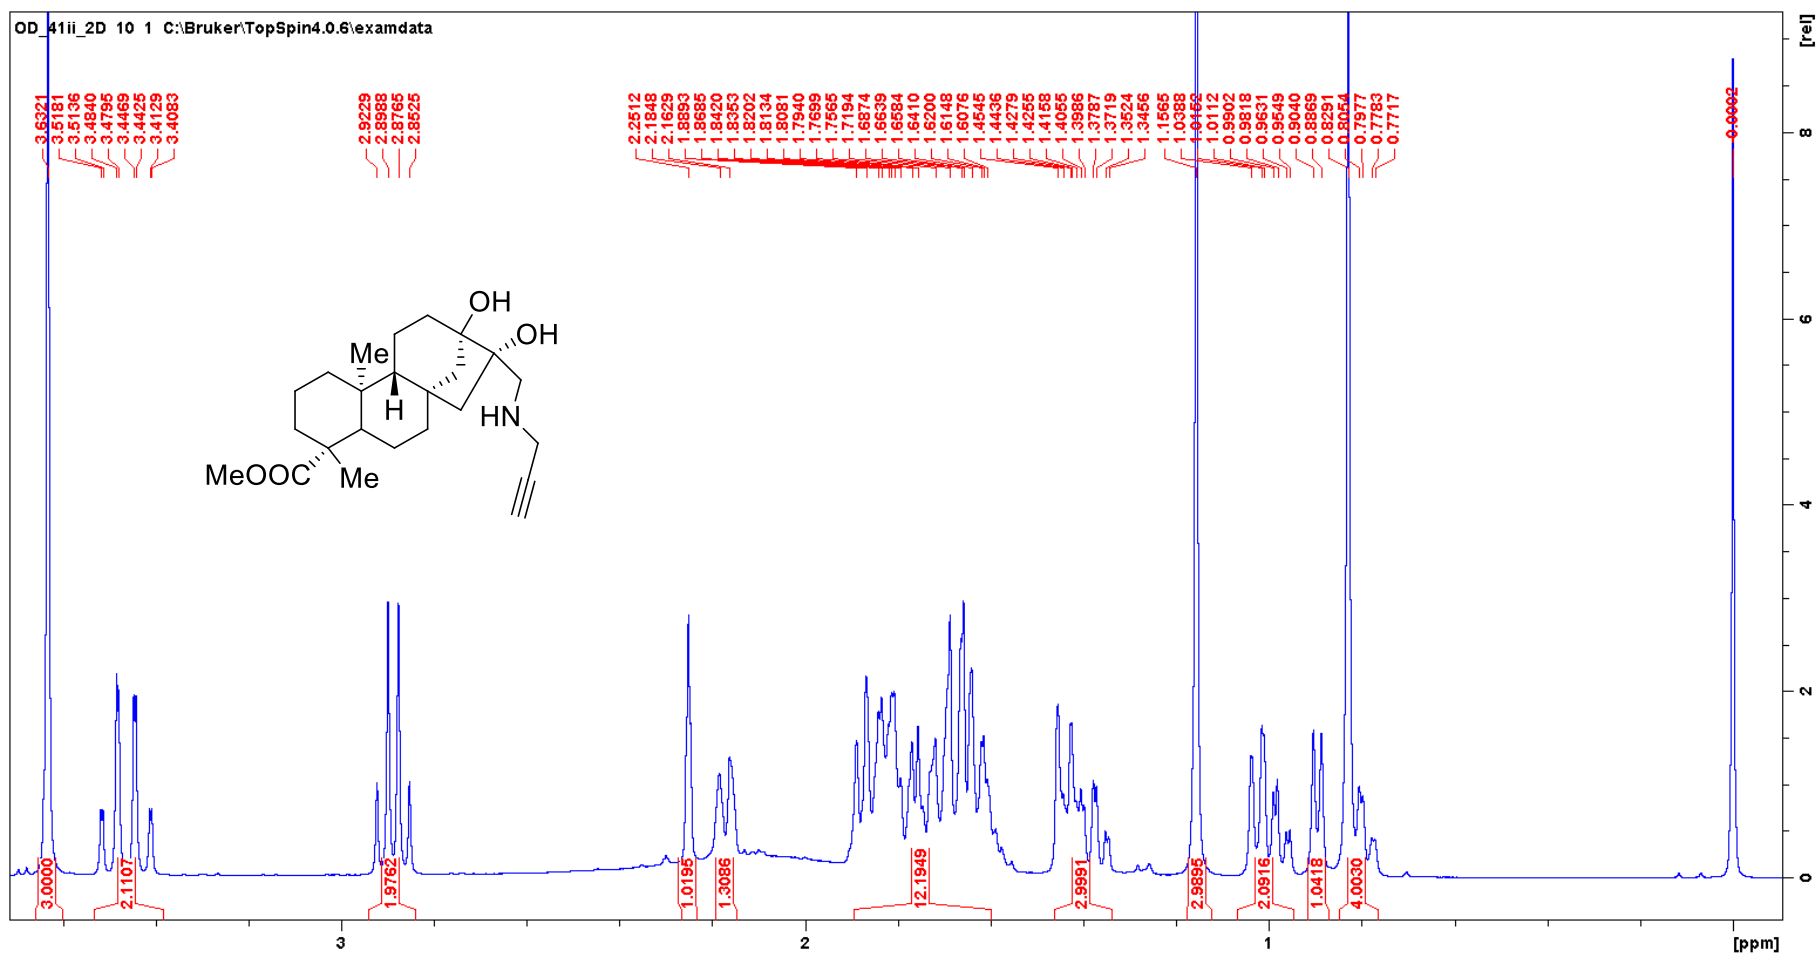

<sup>13</sup>C-NMR of compound 17

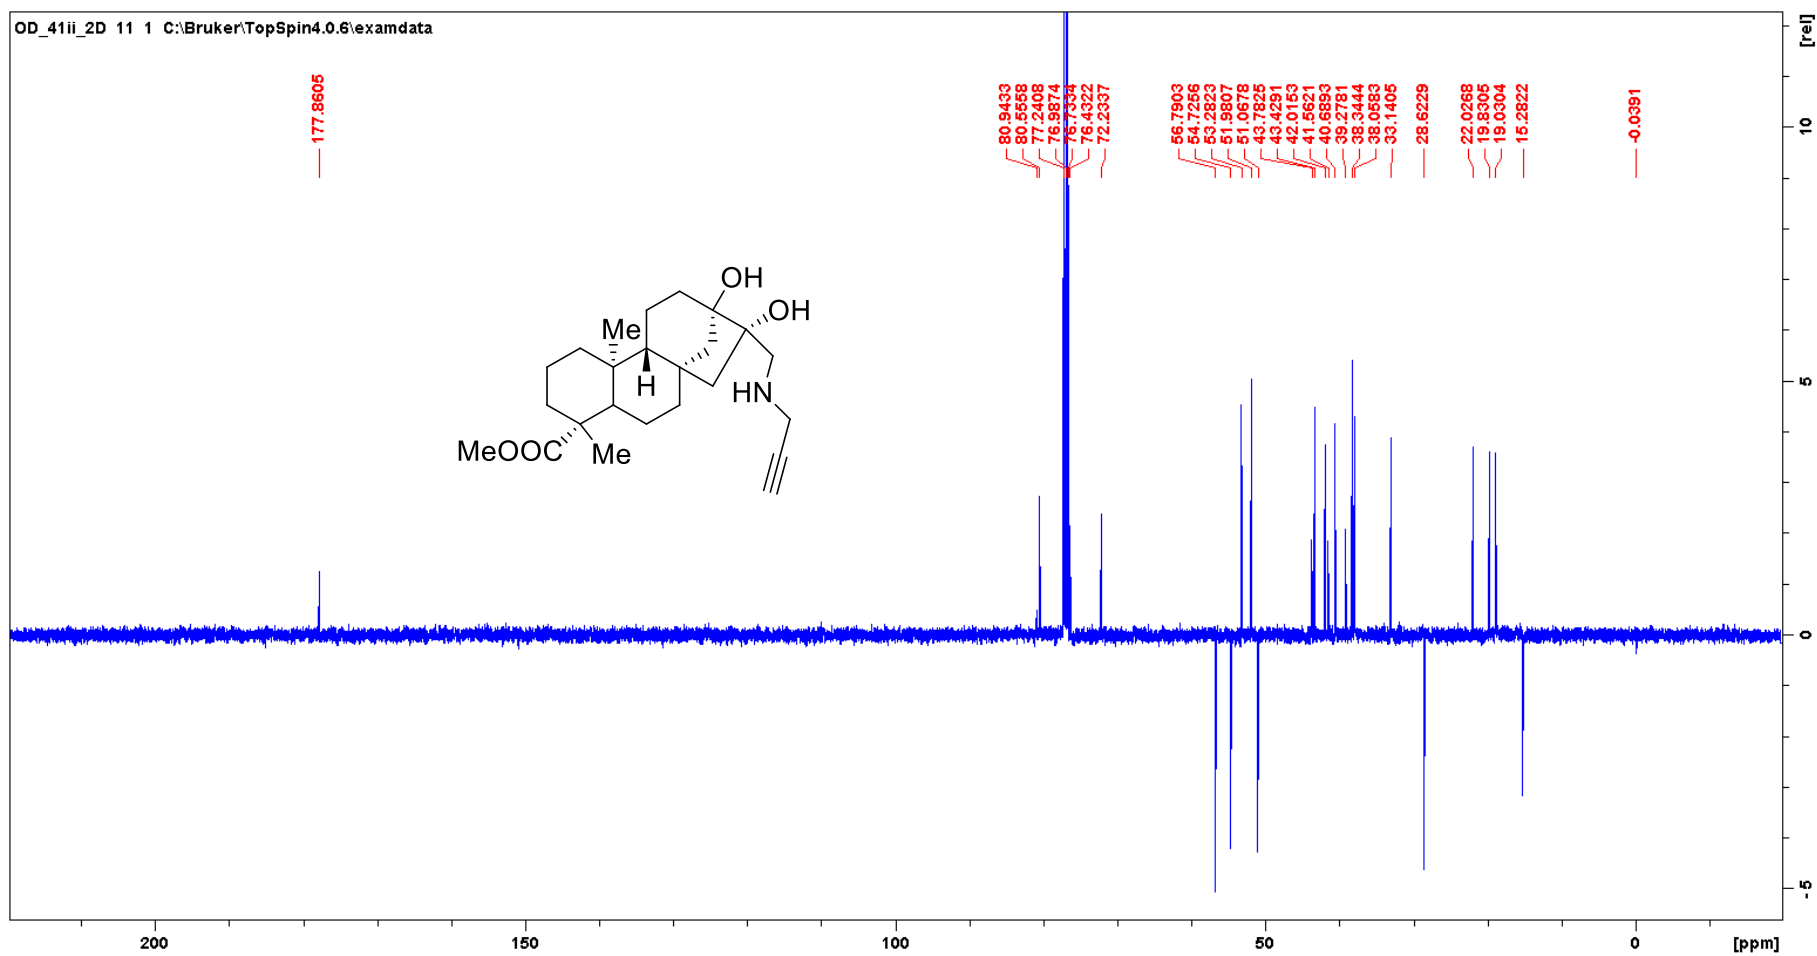



COSY of compound 17

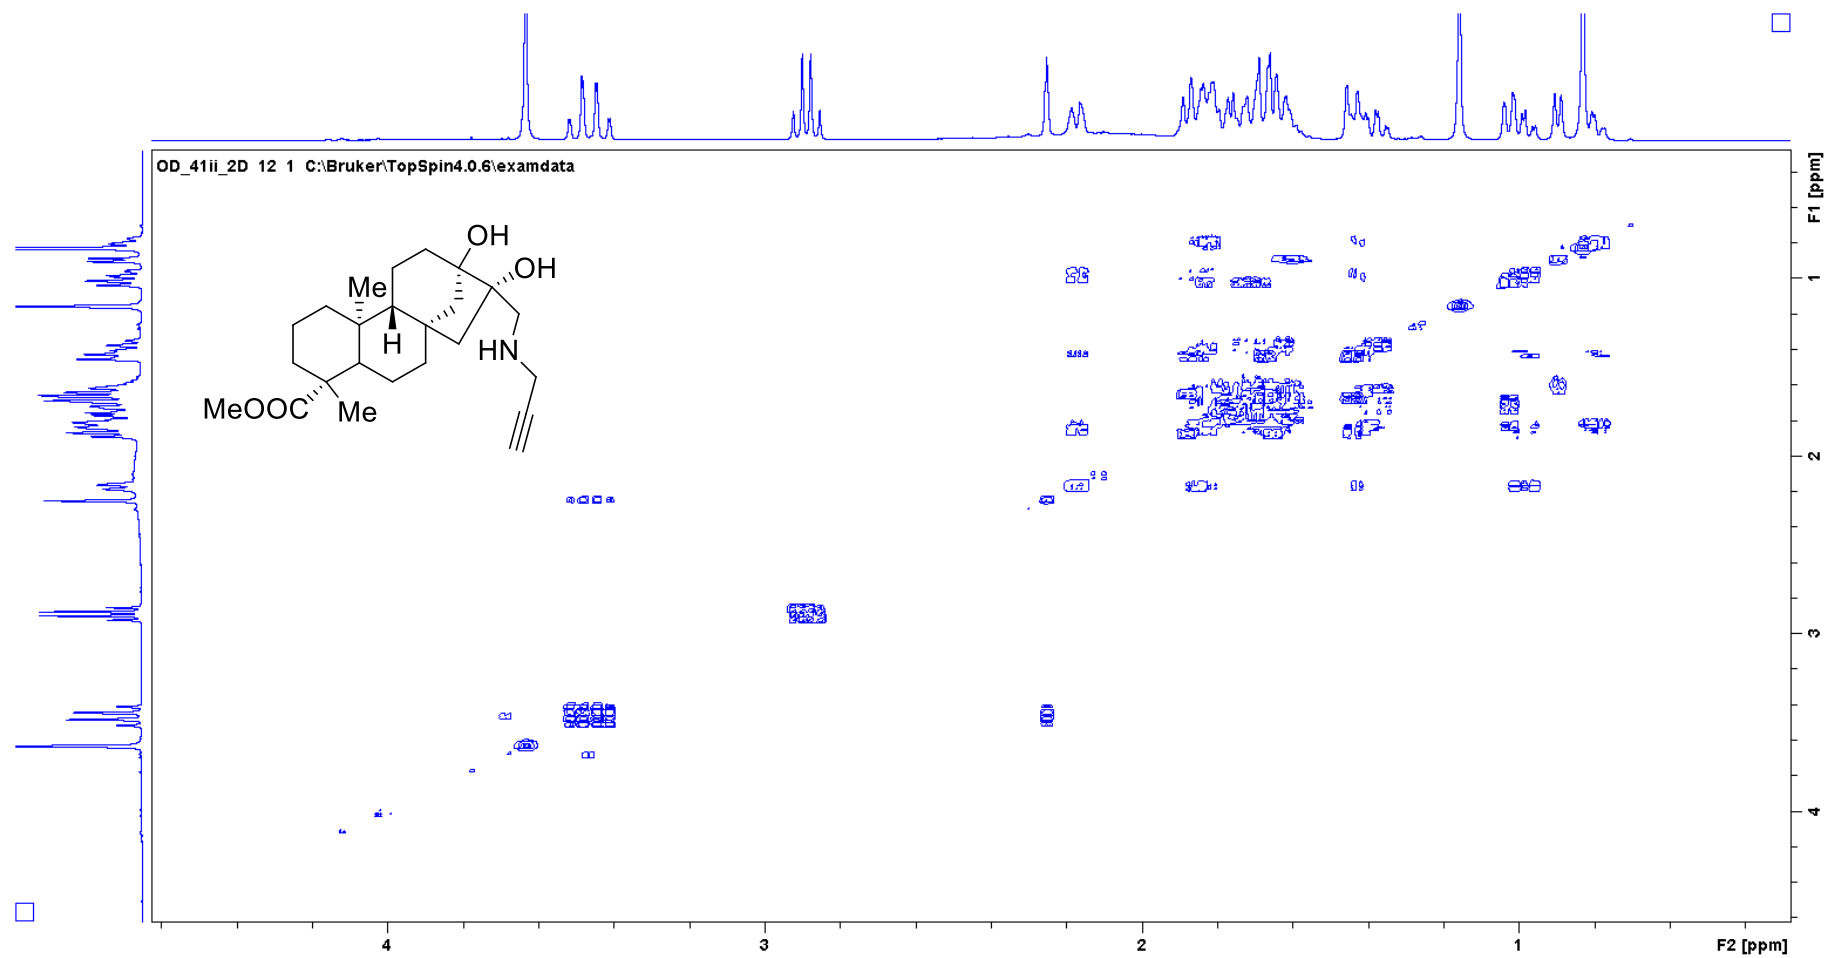

NOESY of compound 17

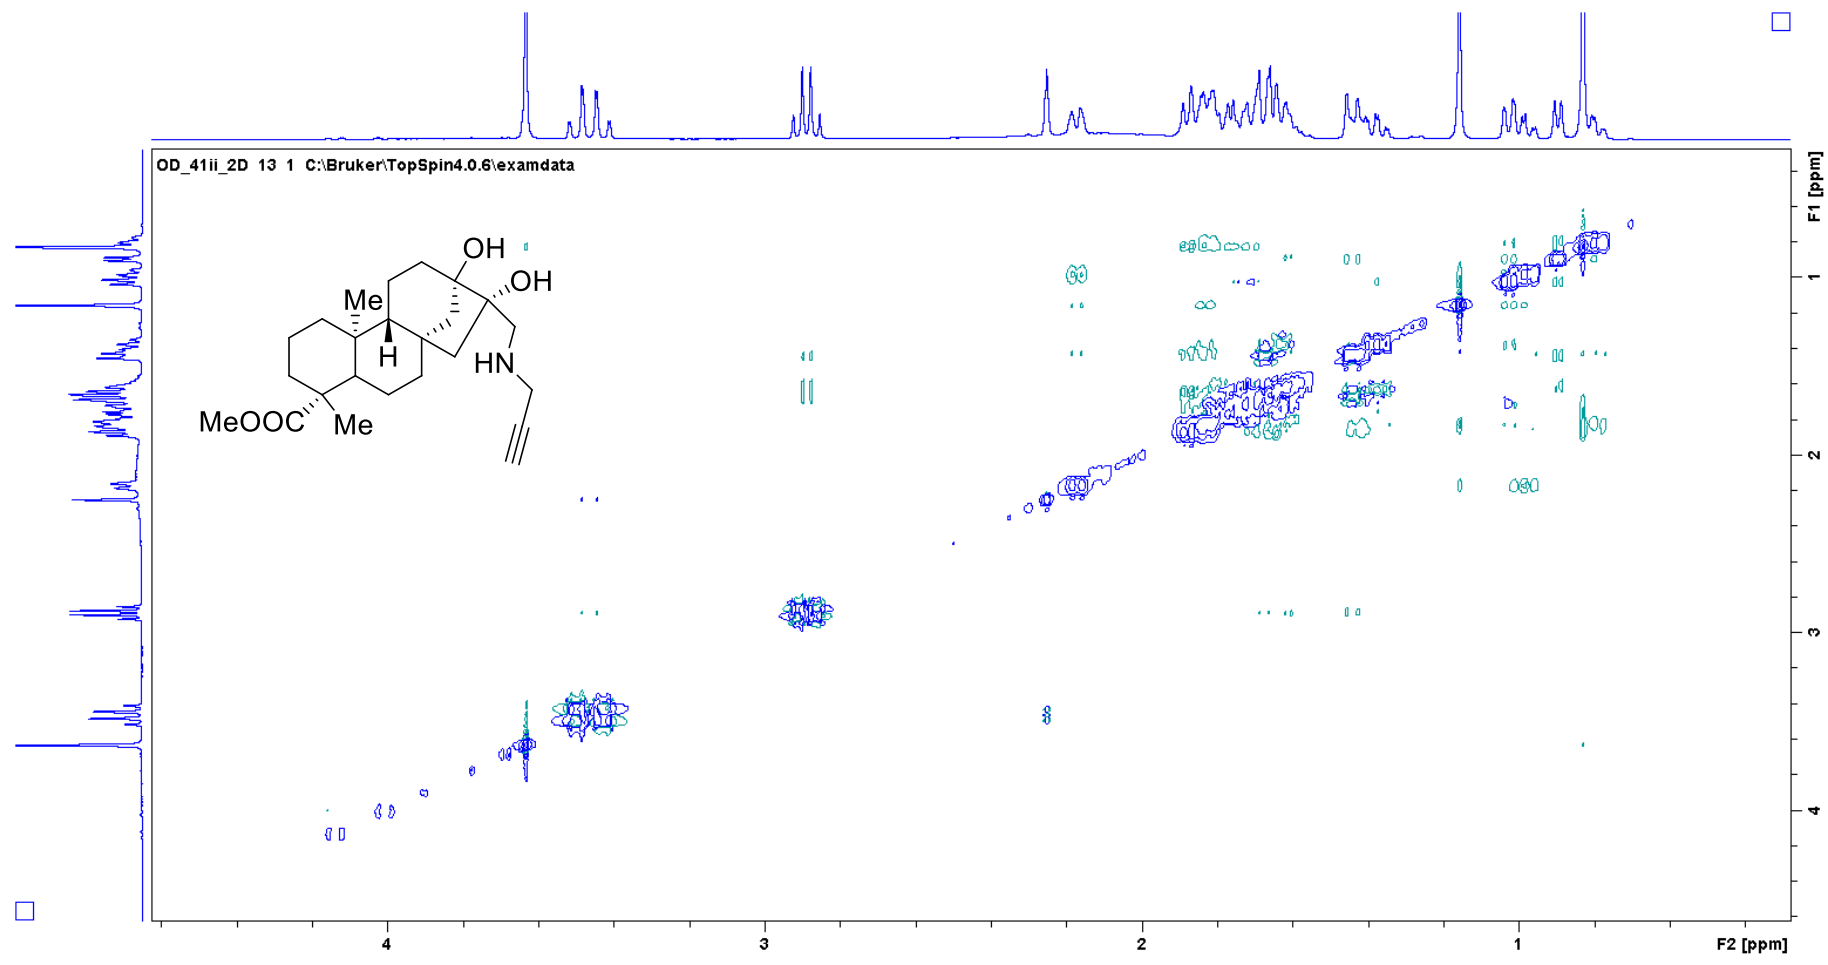

HSQC of compound 17

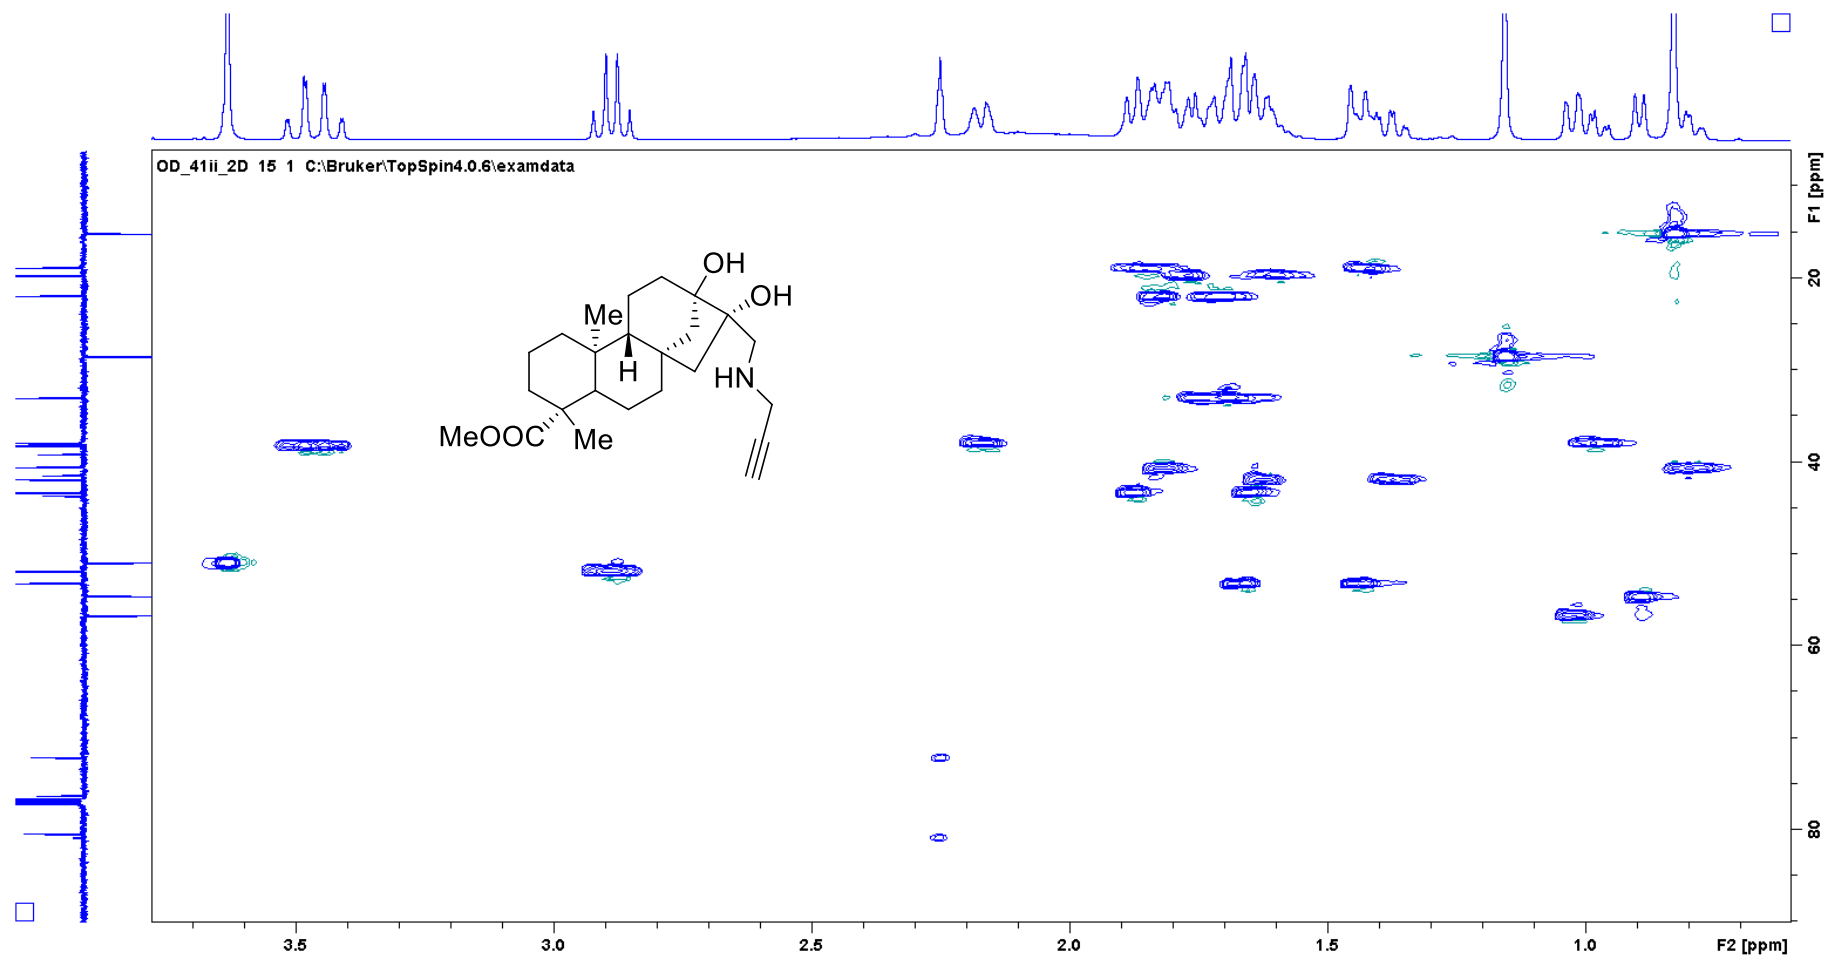

HMBC of compound 17

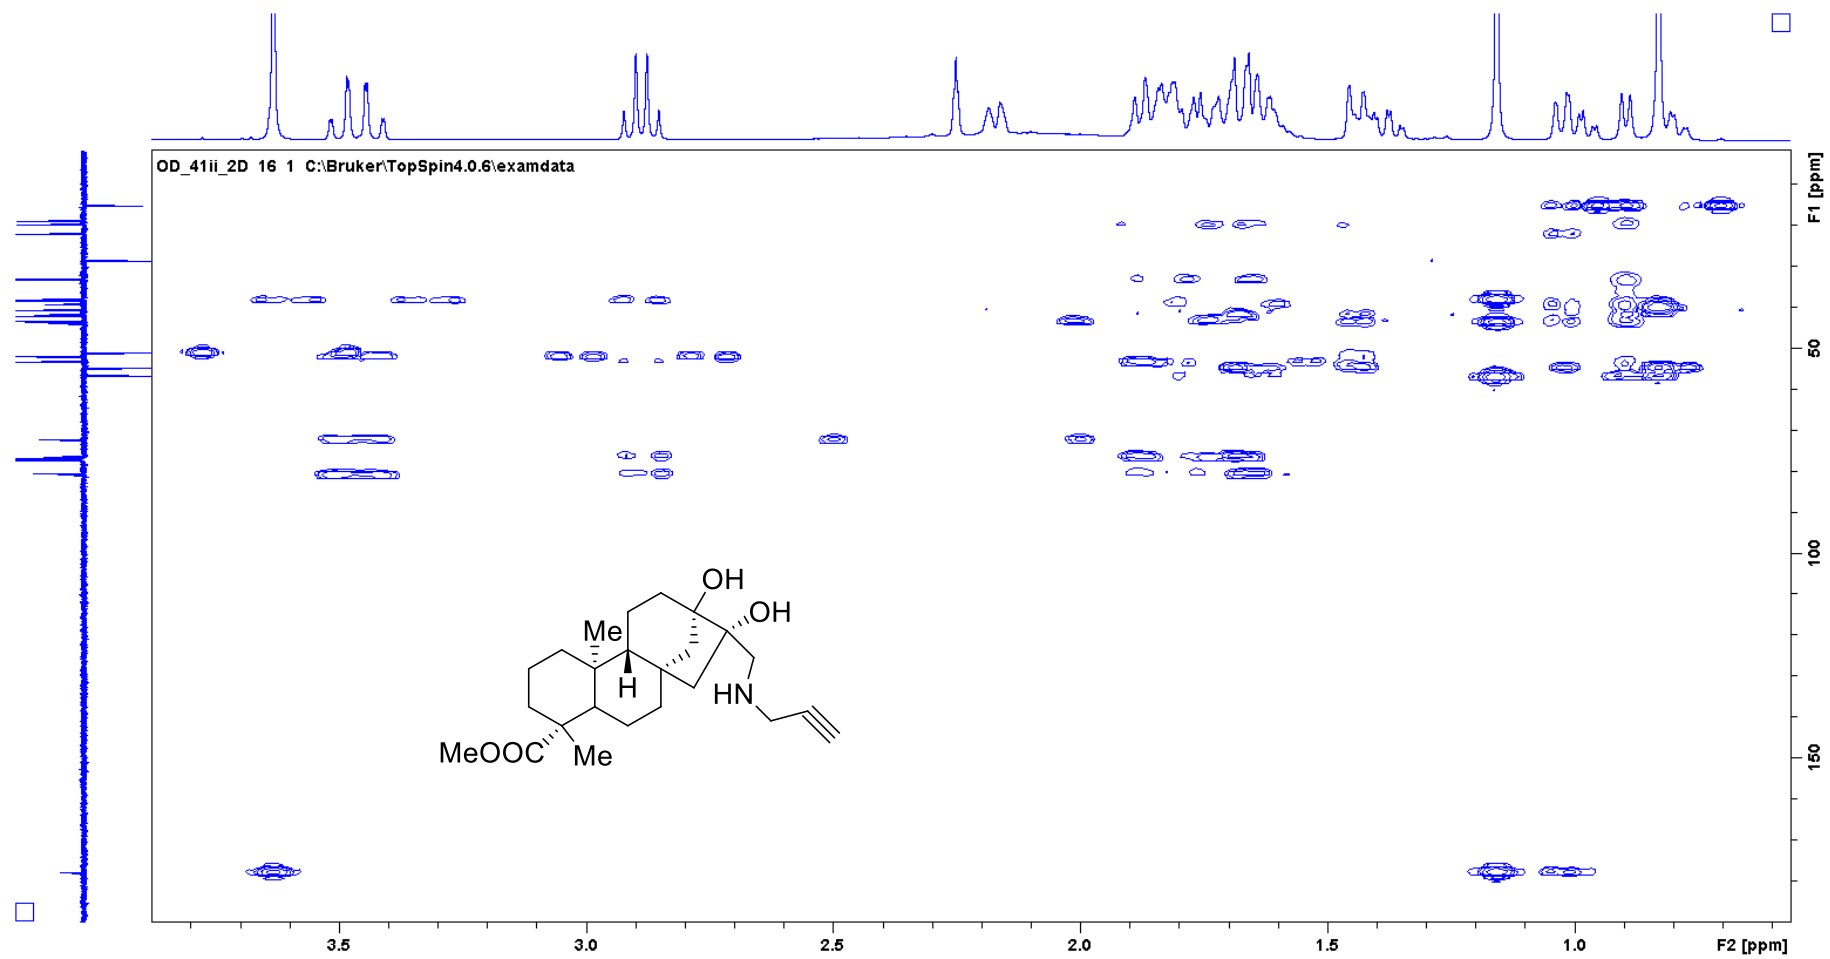

<sup>1</sup>H-NMR of compound 18

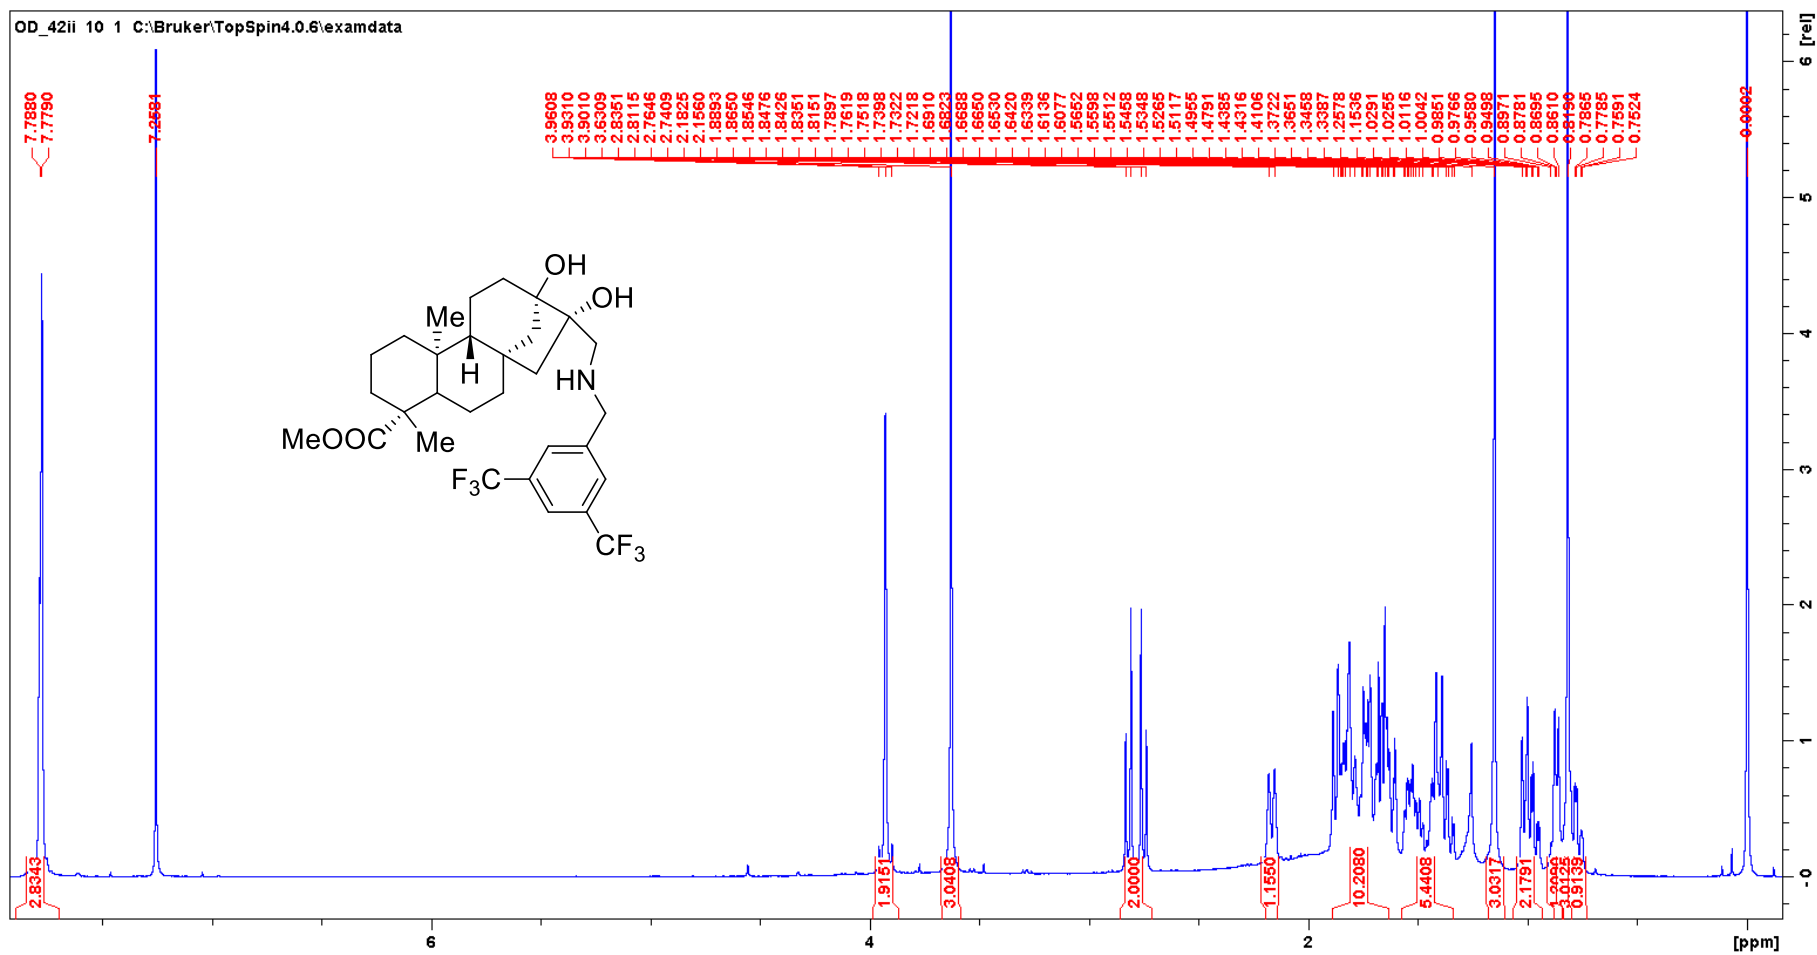

<sup>13</sup>C-NMR of compound 18

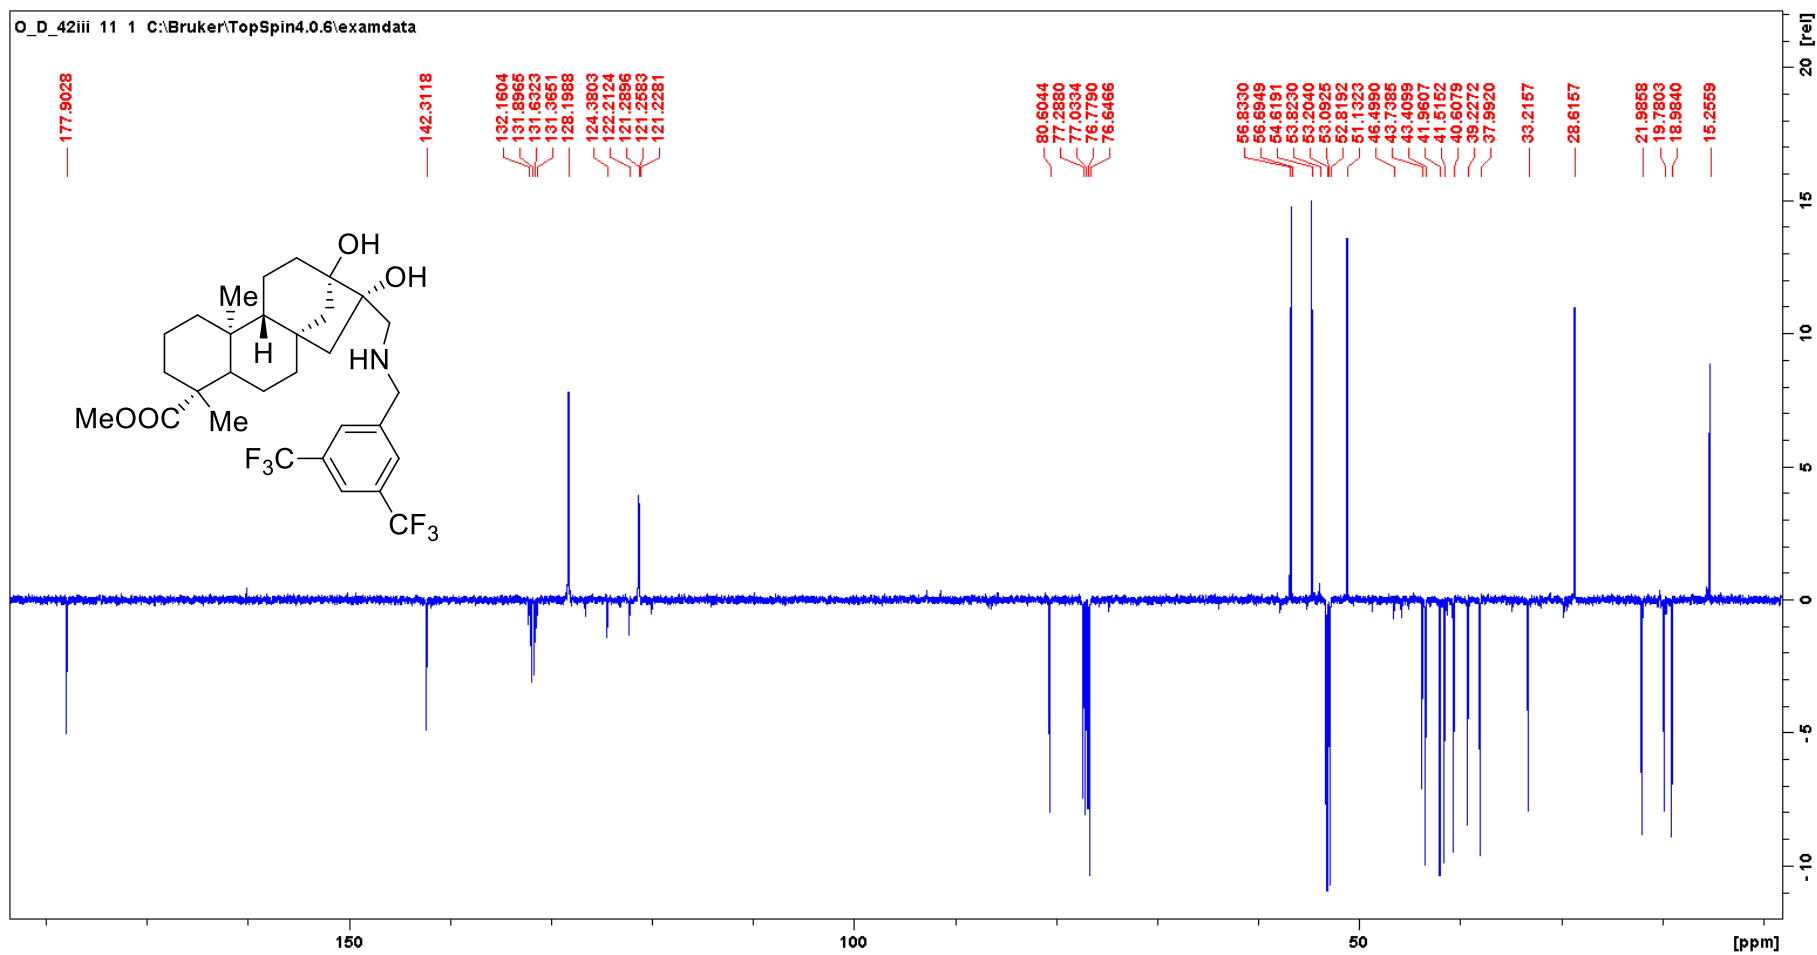

# HSQC of compound of 18

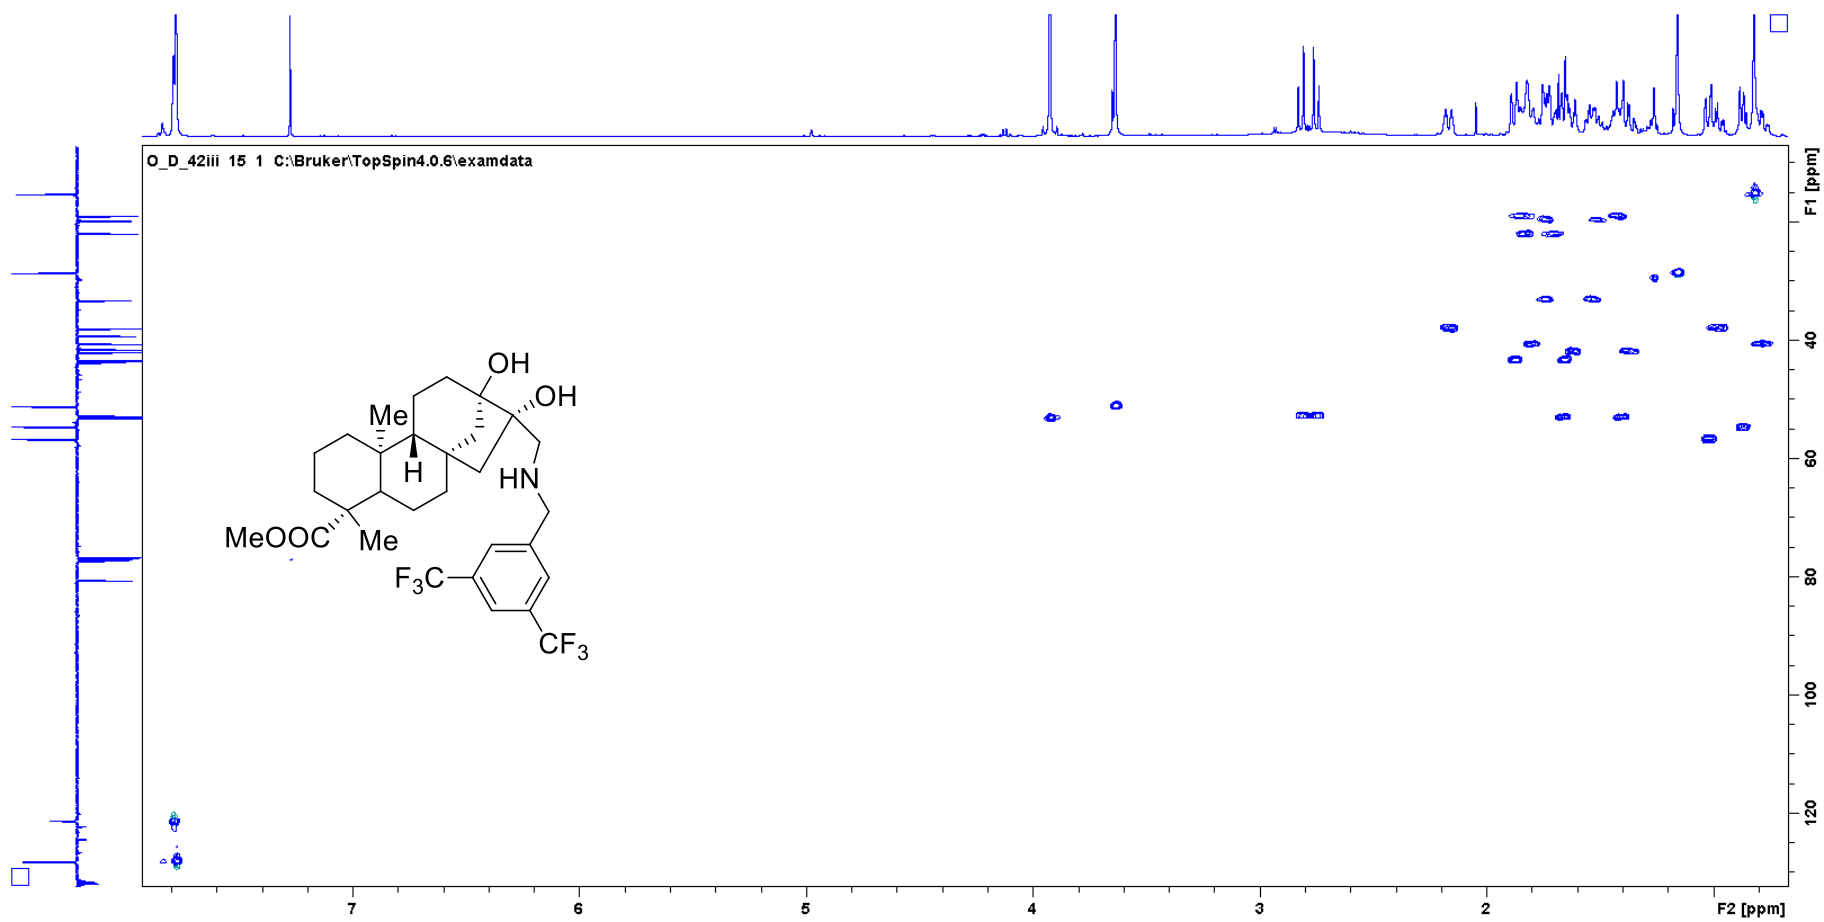

# HMBC of compound of 18

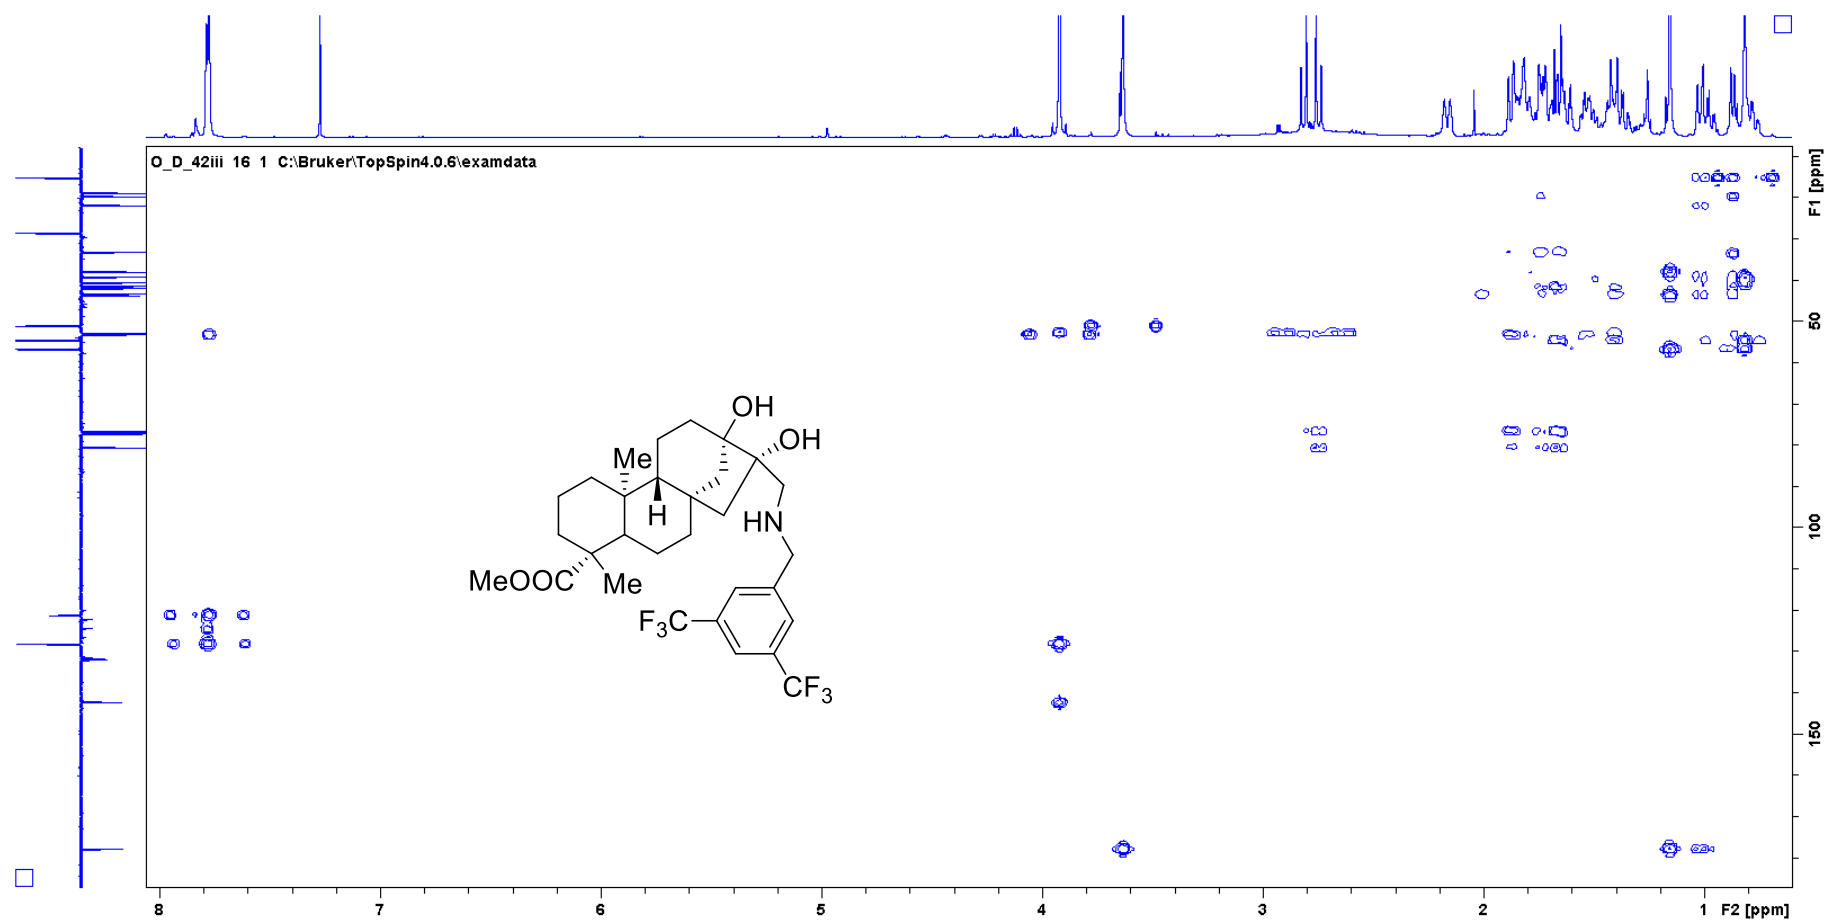



<sup>1</sup>H-NMR of compound of 19

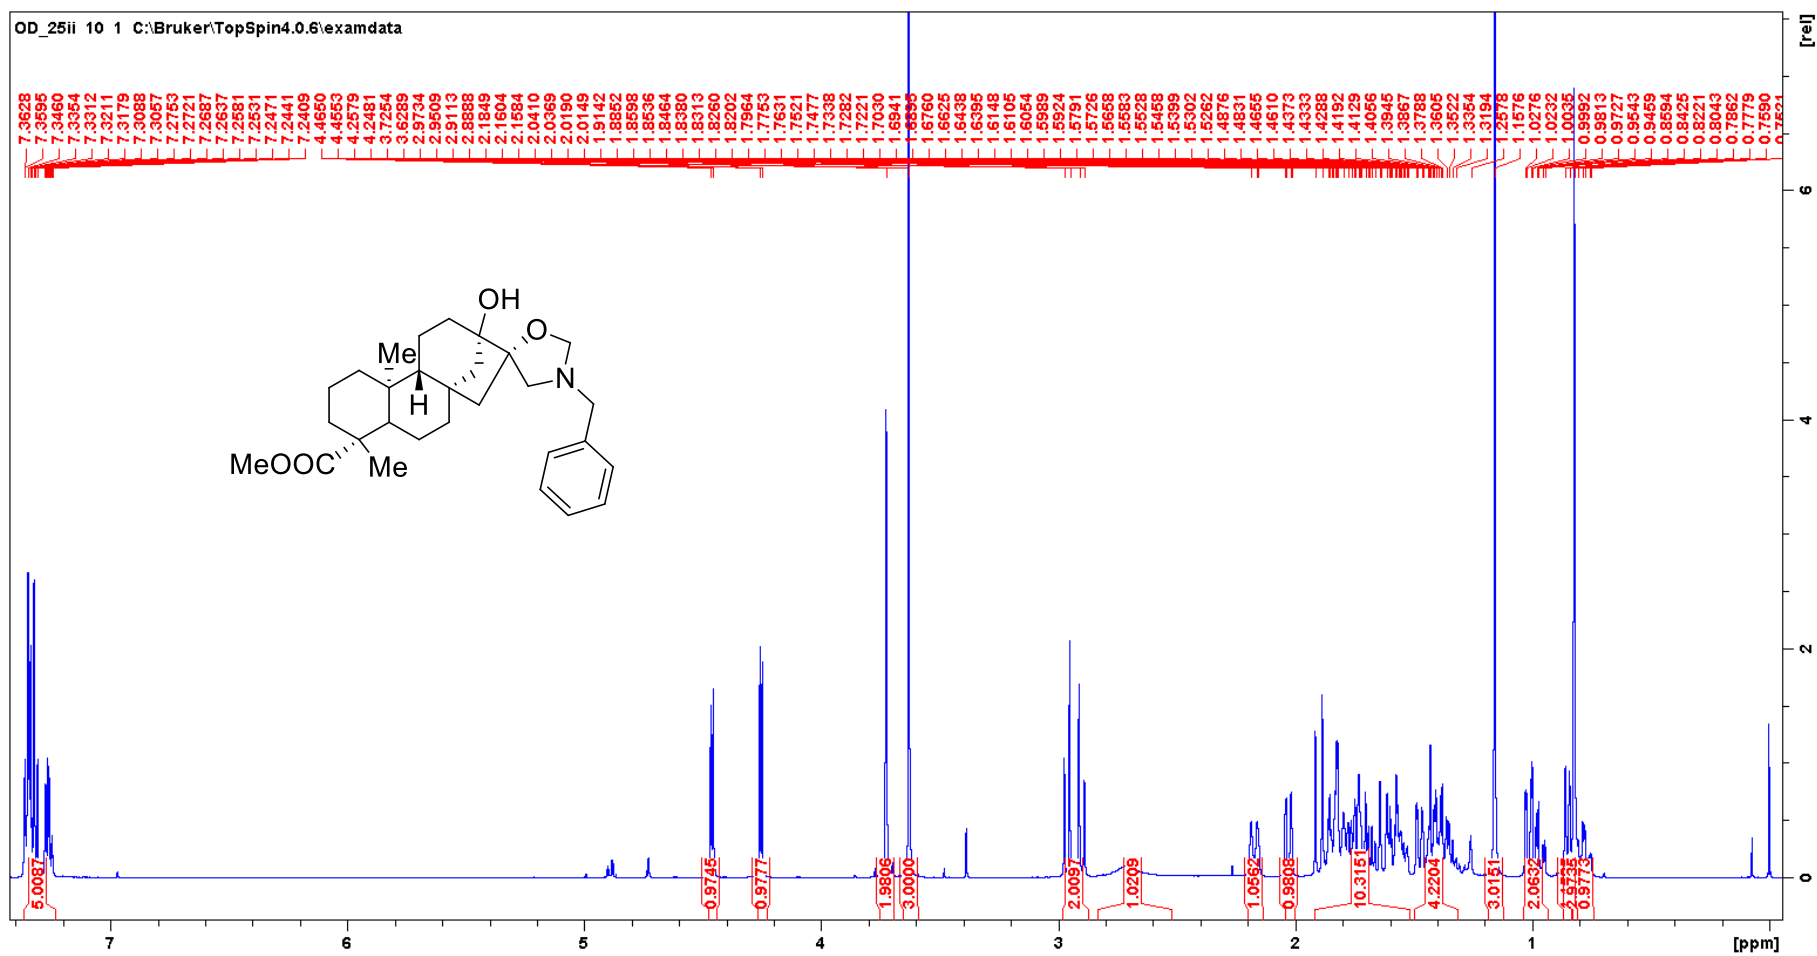

<sup>13</sup>C-NMR of compound 19

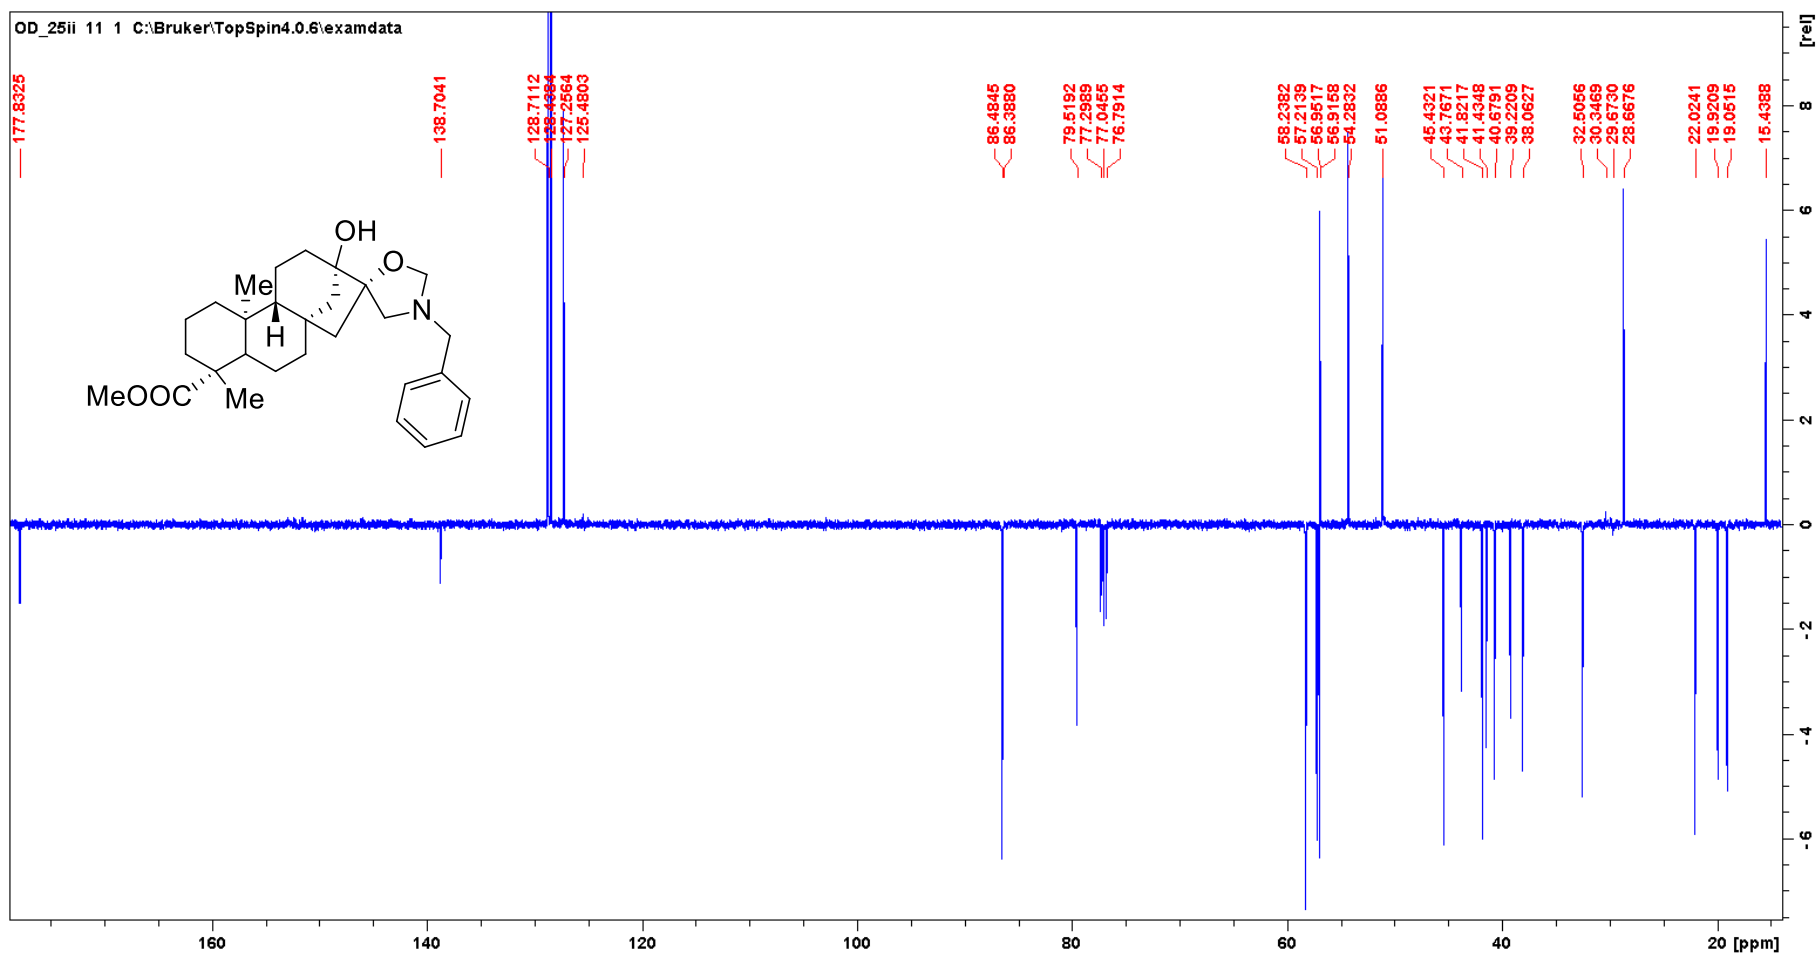

COSY of compound 19

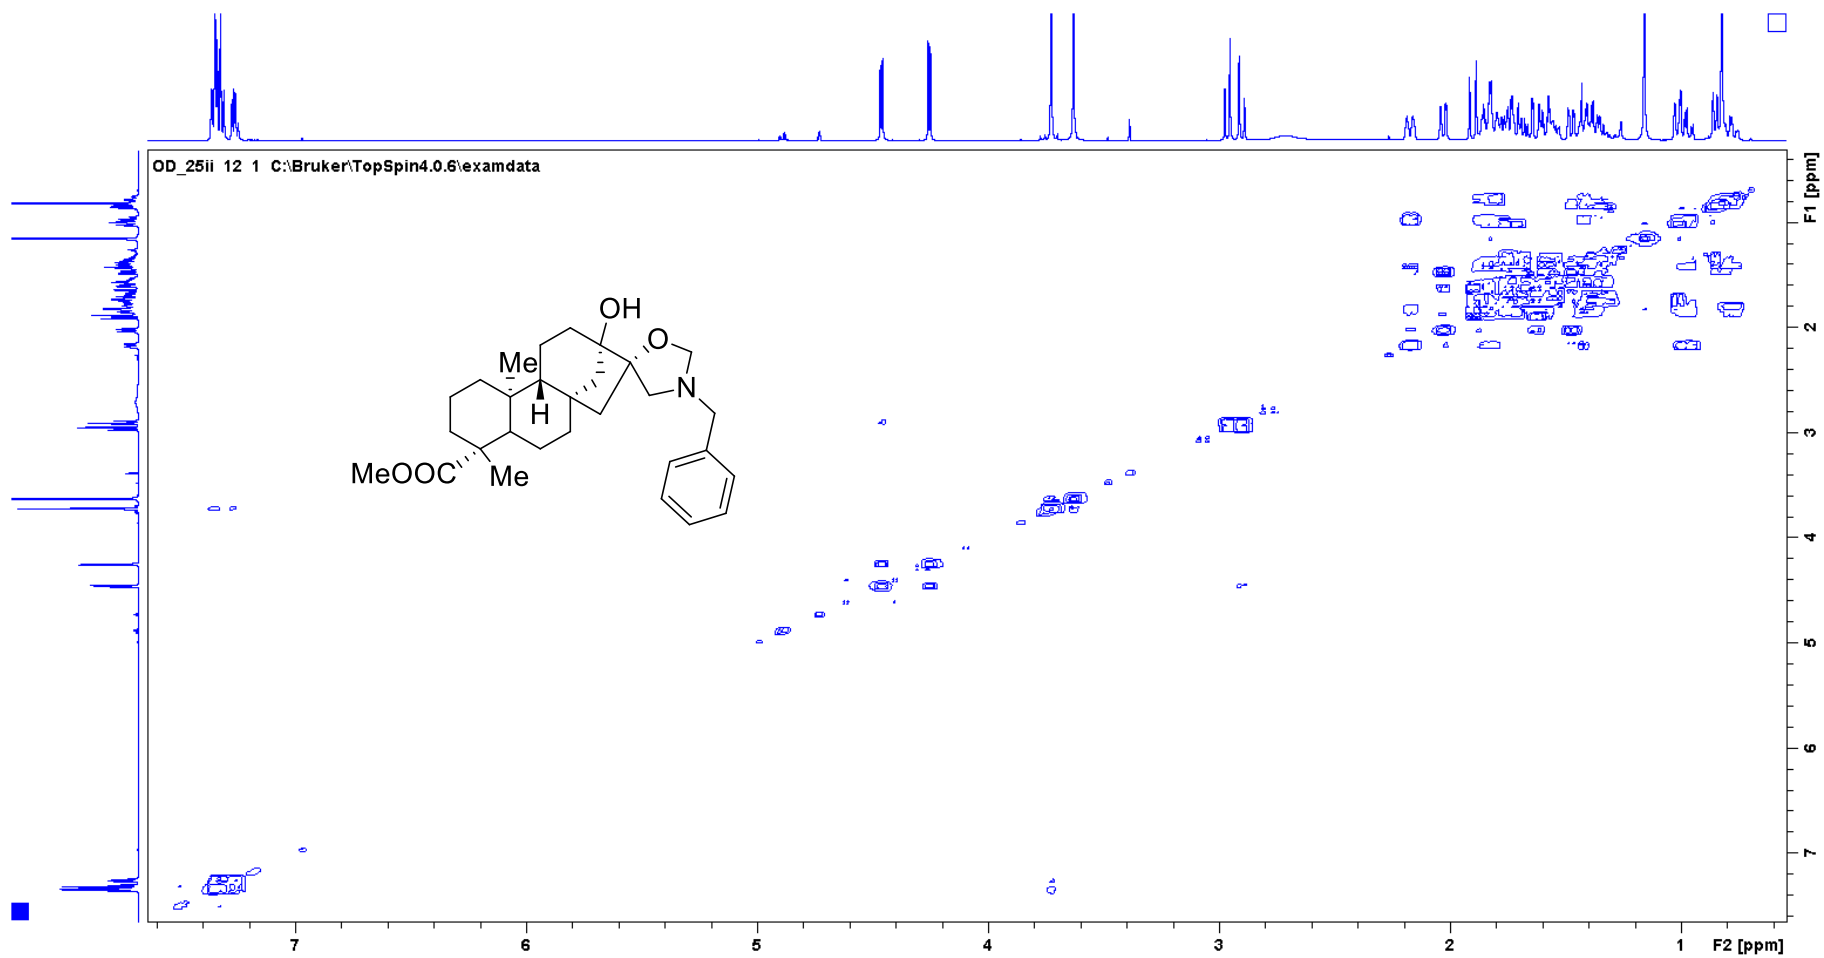

# NOESY of compound 19

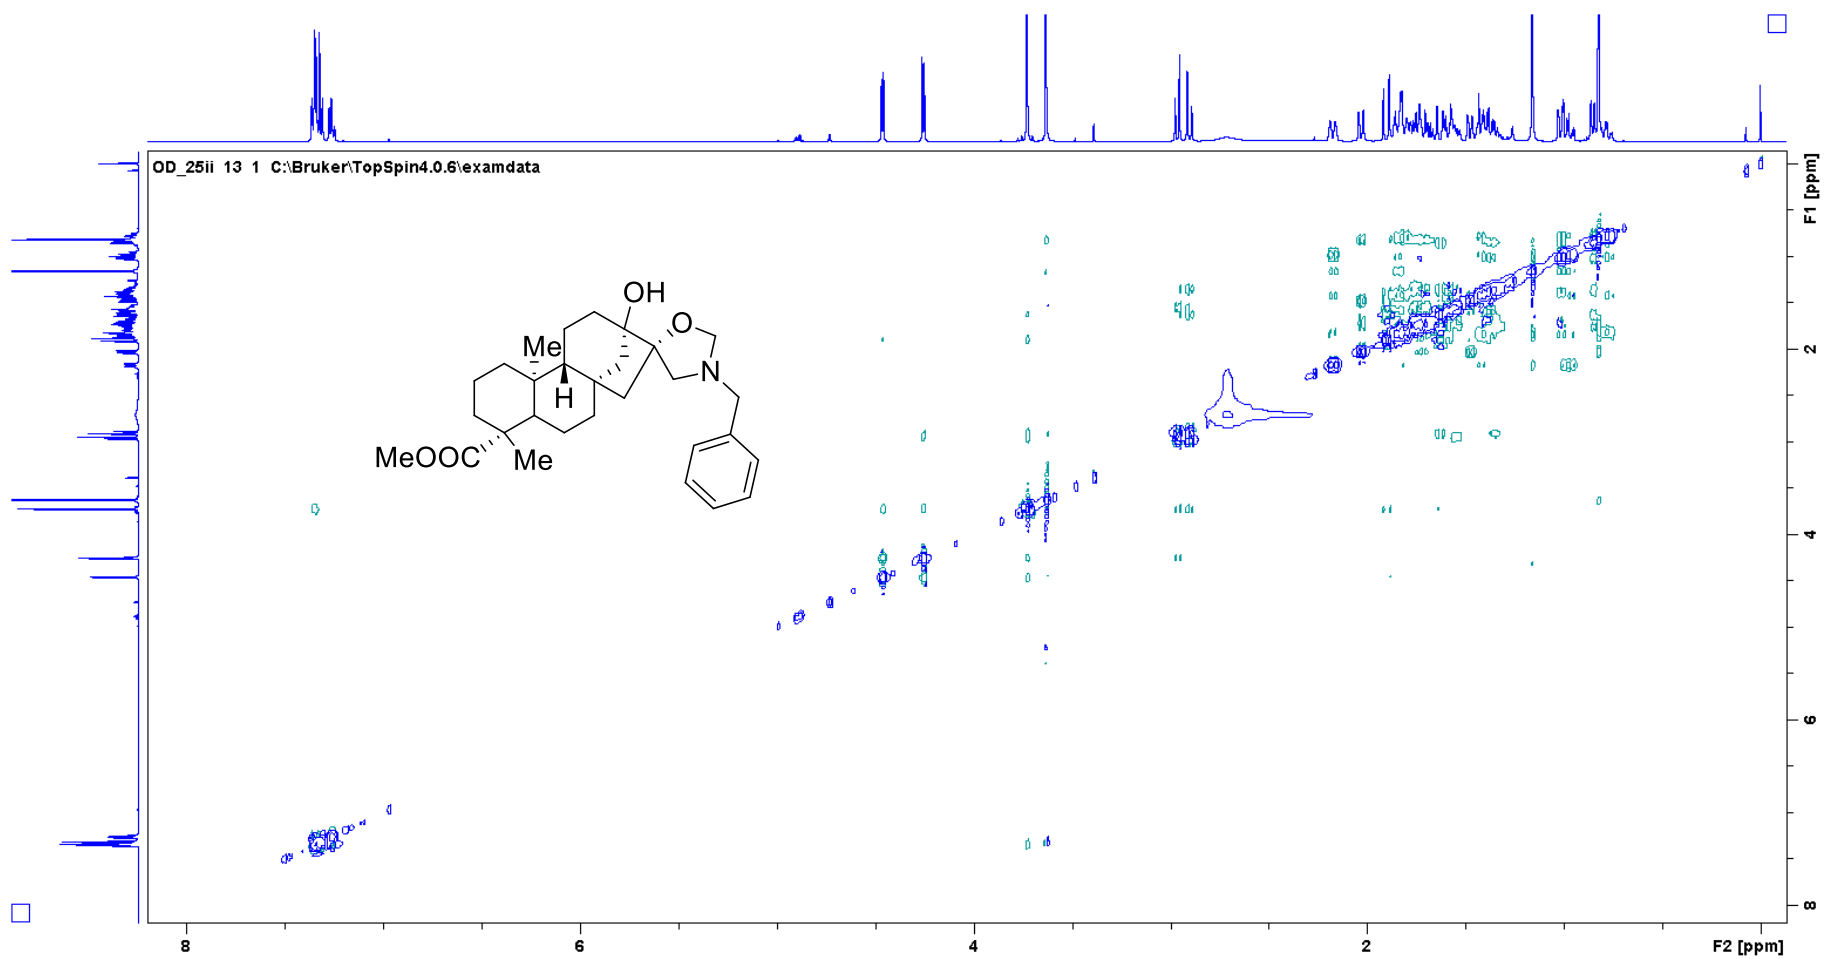

# HSQC of compound 19

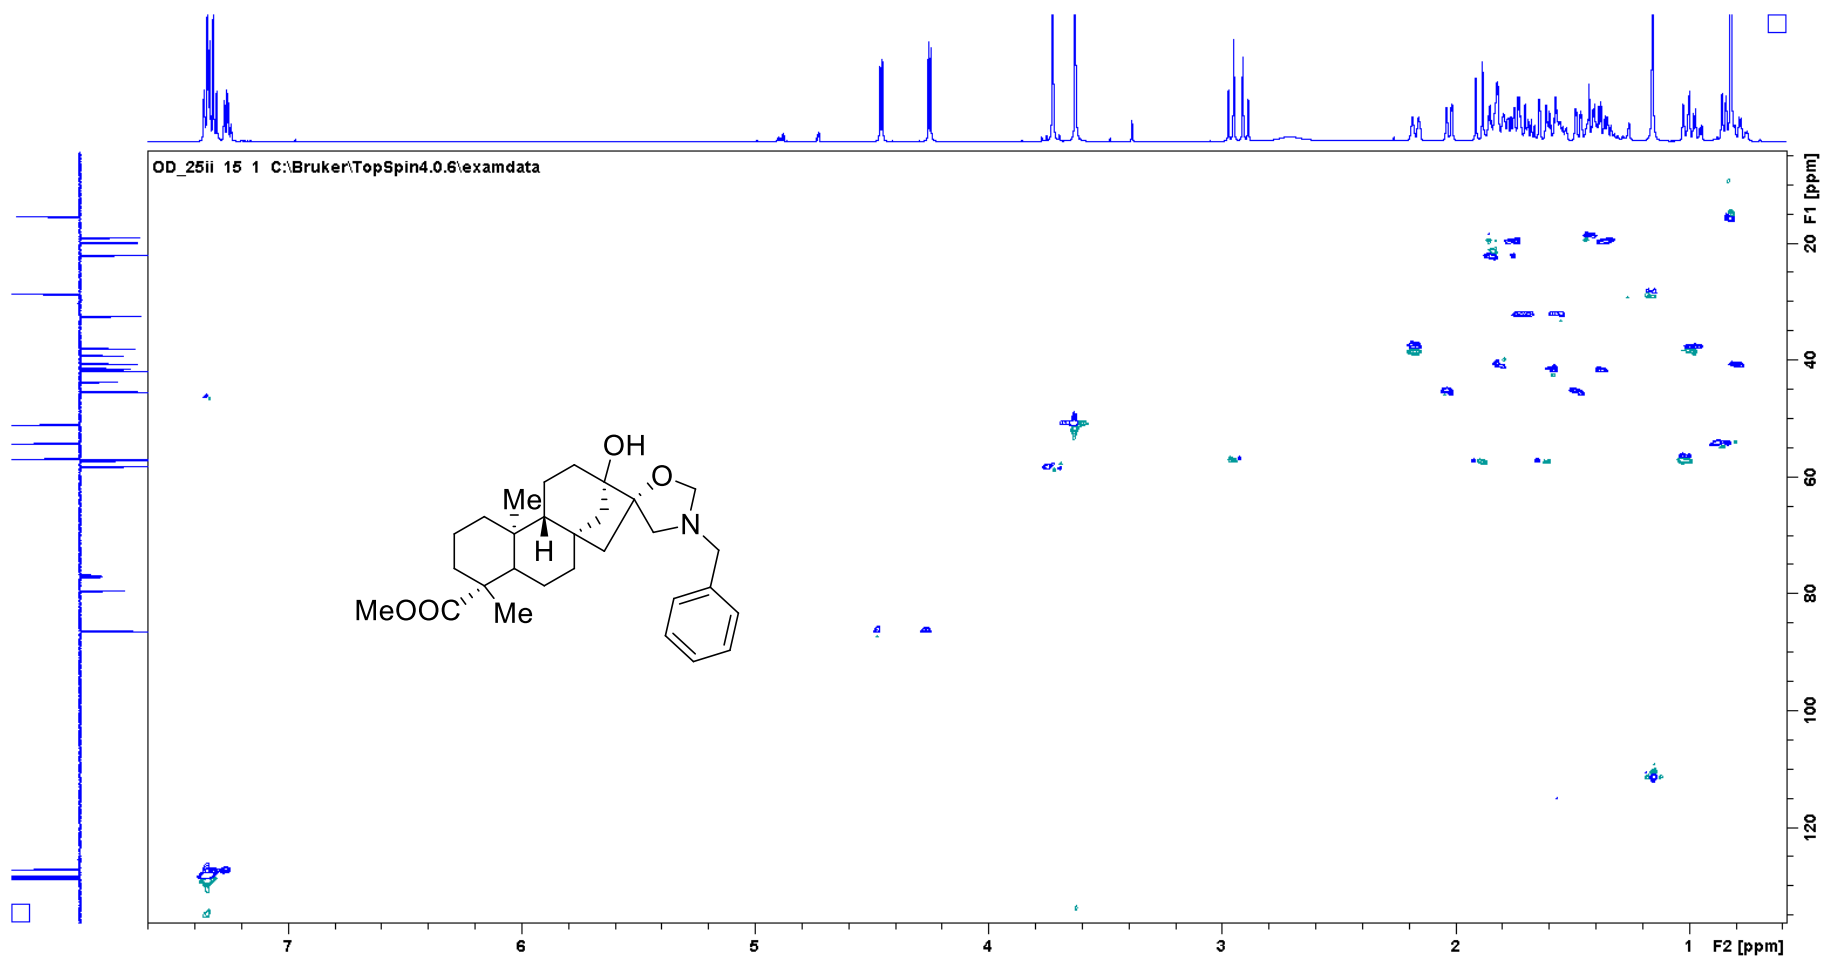

# HMBC of compound 19

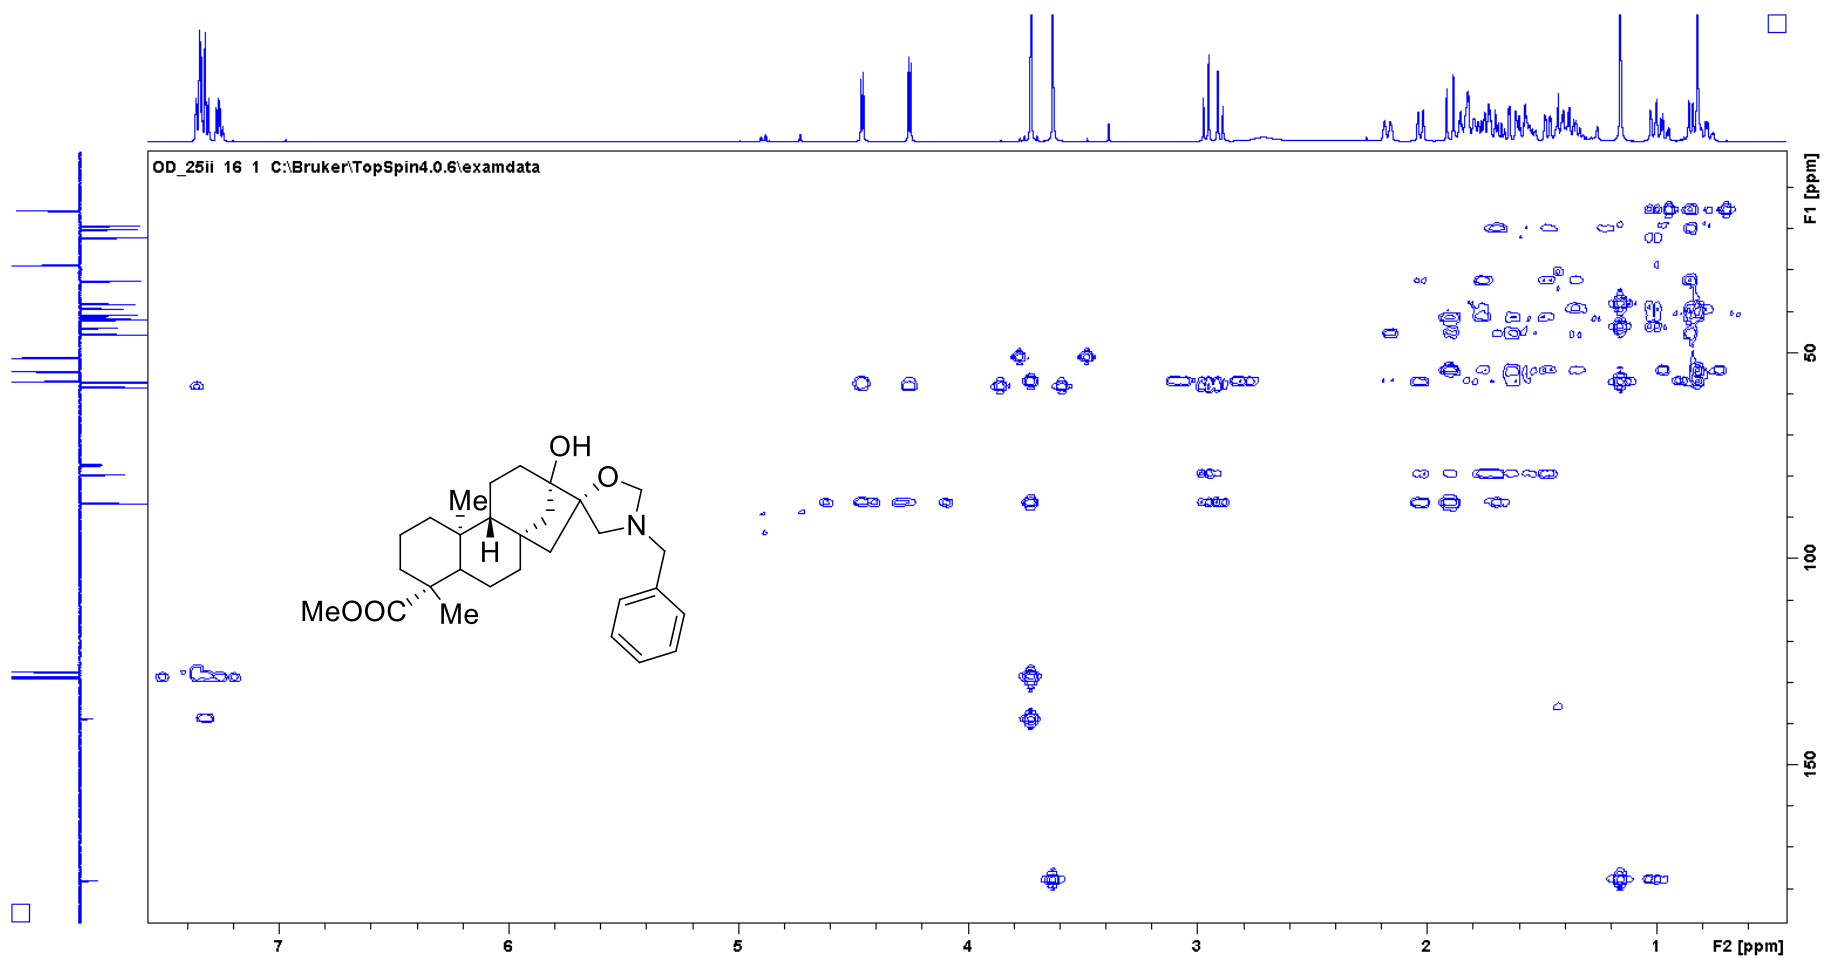

# <sup>1</sup>H-NMR of compound 20

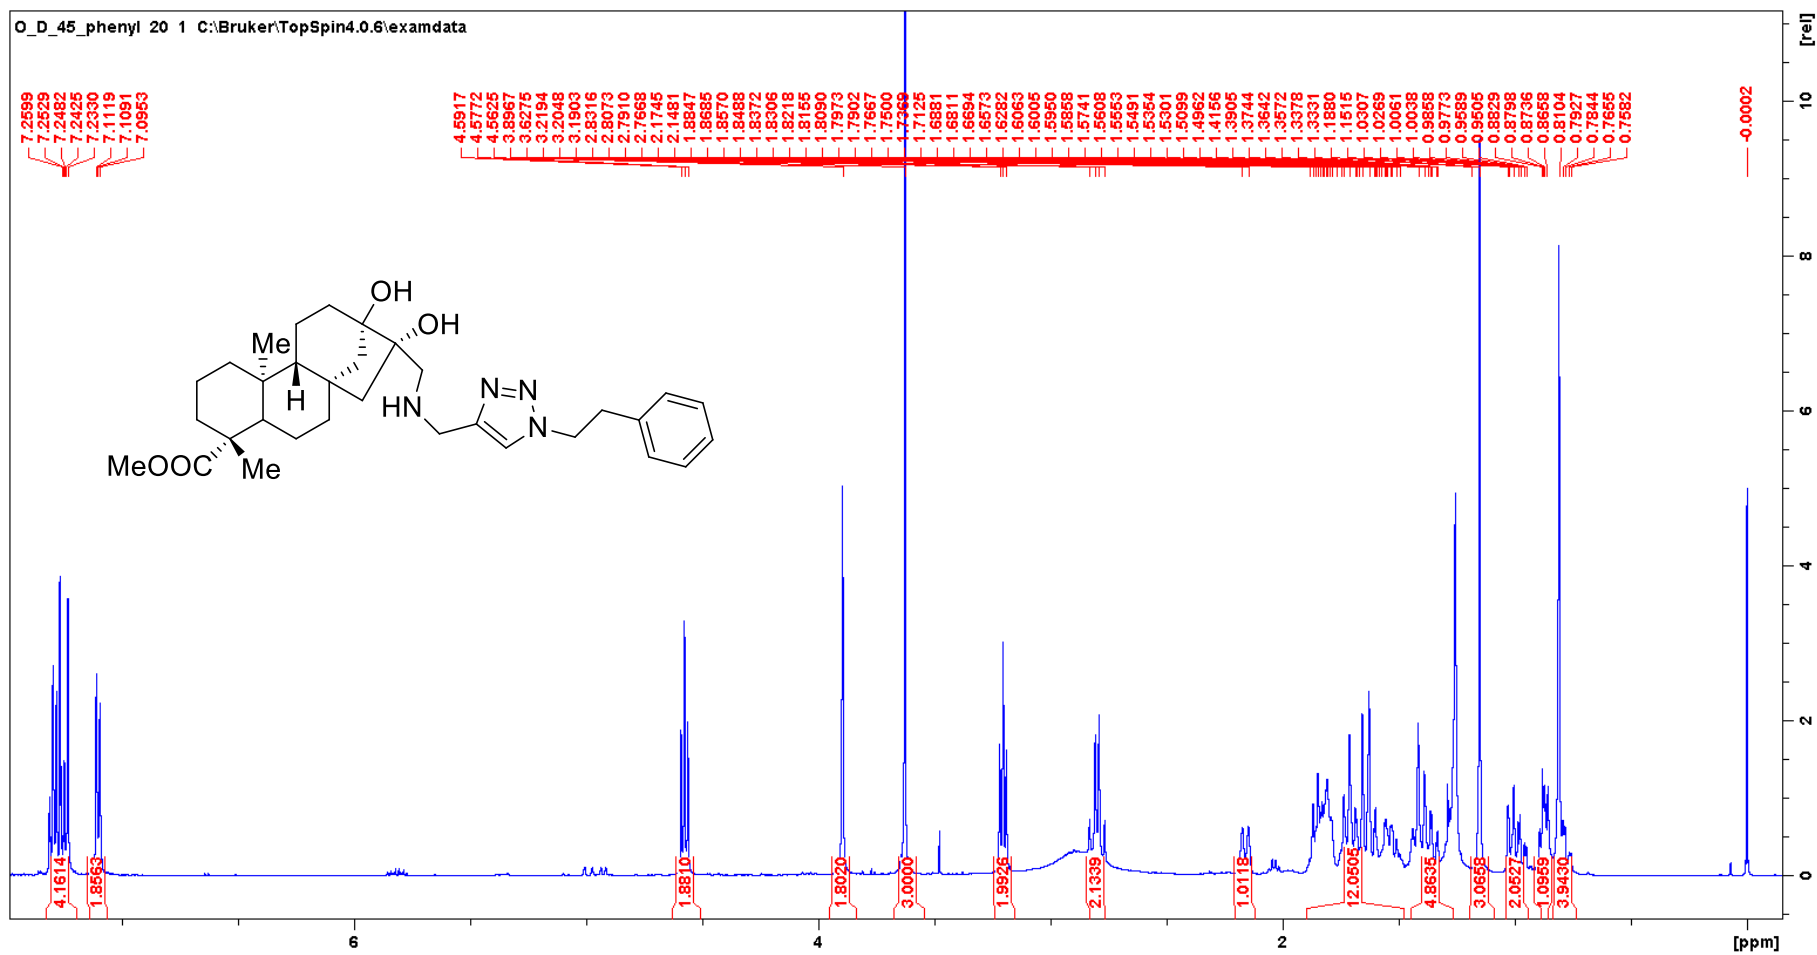

<sup>13</sup>C-NMR of compound 20

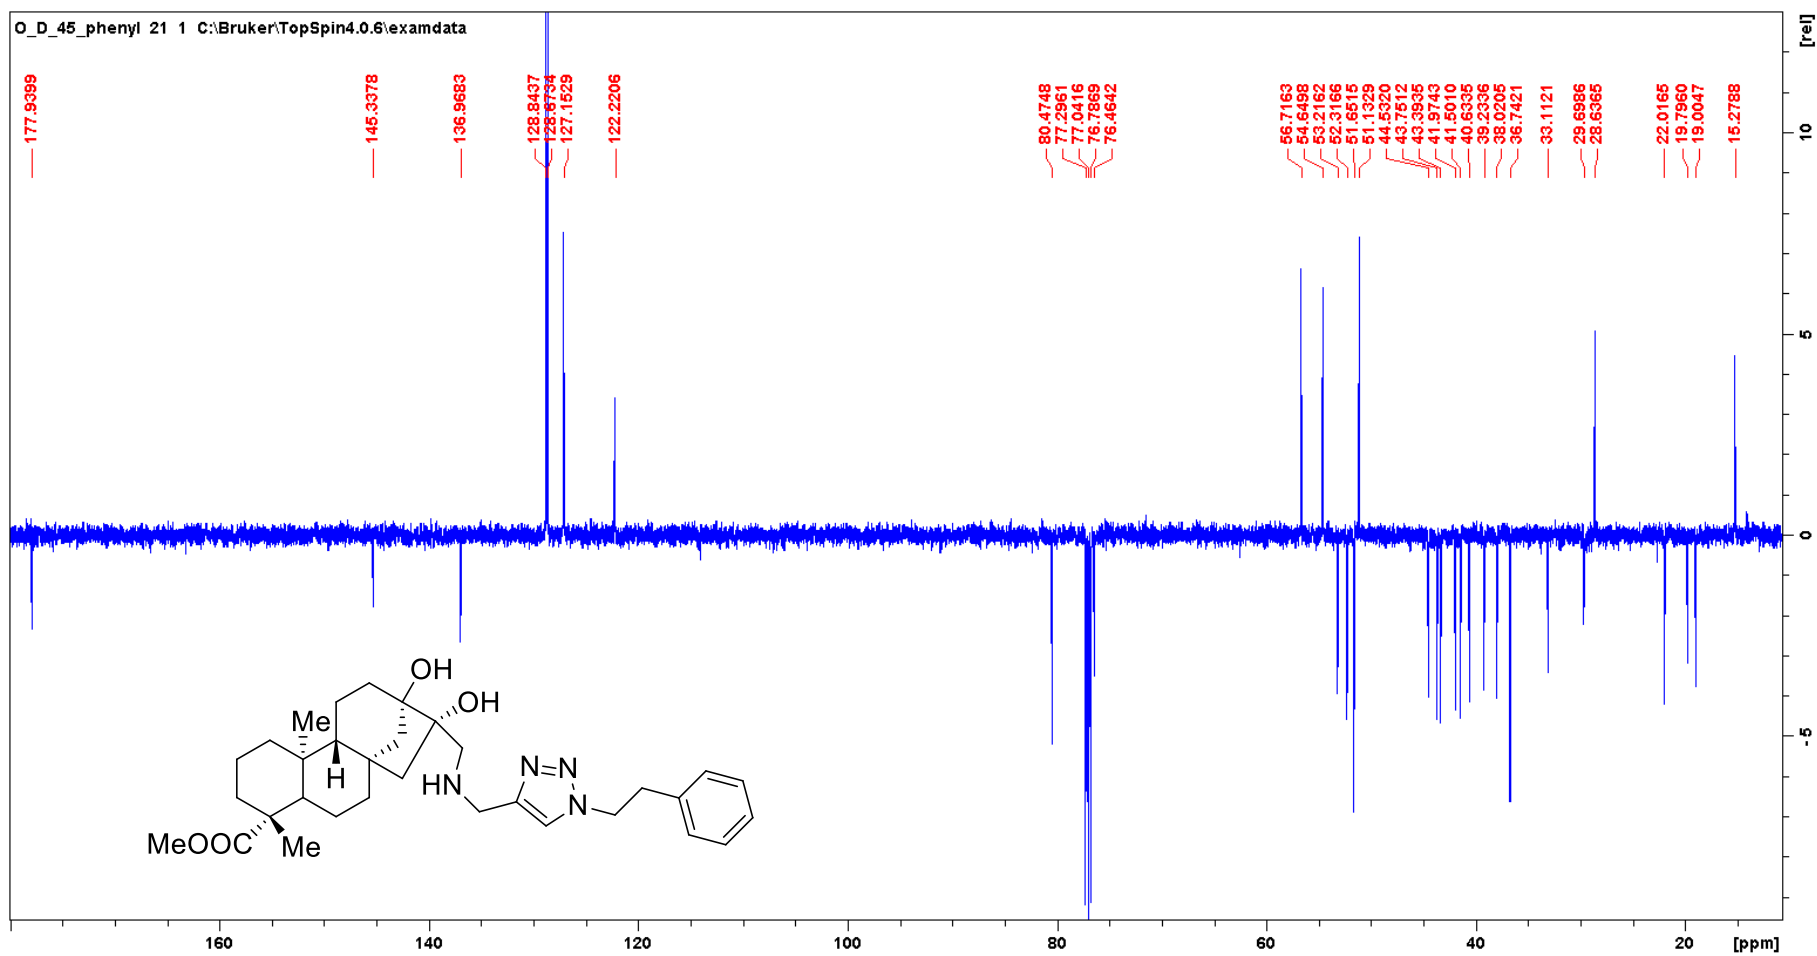



COSY of compound 20

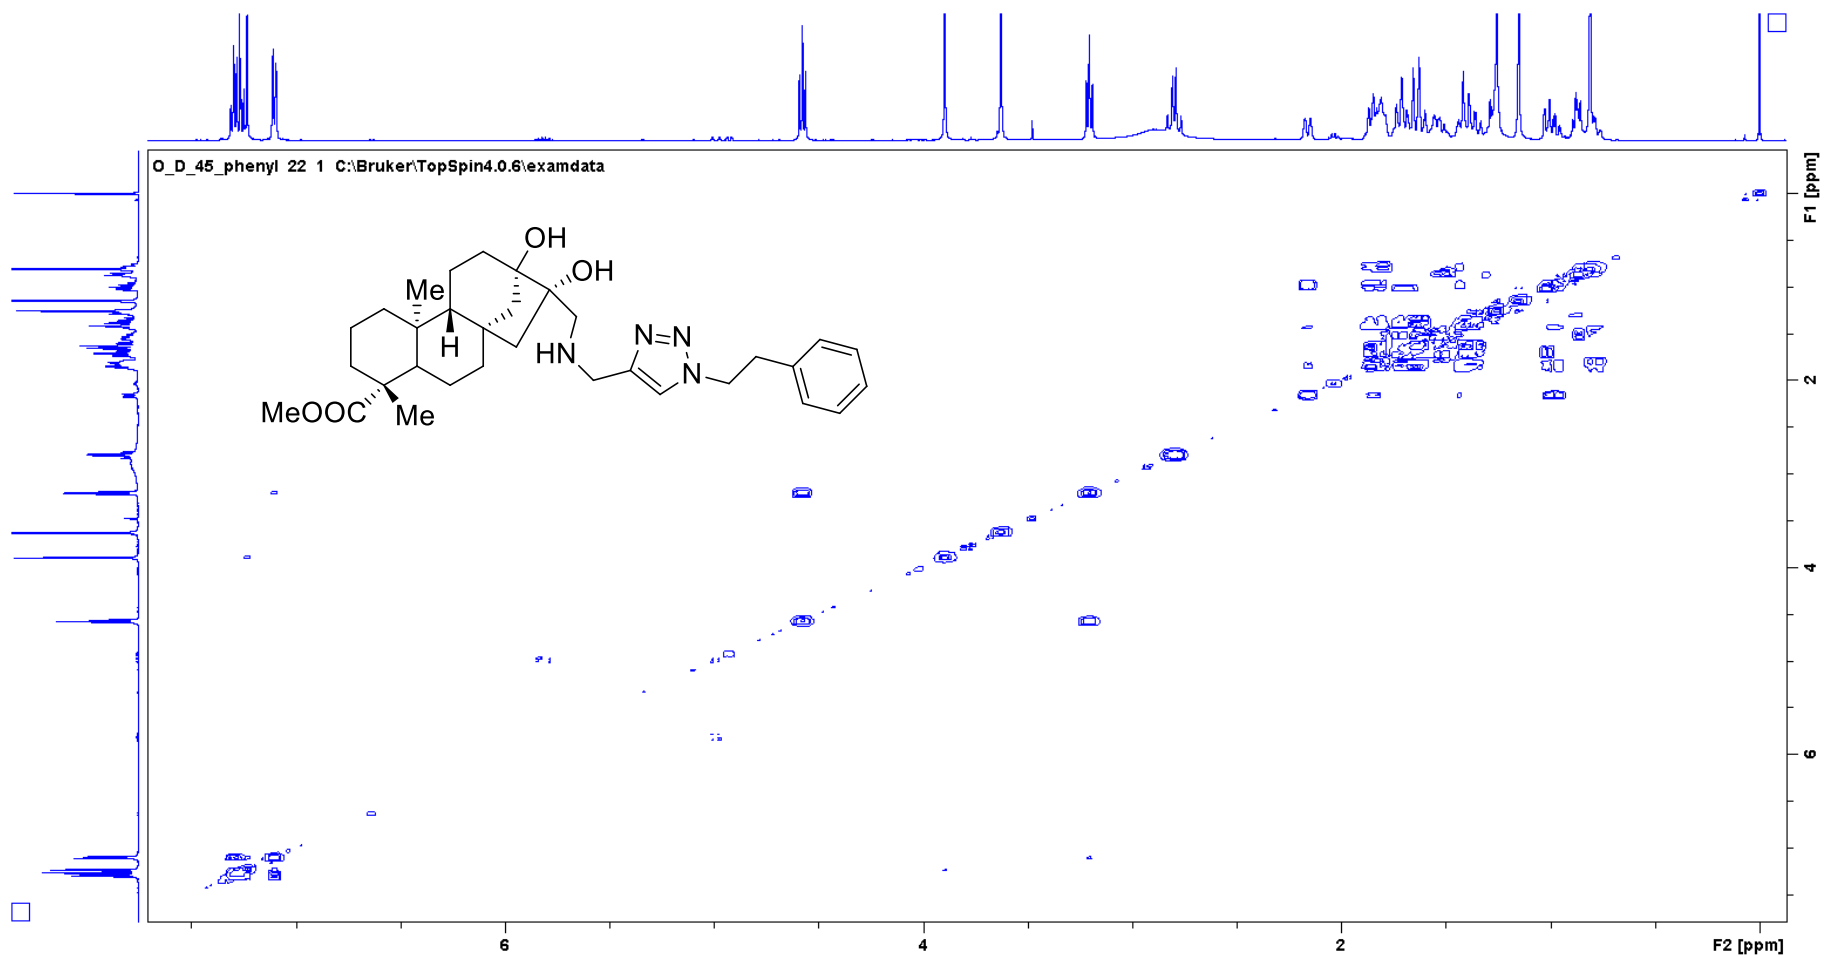

# HSQC of compound 20

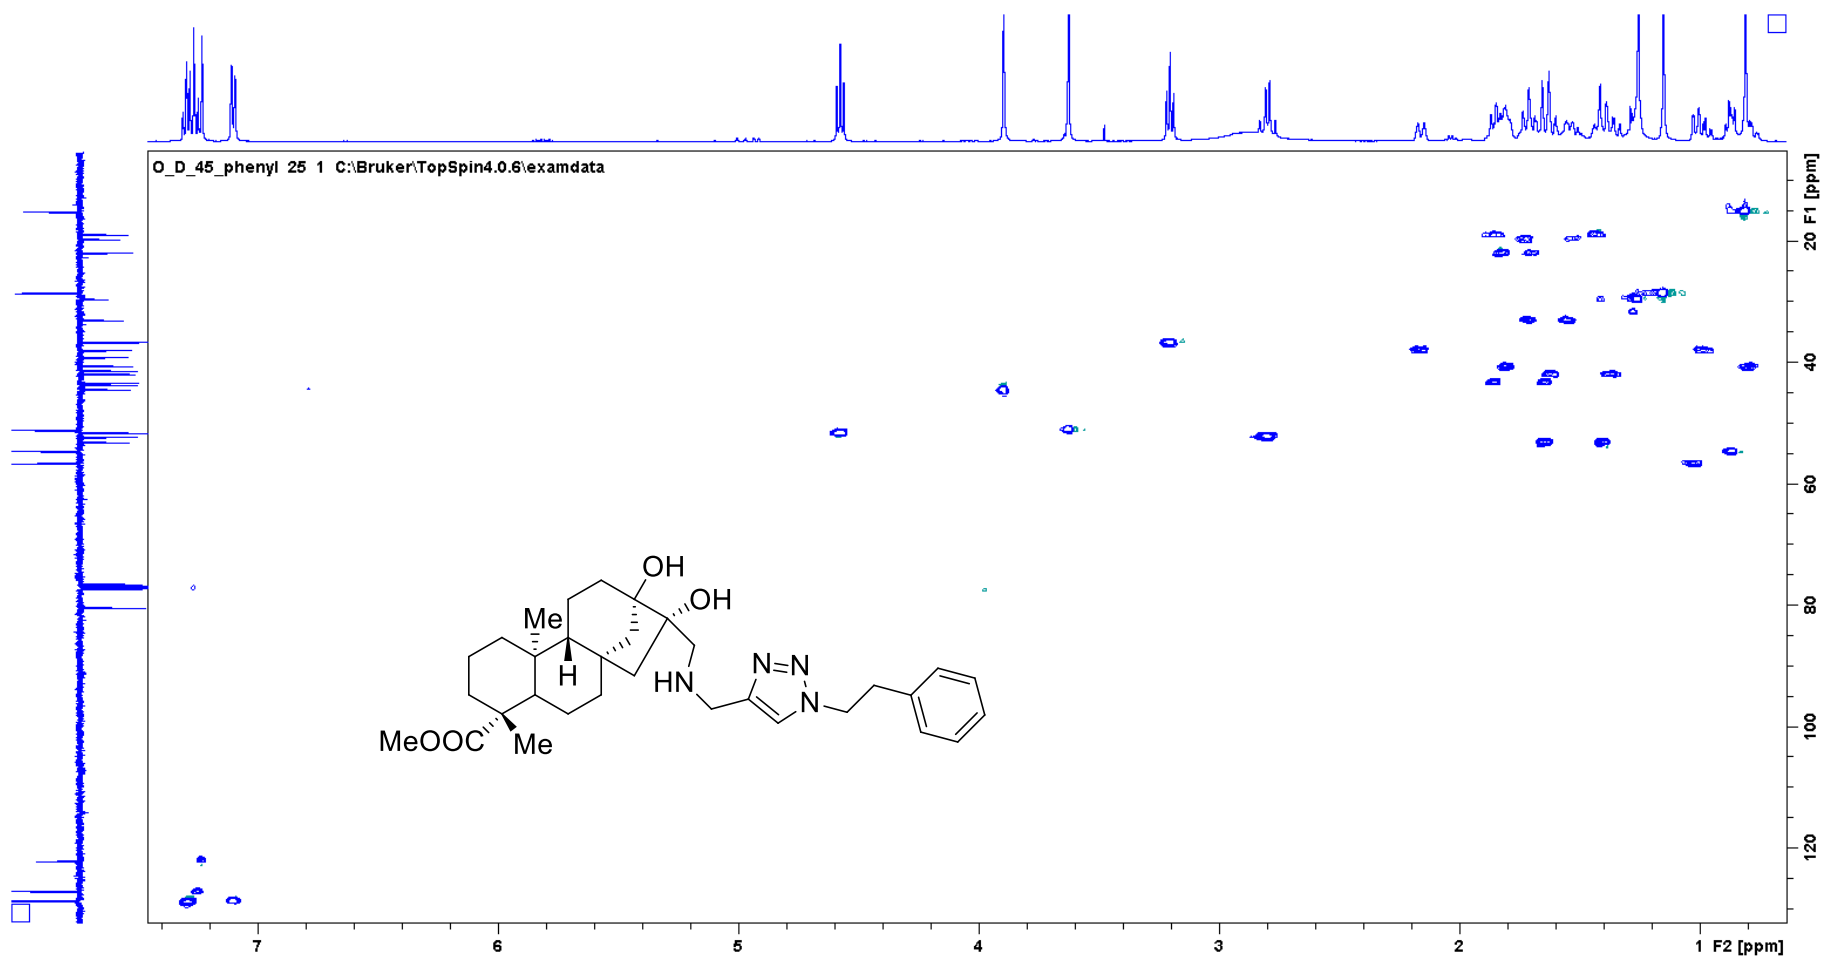

# HMBC of compound 20

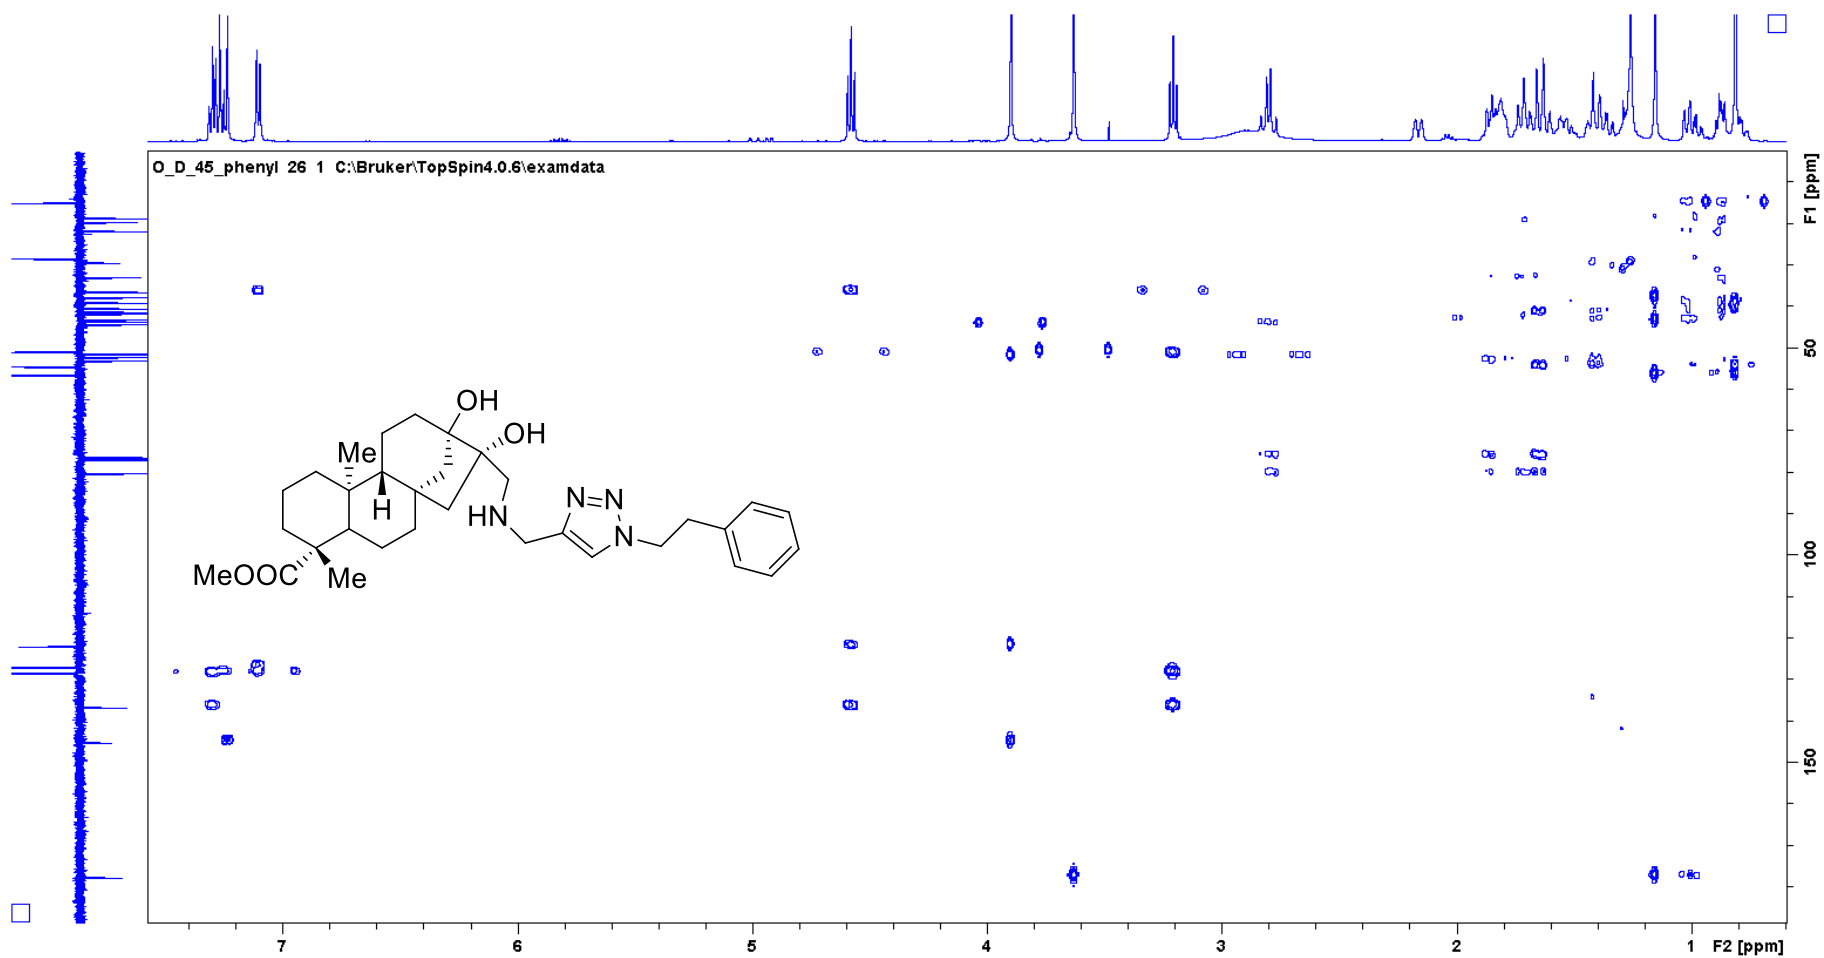

<sup>1</sup>H-NMR of compound 21

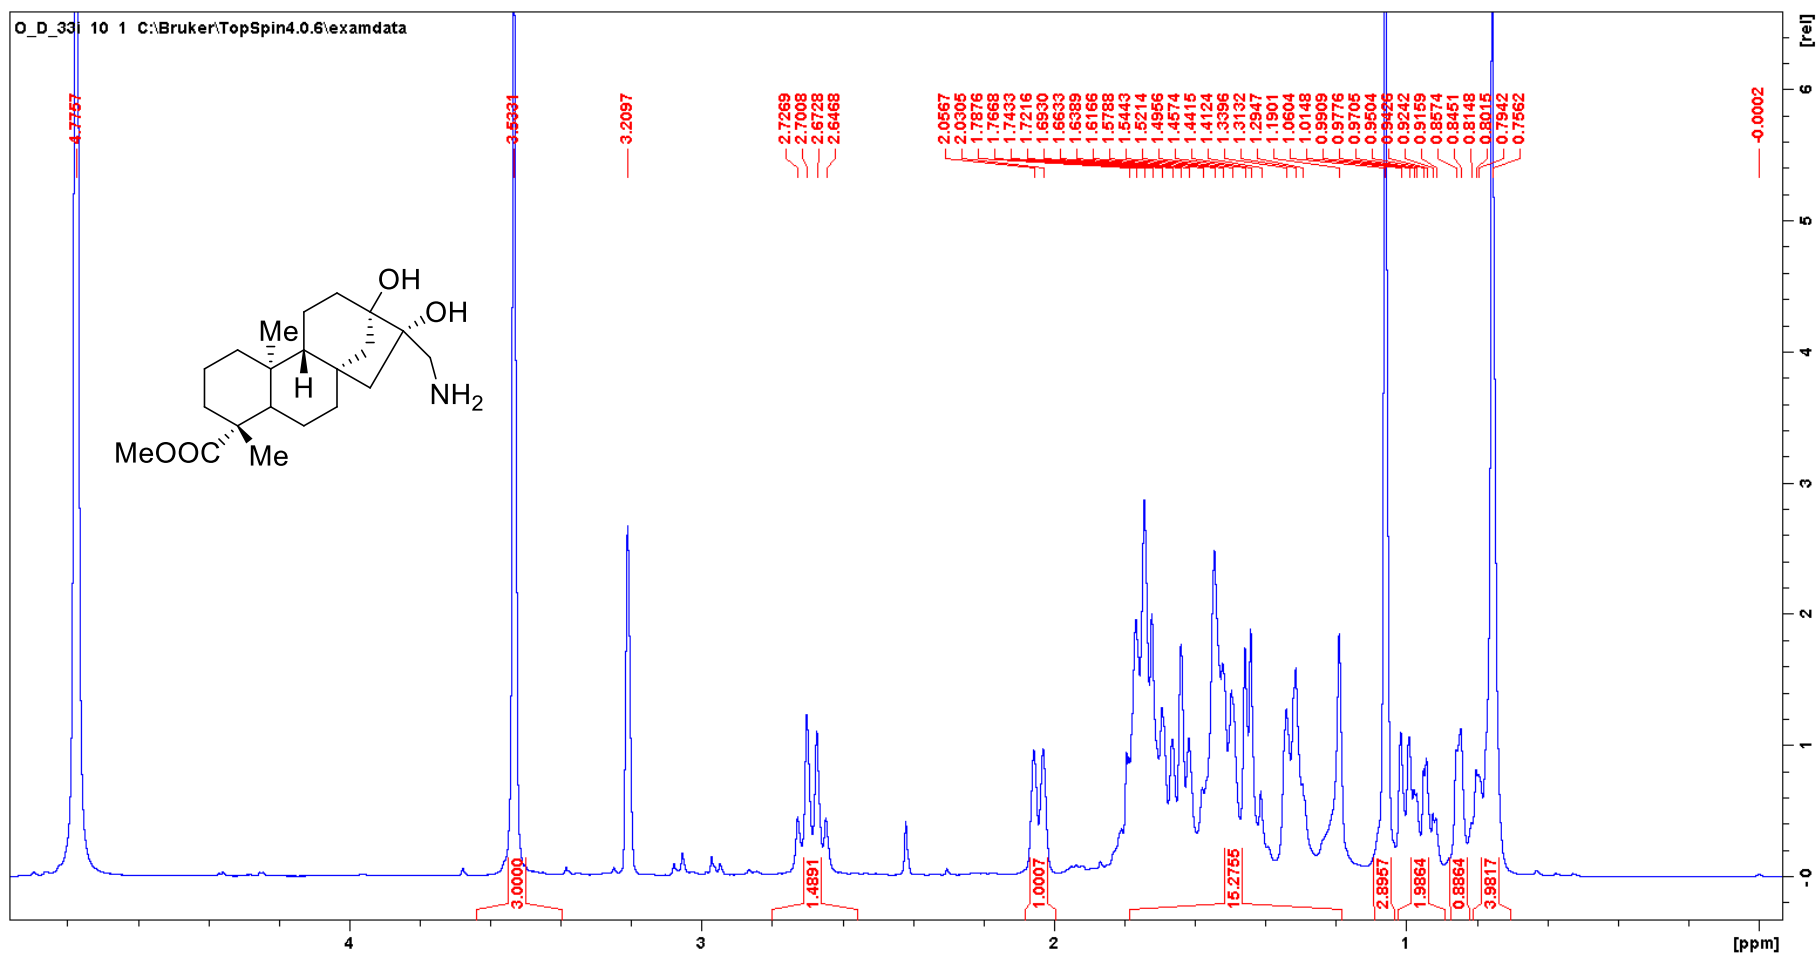

<sup>13</sup>C-NMR of compound 21

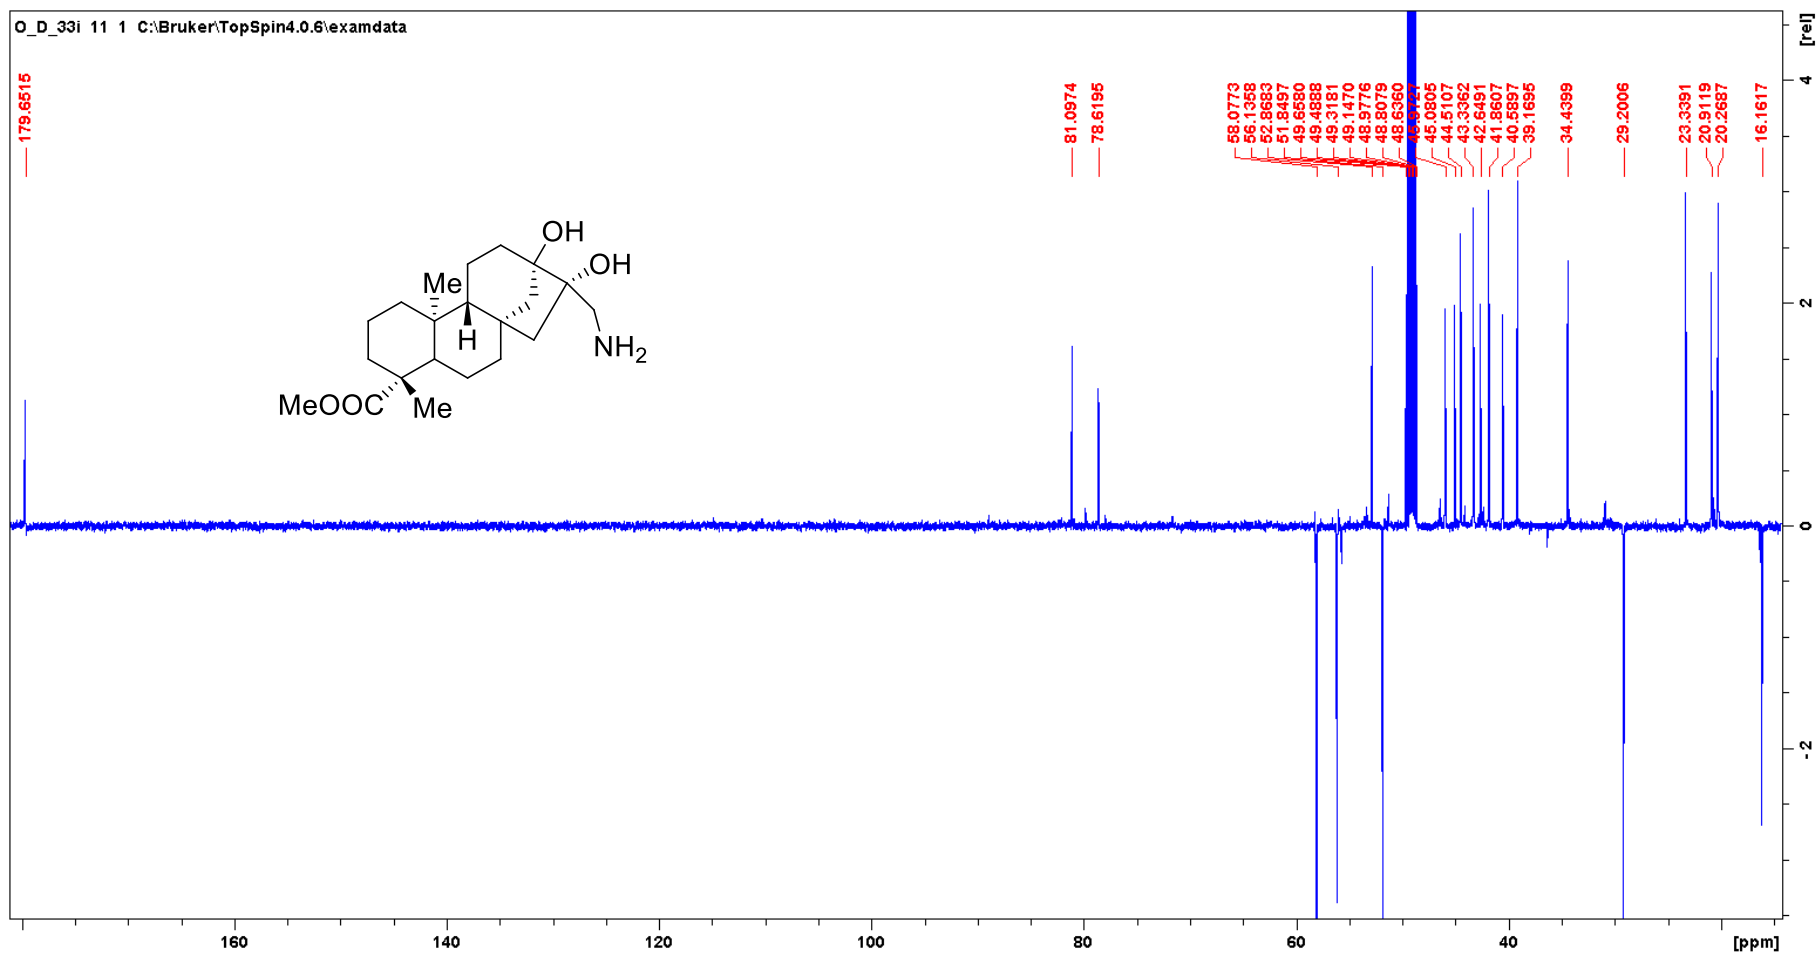

COSY of compound 21

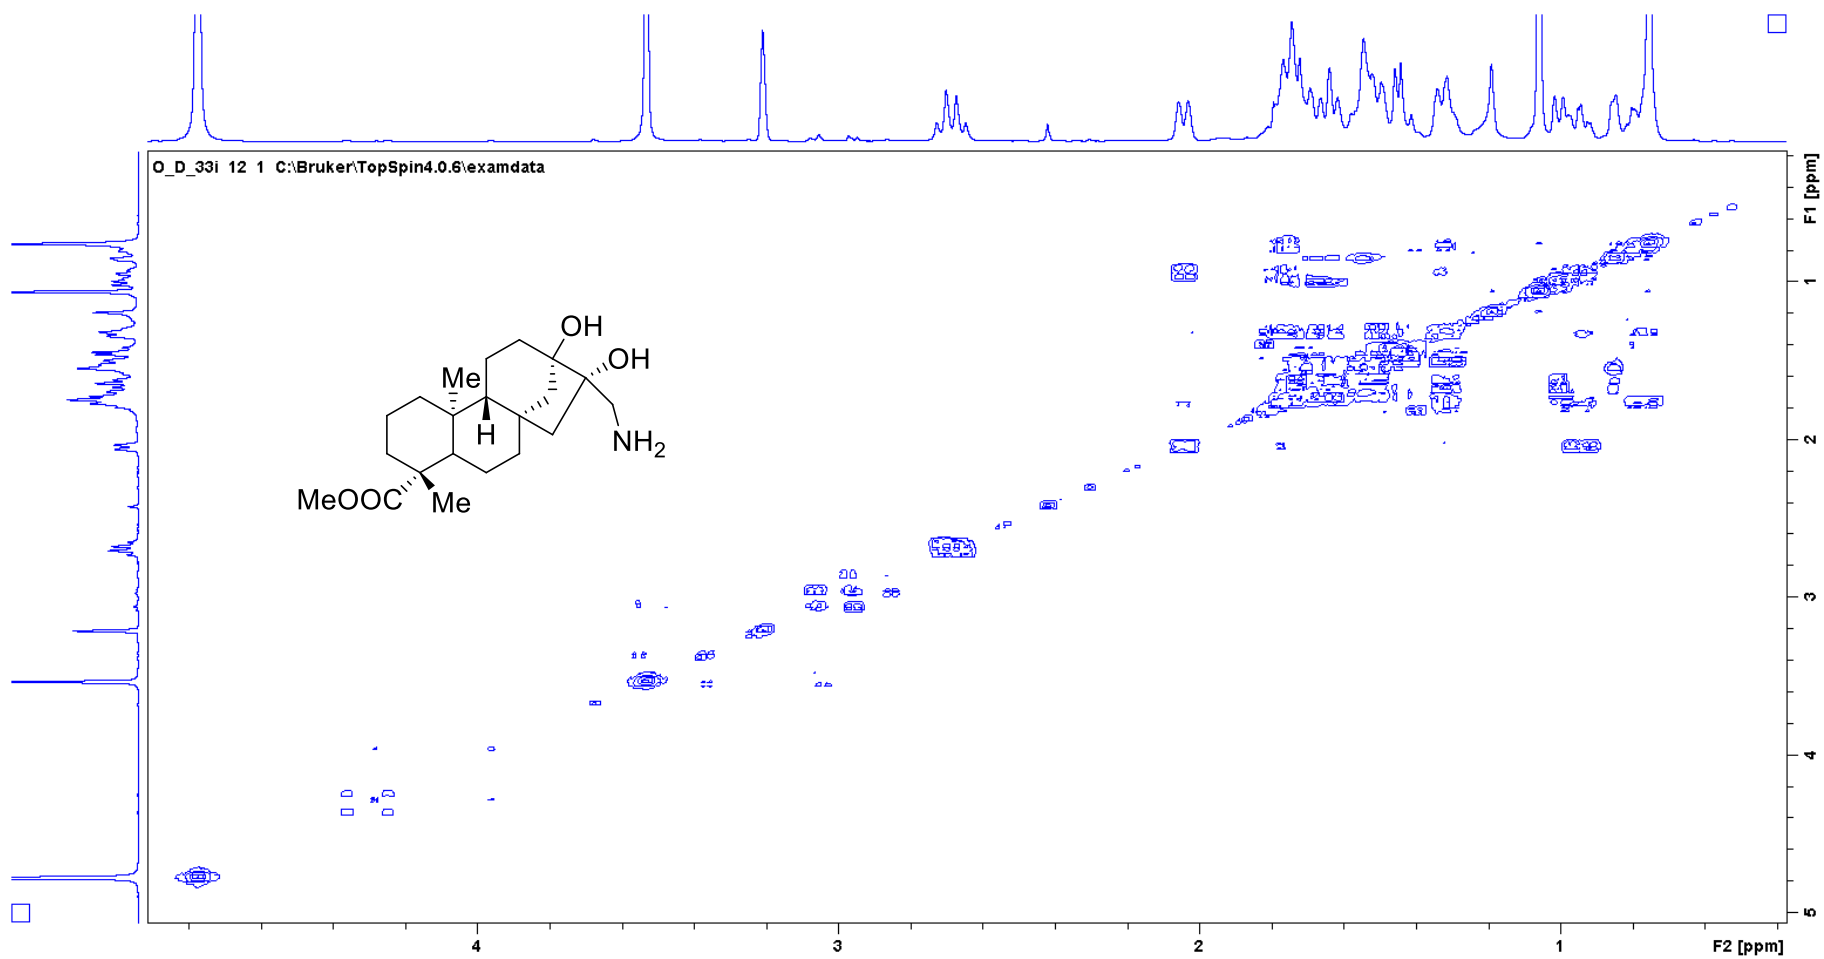

# NOESY of compound 21

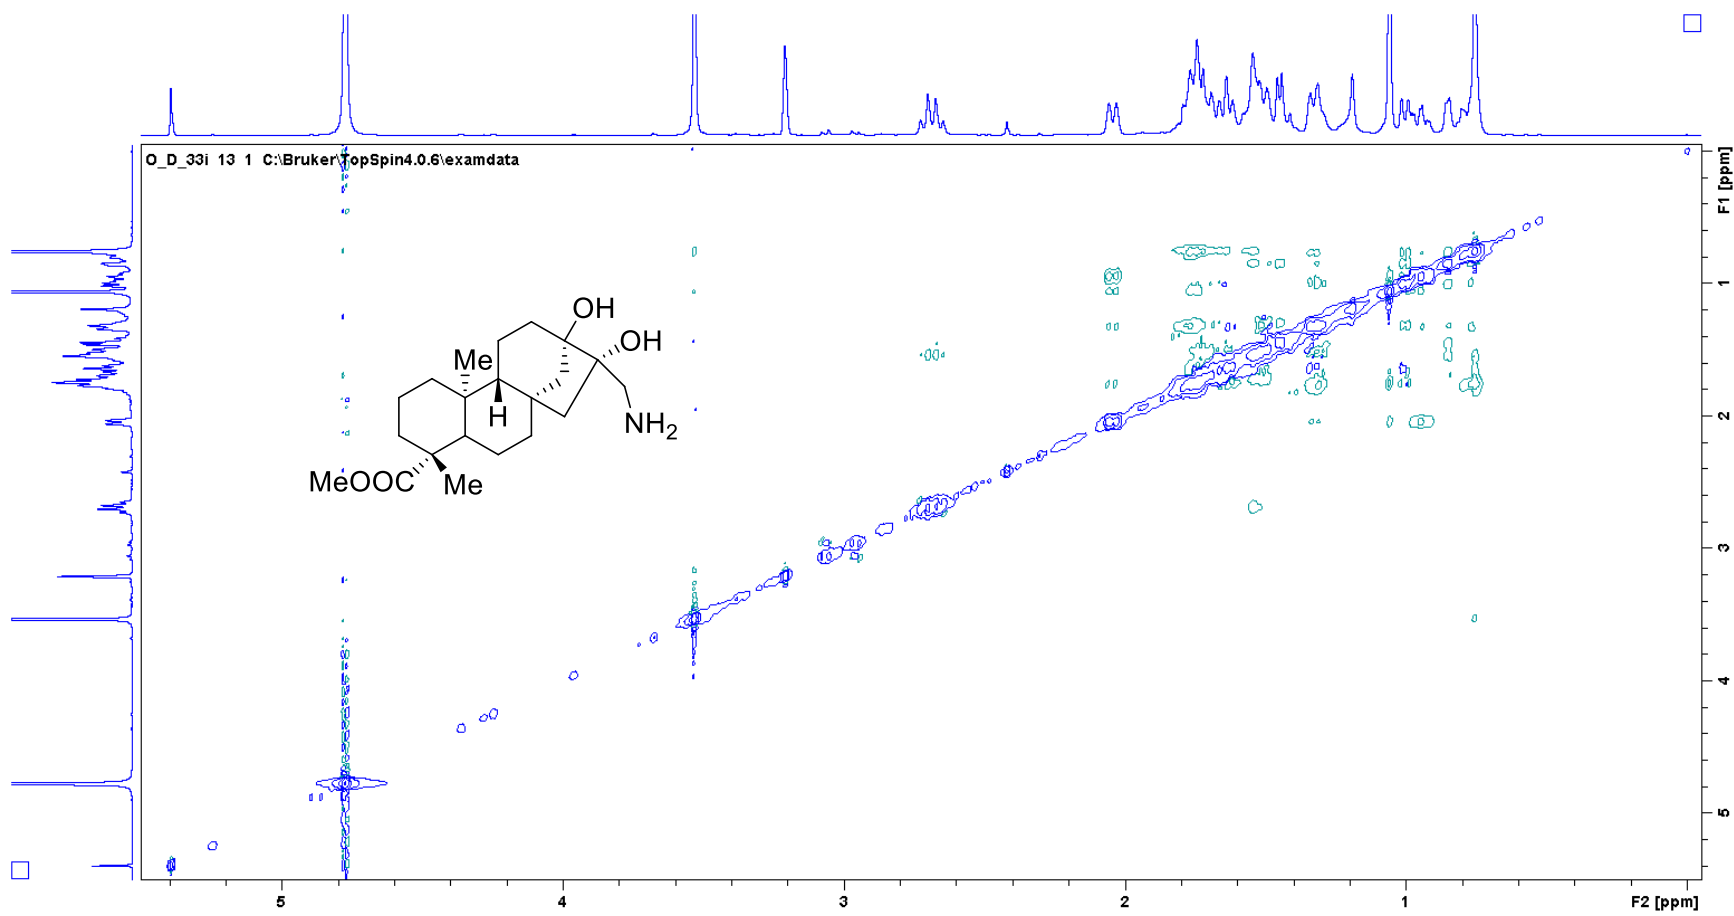

# HSQC of compound 21

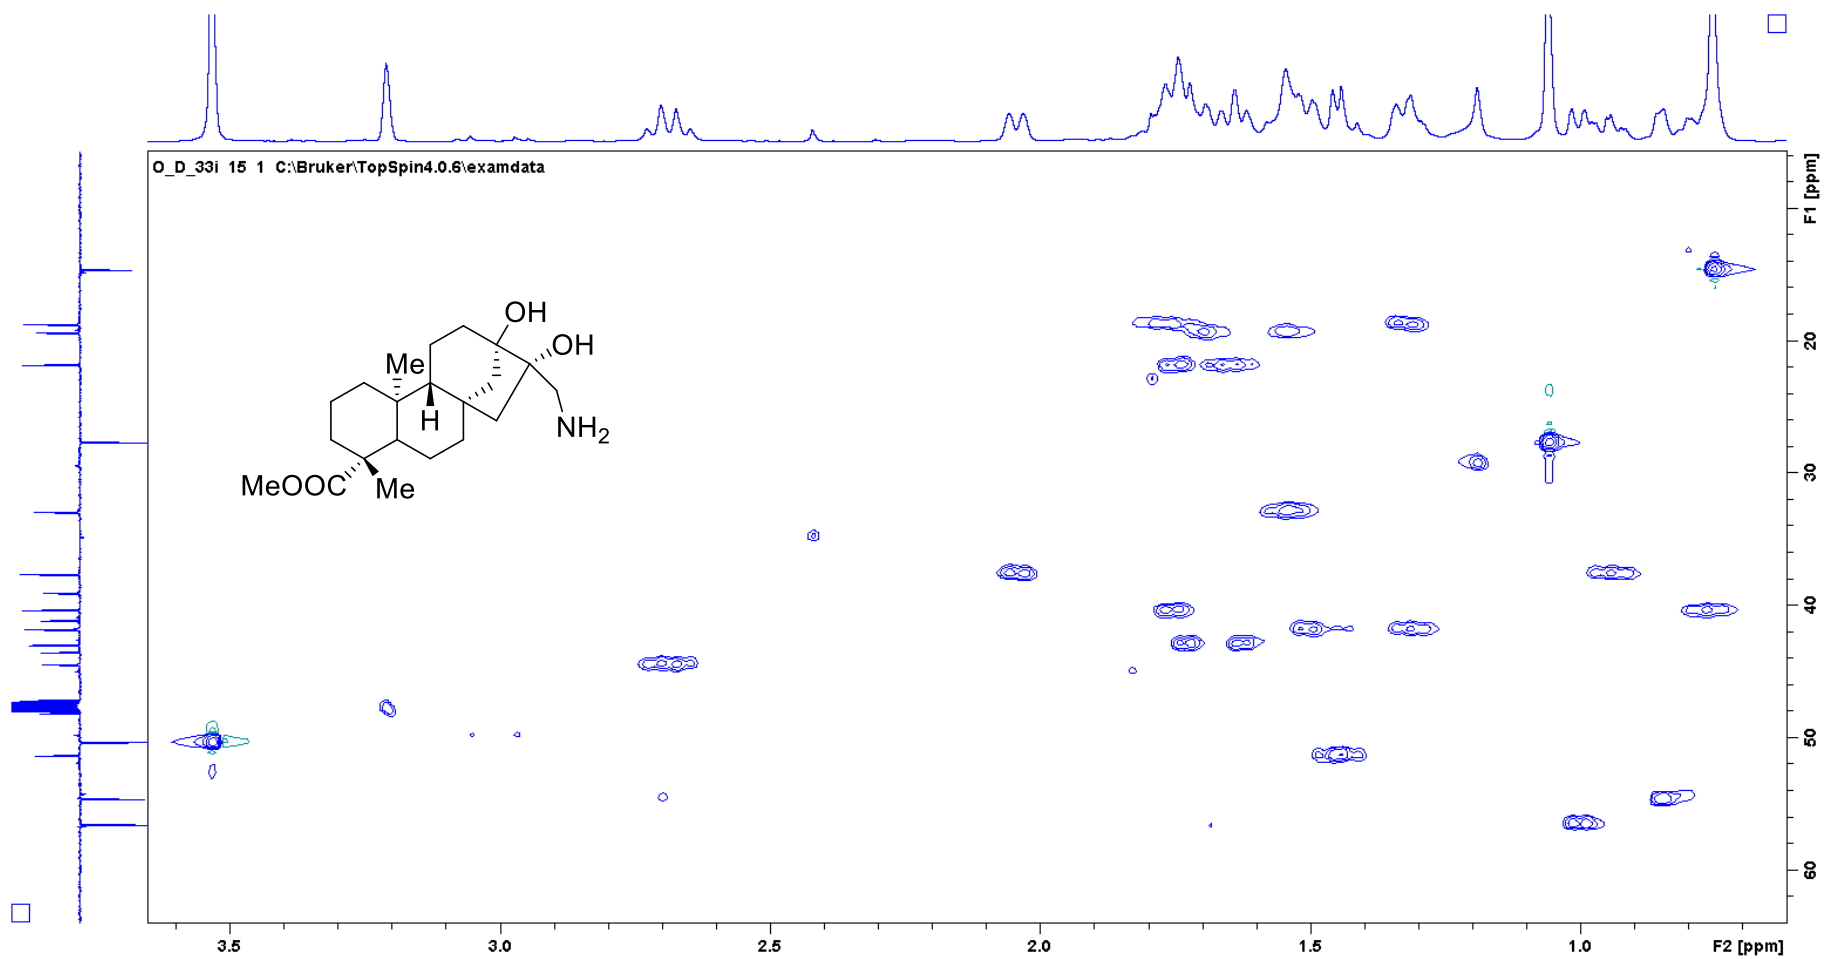



# HMBC of compound 21

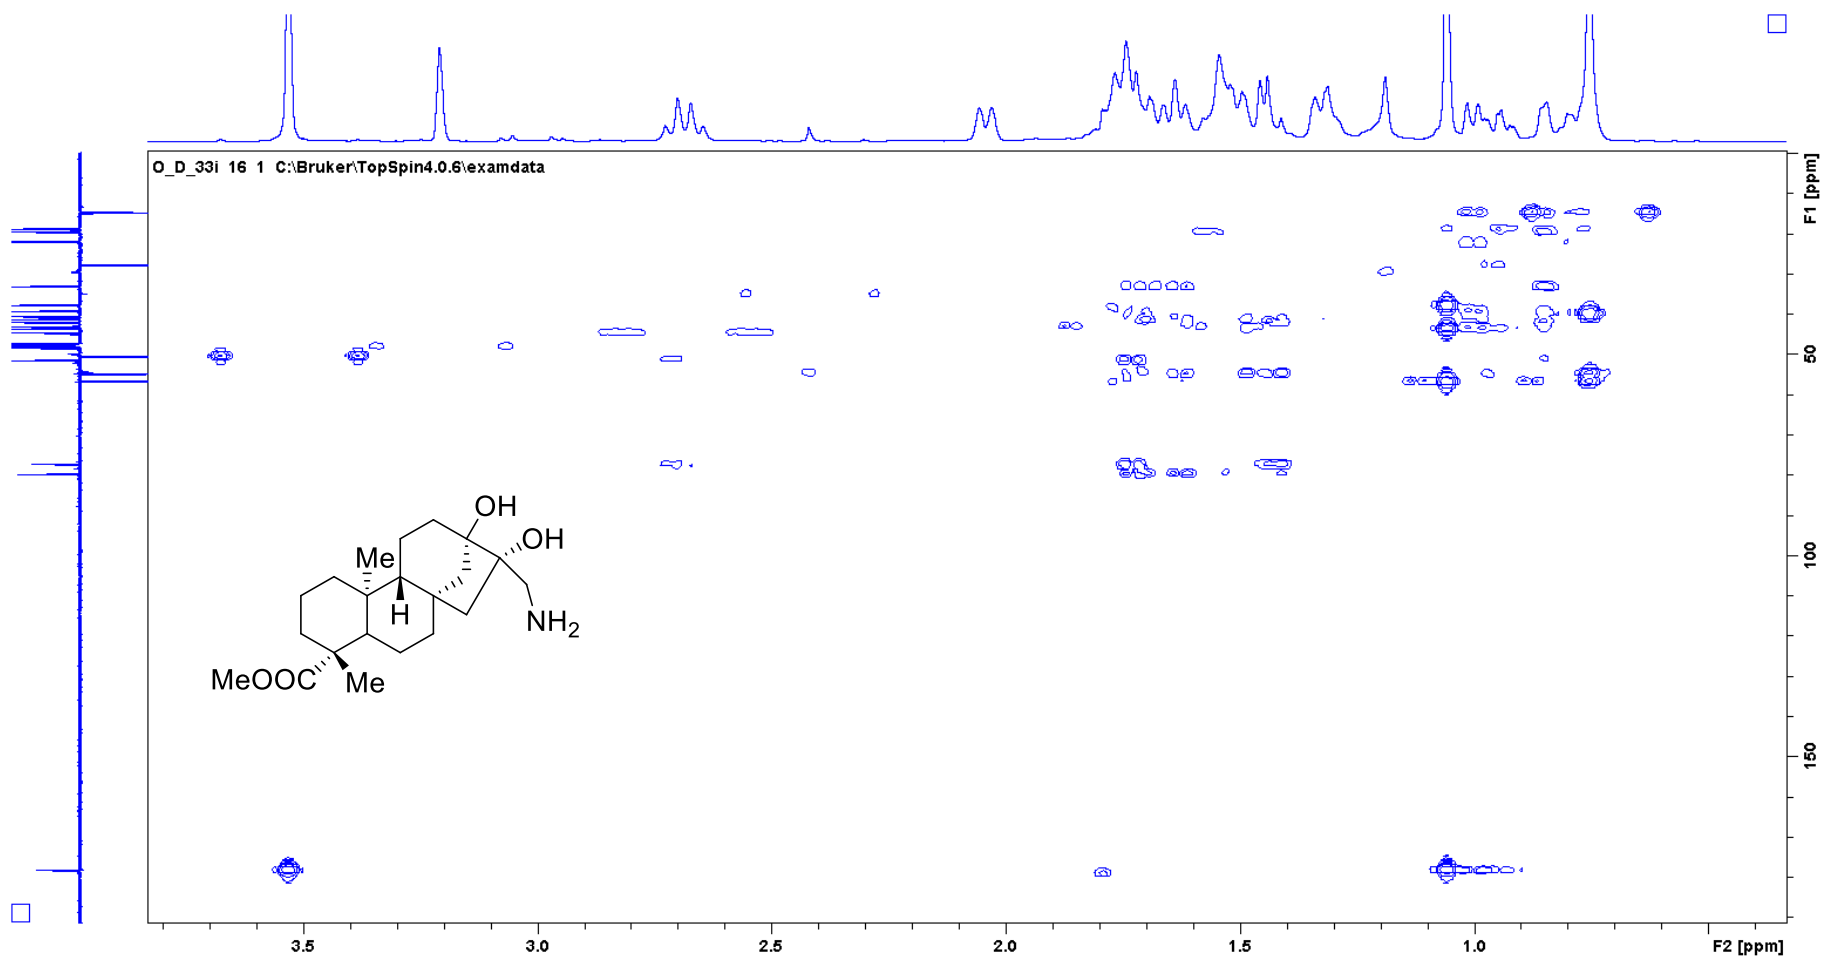

<sup>1</sup>H-NMR of compound 22

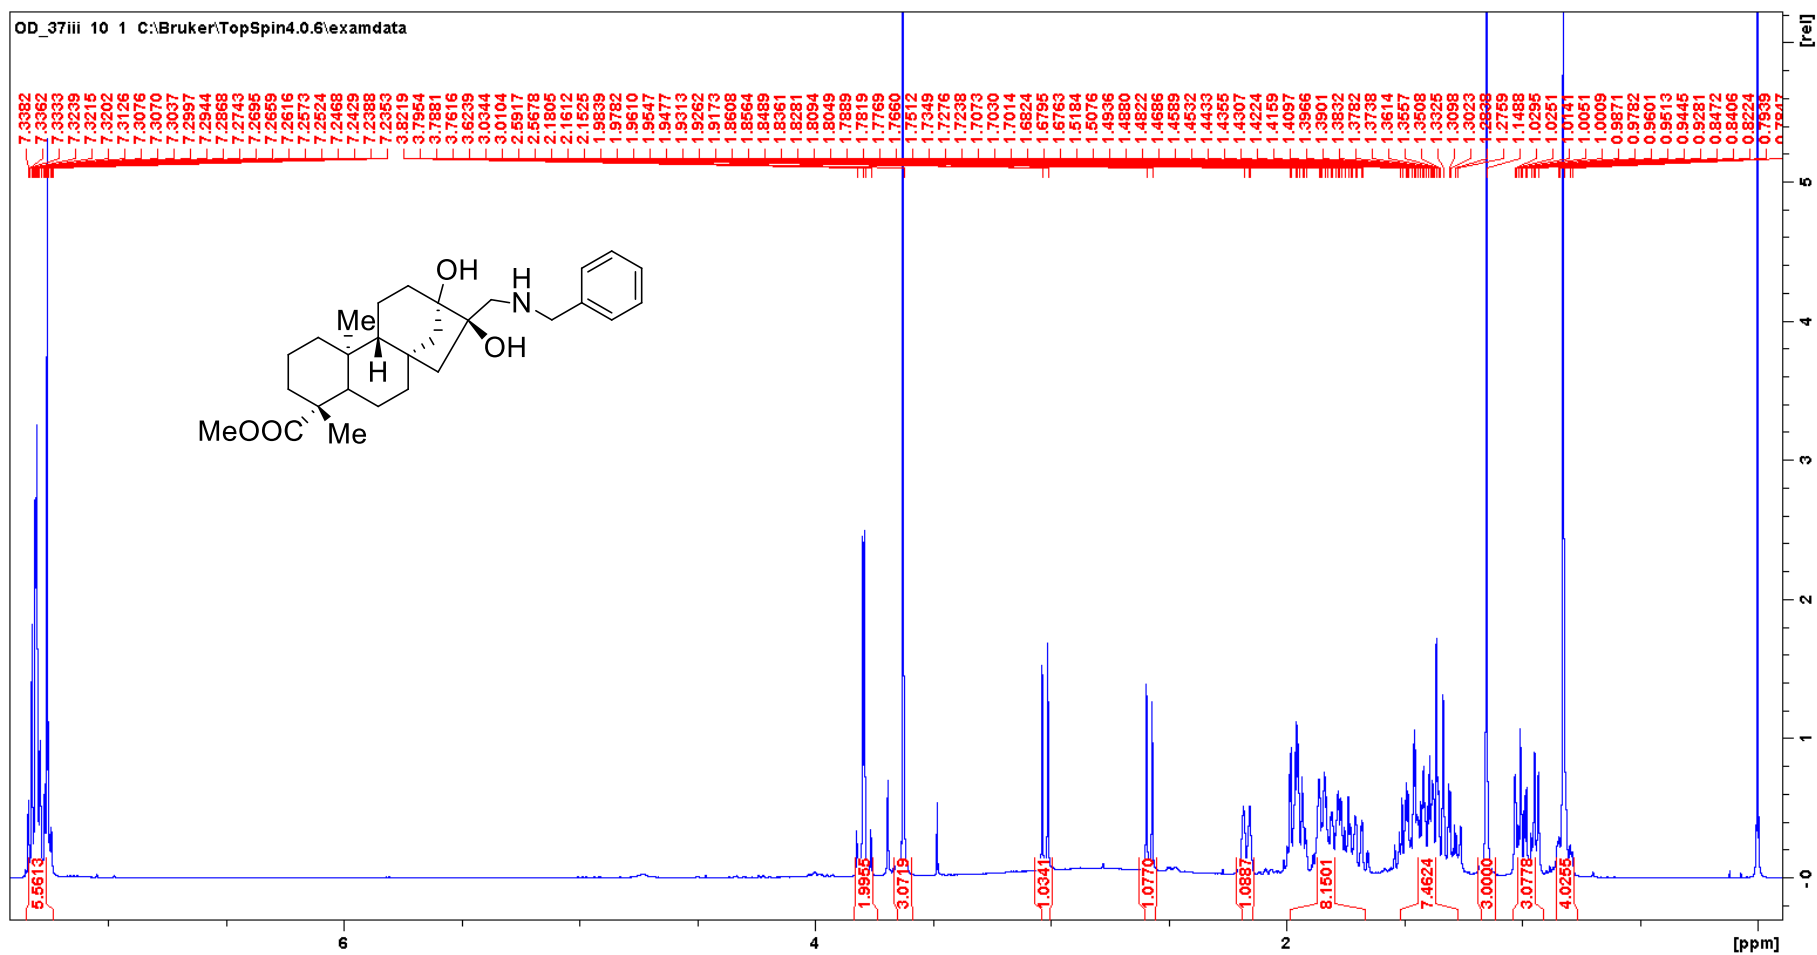

<sup>13</sup>C-NMR of compound 22

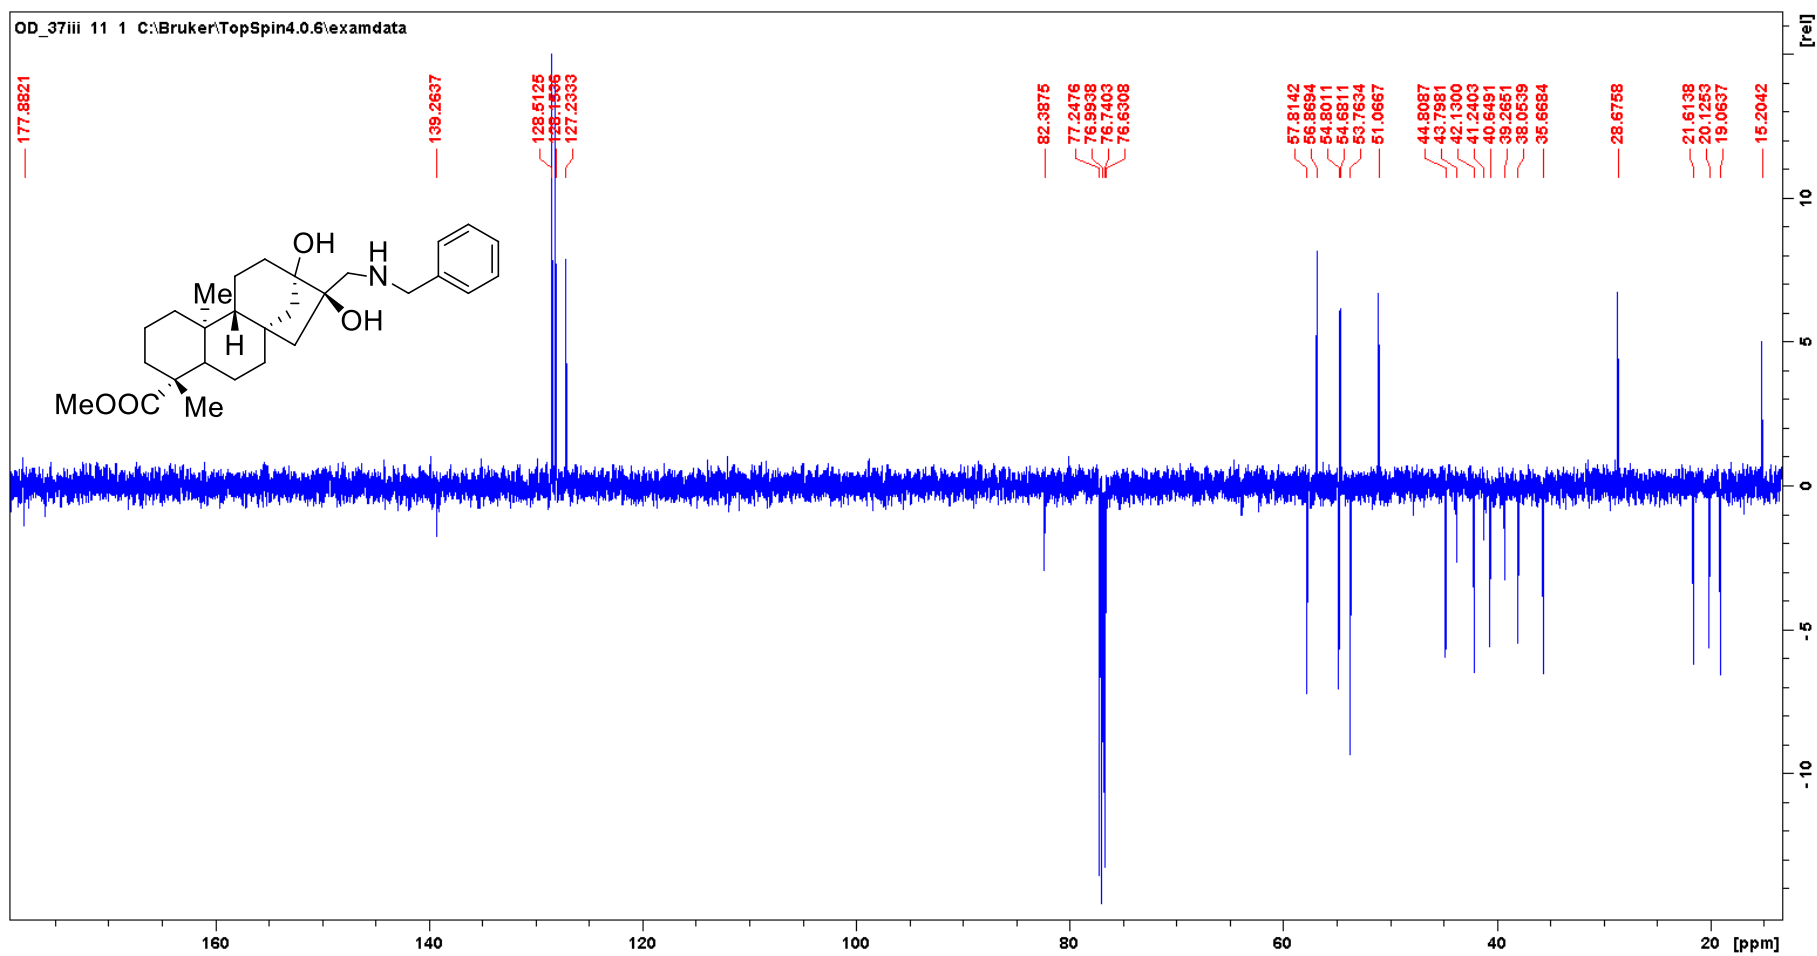

COSY of compound 22

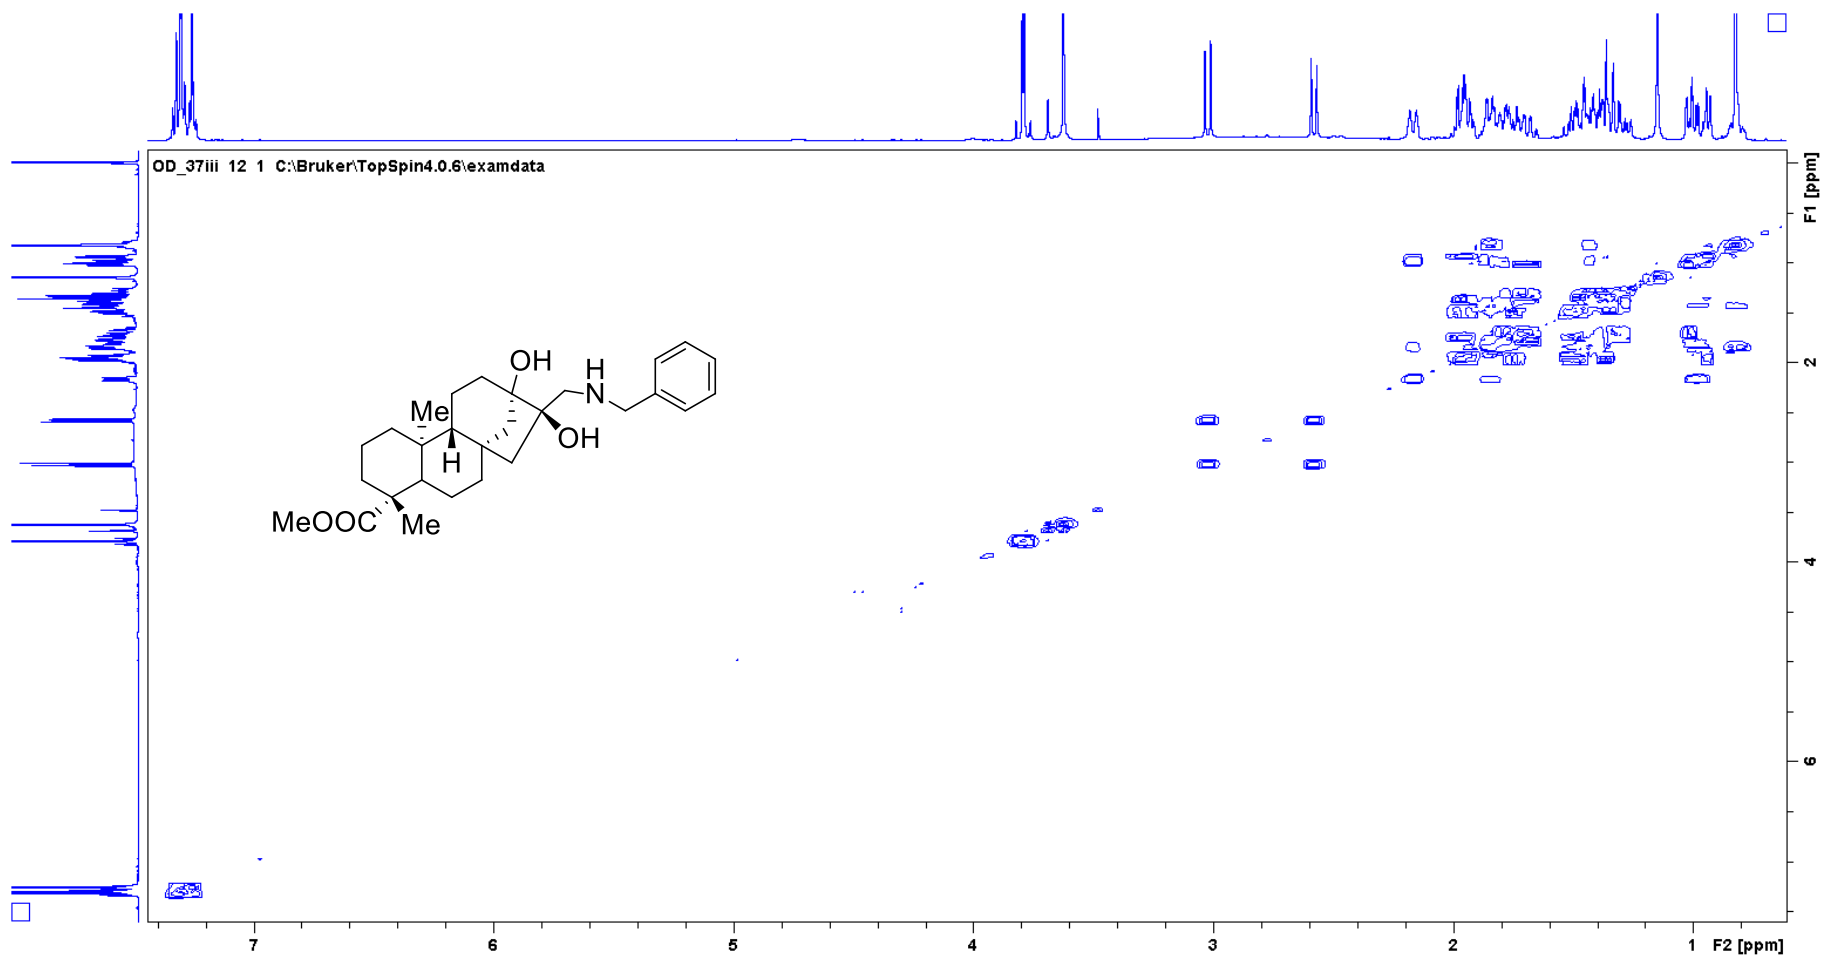

NOESY of compound 22

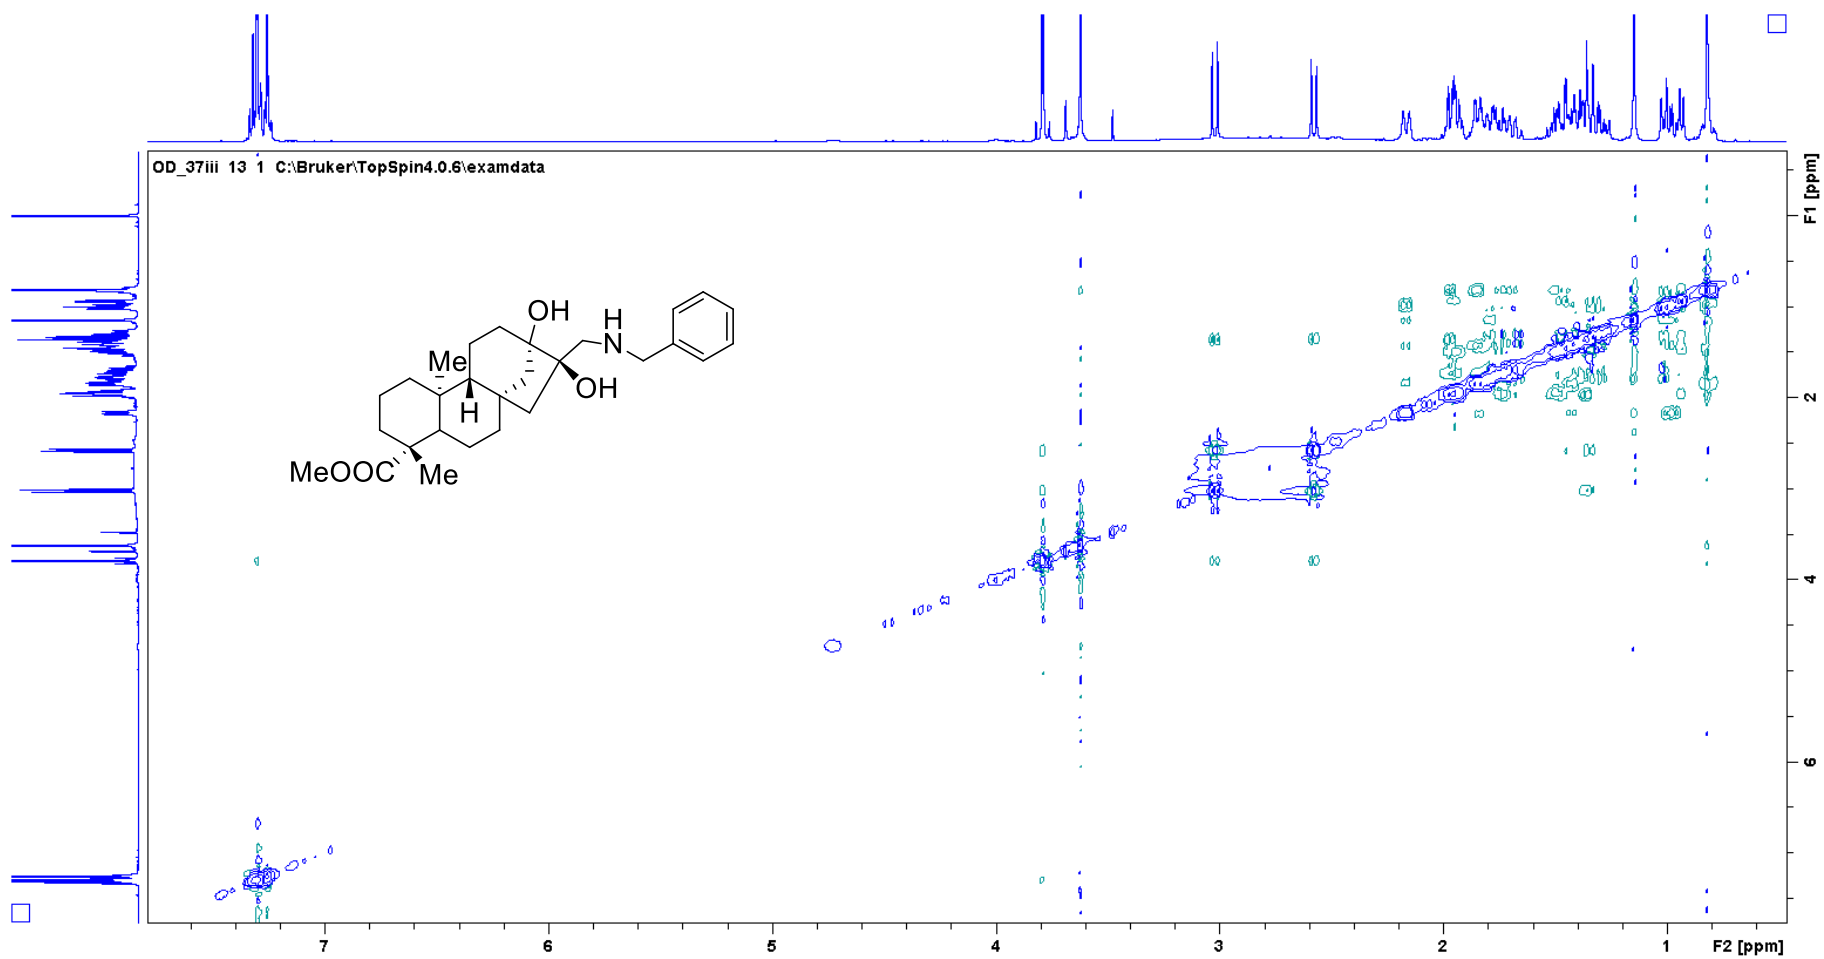

HSQC of compound 22

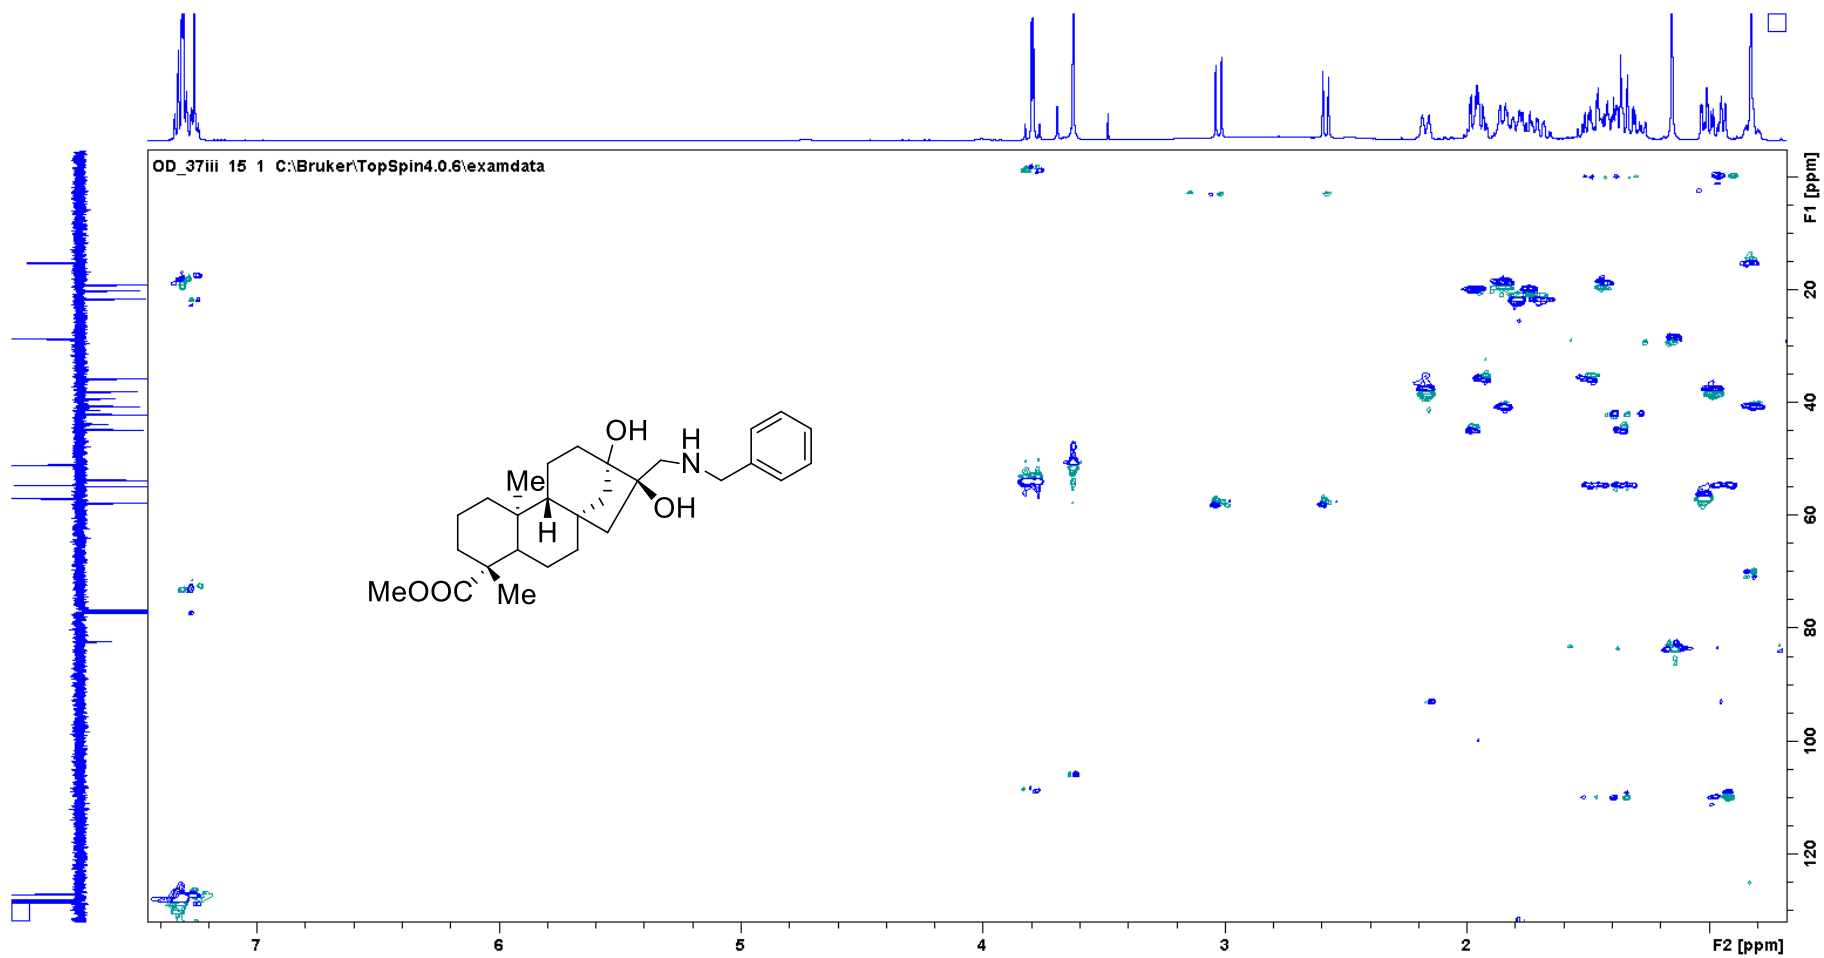

HMBC of compound 22

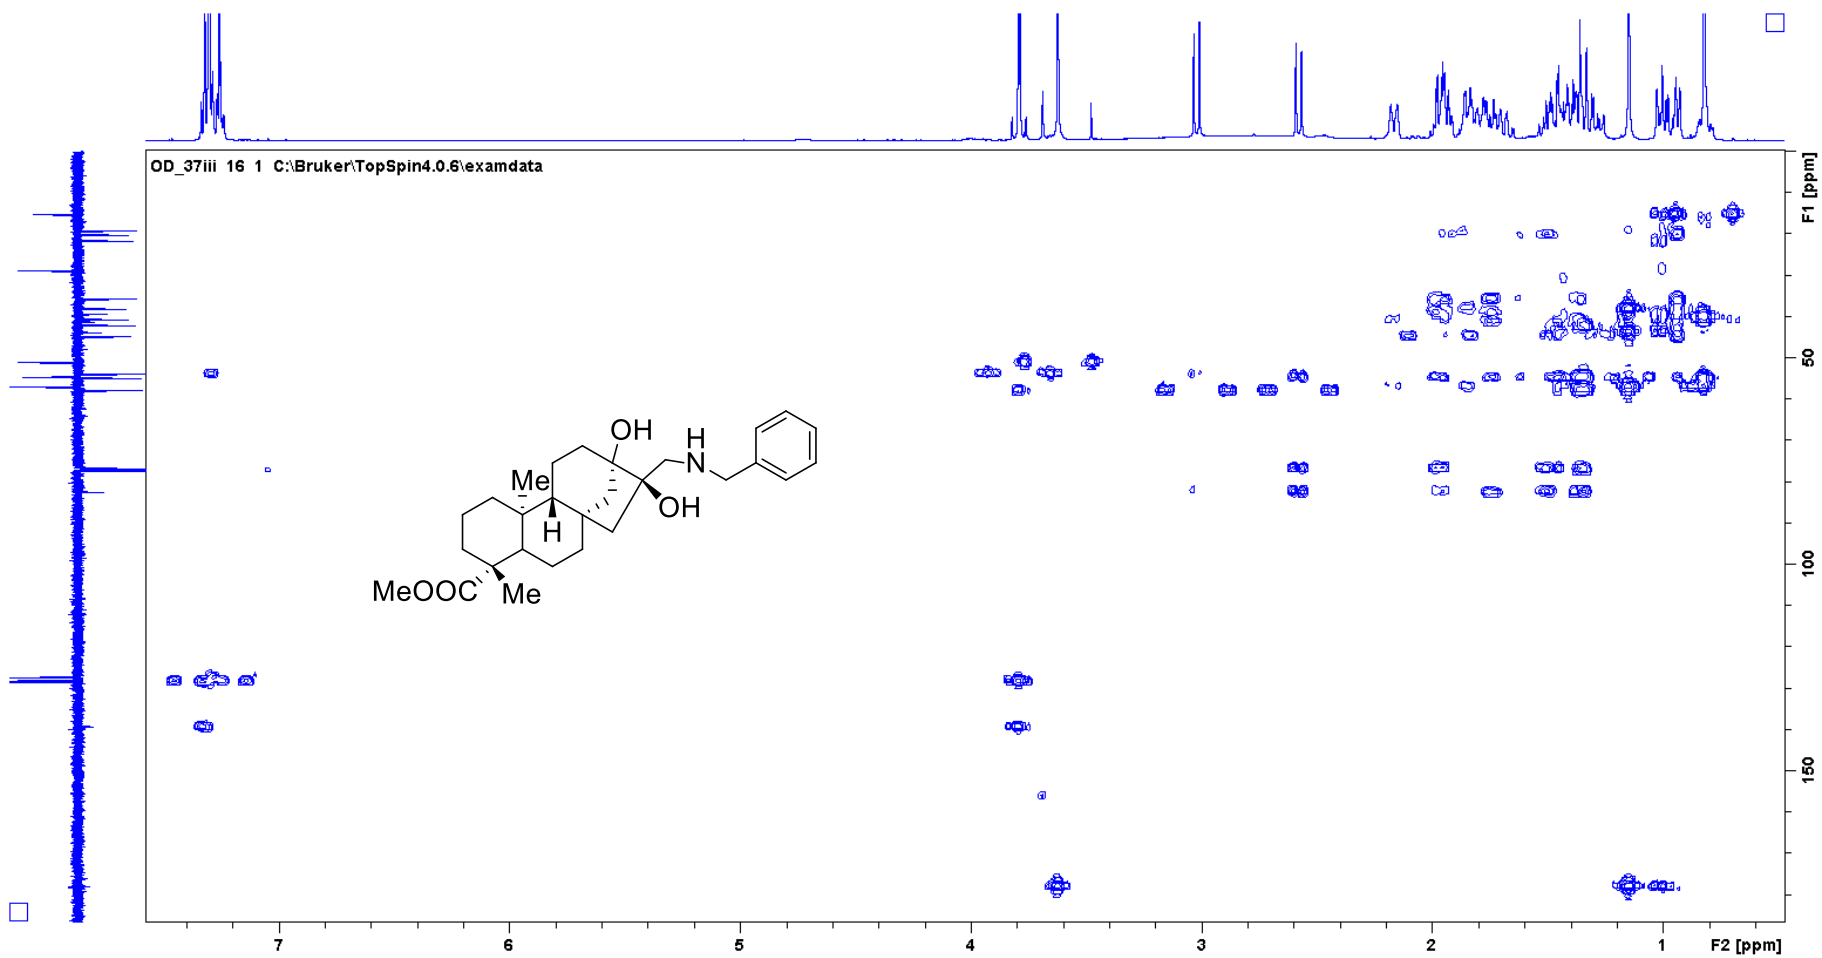

<sup>1</sup>H-NMR of compound 23

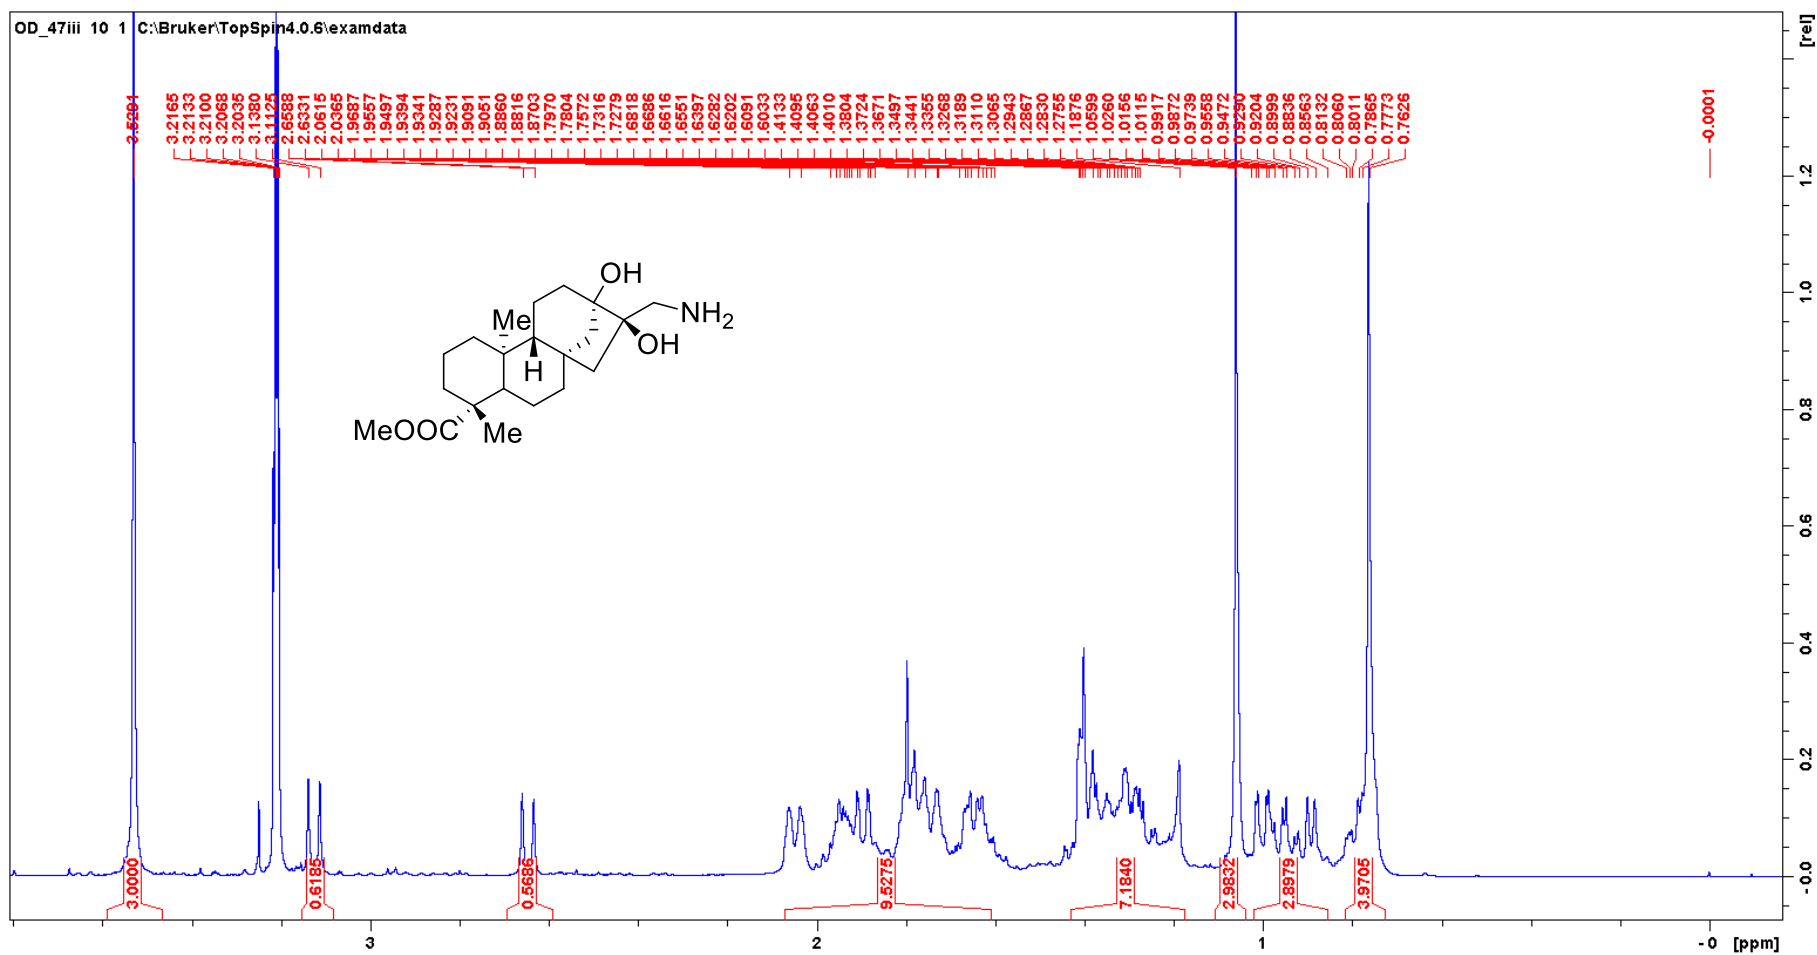



<sup>13</sup>C-NMR of compound 23

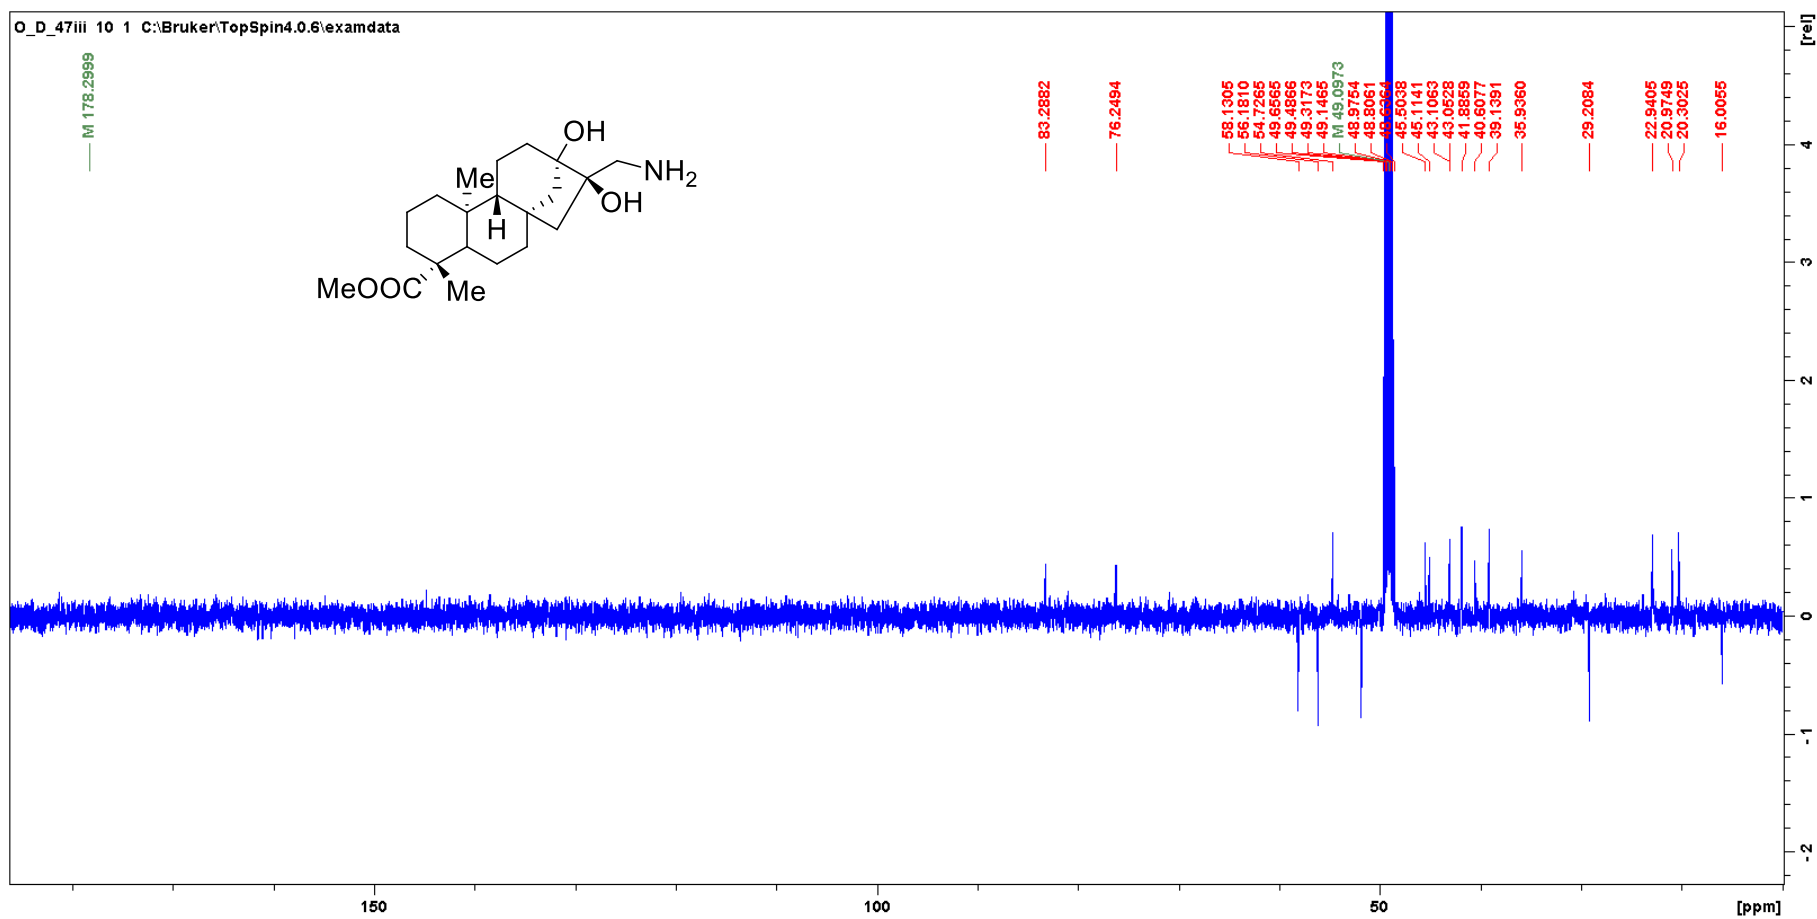

# HSQC-NMR of compound 23

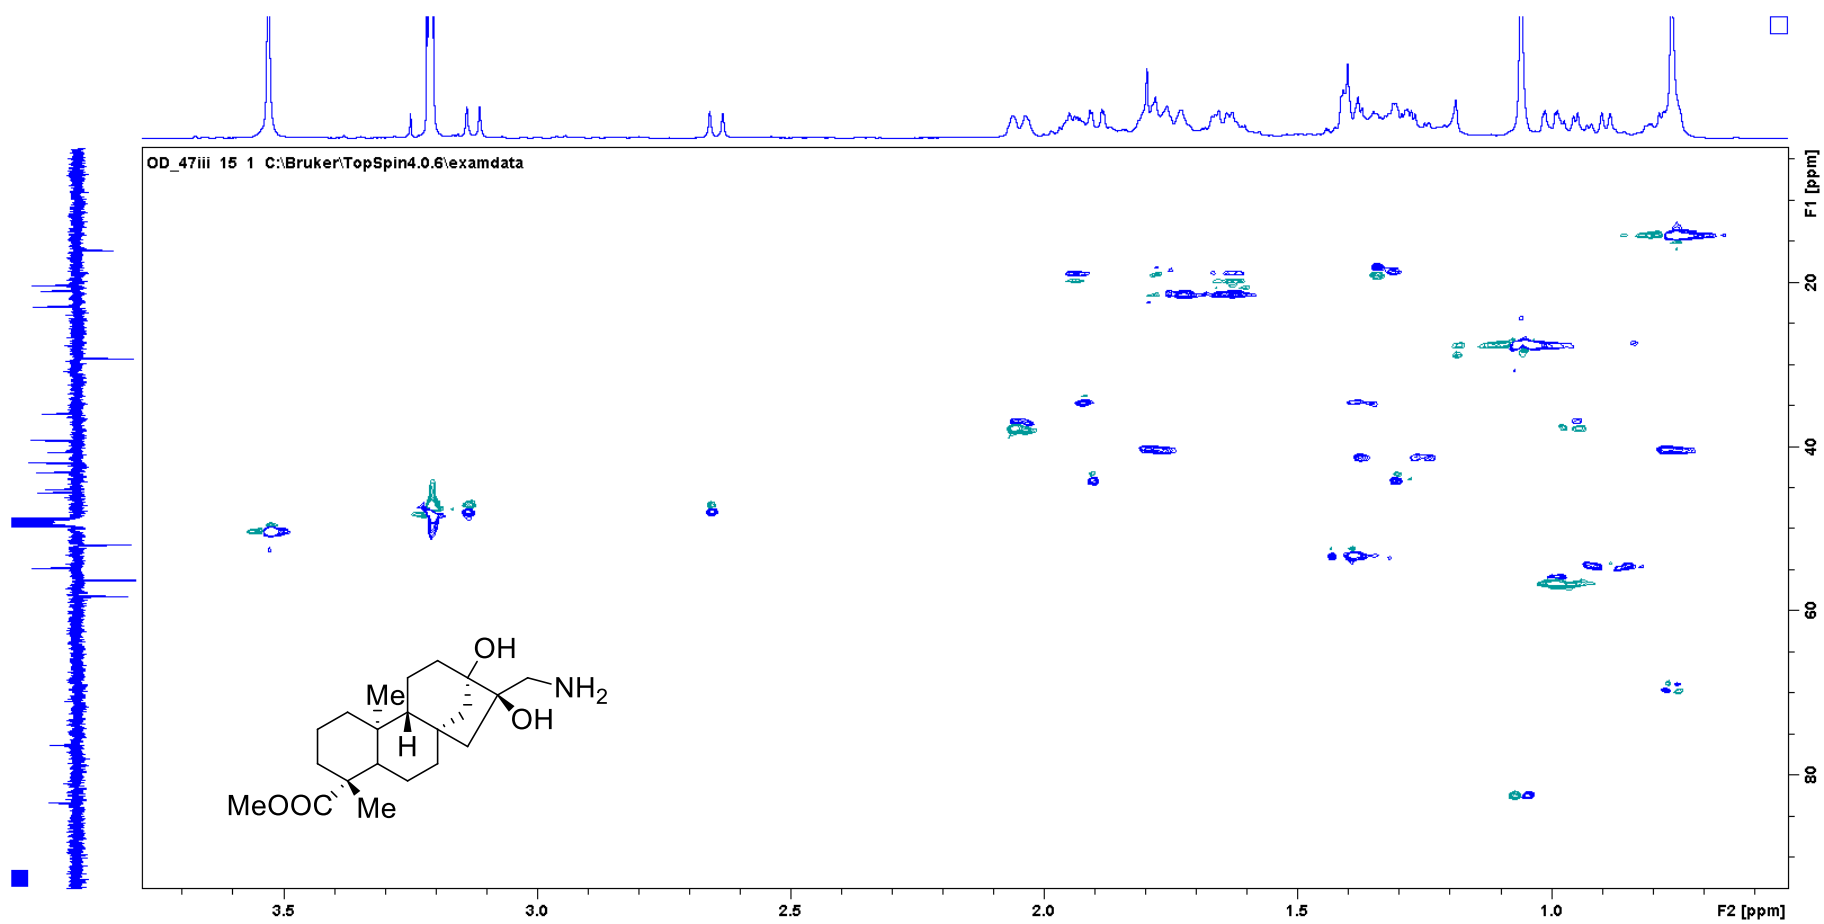

HMBC-NMR of compound 23

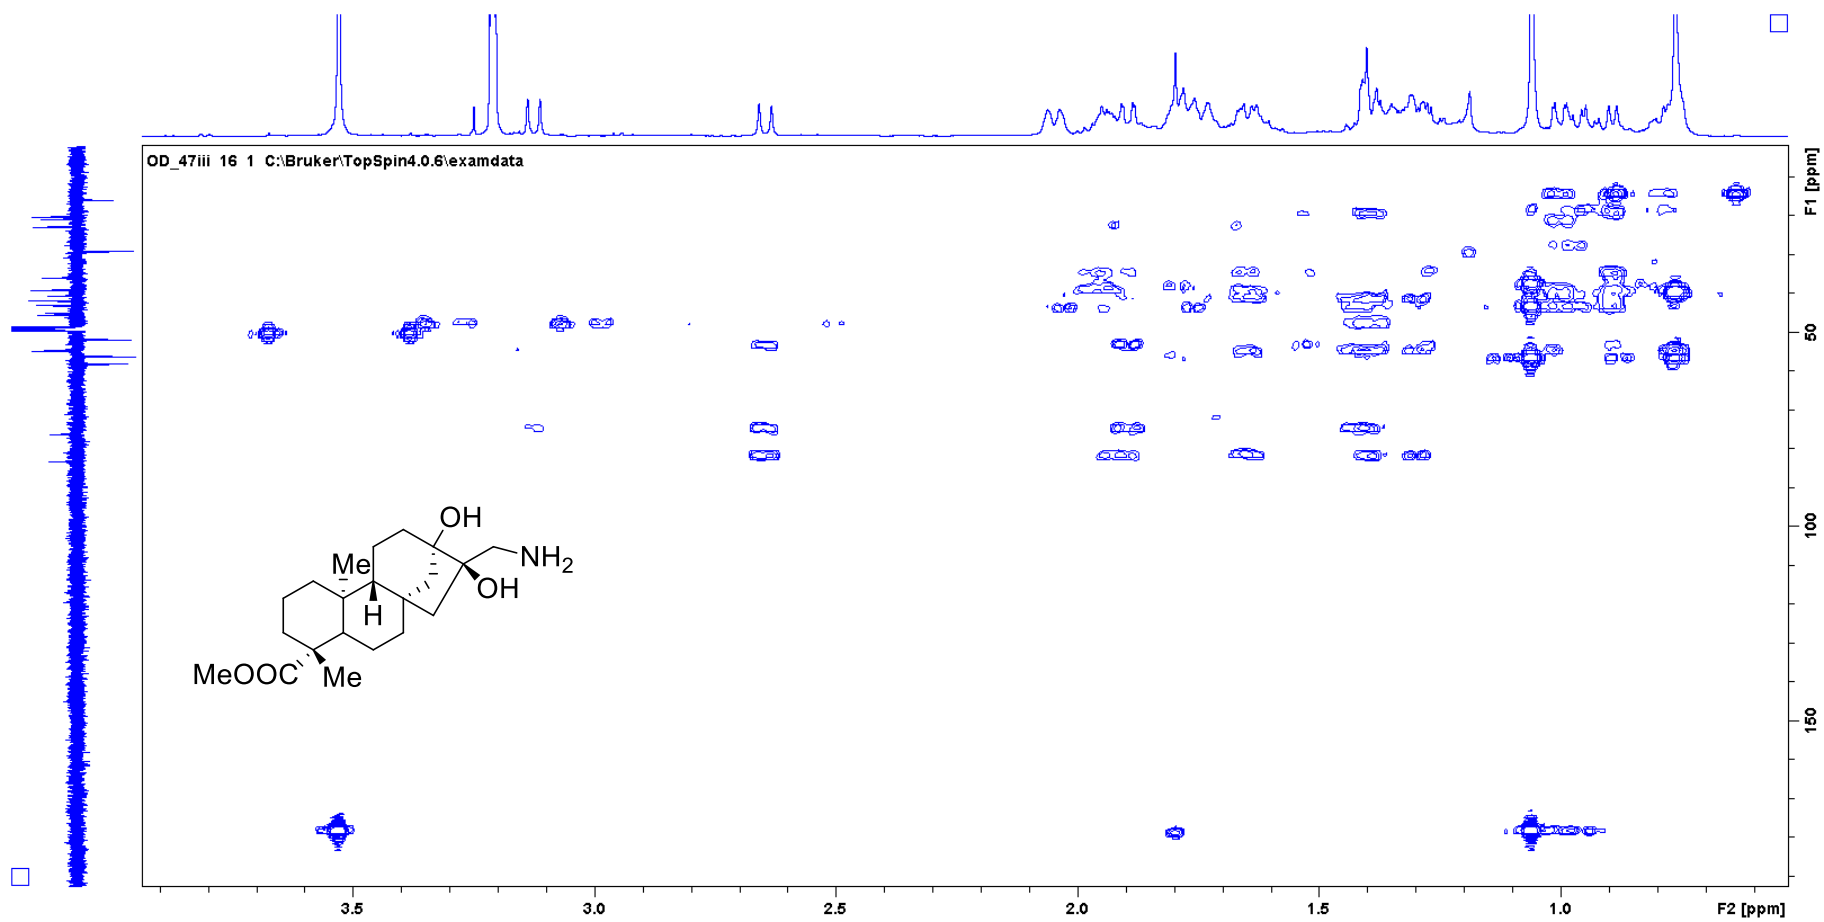

<sup>1</sup>H-NMR of compound 24A and 24B

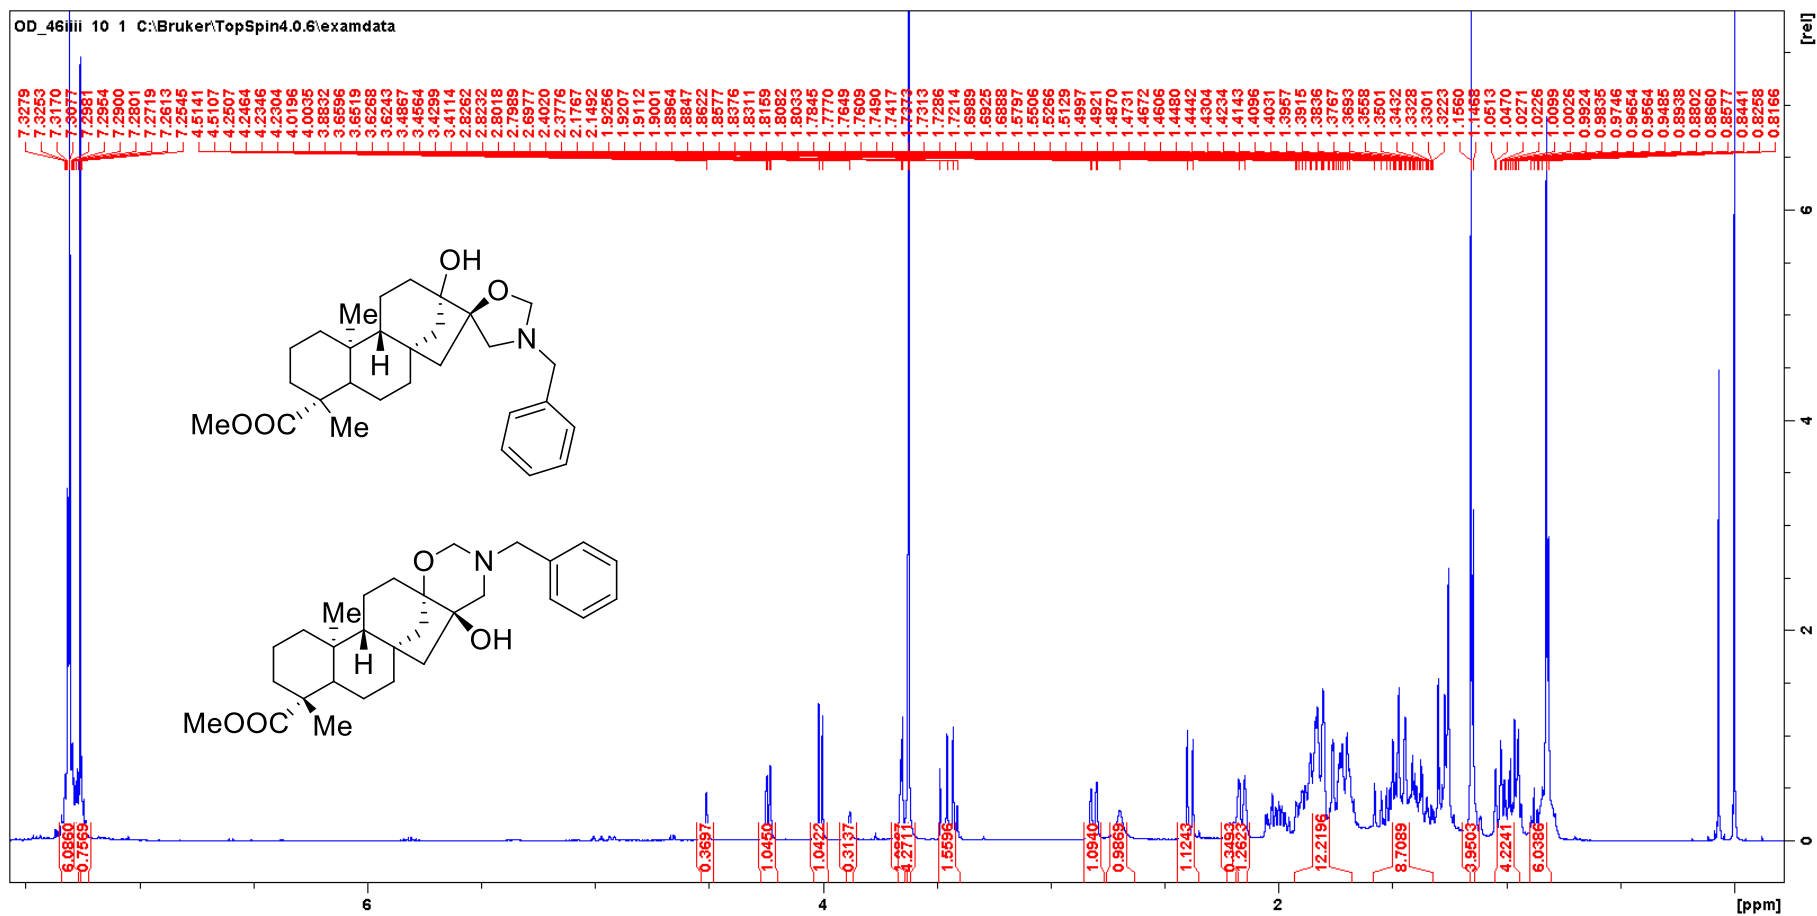

<sup>13</sup>C-NMR of compound 24A and 24B

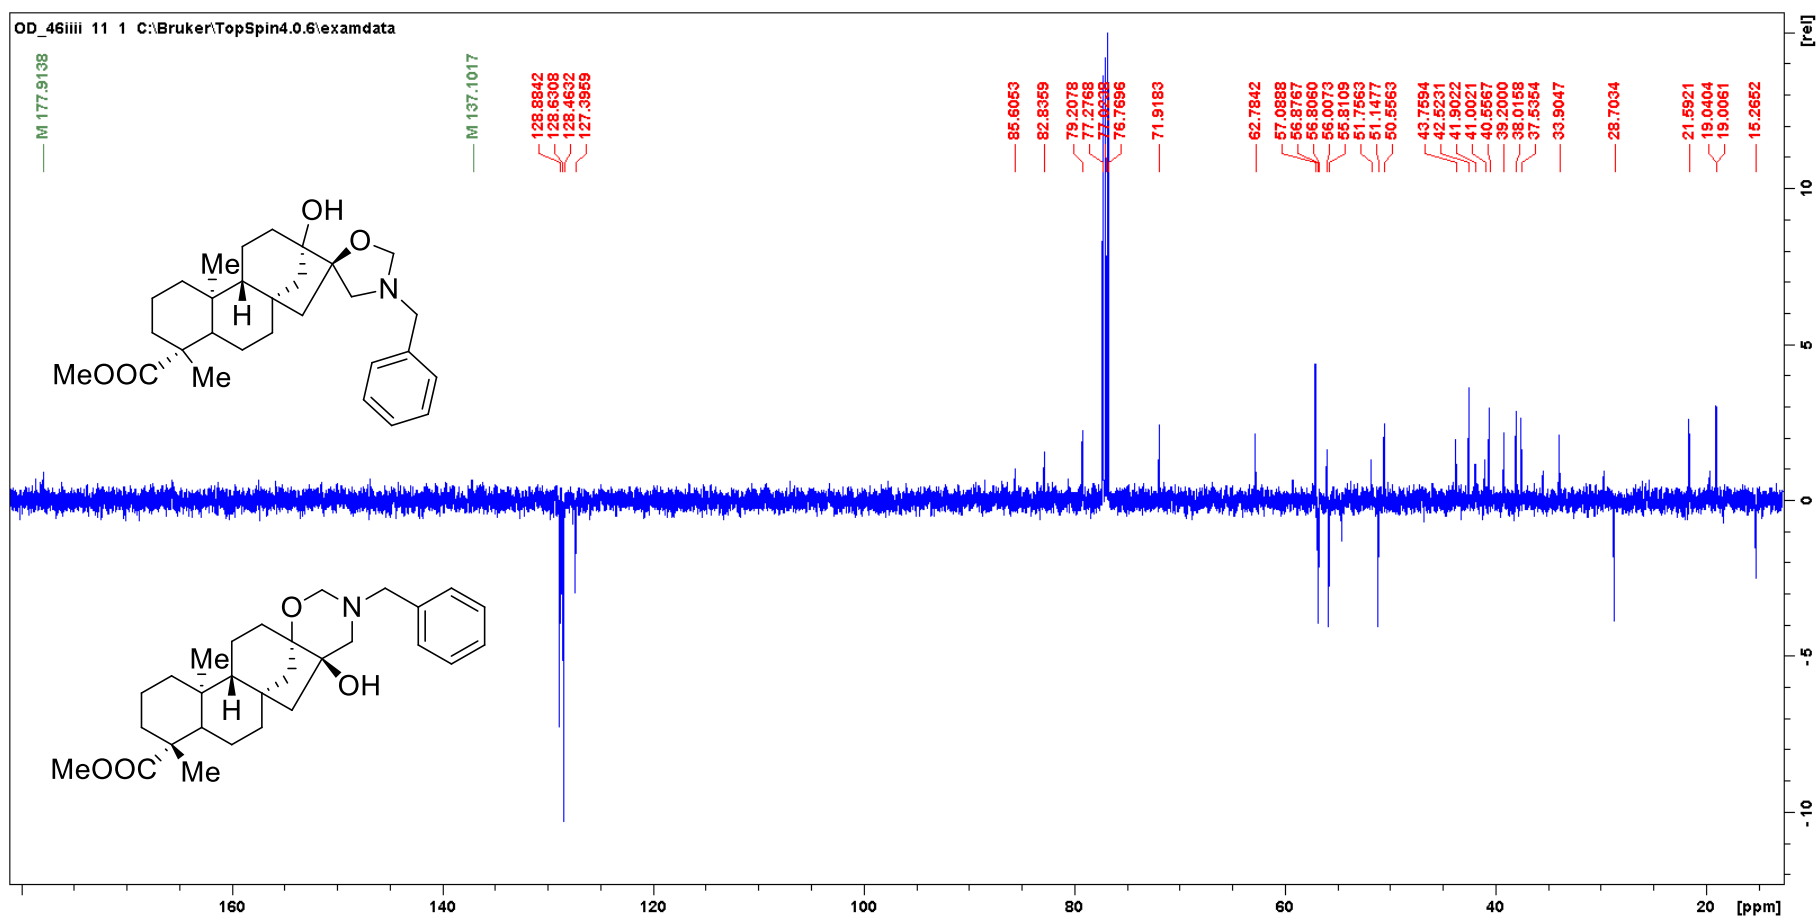

# HSQC of compound 24A and 24B

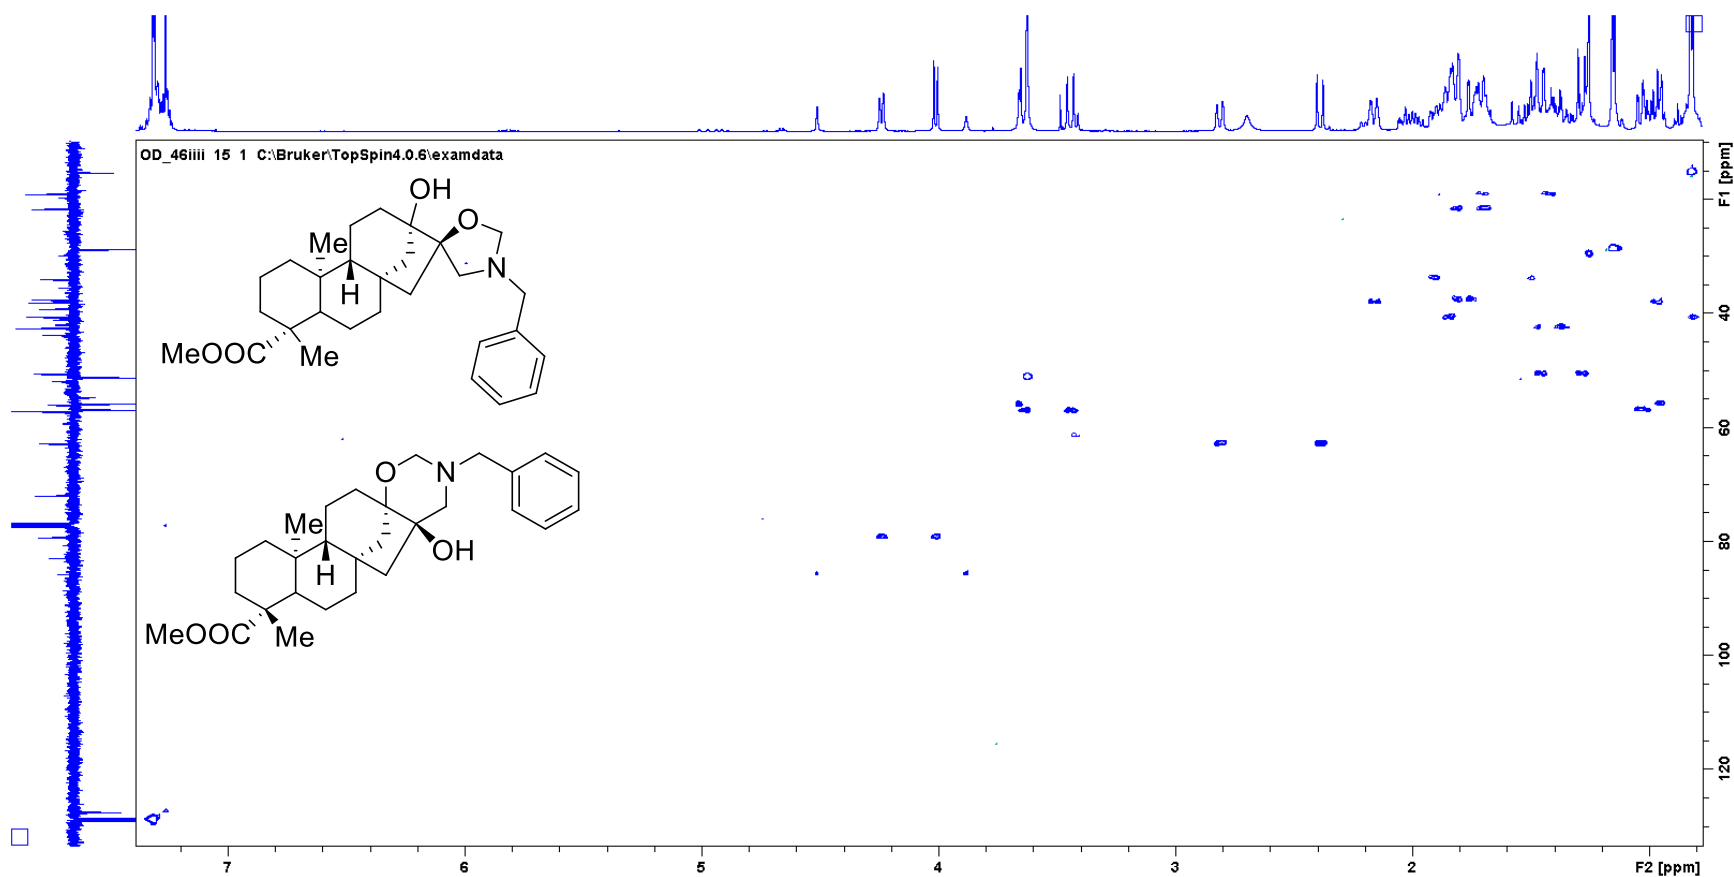

# HMBC of compound 24A and 24B

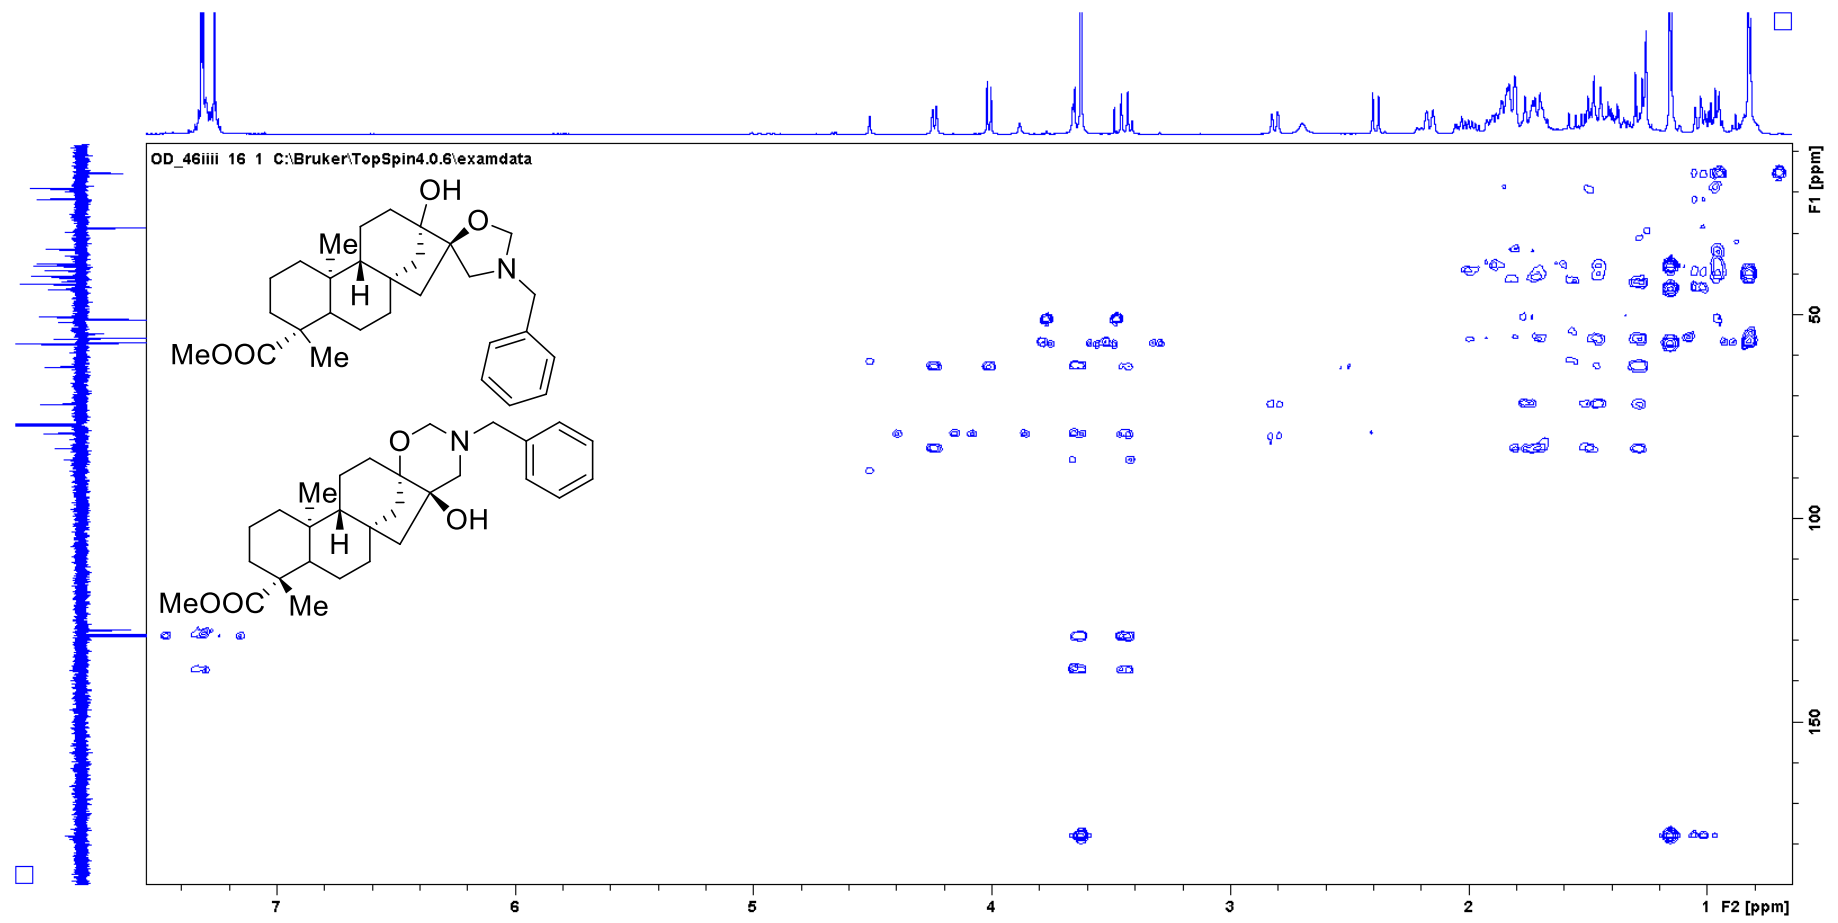

Supplement: s1 [file s1]
